# Supplementary material for: Intratumoural microbial metabolites in breast cancer: A longitudinal study on association with metastatic progression
Source: Research Square preprint supplement (doi:10.21203/rs.3.rs-7336523/v1), 2025-08-21
Supplement: Supplementary file 1 [file 26e8cc970e4abd96e3c3dc85.xlsx]

## Sheet: Table S1
Clinico-pathologic characteristics		Whole population (n=50)	With metastasis (n=10)	Without metastasis (n=40)	p valuea
Age in years	Mean (SD) (95% C.I)	54.72(11.97)[51.31-58.12]	50(11.41)[41.83-58.16]	55.9(11.95)[52.07-59.72]	0.166
Age group	36-50	21 (42%)	5 (50%)	16 (40%)	0.434
	51-65	16 (32%)	4 (40%)	12 (30%)
	Above 65	13 (26%)	1 (10%)	12 (30%)
BMI	Normal <25	15 (30%)	2 (20%)	13 (32.5%)	0.694
	Overweight <30	15 (30%)	3 (30%)	12 (30%)
	Obese >30	20 (40%)	5 (50%)	15 (37.5%)
Menopausal status	Post menopausal	35 (70%)	5 (50%)	30 (75%)	0.009
	Perimenopausal	6 (12%)	4 (40%)	2 (5%)
	Pre-menopausal	9 (18%)	1 (10%)	8 (20%)
Duration of Breast feeding	Less than 6 months	8 (16%)	1 (10%)	7 (17.5%)	0.626
	6 - 12 months	10 (20%)	3 (30%)	7 (17.5%)
	More than 12 months	32 (64%)	6 (60%)	26 (65%)
Use of Contraceptives	Yes	7 (14%)	3 (30%)	4 (10%)	0.103
	No	43 (86%)	7 (70%)	36 (90%)
Family history of cancer	Yes	7 (14%)	1 (10%)	6 (15%)	0.684
	No	43 (86%)	9 (90%)	34 (85%)
Family of breast cancer	Yes	3 (6%)	0 (0%)	3 (7.5%)	0.372
	No	47 (94%)	10 (100%)	37 (92.5%)
Physical activity	Moderate	45 (90%)	10 (100%)	35 (87.5%)	0.239
	Vigorous	5 (10%)	0 (0%)	5 (12.5%)
Hypertension	Yes	22 (44%)	4 (40%)	18 (45%)	0.776
	No	28 (56%)	6 (60%)	22 (55%)
Diabetes Mellitus	Yes	14 (28%)	1 (10%)	13 (32.5%)	0.156
	No	36 (72%	9 (90%)	27 (67.5%)
Thyroid	Yes	12 (24%)	3 (30%)	9 (22.5%)	0.619
	No	38 (76%)	7 (70%)	31 (77.5%)
Hormone receptor status	HR+/HER2-	49 (98%)	10 (100%)	39 (97.5%)	0.614
	HR+/- HER2+	1 (2%)	0 (0%)	1 (2.5%)
Histology type	Invasive ductal carcinoma	44 (88%)	9 (90%)	35 (87.5%)	0.345
	Invasive lobular carcinoma	2 (4%)	1 (10%)	1 (2.5%)
	Others	4 (8%)	0 (0%)	4 (8%)
Ductal Carcinoma in situ	Present	33 (66%)	7 (70%)	26 (65%)	0.765
	Absent	17 (34%)	3 (30%)	14 (35%)
Histological grade	Grade I	5 (10%)	1 (10%)	4 (10%)	0.989
	Grade II	21 (42%)	4 (40%)	17 (42.5%)
	Grade III	24 (48%)	5 (50%)	19 (47.5%)
Staging	II A	14 (28%)	2 (20%)	12 (30%)	0.877
	II B	9 (18%)	2 (20%)	7 (17.5%)
	III A	16 (32%)	3 (30%)	13 (32.5%)
	III B	1 (2%)	0 (0%)	1 (2.5%)
	III C	10 (20%)	3 (30%	7 (17.5%)
Lymph node status	Positive	36 (72%)	8 (80%)	28 (70%)	0.529
	Negative	14 (28%)	2 (20%)	14 (28%)
Lympho vascular invasion	Present	37 (74%)	9 (90%)	28 (70%)	0.197
	Absent	13 (26%)	1 (10%)	12 (30%)
Estrogen receptor status	Positive	48 (96%)	10 (100%)	38 (95%)	0.47
	Negative	2 (4%)	0 (0%)	2 (5%)
Progesterone receptor status	Positive	49 (98%)	10 (100%)	39 (97.5%)	0.614
	Negative	1 (2%)	0 (0%)	1 (2.5%)
HER2 receptor status	Positive	1 (2%)	0 (0%)	1 (2.5%)	0.614
	Negative	49 (98%)	10 (100%)	39 (97.5%)
Adjuvant therapy	Yes	35 (70%)	9 (90%)	26 (65%)	0.123
	No	15 (30%)	1 (10%)	14 (35%)
Radiation therapy	Yes	35 (70%)	10 (100%)	25 (62.5%)	0.069
	No	15 (30%)	0 (0%)	15 (37.5%)
Hormone Therapy	Yes	44 (88%)	10 (100%)	34 (85%)	0.426
	No	6 (12%)	0 (0%)	6 (15%)
Pathological staging	pT1N1a	1 (2%)	1 (10%)	0 (0%)	0.653
	pT2(m)N0	1 (2%)	0 (0%)	1 (2.5%)
	pT2N0	13 (26%)	2 (20%)	11 (27.5%)
	pT2N1	2 (4%)	0 (0%)	2 (5%)
	pT2N1a	6 (12%)	1 (10%)	5 (12.5%)
	pT2N2	1 (2%)	0 (0%)	1 (2.5%)
	pT2N2a	8 (16%)	2 (20%)	6 (15%)
	pT2N3a	6 (12%)	2 (20%)	4 (10%)
	pT3(m)N1a	1 (2%)	0 (0%)	1 (2.5%)
	pT3N1	2 (4%)	0 (0%)	2 (5%)
	pT3N1a	1 (2%)	0 (0%)	1 (2.5%)
	pT3N2a	3 (6%)	1 (10%)	2 (5%)
	pT3N3	1 (2%)	1 (10%)	0 (0%)
	pT3N3a	1 (2%)	0 (0%)	1 (2.5%)
	pT4bN2a	1 (2%)	0 (0%)	1 (2.5%)
	pT4bN3a	2 (4%)	0 (0%)	2 (5%)
Clinical staging	c T2N1M0	3 (6%)	0 (0%)	3 (7.5%)	0.082
	cT1N0M0	2 (4%)	1 (10%)	1 (2.5%)
	cT1N1M0	1 (2%)	0 (0%)	1 (2.5%)
	cT2 N1M0	1 (2%)	0 (0%)	1 (2.5%)
	cT2N0M0	19 (38%)	2 (20%)	17 (42.5%)
	cT2N0Mx	1 (2%)	1 (10%)	0 (0%)
	cT2N1M0	14 (28%)	2 (20%)	12 (30%)
	cT2N2aM0	1 (2%)	0 (0%)	1 (2.5%)
	cT2NxM0	1 (2%)	0 (0%)	1 (2.5%)
	cT3N1M0	2 (4%)	1 (10%)	1 (2.5%)
	cT4bM0	1 (2%)	1 (10%)	0 (0%)
	cT4bN1M0	1 (2%)	0 (0%)	1 (2.5%)
	cT4bN3M0	1 (2%)	0 (0%)	1 (2.5%)
	cT4N1M0	1 (2%)	1 (10%)	0 (0%)
	cT4N2M0	1 (2%)	1 (10%)	0 (0%)
Table S1: Clinico-pathological characteristics of the breast cancer patients.
a Pearson Chi-square test

## Sheet: Table S2
Sample ID	Metastatic Site
PM_T1	PECTORALIS MAJOR MUSCLE WITH RECURRENT NODULE
PM_T2	OVARY
PM_T3	LIVER & GALL BLADDER
PM_T4	BRAIN-METS
PM_T5	LEFT BREAST
PM_T6	LIVER
PM_T7	LUNG+BONE METS
PM_T8	ILIAC BONE LESION
PM_T9	LIVER
PM_T10	LUNG
Table S2: Site of metastatis in study population
