# Supplementary material for: Intratumoural microbial metabolites in breast cancer: A longitudinal study on association with metastatic progression
Source: Research Square preprint supplement (doi:10.21203/rs.3.rs-7336523/v1), 2025-08-21
Supplement: Supplementary file 2 [file 4b3495858de0cf5e95b602ea.xlsx]

## Sheet: Compounds
Checked	Name	Formula	Annot. Source: Predicted Compositions	Annot. Source: mzCloud Search	Annot. Source: Metabolika Search	Annot. Source: ChemSpider Search	Annot. DeltaMass [ppm]	Calc. MW	m/z	RT [min]	# ChemSpider Results	# mzCloud Results	mzCloud Best Match Confidence	MS2	Reference Ion	Area: M_T1.raw (F8)	Area: M_T2.raw (F9)	Area: M_T3.raw (F10)	Area: M_T4.raw (F11)	Area: M_T5.raw (F12)	Area: M_T6.raw (F13)	Area: M_T7.raw (F14)	Area: M_T8.raw (F15)	Area: M_T9.raw (F16)	Area: M_T10.raw (F17)	Area: M_TA1.raw (F18)	Area: M_TA2.raw (F19)	Area: M_TA3.raw (F20)	Area: M_TA4.raw (F21)	Area: M_TA5.raw (F22)	Area: M_TA6.raw (F23)	Area: M_TA7.raw (F24)	Area: M_TA9.raw (F25)	Area: M_TA10.raw (F26)	Area: Blank_03.raw (F1)	Area: Blank_04.raw (F2)	Area: Blank_05.raw (F3)	Area: Pooled_QC_1.raw (F47)	Area: Pooled_QC_2.raw (F48)	Area: Pooled_QC_3.raw (F49)	Area: Pooled_QC_4.raw (F50)	Area: Pooled_QC_5.raw (F51)	Area: Pooled_QC_6.raw (F52)	Area: Pooled_QC_7.raw (F53)	Area: NM_T7.raw (F27)	Area: NM_T11.raw (F28)	Area: NM_T12.raw (F29)	Area: NM_T15.raw (F30)	Area: NM_T19.raw (F31)
TRUE	Bupivacaine	C18 H28 N2 O	Full match	Full match	No results	Full match	2.34	288.221	289.228	8.334	3	1	98.1	DDA for preferred ion	[M+H]+1	4.15866e+07	1.59314e+06	1.55486e+09	1.11636e+06	831257	1.09333e+06	499564	982474	1.00434e+06	1.13167e+06	1.35267e+08	2.44532e+06	4.57128e+10	1.93397e+07	1.25779e+07	1.10861e+06	750119	623254	1.63422e+06	63664	54292.5	54561.9	1.95674e+08	2.14854e+08	1.81455e+08	1.7575e+08	2.08937e+08	1.66013e+08	1.90136e+08	729124	2.68533e+06	2.38971e+06	1.70745e+06	2.9004e+06
TRUE	POPC	C42 H82 N O8 P	Full match	No results	No results	Full match	1.48	759.579	760.586	12.049	52	0		No MS2	[M+H]+1	6.91793e+07	6.5547e+06	3.10851e+07	4.03046e+08	1.11839e+08	3.98912e+07	1.18764e+07	3.4703e+07	8.55303e+07	4.832e+07	4.44158e+07	1.80044e+07	1.53959e+07	2.4315e+07	3.7585e+07	2.96127e+07	9.9575e+06	2.09676e+07	2.46494e+07	469833	454437	486820	3.6051e+07	3.2408e+07	4.0522e+07	3.07189e+07	1.90232e+07	2.99931e+07	4.16877e+09	2.48792e+07	4.42385e+07	1.77513e+07	5.83794e+07	2.68487e+07
TRUE		C54 H121 N8 O18 P3 S	Full match	No results	No results	No results	-0.07	1294.77	648.394	8.899	0	0		DDA for other ion	[M+2H]+2	1.32235e+08	2.07715e+08	1.27413e+07	1.59397e+07	1.2364e+07	4.72213e+07	1.03952e+07	3.70266e+07	1.79762e+07	3.69726e+07	8.33612e+08	2.57301e+08	2.40737e+07	1.08173e+08	2.7e+07	1.35763e+09	2.22513e+07	3.25519e+07	6.26914e+07	8.56848e+06	5.66919e+06	7.75316e+06	9.2179e+07	1.09995e+08	9.21408e+07	7.26644e+07	8.23024e+07	1.40151e+08	8.97897e+07	1.05717e+07	2.93884e+07	1.70677e+07	4.49807e+08	1.66936e+09
TRUE		C66 H114 N7 O10 P3 S	Full match	No results	No results	No results	0.01	1289.76	645.885	8.888	0	0		DDA for other ion	[M+2H]+2	1.02158e+08	2.07715e+08	1.05591e+07	1.52854e+07	1.2364e+07	4.72213e+07	1.57364e+07	3.70266e+07	1.75831e+07	3.34781e+07	8.33612e+08	2.57301e+08	3.04875e+07	1.08173e+08	2.7e+07	1.35763e+09	2.22513e+07	3.86403e+07	5.19505e+07	1.13463e+07	9.84933e+06	9.15452e+06	9.2179e+07	1.11033e+08	9.8418e+07	9.30761e+07	7.94122e+07	9.69095e+07	9.63367e+07	1.05717e+07	2.93884e+07	2.22735e+07	4.49807e+08	1.66936e+09
TRUE		C52 H117 N8 O17 P3 S	Full match	No results	No results	No results	-0.03	1250.75	626.381	8.891	0	0		DDA for other ion	[M+2H]+2	1.35245e+08	1.83383e+08	1.26067e+07	1.48679e+07	1.37934e+07	3.95037e+07	1.31763e+07	3.61902e+07	1.78518e+07	3.86621e+07	6.74097e+08	2.3702e+08	2.5245e+07	1.12902e+08	2.30082e+07	1.14937e+09	2.00734e+07	3.24023e+07	5.45788e+07	7.78122e+06	1.03432e+07	9.96952e+06	9.63513e+07	1.02219e+08	9.61088e+07	8.19518e+07	8.76763e+07	9.50515e+07	8.37302e+07	1.46653e+07	2.89888e+07	1.72382e+07	4.02473e+08	1.71127e+09
TRUE		C61 H109 N5 O17 P2	Full match	No results	No results	No results	0.38	1245.73	623.872	8.881	0	0		DDA for other ion	[M+2H]+2	1.35245e+08	1.83383e+08	1.26067e+07	1.48679e+07	1.37934e+07	3.67316e+07	1.31763e+07	3.61902e+07	1.77754e+07	3.86621e+07	6.74097e+08	2.3702e+08	4.61869e+07	1.12902e+08	2.30082e+07	1.14937e+09	1.89236e+07	3.24023e+07	5.45788e+07	1.3533e+07	1.1661e+07	1.59358e+07	9.63513e+07	1.02219e+08	8.91628e+07	8.93962e+07	7.22746e+07	9.58982e+07	9.4697e+07	1.46653e+07	2.89888e+07	1.77625e+07	4.02473e+08	1.71127e+09
TRUE	POPC	C42 H82 N O8 P	Full match	No results	No results	Full match	1.82	759.579	760.587	12.552	52	0		No MS2	[M+H]+1	3.03934e+09	9.10456e+07	4.41159e+09	4.55987e+09	3.36253e+09	3.56732e+09	2.67652e+07	1.08798e+10	5.91735e+09	5.41227e+09	3.19176e+09	5.26661e+07	3.82664e+09	8.31252e+09	5.12621e+09	5.22075e+09	2.24866e+07	5.33592e+09	5.68717e+09	1.27426e+06	1.24308e+06	1.24591e+06	3.37032e+09	1.62564e+09	4.34172e+09	4.27086e+09	4.26983e+09	3.03833e+09	1.37017e+09	4.74043e+09	3.34738e+09	4.07178e+07	8.31368e+09	4.82487e+09
TRUE	1-[(9Z)-octadecenoyl]-2-tetradecanoyl-sn-glycero-3-phosphocholine	C40 H78 N O8 P	Full match	No results	No results	Full match	2.12	731.548	732.555	13.747	49	0		No MS2	[M+H]+1	6.07975e+06	3.35075e+09	4.45292e+09	2.14832e+09	3.91011e+09	6.28753e+06	2.82989e+09	2.93328e+09	1.88355e+09	4.03542e+09	1.69049e+07	3.61238e+09	3.88901e+09	3.27094e+09	2.84151e+09	1.12342e+07	3.38064e+09	2.90964e+09	2.91627e+09	1.45648e+06	1.55335e+06	1.9231e+06	1.9305e+09	8.97281e+06	3.9916e+07	7.78956e+06	7.1474e+06	8.7474e+06	2.40689e+06	2.66984e+09	1.8451e+07	4.87737e+09	2.41011e+09	3.24455e+09
TRUE		C64 H108 N2 O15 P2	Full match	No results	No results	No results	-0.53	1206.72	604.368	8.87	0	0		DDA for other ion	[M+2H]+2	1.18195e+08	1.54011e+08	1.48853e+07	1.43e+07	1.7913e+07	3.85322e+07	1.43689e+07	3.43914e+07	2.18821e+07	2.76033e+07	7.19509e+08	2.40276e+08	4.04649e+07	1.04059e+08	3.04769e+07	9.45379e+08	1.79076e+07	3.1938e+07	6.43533e+07	1.13345e+07	1.0073e+07	9.90155e+06	8.49368e+07	9.75895e+07	8.49584e+07	9.65874e+07	7.2001e+07	9.03612e+07	7.8793e+07	1.48213e+07	3.17077e+07	1.89706e+07	3.92877e+08	1.3074e+09
TRUE		C60 H101 N9 O12 P2	Full match	No results	No results	No results	-0.51	1201.7	601.859	8.858	0	0		DDA for other ion	[M+2H]+2	1.18195e+08	1.54011e+08	1.48853e+07	1.25915e+07	1.7913e+07	3.85322e+07	2.07116e+07	3.47184e+07	1.54792e+07	2.76033e+07	7.19509e+08	2.40276e+08	4.89593e+07	1.04059e+08	4.19937e+07	9.45379e+08	1.79076e+07	4.45203e+07	6.43533e+07	2.09538e+07	1.94044e+07	2.2455e+07	7.80989e+07	9.67975e+07	1.00478e+08	7.78352e+07	8.29835e+07	1.11409e+08	7.78953e+07	1.91645e+07	3.17077e+07	1.92132e+07	3.92877e+08	1.3074e+09
TRUE		C39 H77 N3 O5 P2	Full match	No results	No results	No match	-2.34	729.532	730.54	11.732	41	0		No MS2	[M+H]+1	1.45046e+06	7.81536e+07	2.69435e+08	9.25624e+07	1.0749e+08	1.19433e+06	3.24307e+07	7.39617e+07	2.86462e+07	1.61048e+08	1.92826e+06	8.51591e+07	1.7373e+08	1.95713e+08	1.61981e+08	1.39856e+06	1.65974e+08	1.11913e+08	5.30383e+07	742676	715277	710717	1.261e+08	845034	781611	861451	1.1865e+06	758150	935791	9.39453e+07	1.77313e+06	6.53592e+08	4.67228e+07	2.87007e+08
TRUE	1-Palmitoyl-2-linoleoyl-sn-glycero-phosphatidylcholine	C42 H81 N O8 P	No results	No results	No results	Full match	-2.55	758.568	759.575	12.061	2	0		No MS2	[M+H]+1	8.48769e+06	8.75349e+06	2.76585e+07	4.03046e+08	1.11839e+08	7.99139e+06	9.17334e+06	4.76041e+07	1.25654e+08	7.36839e+07	4.44158e+07	3.01402e+07	1.53959e+07	1.23584e+08	6.93242e+07	7.63896e+07	2.12868e+07	3.03575e+07	3.71335e+07	751135	726522	778293	6.51075e+06	3.2408e+07	7.10964e+07	4.04702e+07	8.45839e+06	4.2112e+07	6.03343e+06	4.07081e+07	1.00074e+08	2.65797e+07	1.4075e+08	4.64048e+07
TRUE		C81 H121 N8 O8 P3	Full match	No results	No results	No results	-0.06	1426.85	714.433	8.943	0	0		DDA for other ion	[M+2H]+2	9.33584e+07	1.41348e+08	5.53261e+06	7.33706e+06	6.51373e+06	2.38937e+07	6.30579e+06	1.90582e+07	9.20568e+06	2.17268e+07	5.4111e+08	1.84015e+08	1.07487e+07	1.08723e+08	1.47553e+07	1.03019e+09	1.0648e+07	2.03799e+07	4.03505e+07	2.98867e+06	2.44145e+06	2.33383e+06	6.02925e+07	5.66133e+07	6.31155e+07	3.01926e+07	4.77082e+07	5.81652e+07	4.78226e+07	5.43862e+06	1.55052e+07	1.1623e+07	3.49979e+08	1.36026e+09
TRUE	Dodecyl sulfate	C12 H26 O4 S	Full match	Full match	No results	No results	0.84	266.155	265.148	12.93	0	2	9.9	DDA for preferred ion	[M-H]-1	1.15029e+09	8.09298e+08	6.88744e+08	3.8449e+08	3.79606e+08	8.12057e+08	3.71233e+08	4.37056e+08	4.3098e+08	3.9082e+08	2.53875e+09	8.01199e+07	1.72829e+09	6.98293e+08	6.31605e+08	2.54023e+09	7.6287e+08	7.98064e+08	1.11258e+09	3.81054e+08	3.86386e+08	3.73185e+08	4.45356e+08	4.86615e+08	4.18192e+08	5.42301e+08	4.89247e+08	4.91398e+08	5.23226e+08	1.23687e+09	4.1135e+09	1.23613e+09	1.5101e+09	1.32548e+09
TRUE		C40 H76 N7 O6 P	Full match	No results	No results	No match	1.86	781.561	782.568	12.047	62	0		No MS2	[M+H]+1	4.78651e+07	1.32338e+07	3.13643e+07	2.35542e+08	2.56264e+07	2.64579e+07	9.62593e+06	3.20263e+07	7.03151e+07	4.23759e+07	1.15177e+08	7.34097e+06	1.29494e+07	2.26667e+07	3.89488e+07	4.26765e+07	9.78206e+06	2.74148e+07	1.97047e+07	538858	521201	558341	1.90178e+07	2.37203e+07	3.64954e+07	1.64325e+07	1.69596e+07	2.01788e+07	1.27121e+09	2.28776e+07	4.17992e+07	1.64776e+07	5.16214e+07	5.69284e+06
TRUE		C64 H121 N6 O17 P3	Full match	No results	No results	No results	-0.23	1338.8	670.407	8.919	0	0		DDA for other ion	[M+2H]+2	1.36332e+08	1.97618e+08	8.32577e+06	1.61484e+07	9.56099e+06	3.63459e+07	8.37336e+06	2.66394e+07	1.39755e+07	4.22169e+07	7.07945e+08	2.18036e+08	1.85603e+07	1.17362e+08	1.96667e+07	1.18323e+09	1.62627e+07	3.00057e+07	5.9576e+07	5.14495e+06	5.34152e+06	5.66967e+06	7.84276e+07	8.52773e+07	9.08219e+07	5.70555e+07	7.83872e+07	8.57203e+07	7.50074e+07	1.05656e+07	2.49486e+07	1.75677e+07	3.86099e+08	2.22383e+09
TRUE	trans-3-Indoleacrylic acid	C11 H9 N O2	Full match	Full match	No results	Full match	2.35	187.064	188.071	4.862	1	3	73.3	DDA for preferred ion	[M+H]+1	3.17632e+09	4.18899e+09	3.25472e+09	1.51425e+09	1.58599e+09	1.34781e+09	4.21039e+08	1.84935e+09	2.30736e+09	1.5527e+09	1.85177e+08	6.54132e+08	1.88473e+08	8.58462e+08	3.24356e+08	5.75111e+08	4.09742e+08	6.65826e+08	3.51975e+08	860365	746879	801321	2.19614e+08	2.20643e+08	2.16775e+08	2.11907e+08	2.22554e+08	2.24703e+08	2.21591e+08	1.88687e+09	6.07989e+09	2.6088e+08	4.96356e+09	4.24688e+09
TRUE		C29 H25 N7 O9	Full match	No results	No results	No results	-0.91	615.171	616.178	9.152	0	0		DDA for preferred ion	[M+H]+1	3.06641e+08	2.76224e+06	1.54864e+07	6.35694e+08	8.4674e+08	1.71469e+09	2.97558e+09	8.85705e+08	2.44964e+09	2.50509e+08	6.77994e+09	1.01534e+10	6.57915e+09	4.76081e+09	2.59906e+09	5.75953e+09	6.36413e+09	2.75446e+09	6.83837e+09	140643	146389	154793	1.19791e+09	1.08462e+09	1.09087e+09	1.08097e+09	1.22845e+09	1.37301e+09	1.2668e+09	3.48593e+09	1.66987e+08	1.50405e+09	2.65922e+09	1.26315e+09
TRUE	Platelet-activating factor	C26 H54 N O7 P	Full match	No results	No results	Full match	1.95	523.365	524.372	12.081	4	0		DDA for preferred ion	[M+H]+1	4.29587e+09	3.06954e+09	5.39071e+09	2.15633e+09	9.13462e+08	1.77418e+09	1.52159e+09	3.87541e+09	2.30766e+09	4.13869e+09	2.84146e+09	2.44547e+09	2.65513e+09	1.86088e+09	1.24182e+09	1.48385e+09	2.35062e+09	1.43894e+09	1.24159e+09	333938	322996	346012	4.06977e+08	3.27073e+08	2.84997e+08	2.87479e+08	2.57174e+08	3.31273e+08	2.34722e+08	3.5197e+09	5.40752e+09	3.4796e+09	6.218e+09	5.1293e+09
TRUE	(7R,18Z)-4,7-Dihydroxy-N,N,N-trimethyl-10-oxo-3,5,9-trioxa-4-phosphaheptacos-18-en-1-aminium 4-oxide	C26 H53 N O7 P	No results	No results	No results	Full match	-3.45	522.354	523.362	12.061	2	0		No MS2	[M+H]+1	4.29587e+09	2.32882e+07	5.39071e+09	2.15633e+09	9.13462e+08	1.77418e+09	1.71086e+07	3.82966e+09	1.93886e+07	4.13869e+09	3.50123e+07	2.44547e+09	2.65513e+09	1.86088e+09	3.53686e+07	1.48385e+09	2.35062e+09	1.43894e+09	1.24159e+09	1.55821e+07	1.6773e+07	2.03463e+07	4.06977e+08	3.27073e+08	2.84997e+08	2.87479e+08	2.57174e+08	3.31273e+08	2.31782e+08	3.33688e+07	5.40752e+09	3.4796e+09	2.16396e+07	2.06835e+07
TRUE	(7R,18Z)-4,7-Dihydroxy-N,N,N-trimethyl-10-oxo-3,5,9-trioxa-4-phosphaheptacos-18-en-1-aminium 4-oxide	C26 H53 N O7 P	No results	No results	No results	Full match	-3.18	522.354	523.362	12.261	2	0		No MS2	[M+H]+1	4.29587e+09	1.71738e+07	2.73782e+08	2.22454e+09	9.41016e+08	8.97477e+07	1.57464e+09	3.87541e+09	1.05724e+08	4.13869e+09	2.84146e+09	1.39018e+07	2.71691e+09	1.9414e+09	3.17757e+07	1.18287e+07	2.35558e+09	6.99912e+07	1.27562e+09	584187	495471	592554	1.63716e+07	6.74741e+06	2.85458e+08	1.24558e+07	1.54399e+07	3.42229e+08	2.43906e+08	3.5197e+09	5.40752e+09	2.43892e+07	6.218e+09	5.1293e+09
TRUE	L-Phenylalanine	C9 H11 N O2	Full match	Full match	Full match	Full match	1.87	165.079	166.087	1.743	17	1	9.9	DDA for preferred ion	[M+H]+1	4.58981e+09	4.76483e+09	3.57077e+09	2.66882e+09	3.15765e+09	2.48316e+09	2.24288e+09	5.10446e+09	5.93049e+09	5.06421e+09	9.58655e+08	1.67577e+09	6.11278e+08	2.12501e+09	1.42804e+09	1.53725e+09	1.20747e+09	1.73782e+09	9.08958e+08	1.14214e+06	1.07685e+06	1.05887e+06	4.99126e+08	6.2308e+08	5.65793e+08	4.41201e+08	3.41888e+08	5.01384e+08	4.89075e+08	2.34517e+09	9.88213e+09	1.37272e+09	7.72016e+09	7.74191e+09
TRUE		C43 H76 N5 O4 P	Full match	No results	No results	No match	0.19	757.564	758.571	14.454	63	0		No MS2	[M+H]+1	2.12732e+07	6.62909e+09	4.06272e+09	5.15398e+09	5.7041e+09	2.44511e+07	5.75994e+09	6.11501e+09	7.86241e+09	4.72277e+09	5.42843e+07	9.29361e+09	8.56074e+09	8.99699e+09	7.56473e+09	4.15828e+07	8.31881e+09	6.67985e+09	5.81928e+09	1.07564e+06	969376	1.01645e+06	2.76328e+09	1.88429e+07	2.89998e+07	4.43584e+07	3.78419e+07	3.87824e+07	6.17262e+07	5.85358e+09	3.37533e+07	7.03043e+09	3.60881e+09	6.45415e+09
TRUE		C74 H119 N4 O18 P	Full match	No results	No results	No match	-0.09	1382.83	692.42	8.927	2	0		DDA for other ion	[M+2H]+2	1.03298e+08	1.806e+08	6.6912e+06	1.18045e+07	9.71627e+06	3.5854e+07	6.65615e+06	2.62878e+07	1.2393e+07	3.09309e+07	6.60712e+08	2.3878e+08	1.59892e+07	1.15403e+08	1.90221e+07	1.21441e+09	1.51034e+07	2.437e+07	6.01473e+07	5.13912e+06	3.53014e+06	4.64251e+06	6.70292e+07	1.09161e+08	7.39447e+07	3.84158e+07	6.42315e+07	7.42429e+07	6.64173e+07	337908	2.33231e+07	1.24818e+07	3.98446e+08	1.38638e+09
TRUE		C70 H122 N7 O12 P3 S	Full match	No results	No results	No results	0.1	1377.81	689.912	8.922	0	0		DDA for other ion	[M+2H]+2	1.03298e+08	1.77163e+08	7.65414e+06	1.18045e+07	9.71627e+06	3.5854e+07	6.65615e+06	2.62878e+07	1.2393e+07	3.09309e+07	6.60712e+08	2.3878e+08	2.44133e+07	1.15403e+08	1.90221e+07	1.21441e+09	1.51034e+07	2.437e+07	6.01473e+07	3.37857e+06	5.7744e+06	7.13139e+06	6.70292e+07	1.09161e+08	7.39447e+07	5.22516e+07	6.42315e+07	7.42429e+07	6.74209e+07	6.16997e+06	2.33231e+07	1.86586e+07	3.98446e+08	1.38638e+09
TRUE		C43 H76 N5 O4 P	Full match	No results	No results	No match	0.32	757.564	758.571	14.173	63	0		No MS2	[M+H]+1	1.36153e+07	2.76288e+08	5.84731e+08	8.98899e+08	7.93351e+08	1.37306e+07	3.12734e+08	9.03245e+08	1.23487e+09	7.49613e+08	7.57103e+07	1.54376e+08	2.10588e+09	3.77993e+07	1.60168e+09	2.69225e+07	3.1292e+08	1.9747e+09	9.58587e+08	1.45296e+06	1.03527e+06	1.15551e+06	2.47769e+06	9.70339e+06	1.81769e+07	1.52965e+07	1.47525e+07	1.77961e+07	9.54427e+07	1.48755e+09	1.43824e+07	2.14639e+09	9.80525e+08	1.97529e+09
TRUE	Dodecyl sulfate	C12 H26 O4 S	Full match	Full match	No results	No results	0.12	266.155	265.148	12.773	0	2	9.9	DDA for preferred ion	[M-H]-1	1.12904e+09	7.92315e+08	6.73873e+08	3.72786e+08	3.67618e+08	7.97333e+08	3.56627e+08	3.66858e+08	4.20828e+08	3.37537e+08	2.6682e+09	2.11981e+09	1.69724e+09	7.00266e+08	6.16371e+08	2.54023e+09	1.59165e+06	7.77552e+08	1.08674e+09	3.79022e+08	3.62101e+08	3.46414e+08	4.28286e+08	4.75423e+08	4.05908e+08	5.1626e+08	4.73025e+08	4.75589e+08	4.92985e+08	1.21871e+09	4.0648e+09	1.20913e+09	1.48538e+09	1.31692e+09
TRUE	Lysolecithin	C24 H50 N O7 P	Full match	No results	No results	Full match	2.01	495.333	496.341	11.314	6	0		DDA for preferred ion	[M+H]+1	3.94794e+09	4.70767e+09	4.8686e+09	2.5342e+09	2.43417e+09	1.99417e+09	2.87449e+09	3.41863e+09	3.45177e+09	4.97784e+09	4.47415e+09	2.44052e+09	3.09548e+09	1.96718e+09	7.51304e+08	1.69601e+09	2.53236e+09	2.1801e+09	1.31841e+09	459608	494821	553231	5.67573e+08	5.81406e+08	4.62965e+08	6.62426e+08	5.0171e+08	5.76757e+08	6.16632e+08	4.58567e+09	5.88661e+09	4.71292e+09	5.21339e+09	5.75484e+09
TRUE	1-palmitoyl-2-[(9Z,12Z,15Z)-octadecatrienoyl]-sn-glycero-3-phosphocholine	C42 H78 N O8 P	Full match	No results	No results	Full match	2.03	755.548	756.555	12.595	48	0		No MS2	[M+H]+1	2.0658e+07	9.95519e+08	6.51827e+09	2.61098e+08	2.43257e+08	3.53465e+09	2.92065e+08	8.8875e+09	5.91735e+09	1.24248e+08	2.06797e+09	8.08136e+08	3.5416e+08	4.73318e+08	3.35887e+08	5.22075e+09	8.7739e+08	3.70404e+09	1.11245e+08	1.21114e+06	1.18151e+06	1.01847e+06	9.68076e+07	2.88788e+09	7.28655e+09	4.27086e+09	4.25657e+09	3.04183e+09	4.13155e+08	2.37818e+08	1.37999e+07	9.12767e+08	4.17865e+08	4.76776e+08
TRUE	C14-Carnitine	C21 H41 N O4	Full match	No results	No results	Full match	1.59	371.304	372.311	9.509	3	0		No MS2	[M+H]+1	5.5514e+08	6.46508e+08	7.4668e+08	2.89815e+08	8.78295e+09	2.16585e+08	3.6502e+08	3.41758e+08	6.39603e+08	4.62417e+08	2.37377e+08	1.4822e+08	9.02507e+07	7.78948e+07	3.13767e+07	7.45861e+07	4.06702e+07	6.02877e+07	1.36943e+08	143982	164772	150942	7.1249e+07	7.04977e+07	6.677e+07	6.55795e+07	6.86805e+07	7.02569e+07	7.06658e+07	2.50547e+08	1.2124e+09	9.1362e+08	1.20978e+09	1.55005e+09
TRUE	PC(18:1/0:0)	C26 H52 N O7 P	Full match	No results	No results	Full match	2.18	521.349	522.357	11.47	10	0		DDA for preferred ion	[M+H]+1	2.91503e+09	3.25799e+09	2.43271e+09	1.04817e+09	1.12077e+09	1.37986e+09	1.3101e+09	2.0082e+09	1.78488e+09	2.92887e+09	1.77896e+09	1.57459e+09	9.41498e+08	8.32197e+08	2.7433e+08	8.92808e+08	1.15204e+09	6.30203e+08	4.10014e+08	434643	459475	454618	1.81776e+08	2.00982e+08	1.85163e+08	1.81586e+08	2.80624e+08	2.13199e+08	2.26951e+08	2.19473e+09	4.34902e+09	3.35126e+09	4.02462e+09	3.76995e+09
TRUE		C39 H77 N9 O3 P2	Full match	No results	No results	No match	-1.83	781.561	782.568	12.382	62	0		No MS2	[M+H]+1	9.80721e+07	1.83521e+06	7.66399e+08	9.19185e+08	2.88445e+07	1.85341e+07	3.14759e+06	1.52401e+09	9.46157e+08	1.11383e+09	2.92056e+07	6.10227e+06	9.60119e+08	2.53853e+09	8.56275e+08	1.1668e+09	9.13886e+06	7.4393e+08	1.34997e+09	928085	880280	879750	6.95972e+08	1.51664e+07	5.17502e+08	1.09017e+09	1.0706e+09	9.22132e+08	7.04308e+08	1.1051e+09	1.32067e+09	7.52255e+06	5.43684e+08	1.12381e+09
TRUE		C65 H95 N8 O9 P	Full match	No results	No results	No results	-0.54	1162.7	582.355	8.86	0	0		DDA for other ion	[M+2H]+2	1.04724e+08	1.36411e+08	1.84293e+07	1.36446e+07	1.35488e+07	3.80373e+07	1.93238e+07	4.59271e+07	1.90962e+07	2.86241e+07	5.22889e+08	2.35097e+08	4.34591e+07	9.33553e+07	2.75788e+07	6.16889e+08	3.17424e+07	3.94899e+07	6.39739e+07	1.15794e+07	1.75115e+07	1.364e+07	7.55001e+07	8.15042e+07	8.36682e+07	6.52815e+07	7.11056e+07	8.01375e+07	6.74776e+07	1.81366e+07	3.44568e+07	2.24493e+07	2.67229e+08	1.08991e+09
TRUE		C36 H60 N4 O7	Full match	No results	No results	No results	0.04	660.446	683.435	10.877	0	0		DDA for preferred ion	[M+Na]+1	2.898e+09	1.46897e+09	2.31099e+09	2.09032e+08	5.96814e+08	1.97232e+09	2.85866e+08	1.03202e+09	1.25868e+09	6.88847e+08	4.22527e+09	3.13797e+09	4.73747e+09	5.96789e+08	2.21875e+09	6.70072e+09	4.40971e+08	1.55556e+09	2.83107e+09	6.97641e+06	6.7725e+06	6.19482e+06	6.24033e+08	6.76573e+08	6.06524e+08	6.10387e+08	6.53777e+08	7.33903e+08	6.01736e+08	2.64029e+09	1.27456e+09	3.49475e+09	2.22334e+09	3.1828e+09
TRUE		C33 H58 N6 O9	Full match	No results	No results	No results	3.07	682.429	683.436	10.859	0	0		DDA for preferred ion	[M+H]+1	2.898e+09	1.46897e+09	2.31099e+09	2.09032e+08	5.96814e+08	1.97232e+09	2.85866e+08	1.03202e+09	1.25868e+09	6.88847e+08	1.7605e+08	3.13797e+09	4.73747e+09	5.96789e+08	2.21875e+09	6.70072e+09	4.40971e+08	1.55556e+09	2.83107e+09	6.97641e+06	6.7725e+06	6.19482e+06	6.24033e+08	6.76573e+08	6.06524e+08	6.10387e+08	6.53777e+08	7.33903e+08	6.01736e+08	2.64029e+09	1.27456e+09	9.39045e+07	2.22334e+09	3.1828e+09
TRUE		C45 H76 N5 O4 P	Full match	No results	No results	No match	0.11	781.564	782.571	14.188	62	0		No MS2	[M+H]+1	4.20114e+07	4.36276e+09	2.80401e+09	7.72565e+09	2.56046e+09	4.27068e+07	4.61247e+09	2.8218e+09	3.9015e+09	4.46993e+09	1.73908e+08	3.62767e+09	4.11279e+09	2.75067e+09	2.70296e+09	6.20771e+07	3.30122e+09	2.10608e+09	3.19629e+09	1.4993e+06	985768	1.19236e+06	1.49334e+09	3.14385e+07	5.89108e+07	2.97562e+07	3.45632e+07	4.5606e+07	1.97872e+07	2.37338e+09	4.12857e+07	4.19766e+09	1.69484e+09	4.28849e+09
TRUE	intercept	C33 H60 O10	Full match	No results	No results	Full match	2.22	616.42	639.409	10.878	1	0		DDA for preferred ion	[M+Na]+1	2.92786e+09	1.43892e+09	2.14954e+09	2.34368e+08	6.48026e+08	1.88681e+09	3.11964e+08	9.54326e+08	1.12834e+09	7.06496e+08	3.74465e+09	2.81926e+09	4.58668e+09	6.85044e+08	2.57039e+09	6.57161e+09	5.12239e+08	1.36838e+09	3.21372e+09	9.11766e+06	9.97989e+06	8.69806e+06	6.42559e+08	6.79166e+08	6.17031e+08	6.16221e+08	6.64441e+08	7.31266e+08	6.26971e+08	2.7172e+09	1.09458e+09	3.54748e+09	2.14528e+09	2.80025e+09
TRUE		C30 H55 N8 O5 P	Full match	No results	No results	No results	-1.83	638.402	639.409	10.857	0	0		DDA for preferred ion	[M+H]+1	2.92786e+09	1.43892e+09	2.14954e+09	1.07482e+07	6.48026e+08	1.88681e+09	3.11964e+08	9.54326e+08	1.12834e+09	7.06496e+08	1.59328e+08	2.81926e+09	4.58668e+09	6.85044e+08	2.57039e+09	6.57161e+09	5.12239e+08	1.36838e+09	3.21372e+09	9.11766e+06	9.97989e+06	8.69806e+06	6.42559e+08	6.79166e+08	6.17031e+08	6.16221e+08	6.64441e+08	7.31266e+08	6.26971e+08	2.7172e+09	1.09458e+09	9.66885e+07	2.14528e+09	2.80025e+09
TRUE		C40 H75 N6 O2 P	Full match	No results	No results	No match	0.25	702.569	703.576	12.798	7	0		No MS2	[M+H]+1	2.07398e+06	4.13531e+09	3.29602e+09	3.15353e+09	3.67088e+09	1.53935e+06	4.16845e+09	2.61717e+09	3.36513e+09	3.25989e+09	4.1811e+06	4.74174e+09	5.05842e+09	4.54342e+09	4.68119e+09	2.01773e+06	4.28055e+09	2.87424e+09	2.50122e+09	1.25904e+06	1.14343e+06	1.34372e+06	1.48816e+09	1.47404e+06	3.85298e+06	3.02554e+06	2.84283e+06	4.96758e+06	2.61233e+06	3.16453e+09	5.26995e+06	4.55597e+09	2.42481e+09	4.57393e+09
TRUE		C43 H78 N5 O4 P	Full match	No results	No results	No match	0.46	759.579	760.587	12.76	52	0		No MS2	[M+H]+1	9.58385e+08	2.25872e+07	3.79779e+09	4.55987e+09	3.20953e+09	3.80528e+09	1.4299e+07	5.57046e+09	4.61295e+09	4.6045e+09	1.36096e+09	2.85708e+07	6.81793e+08	2.8016e+09	2.36403e+09	2.46412e+09	1.9495e+07	2.16005e+09	2.21693e+09	1.14796e+06	1.04255e+06	1.22518e+06	1.97265e+09	2.51653e+09	7.28655e+09	2.29264e+09	2.45395e+09	1.82182e+09	2.3621e+08	2.46294e+09	1.41419e+09	1.6694e+07	2.99322e+09	2.65816e+09
TRUE		C16 H37 N3 O4	Full match	No results	No results	No results	-1.48	335.278	734.572	11.743	0	0		No MS2	[2M+ACN+Na]+1	2.91912e+08	1.05793e+07	5.44974e+08	3.87804e+08	1.54222e+08	1.82475e+08	4.76771e+06	1.41277e+09	4.51506e+08	1.02297e+09	2.31872e+08	6.81509e+06	1.03268e+09	2.41974e+09	2.52061e+09	9.46248e+08	9.98491e+06	1.13144e+09	9.51262e+08	942939	908152	902362	2.95498e+08	3.06862e+07	6.32984e+08	3.18233e+08	1.1958e+09	5.57673e+08	1.82684e+08	7.39992e+08	6.90924e+08	3.85147e+07	1.33925e+09	1.00205e+09
TRUE		C36 H69 N2 O9 P	Full match	No results	No results	No results	-2.09	704.473	727.462	10.874	0	0		DDA for preferred ion	[M+Na]+1	2.53116e+09	1.46019e+09	2.11721e+09	1.64985e+08	4.93986e+08	1.80367e+09	2.42079e+08	9.98177e+08	1.33945e+09	5.93937e+08	3.87417e+09	3.10776e+09	4.39917e+09	4.97149e+08	1.64581e+09	5.76231e+09	3.19777e+08	1.54313e+09	2.21808e+09	4.51204e+06	3.10628e+06	3.21438e+06	5.49397e+08	5.83141e+08	5.21302e+08	5.32503e+08	5.79762e+08	6.27137e+08	5.32914e+08	2.22614e+09	1.34819e+09	2.89075e+09	1.9468e+09	2.96989e+09
TRUE		C35 H62 N6 O10	Full match	No results	No results	No results	2.65	726.455	727.462	10.845	0	0		DDA for preferred ion	[M+H]+1	2.53116e+09	1.46019e+09	2.11721e+09	1.64985e+08	4.93986e+08	1.80367e+09	2.42079e+08	9.98177e+08	1.33945e+09	5.93937e+08	3.87417e+09	3.10776e+09	4.39917e+09	4.97149e+08	1.64581e+09	5.76231e+09	3.19777e+08	1.54313e+09	2.21808e+09	4.25117e+06	3.10628e+06	3.21438e+06	5.49397e+08	5.83141e+08	5.21302e+08	5.32503e+08	5.79762e+08	6.27137e+08	5.32914e+08	2.22614e+09	1.34819e+09	1.0821e+08	1.9468e+09	2.96989e+09
TRUE	Palmitoylcarnitine	C23 H45 N O4	Full match	No results	No results	Full match	1.83	399.336	400.343	9.796	3	0		No MS2	[M+H]+1	3.01654e+09	6.49042e+09	3.66026e+09	1.3148e+09	4.98602e+09	8.9674e+08	1.56855e+09	1.45633e+09	3.58571e+09	4.07894e+09	1.25193e+09	1.12507e+09	5.64478e+08	4.1188e+08	1.73583e+08	4.13189e+08	2.87924e+08	3.90237e+08	5.87861e+08	159232	177709	187873	2.26967e+08	2.30713e+08	2.31559e+08	2.36524e+08	2.38376e+08	2.59955e+08	2.82369e+08	1.44792e+09	3.97799e+09	3.97682e+09	4.48687e+09	6.98969e+09
TRUE	Erucamide	C22 H43 N O	Full match	No results	No results	Full match	1.93	337.335	338.342	13.487	1	0		DDA for other ion	[M+H]+1	7.95961e+06	6.81286e+07	1.65075e+08	5.17211e+07	1.96658e+08	8.09601e+07	8.14032e+07	4.14419e+07	4.20818e+07	4.2282e+07	6.60904e+07	2.35378e+08	2.98482e+08	7.40846e+07	7.45884e+07	8.68108e+07	7.95526e+07	5.56717e+07	7.2814e+07	6.13142e+07	6.08843e+07	6.36685e+07	4.12823e+07	4.321e+07	3.83798e+07	3.86174e+07	3.76718e+07	3.81658e+07	3.2392e+07	9.08675e+07	4.05733e+07	7.29191e+07	6.38343e+07	7.87518e+06
TRUE	Oleoylcarnitine	C25 H47 N O4	Full match	No results	No results	Full match	2.08	425.351	426.359	9.869	7	0		DDA for preferred ion	[M+H]+1	2.91738e+09	2.21312e+09	1.91432e+09	6.7357e+08	4.82824e+09	6.23885e+08	1.17401e+09	9.34654e+08	1.86597e+09	1.20151e+09	1.24058e+09	8.60413e+08	7.23418e+08	2.68386e+08	1.39998e+08	3.21306e+08	2.45899e+08	2.27215e+08	4.28012e+08	164398	189464	184820	1.58248e+08	1.43532e+08	1.60291e+08	1.69234e+08	1.49652e+08	1.60809e+08	2.0906e+08	1.73348e+09	2.21492e+09	3.11024e+09	3.61487e+09	4.83341e+09
TRUE		C24 H55 N4 O2 P S	Full match	No results	No results	No results	3.32	494.38	573.401	10.869	0	0		DDA for other ion	[M+DMSO+H]+1	5.72601e+08	2.53218e+08	3.14775e+08	2.17268e+07	6.65897e+07	2.39729e+08	2.96322e+07	1.58028e+08	1.50083e+08	7.16177e+07	1.17368e+09	1.35766e+09	1.71862e+09	8.7247e+07	5.25382e+08	3.99615e+09	6.25133e+07	2.16977e+08	8.45462e+08	1.08818e+06	478084	423508	5.75567e+07	6.06802e+07	5.9281e+07	5.20499e+07	5.94165e+07	6.71305e+07	5.96997e+07	5.85144e+08	1.84296e+08	8.29265e+08	3.26848e+08	5.03226e+08
TRUE	Chlorhexidine	C22 H30 Cl2 N10	Full match	Full match	No results	Full match	2.24	504.204	253.109	8.399	1	1	83.5	DDA for preferred ion	[M+2H]+2	1.12185e+08	1.43107e+08	4.90733e+07	1.0536e+08	9.37162e+07	3.30246e+08	1.70946e+08	6.01125e+07	1.46834e+08	5.82636e+07	6.31602e+08	7.34028e+08	2.1149e+08	1.66302e+08	3.68334e+08	1.37893e+08	4.02823e+08	2.38904e+08	2.95652e+08	54353.2	52562.1	50920.3	8.89742e+07	8.24044e+07	7.61041e+07	6.91459e+07	8.59751e+07	8.40322e+07	6.79441e+07	6.87915e+09	1.13833e+08	2.38171e+07	3.04172e+08	1.04117e+08
TRUE	N-(tert-Butoxycarbonyl)-L-leucine	C11 H21 N O4	Full match	No results	No results	Full match	1.97	231.148	232.155	1.076	5	0		DDA for preferred ion	[M+H]+1	1.05748e+09	4.35397e+08	4.16994e+08	8.37563e+08	3.57536e+08	5.68229e+08	3.2389e+08	2.83152e+08	2.38042e+09	3.05316e+09	6.79951e+07	5.32086e+07	5.03035e+07	5.96647e+07	1.93682e+07	6.5611e+07	2.54146e+07	3.82894e+07	5.64605e+08	73217.9	86359.3	72517.3	1.5486e+08	5.22803e+07	1.51664e+08	2.13024e+08	6.54071e+07	2.00803e+08	1.29963e+08	1.21709e+08	1.47562e+09	5.49231e+08	1.47643e+09	3.08556e+09
TRUE	(2S,3R,4E)-3-Hydroxy-2-(stearoylamino)-4-octadecen-1-yl 2-acetamido-2-deoxy-β-D-galactopyranosyl-(1->4)-[(6R)-5-acetamido-3,5-dideoxy-6-[(1R,2R)-1,2,3-trihydroxypropyl]-β-L-threo-hex-2-ulopyrano nosyl-(2->3)]-β-D-galactopyranosyl-(1->4)-β-D-glucopyranoside	C67 H121 N3 O26	No results	No results	No results	Full match	2.91	1383.83	692.921	8.932	3	0		DDA for other ion	[M+2H]+2	7.02182e+07	1.25984e+08	5.55551e+06	4.9576e+06	7.33907e+06	2.34386e+07	4.59224e+06	1.78508e+07	9.72305e+06	2.13447e+07	4.63058e+08	1.51108e+08	1.33299e+07	7.99889e+07	1.54935e+07	8.01574e+08	9.04232e+06	1.50442e+07	3.87669e+07	2.65475e+06	2.06988e+06	2.71967e+06	4.41484e+07	5.73772e+07	4.88859e+07	2.91775e+07	4.17254e+07	5.2929e+07	4.49298e+07	1.66512e+06	1.89225e+07	8.07796e+06	2.65441e+08	9.71348e+08
TRUE	L-Norleucine	C6 H13 N O2	Full match	Full match	Partial match	Not the top hit	2.34	131.095	132.102	1.143	17	4	10	DDA for preferred ion	[M+H]+1	3.46141e+09	4.4514e+09	4.17e+09	2.6485e+09	2.55164e+09	2.42548e+09	1.62033e+09	3.39825e+09	3.28512e+09	3.02953e+09	1.07004e+09	1.60666e+09	7.23911e+08	1.89466e+09	1.15948e+09	1.27989e+09	1.16855e+09	1.56348e+09	9.56005e+08	2.62076e+06	2.0371e+06	3.3451e+06	7.17515e+08	7.37706e+08	7.63314e+08	7.78082e+08	8.15596e+08	8.68365e+08	6.25091e+08	1.8954e+09	5.80069e+09	2.01363e+09	5.21946e+09	4.75059e+09
TRUE		C19 H36 N6 O2	Full match	No results	No results	No match	2.65	380.291	381.298	12.271	15	0		DDA for preferred ion	[M+H]+1	3.1305e+09	3.41713e+09	2.30882e+09	1.84591e+09	1.1785e+09	2.73624e+09	2.1876e+09	3.19759e+09	3.3128e+09	2.18209e+09	3.56339e+09	4.55745e+09	4.50412e+09	2.69854e+09	4.11541e+09	3.74638e+09	3.51926e+09	5.75439e+09	3.77353e+09	8.14593e+07	8.80577e+07	7.93036e+07	1.78453e+09	1.78003e+09	1.51353e+09	1.58456e+09	1.7119e+09	1.53962e+09	1.28885e+09	3.01578e+09	3.32621e+09	2.40913e+09	2.51506e+09	2.22444e+09
TRUE		C89 H137 N8 O12 P3	Full match	No results	No results	No match	0.03	1602.96	535.326	8.986	3	0		DDA for other ion	[M+3H]+3	1.65612e+08	3.11781e+08	1.09491e+07	1.44887e+07	1.39843e+07	2.54053e+06	1.29629e+07	5.02755e+07	1.67035e+07	4.19346e+07	9.11993e+08	3.08549e+08	759515	2.17521e+08	4.88304e+07	1.73798e+09	1.77114e+07	5.2141e+07	1.0836e+08	6.317e+06	4.72991e+06	5.0114e+06	1.19665e+08	1.21842e+08	1.19591e+08	9.44393e+07	1.10048e+08	1.52226e+08	1.30469e+08	8.42794e+06	2.91815e+07	2.31562e+07	5.29943e+08	1.72094e+09
TRUE		C86 H153 N10 O11 P3 S3	Full match	No results	No results	No match	0.3	1691.01	564.677	9.011	3	0		DDA for other ion	[M+3H]+3	1.24858e+08	1.81185e+08	7.49568e+06	1.04355e+07	1.1378e+07	4.18622e+07	9.70895e+06	3.4429e+07	1.58081e+07	3.39962e+07	6.66313e+08	2.40706e+08	1.83126e+07	1.64987e+08	4.91429e+07	1.58435e+09	1.85708e+07	4.27626e+07	8.57325e+07	3.9441e+06	3.39799e+06	4.06669e+06	8.33743e+07	9.27838e+07	7.70495e+07	8.97853e+07	8.92089e+07	9.00573e+07	1.05147e+08	4.77445e+06	2.19346e+07	2.27356e+07	4.16529e+08	1.29642e+09
TRUE		C87 H153 N10 O17 P3 S	Full match	No results	No results	No results	0.81	1735.04	579.353	9.018	0	0		DDA for other ion	[M+3H]+3	7.86845e+07	1.58564e+08	5.6524e+06	6.778e+06	316225	2.64013e+07	7.86129e+06	2.83029e+07	1.10717e+07	2.10527e+07	5.42989e+08	2.07111e+08	1.12606e+07	1.38536e+08	3.9608e+07	1.25032e+09	1.56789e+07	3.77225e+07	6.78015e+07	4.55446e+06	4.40459e+06	4.50665e+06	6.72555e+07	7.48983e+07	6.58935e+07	5.8353e+07	7.77481e+07	7.98745e+07	7.47978e+07	480229	1.75317e+07	1.65008e+07	3.04552e+08	1.12362e+09
TRUE		C89 H144 N6 O16 P2 S	Full match	No results	No results	No match	0.35	1646.98	550.002	9.003	8	0		DDA for other ion	[M+3H]+3	1.56203e+08	2.57458e+08	8.09931e+06	1.01125e+07	1.04913e+07	4.11658e+07	1.51995e+07	3.65351e+07	1.31629e+07	3.62632e+07	7.31081e+08	2.76211e+08	1.72471e+07	2.17091e+08	4.76602e+07	1.50685e+09	2.04629e+07	5.64745e+07	8.79297e+07	4.5879e+06	8.79112e+06	5.03096e+06	9.57134e+07	9.79938e+07	1.16617e+08	1.01651e+08	1.15357e+08	1.1811e+08	1.07391e+08	8.93125e+06	2.61184e+07	3.37598e+07	4.33752e+08	1.84834e+09
TRUE		C40 H77 N2 O11 P	Full match	No results	No results	No results	-1.79	792.525	793.532	10.867	0	0		DDA for other ion	[M+H]+1	3.58754e+08	2.88493e+08	2.75546e+08	9.78566e+06	3.11162e+07	1.92235e+08	1.30087e+07	1.71422e+08	2.45565e+08	3.97962e+07	1.06343e+09	1.87335e+09	1.59971e+09	3.63847e+07	1.83987e+08	2.84497e+09	1.80143e+07	3.4463e+08	3.36952e+08	369333	458896	406511	3.58209e+07	3.42822e+07	3.59377e+07	3.49302e+07	4.04953e+07	4.46059e+07	3.39141e+07	3.31368e+08	3.02919e+08	4.80598e+08	2.18535e+08	4.66548e+08
TRUE	Erucamide	C22 H43 N O	Full match	No results	No results	Full match	2.12	337.335	338.342	13.211	1	0		DDA for other ion	[M+H]+1	4.03077e+09	2.29144e+09	2.56658e+09	3.38938e+09	2.47068e+09	4.28947e+09	3.52466e+09	2.29653e+09	2.08316e+09	1.97269e+09	4.67773e+09	3.17737e+09	3.59009e+09	2.76971e+09	2.31721e+09	5.26895e+09	4.0037e+09	2.64576e+09	3.36239e+09	2.62378e+08	2.61556e+08	2.60046e+08	1.10135e+09	1.58574e+09	1.35323e+09	1.30517e+09	1.48244e+09	1.28609e+09	1.20882e+09	3.61227e+09	4.16229e+09	1.77122e+09	2.56227e+09	2.46606e+09
TRUE	Testosterone sulfate	C19 H28 O5 S	Full match	Full match	No results	Full match	0.02	368.166	367.158	9.627	5	1	9.9	DDA for preferred ion	[M-H]-1	2.05704e+08	1.59792e+07	5.12184e+07	6.3852e+07	6.17368e+09	2.421e+07	1.00454e+07	6.24866e+07	2.57038e+08	4.6605e+07	1.1227e+08	1.99907e+07	3.15283e+07	1.45713e+08	1.9341e+07	3.80349e+07	1.22025e+07	1.03496e+08	3.99079e+07	58811.4	58721.1	51449.5	3.30031e+07	3.30635e+07	3.06786e+07	3.53876e+07	3.02035e+07	3.46518e+07	3.65533e+07	2.53574e+08	4.18658e+08	4.47552e+07	1.61525e+08	8.34833e+07
TRUE	4-Undecylbenzenesulfonic acid	C17 H28 O3 S	Full match	No results	No results	Full match	1.31	312.176	311.169	14.025	1	0		DDA for preferred ion	[M-H]-1	7.21405e+08	8.50321e+08	4.32889e+08	4.22427e+08	5.41336e+08	7.79877e+08	5.91129e+08	6.73744e+08	7.5262e+08	4.50176e+08	1.03762e+09	6.06999e+09	8.59776e+08	1.1241e+09	7.30708e+08	1.14463e+09	7.54579e+08	6.5143e+08	6.71538e+08	8.48504e+07	8.78998e+07	8.70706e+07	2.01276e+08	2.64659e+08	2.47465e+08	3.56073e+07	2.32183e+08	2.63714e+08	2.77383e+08	3.2975e+09	2.36549e+09	4.75565e+08	8.93971e+08	6.38172e+08
TRUE		C24 H48 N7 O5 P	Full match	No results	No results	No match	3.23	545.347	546.354	12.076	2	0		DDA for preferred ion	[M+H]+1	3.33115e+09	2.2489e+09	3.75114e+09	1.48012e+09	5.59449e+08	1.37563e+09	1.06529e+09	2.92713e+09	2.28361e+09	3.04696e+09	2.37285e+09	1.50438e+09	2.14369e+09	1.37928e+09	8.60913e+08	8.84149e+08	1.45547e+09	1.11611e+09	7.6328e+08	354941	343310	367774	1.63726e+08	1.50108e+08	1.54423e+08	1.42798e+08	1.44004e+08	1.69028e+08	1.27931e+08	2.89584e+09	4.07109e+09	2.70771e+09	4.41096e+09	3.30051e+09
TRUE	Colfosceril palmitate	C40 H80 N O8 P	Full match	No results	No results	Full match	2.26	733.564	734.571	11.729	39	0		No MS2	[M+H]+1	2.91912e+08	1.05793e+07	5.58309e+08	2.79637e+08	1.54222e+08	8.53761e+07	4.04984e+06	1.41277e+09	4.51506e+08	1.02297e+09	2.31872e+08	3.52084e+06	1.03268e+09	2.9427e+09	2.52061e+09	9.46248e+08	9.98491e+06	8.88129e+08	9.51262e+08	756037	728145	723503	2.95498e+08	3.06862e+07	3.61303e+08	3.18233e+08	1.1958e+09	4.07854e+08	1.20579e+08	7.39992e+08	6.90924e+08	3.85147e+07	1.33925e+09	1.00205e+09
TRUE		C32 H52 N4 O5	Full match	No results	No results	No results	0.08	572.394	595.383	10.878	0	0		DDA for preferred ion	[M+Na]+1	2.56118e+09	1.28757e+09	1.73078e+09	2.46114e+08	6.43556e+08	1.45801e+09	3.00436e+08	8.0831e+08	9.19613e+08	6.48254e+08	2.97377e+09	2.31068e+09	3.62437e+09	7.01259e+08	2.51514e+09	5.35505e+09	5.50617e+08	1.14724e+09	3.19413e+09	1.4365e+07	1.07513e+07	1.2507e+07	5.99931e+08	6.34078e+08	5.64684e+08	5.67891e+08	6.00586e+08	6.60471e+08	5.68509e+08	2.37499e+09	8.57354e+08	3.13669e+09	1.74111e+09	2.16335e+09
TRUE		C43 H78 N5 O4 P	Full match	No results	No results	No match	0.4	759.579	760.587	12.263	52	0		No MS2	[M+H]+1	3.11734e+07	1.91396e+07	1.7879e+08	3.80886e+08	1.34448e+08	1.1472e+08	2.09778e+07	1.01612e+09	3.34105e+08	3.66835e+08	1.32435e+08	3.91019e+07	8.81058e+08	3.44574e+09	1.7657e+09	1.81367e+09	3.55362e+07	1.70811e+09	1.62223e+09	556626	472096	564599	2.72082e+08	2.95162e+07	6.70775e+07	9.21734e+08	7.01028e+08	4.95943e+08	1.94382e+09	1.04222e+09	7.11411e+08	4.43389e+07	3.98857e+09	4.43124e+07
TRUE		C31 H75 N10 O5 P S	Full match	No results	No results	No match	-2.59	730.536	731.543	11.738	1	0		No MS2	[M+H]+1	1.4261e+06	3.73255e+07	1.18748e+08	3.63718e+07	3.53312e+07	1.17427e+06	1.0606e+07	3.20815e+07	1.19156e+07	6.82587e+07	1.89587e+06	3.62376e+07	8.21291e+07	9.20576e+07	6.03769e+07	1.37507e+06	7.65799e+07	5.41791e+07	2.27893e+07	730202	703263	698779	4.70435e+07	830841	759773	846982	869525	745415	920073	2.75728e+07	1.74334e+06	2.74357e+08	1.90574e+07	9.73022e+07
TRUE		C39 H75 N9 O3 P2	Full match	No results	No results	No match	-2.12	779.545	780.552	14.272	57	0		No MS2	[M+H]+1	3.34183e+07	4.36276e+09	1.44502e+08	5.49934e+09	2.56046e+09	3.29712e+07	4.57095e+09	1.71512e+09	3.83332e+09	4.4042e+09	1.73908e+08	3.49569e+09	2.09054e+09	2.28708e+09	2.04187e+09	9.40358e+06	2.65993e+09	2.00379e+09	3.05958e+07	983222	850142	1.08945e+06	1.49816e+09	3.14385e+07	4.51744e+07	2.36408e+07	2.62285e+07	3.67079e+07	1.45045e+07	2.34704e+09	3.23649e+07	4.06598e+09	1.51469e+09	4.20098e+09
TRUE		C85 H129 N8 O10 P3	Full match	No results	No results	No results	-0.19	1514.9	505.975	8.964	0	0		DDA for other ion	[M+3H]+3	1.67749e+08	3.04195e+08	1.18974e+07	1.35623e+07	1.37568e+07	5.1821e+07	1.57813e+07	4.99774e+07	1.62215e+07	4.60905e+07	8.33669e+08	3.5226e+08	2.58042e+07	2.19098e+08	4.52167e+07	1.49619e+09	1.89177e+07	5.66517e+07	1.00981e+08	8.23888e+06	4.03165e+06	5.06994e+06	1.19536e+08	1.24616e+08	1.26644e+08	7.27221e+07	1.21731e+08	1.34156e+08	1.27919e+08	1.47067e+07	2.96912e+07	2.54045e+07	5.07694e+08	1.7925e+09
TRUE	C18-Carnitine	C25 H49 N O4	Full match	No results	No results	Full match	1.68	427.367	428.374	10.097	2	0		DDA for preferred ion	[M+H]+1	3.14868e+09	3.61498e+09	2.26401e+09	1.4335e+09	5.44527e+08	7.96511e+08	9.1044e+08	1.15834e+09	1.93787e+09	1.62688e+09	4.61165e+08	2.15487e+08	1.17565e+08	1.64378e+08	7.73157e+07	1.26102e+08	1.38829e+08	7.97899e+07	2.03285e+08	230717	203516	213802	1.37937e+08	1.54203e+08	1.57001e+08	1.40791e+08	1.54132e+08	1.78409e+08	1.6057e+08	5.36144e+08	2.65028e+09	1.59284e+09	2.40514e+09	5.51653e+09
TRUE		C76 H134 N7 O15 P3 S	Full match	No results	No results	No results	-0.17	1509.89	755.951	8.957	0	0		DDA for other ion	[M+2H]+2	4.54969e+07	9.78843e+07	2.24993e+06	3.65734e+06	3.76123e+06	1.37517e+07	4.26025e+06	1.36201e+07	1.30804e+07	1.36798e+07	3.27918e+08	1.09692e+08	5.24486e+06	6.41102e+07	1.02909e+07	7.05137e+08	6.69289e+06	1.28395e+07	2.6414e+07	1.08019e+06	1.17935e+06	1.39332e+06	2.756e+07	5.29086e+07	3.38818e+07	1.90066e+07	2.86418e+07	4.32324e+07	2.86749e+07	2.65029e+06	1.13726e+07	6.11279e+06	1.84647e+08	8.02282e+08
TRUE		C87 H133 N8 O11 P3	Full match	No results	No results	No results	0.23	1558.93	520.651	8.98	0	0		DDA for other ion	[M+3H]+3	2.80233e+08	2.96379e+08	1.20583e+07	1.35599e+07	1.18811e+07	5.46618e+07	1.37061e+07	4.20381e+07	1.56322e+07	5.03476e+07	8.35498e+08	2.86677e+08	2.45381e+07	2.30541e+08	3.82162e+07	1.6701e+09	2.01854e+07	4.95837e+07	1.10273e+08	4.84602e+06	5.79769e+06	6.29715e+06	1.04434e+08	1.16968e+08	1.19693e+08	9.67101e+07	1.12438e+08	1.38463e+08	1.4765e+08	1.10888e+07	3.11447e+07	2.95016e+07	5.76809e+08	1.74092e+09
TRUE	1-[(9Z)-hexadecenoyl]-sn-glycero-3-phosphocholine	C24 H48 N O7 P	Full match	No results	No results	Full match	1.91	493.318	494.325	10.821	3	0		DDA for preferred ion	[M+H]+1	3.42573e+08	1.40219e+09	7.01421e+08	2.30954e+08	1.42675e+08	1.11214e+08	1.93636e+08	1.42728e+08	4.28995e+08	1.57857e+09	2.95234e+08	1.86761e+08	2.45917e+08	1.26094e+08	4.17739e+07	7.10116e+07	1.51798e+08	6.74409e+07	9.5906e+07	430947	478731	424082	3.85756e+07	4.2282e+07	4.02329e+07	4.01123e+07	3.95273e+07	4.98684e+07	4.07871e+07	4.47211e+08	1.1471e+09	9.55812e+08	1.25745e+09	1.44541e+09
TRUE		C36 H77 N10 O5 P	Full match	No results	No results	No results	0.99	760.582	761.59	11.894	0	0		No MS2	[M+H]+1	2.143e+07	4.52177e+06	9.13138e+06	2.35482e+08	1.33638e+07	5.70258e+07	3.72346e+06	5.40307e+06	1.45009e+07	9.43276e+06	1.96473e+07	4.79112e+06	4.11294e+06	1.09717e+07	1.09563e+07	1.67073e+07	6.68055e+06	9.01339e+06	7.92997e+06	841781	871983	827977	1.01044e+07	1.93502e+07	1.15608e+07	5.41676e+06	5.26065e+06	6.37376e+06	9.09112e+08	8.08637e+06	4.85235e+07	4.49805e+06	2.88089e+07	1.0509e+07
TRUE	DL-Tryptophan	C11 H12 N2 O2	Full match	Full match	Full match	Full match	2.12	204.09	188.071	4.469	12	3	87.6	DDA for preferred ion	[M+H-NH3]+1	1.41534e+09	1.78536e+09	1.03129e+09	6.5802e+08	7.00705e+08	6.61348e+08	1.32906e+08	5.82758e+08	8.70851e+08	8.1961e+08	6.65866e+07	2.49691e+08	7.59398e+07	3.69992e+08	1.38689e+08	2.39547e+08	1.8516e+08	2.93716e+08	1.53536e+08	345234	290736	271708	1.02637e+08	7.37252e+07	8.87213e+07	1.09346e+08	7.77177e+07	1.11217e+08	1.14732e+08	7.34331e+08	2.16591e+09	1.46933e+08	2.1963e+09	1.72273e+09
TRUE		C52 H94 N8 O18	Full match	No results	No results	No results	-0.09	1118.67	560.342	8.841	0	0		DDA for other ion	[M+2H]+2	8.56029e+07	8.2736e+07	1.86423e+07	2.29054e+07	1.64304e+07	3.99994e+07	2.66395e+07	3.35377e+07	2.51977e+07	2.85896e+07	4.57133e+08	1.82255e+08	1.05925e+08	8.90106e+07	2.94088e+07	3.93211e+08	2.52363e+07	4.59935e+07	6.14787e+07	1.52025e+07	1.59698e+07	1.73545e+07	5.25238e+07	7.10467e+07	6.34623e+07	8.00511e+07	6.00701e+07	6.67087e+07	9.03112e+07	2.35421e+07	3.14488e+07	2.69901e+07	2.31427e+08	7.59063e+08
TRUE		C71 H127 N10 O18 P S	Full match	No results	No results	No results	-0.38	1470.88	491.3	8.956	0	0		DDA for other ion	[M+3H]+3	1.5752e+08	2.10371e+08	1.15731e+07	1.50658e+07	1.26809e+07	5.29285e+07	1.18159e+07	4.07897e+07	1.65963e+07	5.58189e+07	7.08373e+08	3.25064e+08	2.42993e+07	1.726e+08	3.97708e+07	1.47156e+09	1.9563e+07	3.74154e+07	1.2273e+08	5.42311e+06	4.43935e+06	4.33772e+06	1.04011e+08	1.1778e+08	1.05133e+08	6.20293e+07	9.28562e+07	1.16772e+08	1.33812e+08	8.7613e+06	2.82998e+07	2.21854e+07	5.31084e+08	1.34906e+09
TRUE	N-(9Z-hexadecenoyl)sphingosine-1-phosphocholine	C39 H77 N2 O6 P	Full match	No results	No results	Full match	1.83	700.553	701.56	10.147	6	0		No MS2	[M+H]+1	5.48651e+06	1.23233e+09	1.28652e+09	6.80257e+08	5.85038e+08	6.36159e+06	6.18072e+08	5.6855e+08	6.16341e+08	6.16845e+08	9.29987e+06	4.58716e+09	3.56137e+09	4.15044e+09	1.47435e+09	8.78425e+06	2.70586e+09	2.76883e+09	1.86158e+09	1.04129e+07	7.23656e+06	1.81235e+07	2.41009e+08	1.14003e+07	5.71742e+06	7.3947e+06	1.26278e+07	6.83154e+06	6.44413e+06	1.59682e+09	7.26272e+06	1.31542e+09	3.02907e+08	1.15359e+09
TRUE		C38 H81 N5 O7 P2	Full match	No results	No results	No match	-0.43	781.561	782.568	12.602	62	0		No MS2	[M+H]+1	1.56827e+09	3.14877e+06	1.28409e+09	1.43216e+09	1.15186e+09	1.06376e+09	2.28048e+06	2.39647e+09	1.68605e+09	1.81086e+09	1.20007e+09	7.05074e+06	1.31087e+09	1.9222e+09	2.09135e+09	1.52646e+09	9.13886e+06	1.69314e+09	1.94929e+09	1.82309e+06	1.77848e+06	1.88868e+06	1.3816e+09	8.73556e+08	1.85688e+09	1.81201e+09	1.90842e+09	1.9452e+09	2.02008e+08	1.50242e+09	1.95968e+09	1.2716e+07	1.71225e+09	1.4491e+09
TRUE		C90 H161 N10 O13 P3 S3	Full match	No results	No results	No results	0.36	1779.06	594.028	9.031	0	0		DDA for other ion	[M+3H]+3	6.44415e+07	9.02007e+07	3.07128e+06	3.99681e+06	3.71788e+06	1.61139e+07	6.28067e+06	1.39273e+07	6.18919e+06	1.92849e+07	3.79257e+08	1.26943e+08	1.00213e+07	1.12012e+08	3.37751e+07	8.7947e+08	1.01477e+07	2.74967e+07	4.81561e+07	3.22829e+06	3.80201e+06	3.06178e+06	4.34522e+07	4.98086e+07	5.12412e+07	4.38234e+07	5.66429e+07	5.94598e+07	4.97663e+07	2.58583e+06	7.99189e+06	1.4128e+07	2.06111e+08	8.09477e+08
TRUE		C40 H75 N6 O2 P	Full match	No results	No results	No match	0.27	702.569	703.576	12.504	7	0		No MS2	[M+H]+1	1.51695e+06	1.42232e+08	2.45114e+08	5.456e+07	4.06328e+07	1.36379e+06	4.95198e+07	6.03818e+07	6.06901e+07	9.95269e+07	1.75871e+06	3.36693e+08	3.70505e+08	5.1432e+08	2.43239e+08	1.69366e+06	2.52109e+08	2.00891e+08	2.02337e+08	1.08709e+06	846855	1.06291e+06	2.94345e+07	1.0082e+06	1.70041e+06	1.34601e+06	1.30823e+06	1.1469e+06	6.49836e+06	1.06986e+08	1.73629e+06	1.96556e+08	9.83205e+07	8.3875e+07
TRUE		C29 H52 O8	Full match	No results	No results	No results	2.27	528.367	551.357	10.876	0	0		DDA for preferred ion	[M+Na]+1	1.94066e+09	1.13209e+09	1.28177e+09	2.71895e+08	6.19905e+08	1.06117e+09	3.07901e+08	6.58684e+08	7.07046e+08	5.62027e+08	2.0011e+09	1.7484e+09	2.57861e+09	7.22819e+08	2.1291e+09	3.97886e+09	5.74581e+08	8.97239e+08	2.8441e+09	2.8961e+07	1.875e+07	1.93564e+07	5.19843e+08	5.41734e+08	4.93088e+08	4.7868e+08	5.05259e+08	5.49008e+08	4.9627e+08	1.9419e+09	7.10234e+08	2.39379e+09	1.30251e+09	1.4651e+09
TRUE		C27 H46 N6 O6	Full match	No results	No results	No match	2.88	550.349	551.357	10.836	1	0		DDA for preferred ion	[M+H]+1	1.94066e+09	1.13209e+09	1.28177e+09	2.71895e+08	6.19905e+08	1.06117e+09	3.07901e+08	6.58684e+08	7.07046e+08	5.62027e+08	2.0011e+09	1.7484e+09	2.57861e+09	7.22819e+08	2.1291e+09	3.97886e+09	5.74581e+08	8.97239e+08	2.8441e+09	2.8961e+07	1.875e+07	1.93564e+07	5.19843e+08	5.41734e+08	4.93088e+08	4.7868e+08	5.05259e+08	5.49008e+08	4.9627e+08	1.9419e+09	7.10234e+08	2.39379e+09	1.30251e+09	1.4651e+09
TRUE		C24 H50 O7	Full match	No results	No results	No results	-4.23	450.354	529.375	10.869	0	0		DDA for other ion	[M+DMSO+H]+1	4.04361e+08	2.24567e+08	2.23923e+08	2.54672e+07	6.04995e+07	1.61135e+08	2.96779e+07	1.33881e+08	1.13189e+08	6.65729e+07	7.7719e+08	1.00038e+09	1.18195e+09	9.02542e+07	4.28171e+08	2.77043e+09	6.23042e+07	1.66867e+08	6.98131e+08	365015	540295	401758	4.51926e+07	5.30432e+07	4.88784e+07	3.95262e+07	5.21722e+07	6.00263e+07	4.86464e+07	4.55517e+08	1.43042e+08	5.96585e+08	2.30742e+08	3.32938e+08
TRUE	Bis(4-ethylbenzylidene)sorbitol	C24 H30 O6	Full match	Full match	No results	Partial match	1.9	414.205	437.194	9.613	7	2	10	DDA for preferred ion	[M+Na]+1	3.95386e+09	3.08771e+09	3.81526e+09	4.24513e+09	2.32329e+09	3.72878e+09	3.98841e+09	3.75003e+09	2.91962e+09	3.6869e+09	3.27719e+09	3.1509e+09	3.64996e+09	3.62968e+09	3.97278e+09	3.90049e+09	3.73228e+09	3.73344e+09	4.38494e+09	522329	649103	534590	3.74859e+09	2.83733e+09	3.13819e+09	3.03601e+09	3.3923e+09	3.34268e+09	2.91965e+09	3.58068e+09	3.96679e+09	3.64067e+09	3.29616e+09	4.37607e+09
TRUE		C41 H81 N3 O6 P2	Full match	No results	No results	No match	-1.45	773.559	756.556	12.574	5	0		No MS2	[M+H-H2O]+1	2.0658e+07	9.95519e+08	5.29722e+08	2.61098e+08	2.43257e+08	1.30663e+07	2.92065e+08	8.54011e+08	1.87281e+08	1.24248e+08	2.11134e+08	8.08136e+08	3.5416e+08	4.73318e+08	3.35887e+08	4.43121e+07	8.7739e+08	2.88775e+08	1.11245e+08	1.14649e+06	1.11844e+06	964103	9.68076e+07	6.86375e+07	2.10961e+06	2.0394e+07	6.16928e+07	1.35847e+06	1.29771e+07	2.37818e+08	1.37999e+07	9.12767e+08	4.17865e+08	4.76776e+08
TRUE		C45 H80 N5 O4 P	Full match	No results	No results	No match	0.22	785.595	786.602	13.474	69	0		No MS2	[M+H]+1	7.35135e+08	3.09179e+07	1.60054e+09	1.65024e+09	1.44292e+09	1.0541e+09	4.16795e+07	2.91845e+09	1.76607e+09	1.86939e+09	1.3892e+09	2.64401e+07	6.78717e+08	1.68094e+09	9.25261e+08	1.64446e+09	3.15219e+07	1.2421e+09	1.07121e+09	1.21414e+06	1.26527e+06	1.19532e+06	9.74123e+08	8.26627e+08	2.21748e+09	2.71409e+08	1.07344e+09	1.29142e+09	4.35199e+09	8.21795e+08	1.08098e+09	5.28621e+07	2.34296e+09	1.3785e+09
TRUE		C41 H79 N3 O5 P2	Full match	No results	No results	No match	-2.16	755.548	756.555	12.315	48	0		No MS2	[M+H]+1	2.0991e+08	3.44635e+08	3.74762e+08	1.14981e+08	1.61755e+08	1.38885e+08	5.30057e+07	6.50923e+08	3.65082e+08	3.88783e+08	2.11824e+08	1.81426e+06	6.21994e+07	1.40884e+08	1.79137e+08	1.01414e+07	5.60984e+08	1.38828e+08	6.68711e+07	710358	673768	674771	2.68429e+07	7.45487e+07	1.8641e+08	1.85841e+07	5.48422e+07	5.35047e+07	1.0511e+07	5.92523e+07	1.65955e+08	7.44353e+08	1.16274e+08	1.12941e+08
TRUE		C40 H66 N9 P	Full match	No results	No results	No match	-1.88	703.517	704.524	10.913	37	0		No MS2	[M+H]+1	5.96017e+06	1.45556e+08	5.84672e+08	2.56218e+08	2.9623e+08	4.79367e+06	7.18265e+07	1.0822e+08	4.28853e+07	2.63993e+08	9.09994e+06	1.15185e+08	1.62428e+08	1.54576e+08	1.06696e+08	1.15826e+07	2.24428e+08	1.55035e+08	7.20448e+07	1.6289e+06	1.73768e+06	1.57725e+06	1.20445e+08	2.72978e+06	2.83924e+06	2.72055e+06	2.58218e+06	2.911e+06	2.68833e+06	1.78943e+08	7.25696e+06	5.81025e+08	8.70982e+07	3.12386e+08
TRUE	Hypoxanthine	C5 H4 N4 O	Full match	Full match	Partial match	Partial match	1.94	136.039	137.046	1.057	3	2	85.7	DDA for preferred ion	[M+H]+1	1.6677e+09	2.79368e+09	2.77242e+09	2.00685e+09	1.46117e+09	1.93126e+09	1.73633e+09	2.75197e+09	1.92166e+09	2.12067e+09	9.73777e+08	1.36157e+09	9.53835e+08	8.86216e+08	9.07097e+08	7.21712e+08	1.07327e+09	1.07735e+09	1.23659e+09	53086.5	44891.9	52578.5	5.60358e+08	5.56292e+08	6.71189e+08	6.1942e+08	6.96655e+08	7.17126e+08	5.3713e+08	6.1062e+08	3.78687e+09	1.80885e+09	3.24023e+09	3.58005e+09
TRUE	1-Palmitoyl-2-linoleoyl-sn-glycero-phosphatidylcholine	C42 H81 N O8 P	No results	No results	No results	Full match	-4.01	758.567	759.574	14.187	2	0		No MS2	[M+H]+1	4.94203e+06	1.4317e+08	2.80027e+08	1.14677e+08	1.55086e+08	3.31589e+06	1.40915e+08	1.33427e+08	3.94128e+06	9.65537e+07	3.56609e+07	8.70338e+07	2.00659e+08	1.78093e+08	1.33143e+08	1.3914e+07	1.43083e+08	1.20486e+08	8.31106e+07	1.32508e+06	871220	1.05381e+06	1.2615e+06	2.76293e+06	6.26478e+06	3.63543e+06	4.82355e+06	4.52919e+06	4.14157e+07	2.72681e+09	5.73732e+06	4.50105e+08	9.91277e+07	2.30991e+08
TRUE		C55 H95 N2 O11 P	Full match	No results	No results	No results	-0.69	990.667	991.674	11.314	0	0		No MS2	[M+H]+1	8.64502e+08	9.87108e+08	1.35391e+09	2.65481e+08	6.04312e+08	1.59886e+08	4.06497e+08	6.65307e+08	6.73253e+08	1.36665e+09	9.42888e+08	2.72553e+08	4.94765e+08	1.53121e+08	1.76595e+07	9.65729e+07	2.67318e+08	7.70966e+07	6.61632e+07	477808	514415	575139	1.14859e+07	8.94826e+06	6.59053e+06	9.19011e+06	5.74521e+06	8.83631e+06	9.85039e+06	1.37002e+09	1.83388e+09	1.30619e+09	1.4722e+09	1.79547e+09
TRUE		C22 H47 N O2	Full match	No results	No results	No results	2.2	357.361	358.369	9.776	0	0		DDA for preferred ion	[M+H]+1	9.79922e+08	7.22461e+08	9.39819e+08	7.53574e+08	7.81183e+08	1.05335e+09	1.26228e+09	8.59498e+08	8.28907e+08	8.48082e+08	1.1805e+09	1.31983e+09	1.50095e+09	1.64926e+09	1.3488e+09	1.75955e+09	1.1854e+09	9.06329e+08	1.4488e+09	5.2254e+06	5.43069e+06	5.30944e+06	3.57099e+08	3.26743e+08	3.38078e+08	3.31079e+08	2.93332e+08	3.78121e+08	3.25933e+08	4.30812e+09	1.19454e+09	4.94918e+08	1.02226e+09	9.7047e+08
TRUE		C17 H41 N4 O3 P	Full match	No results	No results	No match	-2.16	380.291	381.298	12.542	15	0		No MS2	[M+H]+1	6.06037e+06	8.06457e+06	3.83714e+06	4.46156e+06	4.56919e+06	7.76405e+06	2.67436e+06	1.2096e+06	4.07132e+06	2.06312e+06	3.5668e+06	1.11978e+07	4.45757e+06	5.10591e+06	1.50033e+06	6.79826e+06	8.45649e+06	5.57752e+06	4.67431e+06	1.29594e+07	1.10581e+07	1.23694e+07	1.78974e+06	5.86117e+06	5.33931e+06	3.97023e+06	4.88247e+06	4.32205e+06	1.99321e+06	1.42952e+06	3.76709e+06	2.39816e+06	1.13735e+06	2.1697e+06
TRUE	1-Myristoyl-2-arachidonoyl-sn-glycero-3-phosphocholine	C42 H77 N O8 P	No results	No results	No results	Full match	-4.21	754.535	755.543	11.72	1	0		No MS2	[M+H]+1	2.16913e+08	2.48996e+06	4.1718e+08	1.06075e+08	3.72718e+08	5.10584e+07	1.38055e+06	1.03245e+09	4.21763e+08	7.11453e+08	1.50085e+08	2.79406e+06	3.93382e+07	5.20669e+07	1.47376e+09	4.24573e+08	2.30295e+06	7.34489e+08	1.8627e+07	1.09552e+06	1.05511e+06	1.04838e+06	1.3052e+07	5.38652e+07	2.24931e+08	1.50566e+08	4.48915e+08	1.90168e+08	4.29867e+07	1.92254e+07	5.83322e+08	3.53591e+06	9.55564e+08	6.81765e+08
TRUE		C37 H75 N9 O3 P2	Full match	No results	No results	No match	-1.99	755.545	756.553	11.735	48	0		No MS2	[M+H]+1	2.16913e+08	1.71351e+06	4.1718e+08	1.06075e+08	7.26666e+07	7.58116e+07	950050	1.0319e+09	4.93157e+08	7.11453e+08	1.50085e+08	1.92279e+06	6.46842e+08	1.47617e+09	1.47376e+09	3.49794e+08	1.58482e+06	7.29294e+08	4.89154e+08	753906	726093	721464	2.34686e+08	7.47262e+07	2.9811e+08	1.50916e+08	4.34438e+08	2.19166e+08	4.55773e+07	3.78065e+08	5.83322e+08	3.53591e+06	9.56081e+08	6.81765e+08
TRUE		C40 H73 N6 O2 P	Full match	No results	No results	No match	0.42	700.554	701.561	10.635	6	0		No MS2	[M+H]+1	3.12331e+06	1.21281e+09	1.28241e+09	6.77376e+08	5.86823e+08	2.66654e+06	5.70811e+08	5.58464e+08	6.05109e+08	5.86328e+08	4.60232e+06	3.85718e+09	3.52986e+09	4.12704e+09	1.46277e+09	6.54135e+06	2.70451e+09	2.26107e+09	1.85625e+09	1.13343e+06	1.00643e+06	1.08044e+06	2.06414e+08	1.45254e+06	1.42832e+06	1.38494e+06	1.48387e+06	1.4947e+06	1.44778e+06	1.58892e+09	4.18605e+06	1.30949e+09	2.3249e+08	1.12474e+09
TRUE		C20 H37 N6 O10 P S2	Full match	No results	No match	No match	-1	616.174	617.182	9.36	2	0		No MS2	[M+H]+1	1.5472e+06	1.00301e+06	852690	994218	1.85822e+06	4.81586e+06	3.09784e+06	1.37822e+06	1.40807e+06	833172	1.04261e+07	4.10158e+09	1.12731e+07	1.49073e+07	5.80816e+06	2.74401e+07	8.27078e+06	1.20414e+07	1.90429e+07	517696	441566	413444	2.10822e+06	1.91717e+06	2.14493e+06	2.44558e+06	2.93727e+06	1.1443e+06	2.85936e+06	6.79732e+06	1.04252e+06	3.35078e+06	5.02482e+06	1.4977e+06
TRUE		C45 H80 N5 O4 P	Full match	No results	No results	No match	0.43	785.595	786.602	14.066	69	0		No MS2	[M+H]+1	1.27564e+09	1.07555e+07	1.61187e+09	9.59636e+08	1.1585e+09	2.19731e+09	1.48731e+07	2.05823e+09	1.76384e+09	3.83071e+09	2.46852e+09	2.30454e+07	1.85643e+09	2.66504e+09	2.85383e+09	2.35755e+09	2.81707e+07	2.77027e+09	2.39968e+09	2.3728e+06	1.83025e+06	1.67681e+06	1.4145e+09	1.11138e+09	1.58372e+09	3.05217e+09	3.06134e+09	4.03858e+09	8.88117e+08	1.87788e+09	2.1926e+09	1.16146e+07	1.85903e+09	1.25766e+09
TRUE	Piperine	C17 H19 N O3	Full match	Full match	No results	Partial match	2.25	285.137	286.144	9.624	14	1	89.2	DDA for preferred ion	[M+H]+1	2.02752e+08	1.60291e+08	1.72853e+07	2.32732e+07	4.471e+06	1.553e+07	5.57754e+06	3.65038e+08	2.78761e+07	4.10836e+07	1.44936e+09	1.07448e+09	2.24316e+08	5.91336e+08	6.86825e+07	3.46989e+08	1.56009e+08	3.24556e+08	6.18383e+08	150245	163888	149958	3.61973e+07	3.53752e+07	3.7961e+07	3.48459e+07	3.95017e+07	3.89647e+07	4.1414e+07	2.76532e+07	3.93703e+07	2.66027e+08	1.99847e+08	4.17357e+08
TRUE	(18R)-24-Amino-21-hydroxy-21-oxido-15-oxo-16,20,22-trioxa-21λ~5~-phosphatetracosan-18-yl (9Z)-9-octadecenoate	C38 H74 N O8 P	Full match	No results	No results	Full match	2.02	703.517	704.524	11.192	37	0		No MS2	[M+H]+1	3.11401e+06	1.511e+08	3.98674e+08	4.05736e+08	4.93957e+08	2.68104e+06	4.87333e+07	1.12065e+08	5.54039e+07	1.86679e+08	3.84282e+06	1.66642e+08	1.55896e+08	1.64314e+08	4.08778e+07	4.23123e+06	2.72763e+08	1.97831e+08	4.37252e+07	1.88243e+06	1.86609e+06	2.00909e+06	1.44238e+08	2.58835e+06	2.30244e+06	3.0994e+06	2.79402e+06	2.40913e+06	2.68712e+06	2.73455e+08	4.51444e+06	6.92746e+08	8.74396e+07	3.26127e+08
TRUE		C45 H80 N5 O4 P	Full match	No results	No results	No match	0.14	785.595	786.602	13.663	69	0		No MS2	[M+H]+1	2.18977e+08	9.03215e+06	9.49358e+08	9.26012e+08	8.44041e+08	1.32608e+09	8.73366e+06	1.67101e+09	1.16265e+09	1.17964e+09	8.57093e+08	1.1717e+07	3.65077e+08	7.01273e+08	4.60999e+08	6.02932e+08	1.12531e+07	5.70954e+08	4.74561e+08	966610	907808	946667	4.12392e+08	5.12976e+08	1.22941e+09	2.75698e+08	6.94804e+08	7.82488e+08	2.04415e+09	3.094e+08	5.73357e+08	1.05883e+07	6.43469e+08	5.98358e+08
TRUE		C41 H72 N5 O4 P	Full match	No results	No results	No match	0.4	729.532	730.54	12.047	41	0		No MS2	[M+H]+1	1.45554e+06	7.39835e+08	1.18093e+09	8.39918e+08	6.83562e+08	942224	3.16701e+08	6.27439e+08	3.71703e+08	7.7429e+08	1.53789e+06	9.39906e+08	5.43497e+08	7.10225e+08	9.5624e+08	987098	8.10694e+08	6.08749e+08	3.80073e+08	442095	427609	458079	2.61131e+08	896991	3.09904e+06	646888	483994	931793	791733	3.9141e+08	1.16479e+06	6.48053e+08	4.81345e+08	9.78407e+08
TRUE		C18 H42 N5 P	Full match	No results	No results	No match	-1.64	359.317	360.324	13.321	8	0		DDA for preferred ion	[M+H]+1	1.33068e+08	7.68876e+07	8.55444e+07	1.31212e+08	1.2245e+08	1.70372e+08	2.74086e+08	6.69743e+07	4.94197e+07	7.42699e+07	8.11506e+07	9.80505e+07	1.93078e+08	2.16236e+08	2.28792e+08	2.13399e+08	9.76358e+07	8.96458e+07	1.16281e+08	3.7782e+07	4.06781e+07	4.17519e+07	4.50039e+07	5.06943e+07	3.81268e+07	3.25355e+07	4.05731e+07	3.84061e+07	1.61599e+07	2.67214e+08	1.10438e+08	8.90481e+07	7.43759e+07	8.21987e+07
TRUE	1-Linoleoyl-2-Hydroxy-sn-glycero-3-PC	C26 H50 N O7 P	Full match	No results	No results	Full match	2.05	519.334	520.341	11.032	3	0		DDA for preferred ion	[M+H]+1	1.56674e+09	1.73736e+09	1.41065e+09	7.08529e+08	7.27063e+08	6.13317e+08	6.44813e+08	1.7036e+09	7.85814e+08	1.37079e+09	3.02968e+09	1.30815e+09	1.52015e+09	1.05095e+09	4.14592e+08	1.02485e+09	9.78059e+08	3.11182e+08	5.31445e+08	397615	356307	351366	1.20979e+08	1.0519e+08	1.03217e+08	1.1496e+08	1.07561e+08	1.23924e+08	1.41776e+08	2.49992e+09	2.73076e+09	3.4719e+09	2.72228e+09	2.19797e+09
TRUE	Methyl (2E,4E,6E,8E,10E,12E,14E,16E)-17-[(1R,2S,4S)-2-hydroxy-2,6,6-trimethyl-7-oxabicyclo[2.2.1]hept-1-yl]-2,6,11,15-tetramethyl-2,4,6,8,10,12,14,16-heptadecaoctaenoate	C31 H42 O4	No results	No results	No results	Full match	-1.72	478.307	520.341	11.03	1	0		DDA for other ion	[M+ACN+H]+1	1.56674e+09	1.73736e+09	1.41065e+09	7.08529e+08	7.27063e+08	6.13317e+08	6.44813e+08	1.7036e+09	7.85814e+08	1.37079e+09	3.02968e+09	1.283e+09	1.52015e+09	1.05095e+09	4.14592e+08	1.02485e+09	9.78059e+08	3.11182e+08	5.31445e+08	418611	375121	369919	1.20979e+08	1.0519e+08	1.03217e+08	1.1496e+08	1.07561e+08	1.23924e+08	1.41776e+08	2.49992e+09	2.73076e+09	3.4719e+09	2.72228e+09	2.19797e+09
TRUE	Dioleoylphosphatidylserine	C42 H78 N O10 P	Full match	No results	No results	Full match	1.81	787.538	788.545	13.489	24	0		No MS2	[M+H]+1	5.46048e+06	3.57374e+06	4.59095e+06	1.80848e+06	2.80261e+06	7.33958e+06	2.2449e+06	1.68547e+06	2.97052e+06	830881	2.47842e+07	4.0975e+07	1.38406e+07	4.64656e+06	737194	7.28154e+06	4.92029e+06	880179	6.22982e+06	645116	704161	665231	735199	778695	829332	1.93322e+06	2.33173e+06	1.44058e+06	739647	1.26898e+07	7.79751e+06	890686	1.91885e+08	6.5798e+07
TRUE	Aspirin	C9 H8 O4	Full match	No results	Partial match	Full match	1.3	180.042	163.039	12.697	20	0		No MS2	[M+H-H2O]+1	2.70093e+08	3.69144e+09	2.4095e+08	2.56129e+08	2.37111e+08	3.20011e+08	2.9062e+08	2.01078e+08	2.12442e+08	2.43617e+08	2.27789e+08	2.51067e+08	2.21232e+08	2.21254e+08	2.18861e+08	4.5508e+08	2.68135e+08	2.39683e+08	2.58764e+08	2.62591e+08	2.60266e+08	2.46832e+08	2.10683e+08	2.31061e+08	2.29031e+08	2.3357e+08	2.36154e+08	2.2349e+08	2.79832e+08	2.51182e+08	3.65583e+08	2.45947e+08	2.56962e+08	2.43837e+08
TRUE	(11Z)-eicoseneoylcarnitine	C27 H51 N O4	Full match	No results	No results	Full match	2.01	453.383	454.39	10.166	1	0		DDA for preferred ion	[M+H]+1	2.01477e+09	8.1074e+08	8.70295e+08	1.67512e+07	4.60948e+08	2.55528e+08	6.10344e+08	2.36892e+07	9.67024e+08	1.76221e+07	2.72047e+08	4.26773e+07	1.01526e+08	5.6442e+07	2.65501e+07	2.87635e+07	1.02823e+08	3.12973e+07	2.77918e+07	1.82799e+06	588752	3.1816e+06	5.77429e+07	6.33001e+07	5.48296e+07	5.41894e+07	6.57745e+07	7.8054e+07	7.05893e+07	3.29772e+08	5.68653e+07	6.35088e+08	1.14788e+09	1.85275e+09
TRUE		C18 H34 N6 O3	Full match	No results	No results	No results	-4.87	382.267	782.569	12.392	0	0		No MS2	[2M+NH4]+1	9.80721e+07	1.30417e+06	1.28409e+09	1.43216e+09	2.88445e+07	1.85341e+07	2.15853e+06	3.20233e+08	1.68605e+09	1.17498e+08	2.92056e+07	4.97235e+06	1.23704e+08	2.53853e+09	8.56275e+08	3.7616e+08	8.26955e+06	7.4393e+08	3.6324e+08	865015	820459	819965	9.75647e+07	1.51664e+07	2.65597e+07	1.60466e+08	1.06935e+08	4.65322e+07	1.04165e+09	2.10882e+08	1.14407e+08	1.13482e+06	1.34646e+09	1.32424e+08
TRUE		C35 H75 N9 O9	Full match	No results	No results	No match	0.25	765.569	766.576	10.675	18	0		No MS2	[M+H]+1	5.00172e+08	7.49882e+06	4.41981e+08	4.74435e+08	6.81905e+08	4.40229e+08	2.98012e+06	7.67634e+08	6.83914e+08	5.3982e+08	2.51512e+08	1.27919e+07	3.35471e+09	3.64517e+09	1.79952e+09	4.39609e+08	3.70359e+06	1.09302e+09	1.70752e+09	2.24656e+06	2.03813e+06	1.99789e+06	4.46174e+08	4.10003e+08	5.83955e+08	6.16515e+08	7.97854e+08	7.45032e+08	7.18423e+07	1.02125e+09	5.71919e+08	6.04585e+06	7.78443e+08	4.8565e+08
TRUE		C35 H56 N9 O P	Full match	No results	No results	No match	-2.3	649.433	650.44	11.69	3	0		No MS2	[M+H]+1	2.99919e+07	5.09699e+06	1.13798e+07	4.40787e+06	9.52551e+06	1.86066e+07	4.69208e+06	2.34039e+07	2.09591e+07	3.81185e+06	1.22547e+08	8.33685e+07	4.00109e+07	2.64094e+07	1.07871e+07	2.10044e+07	2.97356e+07	4.79369e+06	5.30954e+06	483684	517562	462070	998527	586323	649630	783010	639921	598861	708412	1.89855e+07	1.49421e+07	6.444e+06	9.24245e+08	1.41815e+08
TRUE		C33 H62 O6 S	Full match	No results	No results	No results	-3.85	586.424	650.44	11.697	0	0		No MS2	[M+ACN+Na]+1	2.17133e+07	4.44354e+06	1.13798e+07	4.40787e+06	7.8123e+06	1.86066e+07	4.69208e+06	2.34039e+07	2.09591e+07	3.81185e+06	1.03417e+08	8.33685e+07	4.00109e+07	2.64094e+07	1.07871e+07	2.10044e+07	2.97356e+07	4.79369e+06	5.30954e+06	366617	392296	350235	680098	422095	566370	783010	528383	598861	708412	1.89855e+07	1.49421e+07	6.444e+06	9.24245e+08	1.41815e+08
TRUE	(4S)-4-{[(9Z)-3-Hydroxy-9-octadecenoyl]oxy}-4-(trimethylammonio)butanoate	C25 H47 N O5	Full match	No results	No results	Full match	1.64	441.346	442.353	9.672	3	0		DDA for preferred ion	[M+H]+1	5.00708e+08	1.22759e+09	5.19949e+08	1.72631e+08	1.10687e+09	1.65162e+08	1.60559e+08	4.11754e+08	3.8701e+08	5.63636e+08	3.28498e+07	4.35818e+07	3.14048e+07	1.28581e+07	4.55695e+06	1.02283e+07	1.15657e+07	6.39113e+06	1.87867e+07	162483	176329	184578	3.45597e+07	2.73405e+07	2.87017e+07	2.91517e+07	2.92614e+07	3.30737e+07	3.57904e+07	1.29067e+08	7.82681e+08	4.52518e+08	8.65323e+08	1.43438e+09
TRUE		C41 H81 N9 O3 P2	Full match	No results	No results	No match	1.53	809.595	810.602	13.676	46	0		No MS2	[M+H]+1	1.71766e+09	2.09787e+08	1.56851e+09	9.56577e+08	2.1814e+09	1.78642e+09	1.9819e+08	3.53485e+09	2.22619e+09	2.15938e+09	1.84287e+09	1.63811e+08	7.16613e+08	1.53421e+09	1.17827e+09	2.02545e+09	1.10519e+08	1.32606e+09	9.31489e+08	1.34397e+06	1.36668e+06	1.4579e+06	9.7475e+08	2.42768e+09	2.45905e+09	1.84816e+09	2.61101e+09	3.14663e+09	8.93695e+07	1.57855e+09	1.96618e+09	1.2573e+08	2.39192e+09	1.04605e+09
TRUE		C43 H77 N3 O6	Full match	No results	No results	No match	0.11	731.581	810.603	13.639	14	0		No MS2	[M+DMSO+H]+1	6.71344e+08	2.09787e+08	1.56851e+09	9.56577e+08	2.1814e+09	1.73939e+09	1.9819e+08	3.53485e+09	2.03536e+09	2.15938e+09	1.84287e+09	1.63811e+08	7.16613e+08	1.53421e+09	1.17827e+09	2.02545e+09	1.2525e+08	1.32606e+09	9.31489e+08	870125	791868	774419	9.7475e+08	2.28471e+09	2.36563e+09	1.84816e+09	2.61101e+09	3.14663e+09	8.93695e+07	1.57855e+09	1.96618e+09	1.68e+08	2.39192e+09	1.04605e+09
TRUE		C39 H70 N6 O12	Full match	No results	No results	No results	1.6	814.506	815.514	10.867	0	0		DDA for preferred ion	[M+H]+1	1.26349e+09	1.18255e+09	1.14345e+09	7.54556e+07	2.14662e+08	8.71121e+08	1.0903e+08	7.37744e+08	1.12705e+09	2.814e+08	2.15695e+09	2.63752e+09	2.40169e+09	2.41786e+08	6.45255e+08	2.68246e+09	1.27552e+08	1.25431e+09	9.87491e+08	1.234e+06	1.00226e+06	908959	2.46943e+08	1.10765e+07	2.43417e+08	2.55771e+08	2.73252e+08	2.99523e+08	2.46856e+08	1.05522e+09	1.23277e+09	1.32079e+09	9.59608e+08	1.55127e+09
TRUE		C21 H36 N2 O5	Full match	No results	No results	No match	0.24	396.263	815.514	10.861	1	0		DDA for other ion	[2M+Na]+1	1.26349e+09	1.18255e+09	1.14345e+09	7.54556e+07	2.14662e+08	8.71121e+08	1.0903e+08	7.37744e+08	1.12705e+09	2.814e+08	2.15695e+09	2.63752e+09	2.40169e+09	2.41786e+08	6.45255e+08	2.68246e+09	1.27552e+08	1.25431e+09	9.87491e+08	1.234e+06	1.00226e+06	908959	2.46943e+08	2.58428e+08	2.43417e+08	2.55771e+08	2.73252e+08	2.99523e+08	2.46856e+08	1.05522e+09	1.23277e+09	1.32079e+09	9.59608e+08	1.55127e+09
TRUE		C43 H81 N3 O4 P2	Full match	No results	No results	No match	-1.79	765.569	766.576	10.178	18	0		No MS2	[M+H]+1	1.27899e+08	3.81748e+06	2.49026e+08	1.39578e+08	1.41106e+08	2.95661e+07	6.12831e+06	1.95322e+08	1.49469e+08	1.31964e+08	1.20046e+08	3.05479e+06	2.5593e+09	3.444e+09	1.54218e+09	5.33395e+08	6.95394e+06	1.95458e+09	1.38101e+09	5.72909e+06	3.98151e+06	9.97146e+06	1.81012e+08	7.00311e+07	7.27212e+07	2.17038e+08	5.16372e+08	3.1953e+08	6.43964e+07	2.24603e+09	2.94809e+08	2.84071e+06	9.24374e+08	2.97654e+08
TRUE		C47 H80 N5 O4 P	Full match	No results	No results	No match	-0.5	809.594	810.602	13.486	46	0		No MS2	[M+H]+1	1.69105e+09	2.1098e+08	1.51461e+09	9.56577e+08	2.1814e+09	1.68384e+09	1.9819e+08	3.43423e+09	2.01008e+09	2.15004e+09	1.80168e+09	1.63811e+08	7.20464e+08	1.50042e+09	1.15788e+09	2.02545e+09	1.66216e+08	1.32663e+09	9.31489e+08	1.62755e+06	1.6961e+06	1.60233e+06	9.6757e+08	2.21453e+09	2.29238e+09	1.84816e+09	2.50083e+09	3.04521e+09	2.01406e+08	1.51805e+09	1.96618e+09	1.68e+08	2.39192e+09	1.04605e+09
TRUE		C52 H97 N6 O11 P3	Full match	No results	No results	No results	-0.63	1074.64	538.328	8.818	0	0		DDA for other ion	[M+2H]+2	6.22969e+07	6.00045e+07	1.9109e+07	1.75397e+07	1.65592e+07	3.42701e+07	2.18951e+07	4.06113e+07	2.30545e+07	2.75631e+07	3.33819e+08	1.51981e+08	7.36028e+07	7.54149e+07	2.93702e+07	4.32561e+08	2.87066e+07	4.72354e+07	5.16088e+07	1.89864e+07	1.74717e+07	2.76698e+07	5.5306e+07	5.49485e+07	5.49278e+07	4.93667e+07	5.6398e+07	7.04953e+07	4.55328e+07	2.31725e+07	2.61561e+07	2.67105e+07	1.64707e+08	5.42722e+08
TRUE		C23 H46 N6 O5	Full match	No results	No results	No results	2.76	486.354	487.362	11.073	0	0		DDA for preferred ion	[M+H]+1	2.93959e+08	9.42446e+08	2.18704e+08	3.76364e+08	3.60369e+08	5.13517e+08	4.9772e+08	3.39095e+09	9.30328e+07	5.59439e+08	5.77159e+08	1.43532e+09	5.90711e+08	1.25064e+09	9.17742e+08	7.36118e+08	1.169e+09	3.55422e+08	2.91126e+08	1.87408e+07	2.42482e+07	2.14642e+07	7.61163e+07	8.0362e+07	7.43651e+07	7.83429e+07	7.02891e+07	8.34023e+07	8.33413e+07	7.29443e+08	5.54969e+08	5.34139e+08	3.1314e+08	1.41495e+08
TRUE		C33 H67 O6 P3	Full match	No results	No results	No results	3.76	652.418	653.425	11.128	0	0		DDA for preferred ion	[M+H]+1	9.98243e+07	9.58763e+07	5.8664e+07	6.97694e+06	1.66211e+07	5.63705e+07	1.05072e+07	2.77518e+07	3.14106e+07	1.80443e+07	2.29563e+08	8.04138e+07	3.07139e+08	1.08667e+07	7.15105e+07	1.10741e+09	1.27446e+07	1.2703e+08	1.17245e+08	520608	545089	536622	1.45459e+07	1.41764e+07	1.68235e+07	2.00491e+07	1.37431e+07	1.4866e+07	4.16131e+07	7.78162e+07	5.43212e+07	1.51948e+08	6.67273e+07	1.01354e+08
TRUE		C33 H60 N6 O3 S2	Full match	No results	No results	No results	1.36	652.418	653.425	11.062	0	0		DDA for preferred ion	[M+H]+1	2.86561e+08	9.58763e+07	1.75717e+08	1.64892e+07	3.93111e+07	5.63705e+07	1.87333e+07	3.94791e+07	1.04467e+08	5.32695e+07	2.29563e+08	2.13432e+08	3.07139e+08	3.7698e+07	7.15105e+07	1.10741e+09	2.07283e+07	1.2703e+08	1.17245e+08	700743	716035	729803	3.85596e+07	4.38173e+07	1.95942e+07	2.00491e+07	1.96286e+07	3.72474e+07	4.16131e+07	7.78162e+07	5.43212e+07	1.51948e+08	1.66894e+08	1.01354e+08
TRUE		C34 H60 N6 O9	Full match	No results	No results	No results	2.69	696.444	697.451	11.067	0	0		DDA for preferred ion	[M+H]+1	9.06593e+07	7.29518e+07	1.8956e+08	5.44067e+06	3.80561e+07	1.25235e+08	1.94068e+07	7.05641e+07	1.02048e+08	5.19597e+07	2.24593e+08	2.39742e+08	9.93031e+08	2.88065e+07	6.03307e+07	1.11904e+09	1.83065e+07	1.08767e+08	9.46532e+07	487409	499438	509041	3.19969e+07	2.06952e+07	2.02798e+07	1.78145e+07	2.92635e+07	3.93892e+07	2.64229e+07	1.61798e+08	6.15805e+07	3.85439e+08	1.50773e+08	1.07942e+08
TRUE		C32 H65 N4 O10 P	Full match	No results	No results	No results	0.07	696.444	697.451	11.128	0	0		DDA for preferred ion	[M+H]+1	9.06593e+07	8.41308e+07	5.59252e+07	5.44067e+06	3.80561e+07	5.4059e+07	1.06937e+07	7.05641e+07	3.10061e+07	1.71373e+07	2.24593e+08	3.5173e+07	3.13761e+08	9.92545e+06	6.03307e+07	6.53573e+08	9.99737e+06	3.23581e+07	9.46532e+07	503466	527142	518954	1.38257e+07	1.37421e+07	1.72255e+07	1.78145e+07	1.79602e+07	1.32467e+07	1.55111e+07	6.99423e+07	3.49085e+07	1.42588e+08	5.62674e+07	1.07942e+08
TRUE		C42 H56 N4 O S	Full match	No results	No results	No results	1.92	664.419	697.452	11.099	0	0		DDA for other ion	[M+H+MeOH]+1	1.2706e+08	4.70267e+07	5.59252e+07	6.93119e+06	3.80561e+07	5.4059e+07	1.94068e+07	7.05641e+07	4.58919e+07	1.71373e+07	2.24593e+08	2.39742e+08	3.13761e+08	1.33487e+07	8.69408e+07	1.77261e+09	1.83065e+07	1.08767e+08	1.48302e+08	557861	523123	575022	2.04822e+07	2.06952e+07	2.02798e+07	1.78145e+07	1.79602e+07	1.32467e+07	4.1934e+07	6.99423e+07	9.6489e+07	1.42588e+08	5.62674e+07	1.4993e+08
TRUE	Oleic acid	C18 H34 O2	Full match	No results	Full match	Full match	-0.31	282.256	281.249	12.534	60	0		No MS2	[M-H]-1	9.27303e+06	6.0341e+06	9.56409e+06	4.62297e+06	2.39221e+06	471045	3.07152e+06	3.98168e+06	7.88538e+06	2.60109e+06	1.23936e+07	1.26522e+07	1.17e+07	6.4413e+06	1.64503e+07	1.93343e+06	7.48905e+06	3.24643e+07	9.95666e+06	722063	629246	635655	1.16412e+06	1.91528e+06	1.7043e+06	1.86957e+06	2.00484e+06	2.22228e+06	2.61177e+06	6.74716e+06	1.99608e+07	8.42411e+06	2.15212e+07	1.49759e+07
TRUE	Dodecyl sulfate	C12 H26 O4 S	Full match	Full match	No results	No results	0.47	266.155	265.148	13.298	0	2	9.9	DDA for preferred ion	[M-H]-1	4.33968e+07	3.48196e+07	3.77613e+07	2.70119e+07	2.63623e+07	3.46562e+07	2.89436e+07	2.31374e+07	2.38989e+07	2.08487e+07	7.24189e+07	4.11972e+07	7.96913e+07	1.65588e+07	5.42697e+07	8.0454e+07	5.70485e+07	5.14564e+07	7.56148e+07	6.9913e+07	7.11376e+07	7.53488e+07	4.8266e+07	3.03472e+07	2.60263e+07	1.23783e+08	4.58768e+07	3.71778e+07	1.35369e+08	4.25706e+07	4.38961e+08	8.7088e+07	6.77184e+07	6.8741e+07
TRUE	L-α-Glycerylphosphorylcholine	C8 H20 N O6 P	Full match	No results	No results	Full match	2.06	257.103	258.111	0.992	2	0		DDA for preferred ion	[M+H]+1	1.77718e+09	1.36149e+09	2.76265e+08	7.11985e+08	7.8711e+07	1.6781e+09	3.11051e+08	3.10539e+08	5.45095e+08	2.98978e+09	9.0817e+07	2.70009e+08	2.92017e+08	9.53758e+07	1.9915e+08	1.01609e+08	2.0947e+08	4.71357e+08	2.31137e+08	31509.1	29951	33443.1	1.03705e+08	1.37715e+08	1.07954e+08	1.25195e+08	1.21808e+08	1.11123e+08	9.02431e+07	8.72942e+07	1.03962e+09	4.10123e+08	1.62167e+08	3.33961e+08
TRUE		C89 H177 N8 O16 P3 S5	Full match	No results	No results	No results	2.15	1867.11	623.379	9.04	0	0		DDA for other ion	[M+3H]+3	1.5906e+07	4.45881e+07	701191	2.32177e+06	7.17747e+06	1.54145e+07	1.12352e+06	3.70287e+06	9.03355e+06	5.46856e+06	1.85898e+08	7.04824e+07	2.56041e+06	4.76871e+07	2.04548e+07	4.36575e+08	8.76007e+06	1.37523e+07	2.58564e+07	2.49418e+06	2.55496e+06	1.63863e+06	2.16475e+07	2.85349e+07	2.80386e+07	1.97482e+07	2.47508e+07	3.32031e+07	2.36799e+07	817309	5.57545e+06	4.37833e+06	1.00896e+08	3.6667e+08
TRUE	Paracetamol	C8 H9 N O2	Full match	Full match	Partial match	Full match	2.4	151.064	152.071	2.902	17	5	88.5	DDA for preferred ion	[M+H]+1	7.3651e+08	1.09042e+09	7.0325e+08	7.57635e+08	1.15552e+09	2.01506e+08	1.24889e+07	3.01958e+07	1.09927e+07	1.29502e+07	3.67461e+08	3.78588e+08	4.10893e+08	6.86506e+08	3.25051e+08	2.74658e+08	1.24609e+07	1.1732e+07	1.1461e+07	3.49708e+06	3.40715e+06	3.34491e+06	7.5488e+07	5.8845e+07	7.3059e+07	9.09819e+07	5.59217e+07	1.0578e+08	1.10076e+08	6.03244e+08	1.47755e+09	2.78534e+07	1.6408e+09	6.77535e+08
TRUE		C34 H54 N2 O8	Full match	No results	No results	No match	3.07	618.39	619.397	8.639	2	0		No MS2	[M+H]+1	572425	537441	642247	403653	386398	515041	1.60476e+08	304481	455794	483463	582883	617991	283154	654228	351015	951614	3.12748e+09	325343	491182	90961	86175.9	93856.4	5.26365e+06	5.33855e+06	4.71845e+06	5.03634e+06	5.56366e+06	5.76487e+06	7.02059e+06	429055	908022	353151	683910	1.08973e+06
TRUE	Androsterone sulfate	C19 H30 O5 S	Full match	No results	No results	Full match	0.07	370.181	369.174	10.236	4	0		DDA for preferred ion	[M-H]-1	9.02499e+07	1.48274e+06	1.75164e+07	4.5401e+07	3.12033e+09	3.27188e+06	1.50033e+06	7.70779e+06	9.34632e+07	1.96467e+07	4.37544e+07	1.88118e+06	7.54127e+06	1.02768e+08	1.41313e+07	5.84887e+06	2.59694e+06	2.94552e+07	1.75557e+07	65602.6	64937.5	57905.7	1.52519e+07	1.48261e+07	1.43671e+07	1.50597e+07	1.4118e+07	1.64462e+07	1.6933e+07	3.94544e+07	1.21871e+08	3.03224e+07	5.55281e+07	1.72307e+07
TRUE		C45 H78 N5 O4 P	Full match	No results	No results	No match	0.27	783.579	784.587	11.087	48	0		No MS2	[M+H]+1	1.09817e+09	1.24376e+07	2.24319e+09	1.1437e+09	1.94864e+09	6.9683e+08	6.08699e+06	3.08317e+09	2.65983e+09	1.39676e+09	9.91479e+08	1.76929e+07	1.21714e+09	1.67715e+09	1.18933e+09	3.91914e+08	8.43128e+06	1.54533e+09	1.18776e+09	3.55522e+06	3.52435e+06	3.79442e+06	1.08173e+09	9.97312e+08	2.77957e+09	8.77704e+08	1.97871e+09	1.67672e+09	2.27571e+08	9.44897e+08	8.15515e+08	1.31282e+07	2.81284e+09	7.72418e+08
TRUE		C45 H76 N5 O4 P	Full match	No results	No results	No match	0.23	781.564	782.571	13.353	62	0		No MS2	[M+H]+1	1.10006e+08	2.0789e+09	6.1307e+08	9.78551e+08	8.55325e+08	1.26513e+08	1.09494e+09	6.27252e+08	1.47842e+09	6.99476e+08	1.14704e+08	1.14659e+09	1.13267e+09	1.1532e+09	1.38892e+09	7.32249e+07	1.35422e+09	1.01584e+09	3.17964e+08	1.18158e+06	1.14786e+06	1.13977e+06	4.0523e+08	9.79777e+07	2.3853e+08	9.65933e+07	1.07045e+08	1.36367e+08	3.24441e+07	8.48955e+08	8.49106e+07	8.85522e+08	8.91223e+08	1.51699e+09
TRUE	Dexamisole	C11 H12 N2 S	Full match	No results	No results	Full match	1.97	204.073	205.08	8.533	3	0		DDA for preferred ion	[M+H]+1	1.25812e+09	1.32844e+09	1.54864e+09	1.66068e+09	1.60834e+09	2.36202e+09	1.2662e+09	1.97747e+09	9.52586e+08	2.29979e+09	1.42884e+09	2.32008e+09	2.13393e+09	2.52927e+09	3.04237e+09	2.51346e+09	2.33e+09	2.0847e+09	1.6924e+09	97701.4	95288	93568.9	3.06104e+08	3.02331e+08	2.74899e+08	2.74957e+08	2.92653e+08	2.92411e+08	2.62026e+08	1.00856e+09	1.06666e+09	1.37917e+09	1.10938e+09	7.50263e+08
TRUE		C25 H48 N5 O2 P	Full match	No results	No results	No match	-0.81	481.354	482.361	11.837	2	0		DDA for preferred ion	[M+H]+1	6.5867e+08	6.03814e+08	1.16917e+09	2.54245e+08	9.24341e+07	1.9019e+08	2.0604e+08	2.30097e+08	2.99071e+08	4.81995e+08	7.40892e+08	3.69525e+08	3.06018e+08	2.04523e+08	5.38314e+07	2.34042e+08	6.03929e+08	1.46859e+08	1.25228e+08	452540	382732	421056	3.98322e+07	4.11324e+07	4.37347e+07	3.73398e+07	3.93096e+07	4.61239e+07	3.93162e+07	1.45019e+08	1.07617e+09	4.00029e+08	4.14915e+08	5.06994e+08
TRUE	D-Carnitine	C7 H15 N O3	Full match	Full match	No results	Full match	1.98	161.106	162.113	0.983	3	3	78.7	DDA for preferred ion	[M+H]+1	1.33082e+09	2.24394e+09	6.04605e+08	9.17399e+08	5.32688e+08	8.50991e+08	3.02355e+08	7.22057e+08	1.12567e+09	1.68802e+09	5.50842e+07	1.80976e+08	1.73311e+08	1.50895e+08	1.68035e+08	1.15557e+08	1.5269e+08	1.49406e+08	8.79894e+07	26197.2	24901.8	27805.2	2.81093e+08	2.52063e+08	2.38464e+08	2.34273e+08	2.43206e+08	3.24776e+08	2.46449e+08	3.58766e+08	1.03436e+09	7.56698e+08	1.25979e+09	1.23095e+09
TRUE	Pipecolic acid	C6 H11 N O2	Full match	No results	Full match	Full match	2.33	129.079	162.113	0.988	12	0		DDA for preferred ion	[M+H+MeOH]+1	1.33082e+09	2.24394e+09	6.04605e+08	9.17399e+08	5.32688e+08	8.50991e+08	3.02355e+08	7.22057e+08	1.12567e+09	1.68802e+09	5.50842e+07	1.80976e+08	1.73311e+08	1.50895e+08	1.68035e+08	1.15557e+08	1.5269e+08	1.49406e+08	8.79894e+07	22268.1	21166.9	23634.9	2.81093e+08	2.52063e+08	2.38464e+08	3.36446e+06	2.43206e+08	3.24776e+08	2.46449e+08	3.58766e+08	1.03436e+09	7.56698e+08	1.25979e+09	1.23095e+09
TRUE		C43 H76 N5 O3 P	Full match	No results	No results	No match	0.59	741.569	742.576	10.304	10	0		No MS2	[M+H]+1	1.84739e+06	2.22965e+06	1.96809e+06	2.02591e+06	1.85542e+06	2.00185e+06	2.06414e+06	2.44388e+06	2.61569e+06	2.018e+06	2.45904e+06	3.52455e+06	2.16408e+07	2.41235e+07	4.01489e+07	2.42056e+06	2.35953e+06	2.34519e+07	2.39641e+07	1.11422e+06	1.26143e+06	1.19071e+06	1.36585e+06	1.5118e+06	1.43011e+06	1.08165e+07	1.41525e+06	1.27996e+06	8.72122e+08	1.81204e+07	2.30945e+06	2.25415e+06	3.95203e+06	2.31111e+06
TRUE	hypaphorine	C14 H18 N2 O2	Full match	Invalid mass	No results	Full match	2.25	246.137	247.145	5.284	1	1		DDA for preferred ion	[M+H]+1	1.91966e+08	8.46546e+08	1.43387e+08	2.06115e+08	1.14871e+08	1.17887e+08	3.60716e+07	4.69353e+08	9.65033e+06	1.25797e+08	5.18017e+07	1.19367e+08	3.13239e+07	5.17621e+07	5.32087e+07	4.1989e+07	1.34963e+07	5.44701e+06	4.5703e+07	322170	318371	323740	3.29562e+07	3.29302e+07	3.1219e+07	3.21102e+07	1.35666e+07	3.52489e+07	3.27848e+07	7.44714e+08	6.89609e+08	1.97935e+08	5.6503e+08	7.54995e+08
TRUE		C24 H51 N8 O3 P	Full match	No results	No results	No results	-3.84	530.38	531.388	11.073	0	0		DDA for preferred ion	[M+H]+1	1.21998e+08	9.23725e+08	1.32829e+08	2.4423e+08	2.09887e+08	3.92901e+08	2.95755e+08	2.97992e+09	5.46584e+07	3.50333e+08	5.0176e+08	1.29117e+09	4.57514e+08	9.61436e+08	7.99547e+08	6.29184e+08	8.92432e+08	2.045e+08	1.65855e+08	1.1575e+07	1.21742e+07	1.26582e+07	6.50391e+07	6.50539e+07	5.35424e+07	6.44396e+07	6.4577e+07	6.64799e+07	6.74584e+07	7.63243e+08	4.93244e+08	4.21921e+08	2.31222e+08	9.45951e+07
TRUE		C20 H49 N10 O4 P	Full match	No results	No results	No results	1.62	524.368	525.376	12.251	0	0		DDA for preferred ion	[M+H]+1	2.33053e+07	4.45414e+07	5.62543e+07	1.8834e+07	1.01658e+07	1.98474e+07	2.00278e+07	4.98693e+07	2.81604e+07	2.90025e+07	4.43822e+07	2.42777e+07	3.93853e+07	2.81857e+07	6.919e+06	2.78766e+07	6.84827e+08	2.24533e+07	1.84028e+07	346580	317532	379750	2.33847e+06	3.59597e+06	8.03772e+07	8.76525e+07	5.92804e+06	5.35075e+06	3.18403e+06	4.05463e+07	1.54711e+09	2.99482e+07	1.77591e+09	1.50181e+09
TRUE	Eicosapentaenoyl PAF C-16	C44 H80 N O7 P	Full match	No results	No results	Full match	1.63	765.568	766.576	10.875	18	0		No MS2	[M+H]+1	5.16156e+08	7.9764e+06	4.06325e+08	4.71774e+08	4.06897e+08	4.80075e+08	3.41199e+06	4.88964e+08	6.83914e+08	5.53791e+08	1.91596e+08	1.13467e+07	2.93205e+09	2.81275e+09	1.52612e+09	3.83548e+08	4.07788e+06	2.11527e+09	1.43458e+09	1.98105e+06	2.11334e+06	1.91823e+06	4.25592e+08	4.02904e+08	5.82004e+08	1.31562e+09	6.60756e+08	6.98879e+08	6.30648e+07	2.22052e+09	5.35367e+08	8.41926e+06	6.37625e+08	4.39151e+08
TRUE		C45 H80 N5 O4 P	Full match	No results	No results	No match	-0.32	785.595	786.602	13.845	69	0		No MS2	[M+H]+1	2.41033e+08	7.48627e+06	9.41703e+08	4.72846e+08	7.28679e+08	9.36673e+08	8.87676e+06	4.59075e+08	1.10108e+09	2.4152e+09	1.3381e+09	1.26896e+07	1.29055e+09	2.12129e+09	2.04979e+09	1.58033e+09	1.44642e+07	2.04198e+09	1.85047e+09	1.15465e+06	1.37523e+06	1.55301e+06	9.16261e+08	6.09497e+08	1.21378e+09	1.85696e+09	1.86389e+09	2.34776e+09	6.74162e+08	1.33764e+09	1.40729e+09	5.8854e+06	6.43469e+08	8.85155e+08
TRUE		C43 H78 N5 O4 P	Full match	No results	No results	No match	0.18	759.579	760.587	13.012	52	0		No MS2	[M+H]+1	8.51942e+08	1.54987e+07	1.2473e+09	7.70839e+08	1.07326e+09	1.20251e+09	2.32216e+07	2.92669e+09	7.11227e+08	1.94841e+09	1.24273e+09	1.98412e+07	4.01339e+08	6.75139e+08	1.69392e+09	1.06175e+09	1.52678e+07	1.17855e+09	9.51032e+08	857243	772979	768533	1.05042e+09	7.71927e+08	1.78826e+09	7.27359e+08	8.34847e+08	7.71533e+08	1.31617e+08	1.08517e+09	1.395e+09	1.87626e+07	5.19013e+08	1.0775e+09
TRUE		C40 H66 N6 O3 P2	Full match	No results	No results	No results	4.34	740.47	741.478	11.071	0	0		No MS2	[M+H]+1	7.47285e+07	1.00539e+08	4.91586e+07	6.3441e+06	3.37622e+07	4.83338e+07	1.67561e+07	2.39614e+07	1.04426e+08	1.40212e+07	5.71966e+08	2.45919e+08	6.21047e+08	2.81316e+07	1.51702e+08	1.49473e+09	2.42615e+07	1.17228e+08	2.17809e+08	515102	527814	537963	1.23502e+07	1.61543e+07	3.27997e+07	1.94124e+07	1.61061e+07	1.69909e+07	3.8312e+07	5.72352e+07	8.36676e+07	3.17339e+08	5.29234e+07	8.89111e+07
TRUE	Acetylcholine	C7 H15 N O2	No results	Full match	No results	Partial match	1.57	145.111	184.074	0.975	5	1	9.1	DDA for preferred ion	[M+K]+1	7.51312e+08	1.28093e+09	8.88907e+08	1.58381e+09	1.48319e+08	1.17682e+09	7.95833e+08	8.94649e+08	1.31749e+09	2.87649e+09	5.57525e+07	9.05635e+06	8.84932e+07	4.74084e+07	4.09431e+07	2.62462e+07	6.61937e+07	5.36429e+07	7.31856e+07	23108.1	23308.3	24526.4	2.11895e+08	2.27046e+08	2.24483e+08	1.92469e+08	2.21692e+08	2.22686e+08	2.0218e+08	1.52857e+07	5.95837e+08	1.24584e+09	8.29111e+08	7.84703e+08
TRUE		C5 H14 N O4 P	Full match	No results	No results	No results	2.06	183.066	184.074	0.989	0	0		DDA for other ion	[M+H]+1	7.51312e+08	1.28093e+09	8.88907e+08	1.58381e+09	1.48319e+08	1.17682e+09	7.95833e+08	8.94649e+08	1.31749e+09	2.87649e+09	5.57525e+07	9.05635e+06	8.84932e+07	4.74084e+07	4.09431e+07	2.62462e+07	6.61937e+07	5.36429e+07	7.31856e+07	27937.2	26555.6	29651.9	2.11895e+08	2.27046e+08	2.24483e+08	1.92469e+08	2.21692e+08	2.22686e+08	2.0218e+08	1.52857e+07	5.95837e+08	1.24584e+09	8.29111e+08	7.84703e+08
TRUE		C25 H42 N6 O5	Full match	No results	No results	No match	4.06	506.324	507.331	10.81	2	0		DDA for preferred ion	[M+H]+1	1.22368e+09	9.65312e+08	8.43821e+08	2.86714e+08	5.55176e+08	6.97869e+08	3.00354e+08	5.0725e+08	5.3205e+08	4.7136e+08	1.12862e+09	1.02811e+09	1.61131e+09	6.68098e+08	1.50602e+09	1.25093e+09	5.64386e+08	6.05387e+08	1.98542e+09	2.04918e+07	1.4496e+07	1.46434e+07	3.84551e+08	4.02747e+08	3.77829e+08	3.51663e+08	3.88714e+08	4.26583e+08	3.76602e+08	1.32832e+09	4.65182e+08	1.41184e+09	8.49402e+08	8.69511e+08
TRUE		C25 H42 N6 O5	Full match	No results	No results	No match	2.36	506.323	507.33	10.942	2	0		DDA for preferred ion	[M+H]+1	1.22368e+09	9.65312e+08	8.43821e+08	2.86714e+08	5.55176e+08	6.97869e+08	3.00354e+08	5.0725e+08	5.3205e+08	4.7136e+08	1.12862e+09	1.02811e+09	6.72706e+08	2.21724e+08	1.50602e+09	1.25473e+09	5.64386e+08	6.05387e+08	1.98542e+09	1.03079e+07	1.03028e+07	1.10901e+07	3.84551e+08	1.06549e+08	9.51016e+07	3.51663e+08	1.10214e+08	1.32075e+08	3.76602e+08	1.32832e+09	4.65182e+08	1.41184e+09	8.49402e+08	8.69511e+08
TRUE		C17 H32 N6 O2	Full match	No results	No results	No match	2.89	352.26	353.267	11.508	11	0		DDA for preferred ion	[M+H]+1	1.37749e+09	9.20663e+08	1.24608e+09	1.24084e+09	1.10367e+09	1.69508e+09	1.40712e+09	1.40765e+09	1.4974e+09	1.23036e+09	1.3704e+09	1.57498e+09	1.26011e+09	1.23652e+09	1.51408e+09	1.58698e+09	1.71907e+09	1.8444e+09	1.44629e+09	1.78276e+08	1.65544e+08	1.73417e+08	1.36087e+09	1.48642e+09	1.24274e+09	1.23746e+09	1.57477e+09	1.29626e+09	1.24165e+09	1.19898e+09	1.02382e+09	1.21142e+09	7.61645e+08	7.88155e+08
TRUE		C45 H80 N5 O4 P	Full match	No results	No results	No match	-0.13	785.595	786.602	13.212	69	0		No MS2	[M+H]+1	4.4177e+08	3.66269e+07	7.27068e+08	6.86161e+08	5.57051e+08	2.62946e+08	3.59917e+07	1.54333e+09	7.97859e+08	8.62659e+08	6.28913e+08	2.35382e+07	3.14237e+08	1.22237e+09	5.62265e+08	1.12052e+09	5.88452e+07	6.84341e+08	6.20569e+08	1.21363e+06	1.25253e+06	1.2727e+06	5.57449e+08	1.94944e+08	4.84032e+08	2.56062e+08	8.13545e+08	8.55775e+08	1.89855e+09	5.38842e+08	9.61491e+08	5.21377e+07	1.15443e+09	7.8002e+08
TRUE		C40 H68 N9 P	Full match	No results	No results	No match	-1.73	705.532	706.54	13.261	34	0		No MS2	[M+H]+1	1.06882e+06	7.11249e+08	3.30045e+08	8.13398e+08	2.90625e+08	945573	1.36728e+09	7.20374e+08	6.62229e+08	1.55695e+09	1.5915e+06	9.34923e+08	1.23904e+09	9.62508e+08	1.71089e+09	1.0942e+06	1.20696e+09	1.03443e+09	1.17205e+09	569195	614190	557285	5.23577e+08	936852	867747	783832	752157	698022	901819	2.151e+08	883406	1.7904e+09	1.13494e+08	1.01604e+09
TRUE		C53 H99 N7 O14 P2	Full match	No results	No results	No results	-0.06	1119.67	560.844	8.84	0	0		DDA for other ion	[M+2H]+2	5.98435e+07	4.84274e+07	1.10244e+07	1.3304e+07	9.29433e+06	2.13108e+07	1.22152e+07	1.86131e+07	1.3945e+07	1.92933e+07	2.53482e+08	1.06879e+08	3.38716e+07	4.89301e+07	1.40348e+07	2.16631e+08	1.36684e+07	2.35352e+07	3.02633e+07	6.65868e+06	6.26252e+06	1.04292e+07	3.07699e+07	3.70639e+07	3.39207e+07	4.38251e+07	3.3998e+07	3.28412e+07	3.68139e+07	1.42553e+07	1.94728e+07	1.38176e+07	1.29001e+08	4.27736e+08
TRUE		C36 H80 N8 O6 P2	Full match	No results	No results	No match	-0.93	782.567	783.574	14.278	1	0		No MS2	[M+H]+1	5.33948e+06	2.15374e+09	1.39382e+09	2.68383e+09	1.26913e+09	4.7368e+06	2.24496e+09	8.26512e+08	1.88413e+09	2.18927e+09	8.12879e+07	1.78269e+09	2.0506e+09	1.35739e+09	1.33945e+09	4.51534e+07	1.63294e+09	1.03065e+09	1.58821e+09	621253	561663	719769	7.31146e+08	5.08025e+06	7.26324e+06	3.69757e+06	2.11148e+06	5.11445e+06	1.9337e+06	1.16127e+09	4.72339e+06	2.05653e+09	8.37245e+08	2.13238e+09
TRUE	Oleic acid	C18 H34 O2	Full match	Full match	Full match	Full match	0.24	282.256	281.249	12.259	60	3	10	DDA for preferred ion	[M-H]-1	1.04315e+09	1.57255e+09	5.73065e+08	3.44939e+08	1.10443e+08	2.23872e+08	1.51263e+08	1.3696e+09	6.67887e+08	7.10613e+08	1.01925e+09	1.04026e+09	7.28158e+08	4.10946e+08	9.8875e+08	5.92866e+08	5.82007e+08	2.42096e+09	6.80446e+08	3.24641e+06	3.35324e+06	2.5592e+06	9.47376e+07	1.02118e+08	7.89149e+07	8.72675e+07	8.41671e+07	7.49654e+07	8.75611e+07	4.0853e+08	1.59356e+09	6.00842e+08	1.42689e+09	1.05654e+09
TRUE		C32 H48 N3 O P	Full match	No results	No results	No results	-3.09	521.352	544.341	10.968	0	0		DDA for other ion	[M+Na]+1	9.82762e+08	1.08609e+09	1.51448e+09	3.72175e+08	6.17612e+08	4.62353e+08	2.46624e+08	6.22784e+08	8.10298e+08	1.2904e+09	1.75807e+09	6.94103e+08	4.45794e+08	2.738e+08	1.20848e+08	3.58541e+08	2.35851e+08	1.44981e+08	1.89613e+08	352186	378020	399423	5.31101e+07	5.36147e+07	4.90094e+07	4.86473e+07	4.86516e+07	6.84342e+07	5.61069e+07	1.16136e+09	1.956e+09	1.52636e+09	1.90238e+09	2.7635e+09
TRUE	1-arachidonoyl-sn-glycero-3-phosphocholine	C28 H50 N O7 P	Full match	No results	No results	Full match	2.12	543.334	544.341	10.974	3	0		DDA for preferred ion	[M+H]+1	9.82762e+08	1.08609e+09	1.51448e+09	3.72175e+08	6.17612e+08	4.62353e+08	2.46624e+08	6.22784e+08	8.10298e+08	1.2904e+09	1.75807e+09	6.94103e+08	4.45794e+08	2.738e+08	1.20848e+08	3.58541e+08	2.35851e+08	1.44981e+08	1.89613e+08	310211	332966	351818	5.31101e+07	5.36147e+07	4.90094e+07	4.86473e+07	4.86516e+07	6.84342e+07	5.61069e+07	1.16136e+09	1.956e+09	1.52636e+09	1.90238e+09	2.7635e+09
TRUE	Laudanosine	C21 H27 N O4	Full match	Full match	Partial match	Full match	2.11	357.195	358.202	7.586	4	1	95.1	DDA for preferred ion	[M+H]+1	4.5046e+08	1.50203e+09	8.82374e+08	1.92056e+08	768773	3.92799e+08	4.57605e+08	1.35567e+09	1.06455e+09	1.06067e+09	2.02398e+08	1.03321e+09	6.94782e+08	1.17565e+09	1.12203e+07	5.28763e+08	1.93319e+08	8.91725e+08	5.65772e+08	92348.8	56418.7	80758.6	4.7385e+07	5.20243e+07	1.08443e+08	1.10612e+08	8.65675e+07	1.14644e+08	9.7089e+07	9.66314e+08	2.02995e+09	5.85631e+08	1.69199e+09	2.15578e+09
TRUE		C8 H4 O3	Full match	No results	No results	No results	1.97	148.016	149.024	12.709	0	0		No MS2	[M+H]+1	3.60924e+08	3.14514e+08	3.1067e+08	3.42341e+08	3.38596e+08	3.72969e+08	3.34002e+08	2.96867e+08	3.12664e+08	3.32671e+08	3.81025e+08	3.36054e+08	2.93143e+08	2.92837e+08	3.01625e+08	4.99277e+08	3.71034e+08	3.21718e+08	3.41389e+08	3.64874e+08	3.54109e+08	3.44012e+08	2.95599e+08	3.20971e+08	3.13343e+08	3.26783e+08	3.24682e+08	3.13514e+08	3.85181e+08	3.34346e+08	3.92872e+08	3.47326e+08	4.86628e+08	3.40736e+08
TRUE		C45 H76 N5 O4 P	Full match	No results	No results	No match	0.48	781.564	782.571	13.904	62	0		No MS2	[M+H]+1	2.53197e+07	7.09462e+08	4.13572e+08	1.1342e+09	2.88359e+08	2.8399e+07	1.04532e+08	1.36062e+08	6.20751e+08	7.52074e+08	4.53297e+07	8.9746e+08	9.26142e+08	4.16054e+08	4.45941e+08	2.23557e+07	7.12263e+08	4.62208e+08	6.38204e+08	1.27605e+06	1.44804e+06	1.63523e+06	1.21401e+08	2.10712e+07	3.95017e+07	1.96607e+07	2.37202e+07	3.06794e+07	4.37734e+07	3.83359e+08	2.07988e+07	1.15927e+09	2.58891e+08	1.48562e+09
TRUE	2-methylbutyrylcarnitine	C12 H23 N O4	Full match	No results	No results	Full match	2.14	245.163	246.171	5.351	5	0		DDA for preferred ion	[M+H]+1	2.13859e+08	9.16151e+08	1.84589e+08	1.0384e+08	1.20333e+08	1.29747e+08	8.01998e+07	8.4509e+07	6.71385e+08	1.3124e+08	1.34802e+08	6.13012e+07	7.30439e+07	3.19981e+07	3.54931e+07	1.90771e+07	6.25795e+07	4.86054e+07	1.51229e+07	500514	553477	502953	1.81001e+07	1.92241e+07	1.82781e+07	1.65723e+07	1.93943e+07	1.96555e+07	1.77253e+07	7.20196e+07	4.78855e+08	2.76196e+07	3.78103e+08	4.97941e+08
TRUE		C46 H54 N6 O10	Full match	No results	No results	No results	1.71	850.392	851.399	9.612	0	0		DDA for preferred ion	[M+H]+1	2.53014e+09	1.59843e+09	1.92413e+09	2.08976e+09	1.07477e+09	2.14515e+09	2.02306e+09	1.88104e+09	1.69131e+09	1.7251e+09	1.51192e+09	4.34202e+07	1.82686e+09	1.72495e+09	2.01466e+09	2.00846e+09	2.01531e+09	2.68074e+09	1.99997e+09	282270	307904	281732	2.0268e+09	1.49084e+09	1.738e+09	1.49553e+09	1.74727e+09	1.70432e+09	1.71134e+09	2.1443e+09	2.04816e+09	2.64816e+09	1.50149e+09	2.46345e+09
TRUE		C27 H54 N6 O7	Full match	No results	No results	No results	2.73	574.407	575.414	11.081	0	0		DDA for preferred ion	[M+H]+1	8.30504e+07	6.80173e+08	9.83426e+07	1.63553e+08	1.33323e+08	1.7969e+08	1.64524e+08	2.67931e+09	4.6274e+07	2.26796e+08	2.286e+08	1.16482e+09	2.18641e+08	7.63662e+08	6.8058e+08	6.06767e+08	5.31456e+08	1.37583e+08	1.15628e+08	1.53848e+07	1.61973e+07	1.61584e+07	4.57251e+07	4.97076e+07	4.73373e+07	5.32222e+07	5.82155e+07	5.46713e+07	5.67587e+07	5.00864e+08	4.55385e+08	2.86805e+08	1.57921e+08	7.03254e+07
TRUE		C41 H81 N3 O4 P2	Full match	No results	No results	No match	-1.4	741.569	742.577	11.501	10	0		No MS2	[M+H]+1	2.22087e+08	1.497e+06	4.93118e+07	2.31142e+07	3.72945e+07	6.49457e+07	1.27884e+06	4.56873e+07	7.9269e+07	4.50387e+08	1.09111e+08	1.71409e+06	1.83737e+09	1.40747e+09	2.16641e+09	4.06538e+08	2.55823e+06	2.66913e+09	1.33909e+09	936249	879791	868449	2.17415e+08	4.40866e+06	1.67811e+07	1.02422e+09	2.60171e+08	4.52297e+07	1.43247e+08	7.77033e+08	1.14053e+08	1.32908e+06	1.65328e+08	1.20841e+08
TRUE		C38 H79 N5 O7 P2	Full match	No results	No results	No match	-0.49	779.545	780.552	14.437	57	0		No MS2	[M+H]+1	8.82866e+06	1.9314e+09	1.20811e+09	1.48906e+09	1.72036e+09	7.20884e+06	1.63173e+09	1.7376e+09	1.96959e+09	1.3823e+09	2.20659e+07	2.32398e+09	2.09054e+09	2.28708e+09	2.04187e+09	8.80909e+06	2.65993e+09	2.00379e+09	1.72358e+09	1.13291e+06	1.02099e+06	1.07057e+06	1.08662e+09	3.47135e+06	1.05879e+07	1.54686e+07	5.97361e+06	1.27227e+07	2.13275e+07	1.71468e+09	8.23218e+06	2.08693e+09	1.51469e+09	1.77371e+09
TRUE		C37 H73 N9 O3 P2	Full match	No results	No results	No match	-2.3	753.529	754.537	13.807	61	0		No MS2	[M+H]+1	2.27078e+06	7.94312e+08	5.8668e+08	5.74525e+08	6.93961e+08	2.17309e+06	6.52132e+08	5.94873e+08	3.83172e+08	9.61745e+08	6.34985e+06	3.92477e+08	9.00495e+08	7.25739e+08	6.65404e+08	2.82329e+06	6.27586e+08	5.82895e+08	5.99021e+08	1.55341e+06	1.85016e+06	2.08934e+06	5.6797e+08	2.20053e+06	2.10982e+06	2.05207e+06	2.16598e+06	2.10229e+06	1.91319e+06	7.18918e+08	2.20672e+06	1.36361e+09	2.28491e+08	1.15877e+09
TRUE	7-Methyl-2,6,9,12-tetraoxahexadecane	C13 H28 O4	Full match	No results	No results	Full match	2.54	248.199	271.189	9.572	1	0		DDA for other ion	[M+Na]+1	3.98321e+08	2.61852e+09	6.83579e+08	9.94582e+07	2.61238e+08	1.13891e+08	7.00143e+07	3.72905e+08	4.16209e+07	9.39737e+07	8.50655e+08	2.56737e+09	8.10318e+08	1.20879e+08	4.88687e+07	4.59721e+07	5.19843e+07	4.11258e+07	4.24803e+07	6.17071e+06	8.13699e+06	5.23012e+06	1.78952e+07	1.61604e+07	1.75337e+07	2.17243e+07	1.58379e+07	1.67441e+07	1.65082e+07	3.57262e+08	1.90004e+09	5.29126e+08	7.09718e+08	1.74299e+08
TRUE		C11 H22 N6 O2	Full match	No results	No results	No results	3.08	270.181	271.189	9.57	0	0		DDA for preferred ion	[M+H]+1	3.98321e+08	2.61852e+09	6.83579e+08	9.94582e+07	2.61238e+08	1.13891e+08	7.00143e+07	3.72905e+08	4.16209e+07	9.39737e+07	8.50655e+08	2.56737e+09	8.10318e+08	1.20879e+08	4.88687e+07	4.59721e+07	5.19843e+07	4.11258e+07	4.24803e+07	6.17071e+06	8.13699e+06	5.23012e+06	1.78952e+07	1.61604e+07	1.75337e+07	2.17243e+07	1.58379e+07	1.67441e+07	1.65082e+07	3.57262e+08	1.90004e+09	5.29126e+08	7.09718e+08	1.74299e+08
TRUE	4-Undecylbenzenesulfonic acid	C17 H28 O3 S	Full match	No results	No results	Full match	1.24	312.176	311.169	14.29	1	0		DDA for preferred ion	[M-H]-1	6.85765e+08	2.34686e+08	1.53823e+08	1.9545e+08	1.33233e+08	3.18711e+08	1.87175e+08	2.0423e+08	1.79707e+08	1.25647e+08	4.10108e+08	1.92471e+09	6.66009e+08	6.74515e+08	4.6323e+08	1.01316e+09	7.02917e+08	5.20534e+08	5.64933e+08	1.21398e+08	9.5605e+07	1.3697e+08	1.99273e+08	1.1327e+08	9.21479e+07	2.36137e+08	2.55551e+08	2.63714e+08	4.734e+08	1.71959e+09	2.61848e+09	5.29037e+08	7.93384e+08	5.43989e+08
TRUE	Arachidonic acid	C20 H32 O2	Full match	Full match	Partial match	Full match	0.41	304.24	303.233	11.68	58	3	96.4	DDA for preferred ion	[M-H]-1	8.05332e+08	1.38454e+09	1.25541e+09	5.33891e+08	3.05615e+08	6.26979e+08	3.3232e+08	6.22573e+08	8.31166e+08	9.59279e+08	4.14442e+08	4.32896e+08	3.489e+08	2.55738e+08	5.59658e+08	2.82664e+08	5.70497e+08	7.11083e+08	3.30517e+08	31894.9	29907	29501	1.8379e+08	1.62582e+08	1.66213e+08	1.49708e+08	1.50507e+08	1.85421e+08	2.25075e+08	2.94355e+08	1.52348e+09	7.41325e+08	1.42496e+09	1.65965e+09
TRUE	2-palmitoyl-sn-glycero-3-phosphocholine	C24 H50 N O7 P	Full match	No results	No results	Full match	1.98	495.333	496.341	11.105	6	0		DDA for preferred ion	[M+H]+1	1.07777e+09	2.46705e+09	1.55628e+09	6.11327e+08	4.8752e+08	4.86276e+08	6.6011e+08	8.8841e+08	8.06581e+08	1.41268e+09	1.13807e+09	3.89597e+08	7.13555e+08	4.26884e+08	1.21524e+08	2.91174e+08	4.86818e+08	2.35907e+08	1.99288e+08	408869	371531	421447	8.01771e+07	9.05349e+07	7.49842e+07	9.40234e+07	8.27865e+07	9.65801e+07	9.75363e+07	1.42867e+09	1.71091e+09	1.44217e+09	1.71394e+09	1.74394e+09
TRUE		C26 H45 N2 O P	Full match	No results	No results	No match	-3.8	432.325	496.341	11.097	57	0		DDA for other ion	[M+ACN+Na]+1	1.07777e+09	2.46705e+09	1.55628e+09	6.11327e+08	4.8752e+08	4.86276e+08	6.6011e+08	8.8841e+08	8.06581e+08	1.41268e+09	1.13807e+09	3.89597e+08	7.13555e+08	4.26884e+08	1.21524e+08	2.91174e+08	4.86818e+08	2.35907e+08	1.99288e+08	389234	398840	406509	8.01771e+07	9.05349e+07	7.49842e+07	9.40234e+07	8.27865e+07	9.65801e+07	9.75363e+07	1.42867e+09	1.71091e+09	1.44217e+09	1.71394e+09	1.74394e+09
TRUE	(2E)-hexadecenoylcarnitine	C23 H43 N O4	Full match	No results	No results	Full match	2.02	397.32	398.327	9.608	3	0		DDA for preferred ion	[M+H]+1	4.68892e+08	2.39999e+08	4.58611e+08	1.44465e+08	2.56855e+09	1.31602e+08	2.05335e+08	1.45607e+08	3.16255e+08	1.62634e+08	1.40572e+08	1.19071e+08	9.9211e+07	4.64626e+07	1.30973e+07	4.34917e+07	2.93913e+07	2.67124e+07	7.40679e+07	185758	202627	185404	4.09756e+07	3.57495e+07	3.84986e+07	4.80354e+07	4.01904e+07	4.51853e+07	4.96029e+07	2.59574e+08	6.80376e+08	9.99376e+08	8.74559e+08	1.13697e+09
TRUE	Nicotinamide	C6 H6 N2 O	Full match	Full match	Full match	Partial match	2.77	122.048	123.056	1.127	4	1	71.8	DDA for preferred ion	[M+H]+1	8.53917e+08	1.51058e+09	1.4775e+09	8.38747e+08	7.24089e+08	1.10001e+09	6.6438e+08	1.14375e+09	8.57238e+08	1.22441e+09	6.48725e+08	5.6637e+08	5.4064e+08	6.92718e+08	4.4469e+08	5.44234e+08	6.36203e+08	5.53202e+08	5.29449e+08	3.1189e+06	2.92627e+06	3.26996e+06	2.43361e+08	2.67336e+08	2.74002e+08	2.77242e+08	2.83684e+08	3.38835e+08	2.82361e+08	4.7443e+08	2.54453e+09	1.05916e+09	1.79631e+09	1.88476e+09
TRUE	2-methylbutyrylcarnitine	C12 H23 N O4	Full match	No results	No results	Full match	2.11	245.163	246.171	5.021	5	0		DDA for preferred ion	[M+H]+1	2.37313e+08	8.62248e+08	1.49039e+08	8.54481e+07	1.07542e+08	1.12264e+08	6.70246e+07	7.14879e+07	5.91329e+08	1.10396e+08	1.21488e+08	5.54888e+07	6.49629e+07	2.83401e+07	3.22981e+07	1.6738e+07	5.72075e+07	4.30679e+07	1.34061e+07	391043	344923	370065	1.56302e+07	1.61187e+07	1.56798e+07	1.43664e+07	1.63968e+07	1.65947e+07	1.61027e+07	6.22878e+07	4.02391e+08	3.06011e+07	3.22755e+08	4.06031e+08
TRUE		C36 H77 N4 O8 P	Full match	No results	No results	No results	3.85	724.551	725.558	12.807	0	0		No MS2	[M+H]+1	1.70118e+06	1.15969e+09	8.57021e+08	8.21034e+08	1.25561e+09	1.71031e+06	2.13791e+09	1.11048e+09	1.33403e+09	7.85162e+08	2.15209e+06	8.93483e+08	1.27219e+09	1.204e+09	1.39476e+09	2.21539e+06	1.38005e+09	1.03961e+09	7.76624e+08	1.39887e+06	1.43391e+06	1.49295e+06	7.79441e+08	1.59166e+06	1.48841e+06	1.59337e+06	1.52808e+06	1.49257e+06	1.65541e+06	9.58323e+08	2.1554e+06	1.5852e+09	4.59892e+08	9.80154e+08
TRUE	NP-014287	C18 H32 O3	Full match	Full match	No results	Partial match	1.83	296.236	319.225	10.656	56	5	8.9	DDA for other ion	[M+Na]+1	4.37273e+07	5.46527e+07	2.93566e+07	6.56791e+07	1.09451e+08	5.08149e+07	1.19629e+08	7.59666e+07	7.71908e+07	6.66325e+07	6.94654e+07	5.33206e+07	5.16931e+07	2.93655e+07	4.16636e+07	5.06851e+07	7.10329e+07	3.83516e+07	3.68201e+07	4.74597e+07	5.16056e+07	1.74637e+07	4.84665e+07	3.31611e+07	2.93486e+07	2.87067e+07	2.8359e+07	2.96824e+07	1.82087e+07	8.93277e+07	2.90587e+07	4.03367e+07	5.30989e+08	2.25776e+08
TRUE		C16 H29 O4 P	Full match	No results	No results	No match	-2.54	316.18	317.187	7.142	2	0		DDA for other ion	[M+H]+1	4.54662e+06	4.00765e+06	1.49531e+06	808754	727102	991504	1.82465e+08	2.14726e+06	1.36e+06	2.89667e+06	559029	376124	247596	672539	359200	666046	2.43668e+09	367400	380927	99534.5	102496	128270	4.47207e+06	5.33997e+06	4.87356e+06	5.05609e+06	4.21943e+06	4.75986e+06	3.39951e+06	536511	7.92727e+06	2.4856e+06	6.52104e+06	7.83389e+06
TRUE		C24 H40 N10 O	Full match	No results	No results	No match	4.92	484.341	485.348	10.871	2	0		DDA for other ion	[M+H]+1	2.43237e+08	1.96876e+08	1.47646e+08	2.55196e+07	5.68319e+07	1.05319e+08	2.94095e+07	1.1453e+08	8.65162e+07	5.27348e+07	4.19604e+08	6.60335e+08	7.03671e+08	7.45156e+07	3.09608e+08	1.61476e+09	6.35561e+07	1.20039e+08	4.78938e+08	455239	869459	648756	3.56644e+07	3.55632e+07	3.46483e+07	2.99774e+07	3.92427e+07	4.05279e+07	3.44897e+07	3.00144e+08	1.00254e+08	3.66412e+08	1.40644e+08	1.86113e+08
TRUE	Putaminoxin	C12 H20 O3	No results	No results	Partial match	Full match	3.57	212.142	447.274	8.926	21	0		DDA for other ion	[2M+Na]+1	7.14174e+07	1.02269e+08	4.91553e+06	8.89776e+06	5.52445e+06	1.80465e+07	7.05248e+06	1.29727e+07	7.89495e+06	2.11625e+07	2.85055e+08	1.10245e+08	1.00749e+07	6.09528e+07	3.67331e+07	4.12974e+08	8.88703e+06	1.837e+07	2.68122e+07	4.62517e+06	2.76611e+06	2.87196e+06	401741	3.82666e+07	4.85823e+07	3.99223e+07	4.45481e+07	4.39031e+07	4.10866e+07	5.30848e+06	1.26255e+07	1.04267e+07	1.50449e+08	6.06366e+08
TRUE		C38 H79 N5 O9 P2	Full match	No results	No results	No match	-0.36	811.535	812.542	13.296	22	0		No MS2	[M+H]+1	2.93986e+07	1.23525e+06	1.27117e+07	5.39186e+06	2.19714e+07	1.90219e+07	6.72199e+07	2.73165e+07	2.2e+07	1.99169e+07	6.39079e+07	3.76506e+07	6.27907e+07	1.57569e+07	4.81743e+06	1.01405e+07	2.83949e+07	8.68926e+06	4.64833e+07	576003	560997	620961	859864	741444	719502	717336	963117	690969	1.50681e+06	3.22129e+07	3.4328e+07	4.19085e+06	7.73921e+08	7.22092e+07
TRUE	DPPI	C41 H79 O13 P	No results	No results	No results	Full match	-3.27	810.523	811.53	13.273	10	0		No MS2	[M+H]+1	6.91334e+06	2.11093e+06	2.49983e+06	892481	2.73506e+06	3.99961e+06	1.02783e+07	9.52686e+06	6.52197e+06	9.71018e+06	1.59129e+07	3.9237e+07	9.63544e+06	7.60739e+06	2.18807e+06	1.12637e+07	2.3985e+07	3.44045e+06	1.21608e+07	430766	417017	421024	643052	690509	2.29998e+07	1.72058e+06	486144	511125	9.39532e+06	2.5632e+06	5.09084e+06	2.89097e+06	6.59239e+07	7.38786e+07
TRUE	[Similar to: N1-{5-[(4-chlorophenyl)thio]-4-fluoro-2-nitrophenyl}acetamide; ΔMass: 0.1989 Da]	C19 H32 O3 S	Full match	Invalid mass	No results	No results	0.58	340.207	339.2	9.542	0	1		DDA for preferred ion	[M-H]-1	2.7081e+07	5.47041e+08	7.42817e+08	9.39692e+08	6.78733e+08	3.20777e+07	2.28014e+08	7.94319e+08	7.5256e+08	3.77531e+08	3.39888e+07	1.01176e+09	2.40363e+09	9.11035e+08	1.21188e+09	3.21983e+07	6.0675e+08	6.50641e+08	3.91727e+08	2.53086e+07	2.01626e+07	2.29111e+07	1.07427e+08	3.78194e+07	5.78275e+07	4.2369e+07	3.32446e+07	3.7248e+07	3.40593e+07	1.26335e+08	2.27643e+07	1.12355e+09	3.90126e+08	7.05312e+08
TRUE		C18 H45 N10 O4 P	Full match	No results	No results	Invalid mass	2.89	496.338	497.345	11.495	5	0		No MS2	[M+H]+1	5.04771e+06	1.25563e+09	2.1259e+07	6.78987e+08	9.38242e+06	7.74754e+06	7.5499e+08	9.22132e+08	8.96835e+08	1.69808e+07	1.17949e+09	6.56951e+08	8.28152e+08	5.36007e+08	2.00713e+08	6.88123e+06	6.79061e+08	1.71541e+06	3.44319e+08	729092	685126	676293	1.97443e+06	4.12583e+06	2.72981e+06	1.73616e+08	1.2954e+08	1.56119e+08	1.55525e+08	1.23361e+09	2.33831e+07	1.25743e+09	1.39088e+09	1.52056e+09
TRUE	xestoaminol C	C14 H31 N O	Full match	No results	No results	Full match	1.94	229.241	230.248	9.093	1	0		DDA for preferred ion	[M+H]+1	1.06675e+09	6.33715e+08	5.87441e+08	9.13363e+08	7.84021e+08	1.26307e+09	9.76974e+08	6.55303e+08	1.03756e+09	9.66104e+08	9.49722e+08	1.42312e+09	1.16486e+09	8.42388e+08	4.37868e+08	5.20285e+08	5.49165e+08	4.77165e+08	8.35668e+08	2.97515e+07	3.38107e+07	2.8808e+07	2.04436e+08	2.2486e+08	1.8954e+08	2.33436e+08	2.09799e+08	2.27325e+08	2.42308e+08	1.20935e+09	8.61024e+08	6.63674e+08	2.1443e+09	9.30805e+08
TRUE		C26 H36 N10 O2 P2	Full match	No results	No results	No match	-1.3	582.249	583.256	9.801	4	0		No MS2	[M+H]+1	3.17237e+08	6.12973e+08	9.6802e+08	8.66371e+07	1.4294e+06	4.05832e+07	4.88349e+06	1.4102e+08	1.22013e+08	3.47109e+08	5.37424e+06	7.6875e+06	2.54047e+06	8.08857e+06	5.04834e+06	2.77218e+06	2.68818e+06	4.75159e+06	3.25866e+06	130329	145452	153771	2.86374e+06	2.3667e+06	3.00704e+06	2.79358e+06	2.96451e+06	4.31116e+06	4.93117e+06	2.13798e+07	2.359e+09	4.63189e+07	4.62551e+08	6.31005e+08
TRUE		C41 H81 N3 O4 P2	Full match	No results	No results	No match	-1.42	741.569	742.577	11.315	10	0		No MS2	[M+H]+1	6.65862e+06	2.07418e+06	2.31184e+06	1.4631e+06	2.42073e+06	1.94708e+06	1.36199e+06	1.7428e+06	2.42977e+06	1.52812e+07	6.83824e+06	1.82697e+06	1.57981e+09	5.99924e+08	2.35995e+09	1.62949e+08	1.75882e+06	1.26364e+09	1.38664e+09	917180	875538	978890	2.54429e+07	1.26113e+06	1.12182e+06	3.95997e+08	3.57969e+07	3.58814e+06	2.98373e+08	4.46694e+08	5.74523e+07	1.63895e+06	6.82795e+07	2.5573e+07
TRUE	hypaphorine	C14 H18 N2 O2	Full match	No results	No results	Full match	2.08	246.137	247.145	5.519	1	0		DDA for preferred ion	[M+H]+1	1.65462e+08	8.53353e+08	2.16515e+08	2.06154e+08	8.77106e+07	9.17095e+07	4.14563e+07	4.72694e+08	1.32847e+07	1.9694e+08	4.43193e+07	1.74481e+08	2.63155e+07	5.76222e+07	5.33443e+07	4.22376e+07	1.91344e+07	4.65363e+06	4.56903e+07	294667	315503	286703	2.5963e+07	3.30578e+07	2.74209e+07	2.192e+07	3.28008e+07	2.59409e+07	2.12206e+07	7.44714e+08	5.87172e+08	1.43058e+08	4.65809e+08	7.58802e+08
TRUE		C41 H79 N3 O5 P2	Full match	No results	No results	No match	-2.1	755.548	756.555	13.204	48	0		No MS2	[M+H]+1	3.54613e+06	5.96627e+08	4.75175e+08	3.69449e+08	3.61492e+08	1.00221e+07	2.66733e+08	4.46301e+08	4.49128e+08	4.8289e+08	2.96605e+07	1.23128e+09	7.6297e+08	1.1353e+09	1.64967e+09	1.23266e+07	9.23245e+08	1.636e+09	5.81981e+08	1.07525e+06	1.10971e+06	1.12758e+06	1.52151e+08	4.88567e+06	1.46161e+07	4.51559e+06	8.02742e+06	5.35608e+06	1.8557e+06	8.88547e+08	1.27349e+07	1.00585e+09	1.29782e+08	5.40798e+08
TRUE		C27 H51 N O5	Full match	No results	No results	No results	1.74	469.378	470.385	9.95	0	0		DDA for preferred ion	[M+H]+1	2.73942e+08	4.49962e+08	1.57385e+08	8.24647e+07	1.59909e+08	5.18591e+07	7.29148e+07	1.67998e+08	1.53422e+08	1.79989e+08	1.41544e+07	3.98164e+06	1.12823e+07	3.45753e+06	1.87487e+06	3.1928e+06	6.5785e+06	1.47445e+06	2.78996e+06	264629	241167	306859	1.23387e+07	1.1834e+07	1.10391e+07	1.14407e+07	1.00555e+07	1.24905e+07	1.37927e+07	1.97715e+07	6.05773e+08	1.15336e+08	4.71695e+08	4.13305e+08
TRUE		C45 H78 N5 O3 P	Full match	No results	No results	No match	0.09	767.584	768.592	12.28	20	0		No MS2	[M+H]+1	4.67574e+08	2.11379e+07	1.16524e+09	9.09113e+08	1.07847e+09	3.73508e+08	8.00292e+06	1.52091e+09	9.18867e+08	8.59434e+08	6.26624e+08	1.03444e+07	1.47945e+09	1.23466e+09	2.01577e+09	2.23357e+08	5.41819e+06	2.32079e+09	1.26992e+09	721907	612277	732247	2.62045e+08	4.02036e+08	9.16049e+08	4.14862e+08	3.50403e+08	5.90663e+08	2.84701e+08	5.90298e+08	3.5765e+08	2.28879e+07	4.81192e+08	4.04267e+08
TRUE		C33 H52 N10 O3 S	Full match	No results	No results	No results	4.33	668.397	669.405	9.047	0	0		No MS2	[M+H]+1	3.90278e+06	6.69987e+06	3.14413e+07	1.16255e+07	3.04925e+07	3.51699e+07	3.10544e+06	1.9375e+07	3.19263e+07	3.71301e+07	1.84043e+07	7.38276e+06	5.96116e+07	3.06221e+07	4.79742e+07	2.0676e+07	2.61047e+07	2.68846e+07	3.35474e+07	1.21594e+06	808138	608858	4.75338e+06	3.7352e+06	5.4601e+06	2.86979e+06	7.73027e+06	4.44527e+06	3.70697e+06	1.9795e+07	5.25216e+06	1.99438e+07	4.26871e+07	4.40991e+07
TRUE	1-Palmitoyl-2-docosahexaenoyl-sn-glycero-3-phosphocholine	C46 H80 N O8 P	Full match	No results	No results	Full match	1.67	805.563	806.571	13.055	52	0		No MS2	[M+H]+1	8.55751e+06	2.25605e+09	6.075e+08	1.23948e+09	6.26813e+08	5.49563e+06	1.83561e+09	4.95566e+08	1.15036e+09	1.2429e+09	6.61401e+06	7.09827e+08	7.96273e+08	7.99476e+08	1.05656e+09	4.92095e+06	1.02054e+09	7.16274e+08	4.86203e+08	960123	883354	852952	2.78063e+08	6.07895e+06	1.54934e+07	5.05712e+06	1.02826e+07	9.8254e+06	3.13213e+06	5.28345e+08	1.19391e+07	1.74517e+09	4.5691e+08	1.48581e+09
TRUE	O-pentadecanoylcarnitine	C22 H43 N O4	Full match	No results	No results	Full match	1.88	385.32	386.327	9.587	1	0		No MS2	[M+H]+1	1.05039e+08	6.8967e+08	1.43545e+08	8.88363e+07	2.22926e+09	3.39791e+07	7.33034e+07	7.2343e+07	1.73163e+08	8.51295e+07	4.81547e+07	5.56494e+07	2.2268e+07	7.47199e+07	1.42496e+07	1.38268e+07	1.45376e+07	2.10455e+07	2.19949e+07	318168	368494	283935	1.7345e+07	1.64268e+07	1.76207e+07	1.94993e+07	1.68085e+07	2.02268e+07	2.27907e+07	5.97967e+07	4.28514e+08	1.33841e+08	2.44192e+08	4.60869e+08
TRUE		C39 H86 N7 O4 P3	Full match	No results	No results	No match	-0.97	809.595	810.602	13.202	46	0		DDA for preferred ion	[M+H]+1	1.41103e+08	7.48238e+07	9.23495e+07	4.20962e+07	2.04671e+08	4.88206e+07	4.37763e+06	1.92635e+08	3.62717e+08	1.96246e+08	6.30181e+07	4.62815e+06	4.98286e+07	9.58472e+07	1.56763e+08	3.01627e+08	1.66195e+08	8.97854e+07	6.93883e+07	1.01448e+06	1.04699e+06	1.06385e+06	2.00439e+07	2.43033e+08	1.67313e+08	4.11893e+08	6.73893e+07	1.87351e+08	2.20305e+09	7.00177e+07	1.27519e+08	2.02961e+07	1.70894e+07	2.58614e+07
TRUE		C20 H38 N6 O3	Full match	No results	No results	No results	3.24	410.302	443.335	11.05	0	0		DDA for other ion	[M+H+MeOH]+1	3.39201e+08	5.95493e+08	3.53538e+08	5.95922e+08	5.25757e+08	6.52573e+08	6.44923e+08	2.19437e+09	1.19999e+08	7.08154e+08	4.37886e+08	8.48837e+08	6.90007e+08	6.76932e+08	9.57435e+08	4.19915e+08	1.26496e+09	4.0224e+08	4.95203e+08	2.79337e+07	3.3657e+07	2.97421e+07	8.97135e+07	9.14485e+07	8.13204e+07	8.72008e+07	7.92702e+07	8.86158e+07	9.32355e+07	8.00247e+08	5.28322e+08	5.63887e+08	3.98095e+08	2.69354e+08
TRUE		C21 H42 N6 O4	Full match	No results	No results	No match	2.61	442.328	443.335	11.047	3	0		DDA for preferred ion	[M+H]+1	3.39201e+08	5.95493e+08	3.53538e+08	5.95922e+08	5.25757e+08	6.52573e+08	6.44923e+08	2.19437e+09	1.19999e+08	7.08154e+08	6.17594e+08	8.48837e+08	6.90007e+08	6.76932e+08	9.57435e+08	4.19915e+08	1.26496e+09	4.0224e+08	4.95203e+08	1.3999e+07	1.54568e+07	1.42846e+07	8.97135e+07	9.14485e+07	8.13204e+07	8.72008e+07	7.92702e+07	8.86158e+07	9.32355e+07	8.00247e+08	5.28322e+08	5.63887e+08	3.98095e+08	2.69354e+08
TRUE		C40 H79 N5 O7 P2	Full match	No results	No match	No match	-0.44	803.545	804.552	14.222	42	0		No MS2	[M+H]+1	3.34617e+06	1.32253e+09	8.09747e+08	2.16663e+09	8.54019e+08	1.80464e+06	6.10545e+08	8.64847e+08	1.13952e+09	1.17046e+09	2.93789e+07	7.35948e+08	1.00883e+09	7.06407e+08	6.88547e+08	2.88841e+06	9.89939e+08	5.95594e+08	9.12e+08	1.6665e+06	1.1727e+06	1.50281e+06	5.64483e+08	2.60718e+06	5.24197e+06	1.35573e+06	3.02397e+06	4.89797e+06	1.74143e+06	6.55336e+08	2.83847e+06	1.28073e+09	4.53438e+08	1.06571e+09
TRUE		C54 H106 N10 O15 P2 S	Full match	No results	No results	No results	-0.33	1228.7	615.359	8.867	0	0		DDA for other ion	[M+2H]+2	6.68388e+07	9.28525e+07	1.01895e+07	8.63307e+06	1.02939e+07	2.36281e+07	8.29624e+06	2.0944e+07	1.23969e+07	1.72527e+07	3.6277e+08	1.2127e+08	3.94172e+07	4.94196e+07	1.41571e+07	4.88278e+08	8.67295e+06	1.65277e+07	3.5264e+07	5.78048e+06	4.91543e+06	6.19414e+06	4.74426e+07	5.49372e+07	4.75892e+07	4.39085e+07	4.22215e+07	5.15727e+07	4.53912e+07	9.70665e+06	1.79981e+07	9.11888e+06	2.16721e+08	5.6957e+08
TRUE		C33 H50 N4 O5 S	Full match	No results	No results	No results	2.71	614.352	615.359	8.872	0	0		DDA for preferred ion	[M+H]+1	6.68388e+07	9.28525e+07	1.01895e+07	8.63307e+06	1.02939e+07	2.36281e+07	8.29624e+06	2.0944e+07	1.23969e+07	1.72527e+07	3.6277e+08	1.2127e+08	3.94172e+07	4.94196e+07	1.41571e+07	4.88278e+08	8.67295e+06	1.65277e+07	3.5264e+07	5.78048e+06	4.91543e+06	6.19414e+06	4.74426e+07	5.49372e+07	4.75892e+07	4.39085e+07	4.22215e+07	5.15727e+07	4.53912e+07	9.70665e+06	1.79981e+07	9.11888e+06	2.16721e+08	5.6957e+08
TRUE		C48 H86 N8 O16	Full match	No results	No results	No match	-0.2	1030.62	516.315	8.802	21	0		DDA for other ion	[M+2H]+2	5.75763e+07	5.51702e+07	2.1406e+07	2.11988e+07	2.01056e+07	2.94175e+07	2.37402e+07	2.67522e+07	2.31529e+07	2.66749e+07	2.27393e+08	1.12217e+08	4.82366e+07	9.03967e+07	3.36373e+07	1.98091e+08	2.30232e+07	4.04257e+07	4.36378e+07	2.41929e+07	1.9718e+07	2.41291e+07	7.22054e+07	4.36876e+07	4.48295e+07	4.20682e+07	5.64395e+07	4.76049e+07	3.75223e+07	2.52565e+07	2.79113e+07	2.31389e+07	1.08616e+08	4.25277e+08
TRUE		C42 H72 N9 P	Full match	No results	No results	No match	-1.34	733.564	734.571	12.054	39	0		No MS2	[M+H]+1	8.83445e+08	4.17363e+06	1.13707e+09	4.90111e+08	6.83562e+08	8.77619e+08	6.2671e+06	2.14564e+09	1.19258e+09	2.0129e+09	8.83141e+08	2.38033e+06	3.14066e+08	4.78297e+08	6.33701e+08	2.54603e+08	1.03974e+06	3.39471e+08	2.72292e+08	370477	358337	383872	5.42101e+08	5.10899e+08	1.19019e+09	2.03274e+08	3.16082e+08	5.30981e+08	1.78778e+07	1.82326e+08	4.43011e+08	2.96908e+06	2.16154e+08	3.77289e+08
TRUE		C44 H78 N O P3	Full match	No results	No results	No match	3.93	729.532	730.54	11.545	41	0		No MS2	[M+H]+1	1.58869e+06	1.62419e+06	2.15334e+07	4.30997e+06	1.6628e+06	1.50078e+06	1.38749e+06	1.69851e+06	1.8368e+06	1.85327e+06	5.2555e+06	1.85973e+06	8.20743e+06	6.0054e+06	7.44014e+06	1.99294e+06	1.61635e+06	7.05381e+06	2.62298e+06	1.01579e+06	954540	942234	2.06474e+06	1.29021e+06	1.38674e+06	1.25935e+06	3.21883e+06	1.37574e+06	1.34765e+06	4.38943e+06	1.88243e+06	6.5737e+07	2.07394e+06	1.74477e+07
TRUE	Spermine	C10 H26 N4	Full match	Full match	Full match	Full match	2.22	202.216	203.223	0.819	2	1	82.6	DDA for preferred ion	[M+H]+1	1.84663e+09	2.12243e+09	5.66127e+08	4.94524e+06	3.81093e+06	1.01044e+07	2.64732e+08	1.54923e+08	8.7554e+06	2.57644e+07	8.89545e+07	1.90594e+08	5.2822e+07	4.41957e+07	6.94209e+07	1.81051e+07	1.62337e+07	143611	1.86907e+07	48006.6	50882.2	44226.1	8.31626e+06	9.94168e+06	1.15637e+07	1.51357e+07	1.07416e+07	5.65356e+06	1.39588e+07	9.9559e+08	1.22579e+09	1.42634e+09	1.15999e+08	2.48613e+07
TRUE	2-Arachidonoyl glycerol	C23 H38 O4	Not the top hit	Full match	No results	Full match	-4.45	378.275	379.283	11.679	19	1	9.6	DDA for preferred ion	[M+H]+1	5.54574e+08	2.04202e+09	1.63916e+09	1.00752e+09	2.37426e+08	6.59886e+08	2.66286e+08	6.75814e+08	6.25232e+08	5.75335e+08	3.35032e+08	5.1534e+08	2.73033e+08	4.32656e+08	1.46649e+09	6.31526e+08	5.38964e+08	4.58523e+08	4.20193e+08	1.77983e+07	1.89143e+07	1.57659e+07	8.74524e+07	1.09243e+08	7.87457e+07	7.68788e+07	8.65063e+07	1.02057e+08	1.00008e+08	3.26502e+08	1.31013e+09	2.10402e+09	4.46762e+08	7.1276e+08
TRUE		C35 H67 N8 O3 P	Full match	No results	No results	No match	-2.21	678.506	679.513	8.818	1	0		DDA for preferred ion	[M+H]+1	1.49688e+09	1.00945e+09	1.20265e+09	1.42986e+09	1.18376e+09	1.5673e+09	1.6266e+09	1.3668e+09	1.15952e+09	1.35799e+09	1.29452e+09	1.53571e+09	1.51187e+09	1.50616e+09	1.08528e+09	7.99074e+08	1.50434e+09	1.46213e+09	1.41427e+09	137058	177959	113784	9.86688e+07	1.08608e+08	1.07796e+08	9.57836e+07	1.10141e+08	1.17728e+08	9.26525e+07	1.33436e+09	1.27166e+09	1.74222e+09	2.10249e+09	1.21924e+09
TRUE	4-Dodecylbenzenesulfonic acid	C18 H30 O3 S	Full match	Full match	No results	Full match	0.98	326.192	325.185	13.967	2	3	9.7	DDA for preferred ion	[M-H]-1	5.41336e+08	1.2263e+09	2.10993e+08	1.99452e+08	4.87402e+08	1.21988e+09	3.89956e+08	3.68283e+08	3.94856e+08	3.24232e+08	1.73963e+08	1.63369e+08	3.2311e+08	8.80823e+08	2.96579e+08	9.11857e+08	4.33572e+08	1.21117e+09	3.19893e+08	1.46932e+08	1.52894e+08	1.97437e+08	2.43235e+08	3.51974e+08	3.30175e+08	2.31839e+08	1.60739e+08	2.86988e+08	4.90207e+08	7.65705e+08	1.53226e+09	2.05768e+08	2.10076e+09	7.64897e+08
TRUE	(7R,18Z)-4-Hydroxy-N,N,N-trimethyl-7-[(9Z)-9-octadecenoyloxy]-10-oxo-3,5,9-trioxa-4-phosphaheptacos-18-en-1-aminium 4-oxide	C44 H85 N O8 P	No results	No results	No results	Full match	-3.08	786.599	787.606	13.384	4	0		No MS2	[M+H]+1	1.76091e+08	3.65694e+06	7.64758e+08	8.00455e+08	6.19282e+08	1.64608e+08	1.71248e+07	1.41539e+09	8.44834e+08	3.26007e+08	6.06613e+08	2.41552e+06	3.24455e+08	9.19719e+08	4.72358e+08	7.73904e+08	3.55201e+06	6.00522e+08	5.10518e+08	1.02658e+06	997283	990254	4.621e+08	4.30801e+08	1.03911e+09	1.3085e+08	5.13531e+08	5.94833e+08	2.08287e+09	3.8489e+08	5.08447e+08	1.23947e+07	1.40737e+09	6.55097e+08
TRUE	(7R,18Z)-4-Hydroxy-N,N,N-trimethyl-7-[(9Z)-9-octadecenoyloxy]-10-oxo-3,5,9-trioxa-4-phosphaheptacos-18-en-1-aminium 4-oxide	C44 H85 N O8 P	No results	No results	No results	Full match	-2.68	786.599	787.606	13.658	4	0		No MS2	[M+H]+1	1.02479e+08	5.2458e+06	1.12928e+08	1.64537e+08	6.19282e+08	4.91987e+08	2.41323e+06	1.41539e+09	8.44834e+08	1.56037e+08	6.06613e+08	847089	5.24079e+07	1.09578e+08	7.28879e+07	1.20057e+08	3.984e+06	1.06101e+08	9.28386e+07	525079	442979	467325	6.85049e+07	4.30801e+08	1.03911e+09	6.666e+07	1.40634e+08	1.31818e+08	2.08287e+09	5.60842e+07	2.78989e+08	1.17207e+06	2.22754e+08	9.45789e+07
TRUE		C44 H76 N4 O11	Full match	No results	No results	No results	0.15	836.551	859.54	10.864	0	0		DDA for other ion	[M+Na]+1	7.32018e+08	9.16731e+08	6.67919e+08	4.34555e+07	1.1969e+08	4.8053e+08	6.34057e+07	5.43e+08	9.30078e+08	1.57295e+08	1.23293e+09	2.07437e+09	1.53489e+09	1.57933e+08	3.33386e+08	1.53612e+09	7.67775e+07	1.01149e+09	5.72817e+08	548082	605853	528758	1.33992e+08	1.48288e+08	1.28428e+08	1.46179e+08	1.57186e+08	1.65422e+08	1.37171e+08	6.05634e+08	1.08819e+09	7.47454e+08	5.71658e+08	8.91541e+08
TRUE		C42 H70 N10 O9	Full match	No results	No results	No results	0.31	858.533	859.54	10.814	0	0		DDA for preferred ion	[M+H]+1	7.32018e+08	9.16731e+08	6.67919e+08	4.34555e+07	1.1969e+08	4.8053e+08	6.34057e+07	5.43e+08	3.33024e+07	1.57295e+08	1.23293e+09	2.07437e+09	1.53489e+09	1.57933e+08	3.33386e+08	1.53612e+09	7.67775e+07	1.01149e+09	5.72817e+08	533837	593030	525333	1.33992e+08	1.48288e+08	1.28428e+08	1.46179e+08	1.57186e+08	1.65422e+08	1.37171e+08	6.05634e+08	1.08819e+09	7.47454e+08	5.71658e+08	8.91541e+08
TRUE	Phytosphingosine	C18 H39 N O3	Full match	No results	No results	Full match	1.96	317.294	318.301	9.446	1	0		DDA for preferred ion	[M+H]+1	4.7821e+08	2.07239e+09	8.15151e+08	1.05289e+08	2.29294e+07	1.08395e+08	2.43371e+08	2.14328e+08	7.96899e+07	1.87632e+08	2.96654e+07	2.31256e+07	1.0381e+07	1.50551e+07	1.20548e+07	1.43778e+07	1.76244e+07	7.8958e+06	7.22316e+07	1.70545e+06	1.95945e+06	2.1514e+06	6.6226e+07	7.10779e+07	7.68903e+07	5.76695e+07	6.83202e+07	8.42735e+07	6.41352e+07	2.12777e+07	1.51569e+09	5.99077e+08	3.3626e+08	6.75548e+08
TRUE		C45 H80 N5 O4 P	Full match	No results	No results	No match	-0.16	785.595	786.602	12.98	69	0		No MS2	[M+H]+1	8.43245e+06	1.82529e+07	1.39828e+07	5.53076e+07	2.36021e+07	4.50831e+06	3.45781e+07	9.88292e+06	2.18406e+07	2.1906e+07	8.54735e+06	2.35382e+07	8.17717e+06	3.29083e+07	2.79782e+07	5.94831e+07	2.02292e+07	2.91545e+07	2.89789e+07	598537	643845	628928	2.20958e+07	1.59003e+07	1.62604e+07	1.91745e+07	2.124e+07	9.34247e+06	5.82743e+08	2.46547e+07	2.75142e+07	4.58732e+07	3.91281e+07	2.86709e+07
TRUE	ginsenoside Rg3	C42 H72 O13	Full match	No results	No results	Full match	-0.79	784.497	785.504	11.064	2	0		No MS2	[M+H]+1	1.47878e+08	9.26874e+07	8.09197e+07	4.69581e+06	2.5131e+07	3.43249e+07	1.26033e+07	5.24909e+07	1.08252e+08	2.58703e+07	5.32707e+08	2.56084e+08	6.70973e+08	2.21552e+07	9.99448e+07	1.06591e+09	1.37904e+07	1.00506e+08	1.84089e+08	541763	555133	565807	2.5867e+07	2.42737e+07	1.03664e+07	2.6792e+07	1.08955e+07	2.59897e+07	2.70989e+07	8.17753e+07	7.98269e+07	2.28261e+08	8.38881e+07	2.14284e+08
TRUE	testosterone ketolaurate	C31 H48 O4	Full match	No results	No results	Full match	-0.41	484.355	485.361	11.714	14	0		DDA for other ion	[M+H]+1	1.89023e+08	4.85154e+07	2.67912e+06	2.87397e+07	8.52409e+06	4.06599e+07	2.21023e+07	4.2432e+08	9.5172e+07	1.03277e+08	2.02654e+09	5.89491e+08	5.35406e+08	9.09046e+08	4.4716e+08	6.01938e+08	8.09617e+08	8.11449e+08	9.62245e+08	328701	351725	314013	7.06009e+07	5.96734e+07	5.03494e+07	5.74314e+07	5.46988e+07	6.25153e+07	5.71868e+07	5.75291e+07	2.71199e+08	3.12033e+08	2.18639e+08	1.05645e+08
TRUE	O-pentadecanoylcarnitine	C22 H43 N O4	Full match	No results	No results	Full match	1.78	385.32	386.327	9.64	1	0		No MS2	[M+H]+1	9.29989e+07	4.78489e+08	1.34065e+08	5.60861e+07	2.02163e+09	1.86455e+07	6.81297e+07	6.81837e+07	1.68757e+08	5.08123e+07	4.81547e+07	5.34099e+07	2.2268e+07	6.07878e+07	1.40744e+07	1.33059e+07	1.43779e+07	2.02746e+07	2.15769e+07	215177	234717	225095	1.52828e+07	8.29147e+06	9.42821e+06	6.38565e+06	9.06691e+06	1.98562e+07	2.22019e+07	5.61834e+07	2.26429e+08	1.16488e+08	1.41445e+08	2.69938e+08
TRUE		C4 H10 N O3 P	Full match	No results	No results	No results	2.06	151.04	184.074	1.098	0	0		DDA for preferred ion	[M+H+MeOH]+1	7.51312e+08	1.28093e+09	3.12416e+07	2.60222e+07	2.14176e+06	2.20931e+07	1.60704e+07	2.42166e+07	2.19168e+07	3.89176e+07	1.41572e+06	385688	2.35872e+06	1.32831e+06	968482	807918	282036	1.36873e+06	3.14287e+06	62404.2	73604.7	61807.1	5.47142e+06	4.22499e+06	6.86524e+06	5.33361e+06	5.67685e+06	6.95485e+06	2.90414e+06	1.55809e+07	6.18567e+07	3.37101e+07	3.36646e+07	2.99809e+07
TRUE		C24 H44 N4 O4	Full match	No results	No results	No results	1.84	452.337	453.344	8.525	0	0		DDA for preferred ion	[M+H]+1	1.81898e+09	1.75868e+09	1.76085e+09	1.49943e+09	1.84754e+09	1.82569e+09	2.00264e+09	1.42052e+09	1.85201e+09	1.56972e+09	1.55405e+09	1.85582e+09	1.93916e+09	1.82848e+09	1.28899e+09	1.52124e+09	1.71893e+09	1.48535e+09	1.83848e+09	274138	67013.5	62836.6	2.29292e+08	2.06878e+08	1.86839e+08	1.76772e+08	2.22019e+08	1.92865e+08	1.93491e+08	1.30817e+09	1.60171e+09	1.95794e+09	1.63175e+09	1.67335e+09
TRUE		C46 H80 N4 O12	Full match	No results	No results	No results	0.44	880.578	881.585	10.861	0	0		No MS2	[M+H]+1	1.1726e+08	1.7105e+08	9.36788e+07	3.26001e+06	1.13559e+07	6.4967e+07	4.8399e+06	1.00093e+08	1.7487e+08	1.61399e+07	3.2275e+08	1.20809e+09	5.49972e+08	1.62904e+07	5.63686e+07	9.38598e+08	6.89555e+06	2.18026e+08	1.11583e+08	368334	457655	405411	1.25766e+07	1.46631e+07	1.23692e+07	1.36099e+07	1.51408e+07	1.6599e+07	1.37325e+07	1.16832e+08	2.27774e+08	1.51484e+08	6.95398e+07	1.50977e+08
TRUE		C19 H42 N10 O	Full match	No results	No results	No results	1.04	426.355	427.362	10.018	0	0		No MS2	[M+H]+1	8.39911e+08	4.8355e+07	2.49485e+07	1.0591e+07	1.74055e+07	6.31682e+06	3.28282e+08	2.69857e+07	1.95082e+07	1.73518e+07	3.47882e+08	2.43833e+08	1.96846e+08	7.2245e+07	3.78773e+07	1.57654e+06	6.64067e+07	5.99015e+07	1.2017e+08	360695	363541	341548	4.25899e+07	4.0683e+07	4.27411e+07	4.57104e+07	4.10041e+07	4.29818e+07	5.50535e+07	4.8323e+08	3.41488e+07	8.77144e+08	5.60134e+07	7.22785e+07
TRUE		C43 H76 N5 O3 P	Full match	No results	No results	No match	0.48	741.569	742.576	11.711	10	0		No MS2	[M+H]+1	6.84032e+08	4.76607e+06	4.16697e+08	8.17136e+07	5.83586e+07	5.49495e+08	1.83643e+06	1.82665e+08	3.51899e+08	1.85852e+09	6.3548e+08	5.11213e+06	1.97931e+09	7.64227e+08	1.99465e+09	1.95527e+08	4.31667e+06	1.4183e+09	1.47517e+09	843730	902827	897071	2.0777e+08	1.31292e+07	3.01707e+07	3.84544e+08	1.08029e+08	1.09345e+08	8.25677e+07	7.78473e+08	4.80434e+08	2.09813e+06	1.21558e+08	1.97887e+08
TRUE	3-hydroxyhexadecanoylcarnitine	C23 H45 N O5	Full match	No results	No results	Full match	1.86	415.331	416.338	9.587	4	0		DDA for preferred ion	[M+H]+1	3.72247e+08	1.46215e+09	4.51081e+08	1.81288e+08	7.66928e+08	1.16609e+08	1.88402e+08	3.06836e+08	3.92031e+08	6.02311e+08	3.67819e+07	4.13046e+07	2.12271e+07	1.68295e+07	3.45106e+06	6.67559e+06	8.93481e+06	6.1155e+06	2.11135e+07	164909	148733	147165	3.0347e+07	3.15425e+07	2.99013e+07	4.72243e+07	3.32778e+07	2.89645e+07	3.50431e+07	6.26091e+07	5.94407e+08	6.70713e+08	7.72292e+08	1.07167e+09
TRUE	Gentian violet	C25 H29 N3	Full match	Full match	No results	No results	1.62	371.237	372.244	9.057	0	1	10	DDA for preferred ion	[M+H]+1	2.68745e+06	1.32824e+07	8.41239e+06	8.00525e+06	4.31275e+06	7.46015e+06	2.13839e+06	4.38938e+06	3.9342e+06	1.01767e+07	2.52391e+07	1.97436e+09	4.42717e+07	1.7673e+07	4.69091e+06	1.34227e+08	6.11334e+06	6.31796e+06	1.04369e+08	158893	161107	137716	8.13816e+06	8.3473e+06	8.22103e+06	8.2592e+06	1.04417e+07	8.7379e+06	8.38178e+06	6.37505e+06	4.38662e+06	5.16419e+06	2.14447e+07	1.92566e+07
TRUE		C14 H26 N6 O3	Full match	No results	No results	No results	2.75	326.208	327.215	8.972	0	0		No MS2	[M+H]+1	764690	1.16707e+06	452408	635730	429250	545899	3.07861e+08	587420	485357	568879	1.55582e+06	1.16408e+06	424113	901018	646846	4.13302e+06	1.96998e+09	492653	692689	540118	1.0917e+06	514831	7.84651e+06	8.44658e+06	8.16398e+06	679137	9.11752e+06	9.13727e+06	1.04892e+07	527790	679609	457315	1.59972e+06	3.69957e+06
TRUE	4-Undecylbenzenesulfonic acid	C17 H28 O3 S	Full match	No results	No results	Full match	0.79	312.176	311.169	13.63	1	0		DDA for preferred ion	[M-H]-1	9.14793e+07	1.56384e+08	5.8835e+07	6.82653e+07	7.579e+07	1.13557e+08	8.9389e+07	8.46664e+07	1.29107e+08	8.52286e+07	1.15138e+08	1.96542e+09	1.00819e+08	1.31717e+08	6.94422e+07	1.1815e+08	8.98023e+07	9.69309e+07	7.72405e+07	1.88491e+07	1.78511e+07	1.496e+07	2.07506e+07	2.7257e+07	2.88931e+07	2.85562e+07	2.73807e+07	3.7933e+07	4.38829e+07	3.26944e+08	2.23453e+08	5.98468e+07	1.38108e+08	9.15115e+07
TRUE		C47 H78 N5 O4 P	Full match	No results	No results	No match	0.33	807.579	808.587	14.699	55	0		No MS2	[M+H]+1	4.81589e+07	1.51828e+09	8.08436e+08	5.85152e+08	1.19014e+09	6.15468e+07	1.9644e+09	8.54663e+08	1.14151e+09	1.30025e+09	4.1304e+07	2.9328e+08	1.12871e+09	8.51595e+08	8.87982e+08	4.66597e+07	4.6412e+08	5.77299e+08	8.01084e+08	1.03875e+06	1.01582e+06	1.05949e+06	3.58191e+08	3.63607e+07	5.13877e+07	4.90762e+07	6.12223e+07	7.61405e+07	1.48944e+07	5.89726e+08	3.17408e+07	1.34574e+09	6.2667e+08	1.64355e+09
TRUE		C39 H79 N3 O5 P2	Full match	No results	No results	No match	-2.06	731.548	732.555	13.978	49	0		No MS2	[M+H]+1	3.41706e+06	9.94459e+08	1.56336e+09	1.51134e+09	1.32469e+09	4.34522e+06	1.14275e+09	1.05197e+09	5.23457e+08	1.50922e+09	4.59591e+06	6.07901e+08	6.44153e+08	6.16551e+08	5.40956e+08	2.17355e+06	6.83516e+08	3.84341e+08	4.39314e+08	1.36384e+06	971828	895513	5.57323e+08	3.101e+06	4.65261e+07	1.08468e+06	7.1474e+06	2.25856e+06	1.10216e+06	1.04346e+09	3.80029e+06	9.9538e+08	8.25146e+08	1.9529e+09
TRUE		C36 H75 N5 O7 P2	Full match	No results	No results	No match	-0.1	751.514	752.521	12.054	44	0		No MS2	[M+H]+1	6.83053e+06	6.4859e+08	7.69285e+08	5.52319e+08	2.95746e+08	8.41579e+06	2.2539e+08	4.38733e+08	3.218e+08	5.993e+08	7.42406e+06	4.69687e+08	2.70139e+08	3.51985e+08	1.45417e+08	7.72051e+06	5.15632e+07	3.97337e+08	1.9127e+08	7.00396e+06	7.29211e+06	7.36926e+06	9.85648e+07	8.27141e+06	9.05329e+06	8.83787e+06	7.77837e+06	8.78599e+06	6.46371e+06	2.88096e+08	6.49466e+06	4.0089e+08	3.30024e+08	4.44839e+08
TRUE	N-Oleoyl-L-Serine	C21 H39 N O4	Full match	No results	No results	Full match	1.75	369.289	370.296	9.362	4	0		DDA for preferred ion	[M+H]+1	2.45258e+08	5.61904e+07	2.2692e+08	5.40801e+07	1.92668e+09	4.81469e+07	1.64541e+08	2.12014e+07	1.67227e+08	4.83339e+07	3.59285e+07	8.49207e+07	2.2394e+07	2.94996e+07	5.13612e+06	1.35111e+07	1.61516e+07	5.52829e+06	3.75286e+07	178256	177581	173216	1.59721e+07	1.73132e+07	1.59408e+07	1.56127e+07	1.55076e+07	1.54356e+07	1.77288e+07	1.8314e+08	4.04124e+08	4.95977e+08	4.41612e+08	4.10136e+08
TRUE		C59 H115 N8 O18 P3	Full match	No results	No results	No results	0.33	1316.75	659.385	8.897	0	0		DDA for other ion	[M+2H]+2	7.25085e+07	1.17785e+08	5.52524e+06	8.74186e+06	9.4734e+06	2.15756e+07	6.75225e+06	1.9849e+07	9.59628e+06	2.11461e+07	4.02406e+08	1.2647e+08	1.39212e+07	5.77095e+07	1.27792e+07	6.61807e+08	1.6864e+07	1.74753e+07	3.49307e+07	4.17547e+06	2.90408e+06	3.80403e+06	5.03298e+07	6.22923e+07	4.87502e+07	4.02864e+07	4.3441e+07	5.77637e+07	4.71144e+07	4.74062e+06	1.60553e+07	8.1462e+06	2.55438e+08	7.17883e+08
TRUE		C30 H57 N8 O2 P3	Full match	No results	No match	No match	0	654.382	655.389	8.901	3	0		No MS2	[M+H]+1	2.34757e+07	1.17785e+08	1.8669e+07	2.86965e+07	1.77955e+07	2.15756e+07	2.33124e+07	1.9849e+07	2.42891e+07	2.11461e+07	4.0306e+08	1.8789e+07	2.50598e+07	5.77095e+07	2.19424e+07	6.50917e+08	2.21163e+07	1.96706e+07	1.60535e+07	4.00779e+06	2.90408e+06	3.80403e+06	5.03298e+07	6.22923e+07	4.87502e+07	4.02864e+07	4.3441e+07	5.77637e+07	4.71144e+07	2.61142e+07	1.91284e+07	2.14691e+07	2.55438e+08	7.17883e+08
TRUE	nalorphine	C19 H21 N O3	Full match	No results	No results	Full match	2.52	311.153	312.16	9.888	10	0		DDA for preferred ion	[M+H]+1	3.70405e+07	3.1361e+07	1.01775e+06	5.05556e+06	1.05821e+06	1.85082e+06	468227	1.37684e+08	4.26759e+06	5.11409e+07	5.74643e+08	5.27416e+08	6.43894e+07	5.13194e+08	4.26605e+07	1.02221e+08	4.36515e+07	8.60386e+07	9.6448e+08	310578	281840	217723	1.65056e+07	1.63863e+07	1.72974e+07	1.57169e+07	1.79317e+07	1.84728e+07	2.02568e+07	1.20765e+07	2.40408e+06	7.52668e+07	1.77673e+07	9.6117e+07
TRUE	8-[(4E)-6-Hydroxy-6-methyl-4-hepten-2-yl]-19-methoxy-5,9,17,17-tetramethyl-18-oxapentacyclo[10.5.2.0~1,13~.0~4,12~.0~5,9~]nonadec-2-en-16-yl hexopyranoside	C37 H60 O9	No results	No results	No results	Full match	-0.87	648.423	649.431	11.667	1	0		No MS2	[M+H]+1	8.27954e+06	4.44354e+06	1.13798e+07	4.40787e+06	8.24214e+06	1.86066e+07	2.92581e+06	2.34039e+07	2.09591e+07	3.81185e+06	3.47182e+06	8.33685e+07	4.00109e+07	2.64094e+07	1.07871e+07	2.10044e+07	2.97356e+07	4.79369e+06	5.30954e+06	650474	731104	624402	813625	867225	960862	921963	946501	817395	979888	4.83989e+06	4.4624e+06	6.444e+06	9.34372e+08	1.41354e+08
TRUE	C12-Carnitine	C19 H37 N O4	Full match	No results	No results	Full match	1.79	343.273	344.28	9.236	4	0		DDA for preferred ion	[M+H]+1	1.01343e+08	2.19697e+07	7.65597e+07	3.72355e+07	1.88351e+09	3.06042e+07	8.59191e+07	4.90219e+07	1.63638e+08	3.99938e+07	4.64478e+07	3.54517e+07	2.00545e+07	9.98878e+06	5.18027e+06	1.7677e+07	8.10155e+06	6.20271e+06	3.09026e+07	121593	104221	125601	1.33742e+07	1.22901e+07	1.15206e+07	1.45459e+07	1.31198e+07	1.284e+07	1.22799e+07	1.08692e+08	8.77493e+07	3.01822e+08	2.26206e+08	1.62646e+08
TRUE		C44 H61 O4 P	Full match	No results	No results	No results	-1.56	684.43	685.437	13.218	0	0		DDA for preferred ion	[M+H]+1	4.16815e+07	6.57231e+07	7.79941e+07	7.84689e+07	8.57307e+07	5.9934e+07	4.8073e+07	6.74264e+07	3.58535e+07	9.58426e+07	8.85374e+07	5.38507e+07	5.2886e+07	4.48933e+07	5.97802e+07	6.17541e+07	6.27806e+07	6.59048e+07	5.97618e+07	5.70352e+07	7.19443e+07	6.6035e+07	1.2151e+08	3.6594e+07	1.06673e+08	3.31623e+07	4.22732e+07	4.01764e+07	1.21371e+09	5.97146e+07	4.38307e+07	5.84579e+07	4.55154e+07	5.18431e+07
TRUE		C29 H58 N6 O8	Full match	No results	No results	No results	1.96	618.433	619.44	11.084	0	0		DDA for preferred ion	[M+H]+1	8.77468e+07	5.87612e+08	7.41055e+07	9.88771e+07	9.22459e+07	1.27126e+08	1.23356e+08	1.86481e+09	3.62977e+07	1.56762e+08	1.50284e+08	1.1789e+09	1.62916e+08	5.82456e+08	5.2623e+08	5.67926e+08	3.72844e+08	1.07448e+08	7.14435e+07	1.76233e+07	1.93486e+07	1.88695e+07	4.1486e+07	4.95878e+07	4.17492e+07	4.66225e+07	4.31942e+07	4.63879e+07	5.40167e+07	3.65177e+08	4.23487e+08	1.79046e+08	1.25308e+08	5.46353e+07
TRUE		C39 H77 N3 O5 P2	Full match	No results	No results	No match	-1.87	729.532	730.54	11.89	41	0		No MS2	[M+H]+1	1.23334e+06	9.31197e+07	1.18093e+09	8.85821e+07	7.46161e+07	989429	3.38478e+07	4.98576e+07	2.8746e+07	9.09707e+07	1.35628e+06	1.26101e+08	1.14903e+08	1.85345e+08	1.94947e+08	1.22511e+06	1.90555e+08	1.665e+08	7.67662e+07	829745	859516	816139	6.71951e+07	975783	3.09904e+06	1.04684e+06	1.02359e+06	985685	997914	1.22718e+08	1.2394e+06	5.73829e+08	8.04876e+07	2.76762e+08
TRUE		C65 H114 N7 O15 P3	Full match	No results	No results	No results	-0.22	1325.76	663.886	7.133	0	0		DDA for other ion	[M+2H]+2	4.42379e+08	9.72129e+08	1.68941e+08	3.09025e+07	1.21094e+08	8.70133e+07	4.77336e+07	3.34212e+08	1.40276e+08	4.44036e+08	1.06392e+07	4.74368e+06	1.17565e+06	3.70143e+07	1.11041e+07	1.345e+07	5.63589e+06	1.59882e+07	6.72745e+06	61068.2	76259.2	95434.9	5.27954e+06	6.44467e+06	7.30819e+06	4.26772e+06	6.99974e+06	6.99596e+06	4.5402e+06	1.3101e+07	1.8577e+09	9.49804e+06	4.38192e+08	7.76289e+08
TRUE	4-Dodecylbenzenesulfonic acid	C18 H30 O3 S	Full match	Full match	No results	Full match	1.19	326.192	325.185	14.274	2	3	9.7	DDA for preferred ion	[M-H]-1	5.39331e+08	1.01777e+09	1.75279e+08	3.75654e+07	3.991e+08	9.10535e+08	3.06536e+08	2.81618e+08	2.82482e+08	3.33675e+08	2.5774e+08	4.51782e+08	3.37266e+08	7.76785e+08	3.04492e+08	7.02702e+08	3.885e+08	1.06305e+09	1.41671e+08	1.92775e+08	1.99521e+08	1.61471e+08	1.98821e+08	2.5296e+08	2.29173e+08	3.30733e+08	2.37819e+08	2.73989e+08	6.30316e+08	7.29322e+08	1.42958e+09	1.52314e+08	1.84682e+09	3.97287e+08
TRUE		C24 H42 N5 O3 P	Full match	No results	No results	No match	-1.01	479.302	480.309	11.138	6	0		DDA for preferred ion	[M+H]+1	6.64507e+08	1.21262e+09	6.74588e+08	4.38336e+08	3.33255e+08	4.0521e+08	6.50378e+08	5.10956e+08	5.14906e+08	1.1503e+09	7.29909e+08	2.26358e+08	2.68857e+08	2.93506e+08	9.24869e+07	2.51286e+08	2.46603e+08	1.67665e+08	1.85638e+08	1.1489e+06	382060	376125	7.85802e+07	7.77669e+07	7.34e+07	8.45674e+07	8.10548e+07	8.56816e+07	9.23091e+07	3.24814e+08	1.32291e+09	1.00673e+09	1.03999e+09	1.12975e+09
TRUE		C36 H64 N7 O P3	Full match	No results	No results	No match	3.96	703.441	704.449	11.696	8	0		No MS2	[M+H]+1	2.54276e+07	5.35173e+06	6.2638e+06	2.84726e+06	6.35531e+06	8.08973e+06	2.13375e+06	1.25197e+07	1.11874e+07	3.23698e+06	5.48623e+07	5.29063e+07	2.46383e+07	1.18397e+07	7.52223e+06	1.04129e+07	1.15468e+07	4.67042e+06	3.37651e+06	545783	584011	521394	700004	661599	733034	703359	722079	619442	747550	2.07336e+07	1.55402e+07	4.69056e+06	6.28848e+08	1.32908e+08
TRUE	Elaidamide	C18 H35 N O	Full match	Full match	No results	Full match	2.13	281.272	282.28	9.475	4	5		DDA for other ion	[M+H]+1	4.08131e+08	1.24805e+09	8.30136e+08	3.09823e+08	8.03212e+07	2.64878e+08	1.46071e+08	2.51898e+08	1.78611e+08	6.4639e+08	1.31846e+08	2.06882e+08	6.06296e+07	1.25321e+08	6.6239e+06	8.16543e+07	9.92107e+07	1.48204e+08	1.42979e+08	7.48119e+06	1.12562e+07	6.528e+06	1.0169e+08	8.13504e+07	9.09562e+07	7.97157e+07	8.23689e+07	1.03015e+08	8.63701e+07	6.00606e+06	8.88553e+08	3.23146e+08	1.07508e+09	1.14697e+09
TRUE	(9E,12E)-9,12-Octadecadienal	C18 H32 O	Full match	No results	No results	Full match	2.28	264.246	282.28	9.476	15	0		No MS2	[M+NH4]+1	4.08131e+08	1.24805e+09	8.30136e+08	3.09823e+08	8.03212e+07	2.64878e+08	1.46071e+08	2.51898e+08	1.78611e+08	6.4639e+08	1.31846e+08	2.06882e+08	6.06296e+07	1.25321e+08	1.13134e+08	8.16543e+07	9.92107e+07	1.48204e+08	1.35395e+08	2.04832e+06	5.98726e+06	3.48881e+06	1.0169e+08	8.13504e+07	9.09562e+07	7.97157e+07	8.23689e+07	1.03015e+08	8.63701e+07	1.35055e+08	8.88553e+08	3.23146e+08	1.07508e+09	1.14697e+09
TRUE		C8 H6	Full match	No results	No results	No results	3.25	102.047	120.081	2.255	0	0		DDA for preferred ion	[M+NH4]+1	4.11125e+08	4.97247e+08	1.79949e+09	1.76809e+08	1.83578e+08	1.40355e+08	1.73808e+08	4.24158e+08	4.20107e+08	4.30412e+08	6.75143e+07	1.17135e+08	3.73639e+07	1.48461e+08	9.75469e+07	1.12399e+08	7.69949e+07	1.25758e+08	5.98425e+07	194412	228257	204509	2.27229e+07	5.01895e+07	4.06226e+07	2.28877e+07	4.96453e+07	2.34399e+07	2.80821e+07	1.69798e+08	8.94243e+08	6.14238e+07	8.05951e+08	6.37093e+08
TRUE		C8 H9 N	Full match	No results	No results	No results	2.85	119.074	120.081	2.266	0	0		DDA for preferred ion	[M+H]+1	5.99907e+08	7.41194e+08	1.79949e+09	2.56541e+08	2.58086e+08	1.93339e+08	2.7736e+08	7.21904e+08	6.85882e+08	6.85202e+08	9.80732e+07	1.69191e+08	5.49902e+07	2.1379e+08	1.40622e+08	1.59223e+08	1.14365e+08	1.86048e+08	8.80566e+07	828804	882407	861877	3.97545e+07	8.02008e+07	6.57877e+07	3.10569e+07	8.34225e+07	4.81249e+07	3.99691e+07	2.41497e+08	1.4401e+09	8.79342e+07	1.2672e+09	6.37093e+08
TRUE	Creatine	C4 H9 N3 O2	Full match	Full match	No results	Full match	2.75	131.07	132.077	1.021	2	1	92.1	DDA for preferred ion	[M+H]+1	1.02676e+09	1.10036e+09	8.64625e+08	8.23964e+08	7.42897e+08	1.24699e+09	6.18589e+08	1.37562e+09	7.14681e+08	1.15623e+09	6.25914e+08	4.57248e+08	5.37278e+08	3.2318e+08	4.97063e+08	2.3733e+08	5.79013e+08	5.64428e+08	4.6663e+08	55220.1	77428.8	29878.1	2.59562e+08	2.61944e+08	2.69617e+08	2.529e+08	4.79865e+08	2.74321e+08	2.71534e+08	2.30759e+08	1.07103e+09	1.79574e+09	7.56566e+08	8.05387e+08
TRUE	2-arachidonyl-sn-glycero-3-phosphoethanolamine	C25 H44 N O7 P	Full match	No results	No results	Full match	2.17	501.287	502.294	10.751	4	0		DDA for preferred ion	[M+H]+1	4.83142e+08	7.86137e+08	6.20876e+08	2.56886e+08	3.5223e+08	3.42058e+08	2.07632e+08	3.49678e+08	4.79699e+08	6.07151e+08	1.78596e+09	4.65404e+08	3.68817e+08	3.13262e+08	1.84034e+08	4.57994e+08	3.47707e+08	1.77751e+08	2.79207e+08	219133	225341	245650	5.66202e+07	6.35437e+07	5.32369e+07	5.62201e+07	4.71785e+07	7.1428e+07	6.40289e+07	2.95859e+08	7.89529e+08	9.09494e+08	6.5945e+08	1.05804e+09
TRUE		C46 H81 N3 O7	Full match	No results	No results	No match	1.75	787.609	788.616	13.278	54	0		DDA for preferred ion	[M+H]+1	9.07907e+08	3.09491e+08	6.89451e+06	1.39435e+08	2.43455e+08	5.85791e+06	1.10801e+08	5.91964e+06	9.66126e+08	7.13024e+08	9.25004e+06	2.64636e+08	9.51539e+06	4.44293e+07	1.45078e+08	7.55015e+06	6.90151e+08	5.37424e+06	4.09679e+08	2.72593e+06	2.66369e+06	2.6743e+06	5.10781e+06	4.26203e+08	1.4293e+08	1.25833e+09	2.20072e+08	2.04465e+08	1.14985e+08	2.75301e+08	6.58889e+06	5.71718e+08	6.63114e+06	4.2536e+08
TRUE		C44 H83 N7 O P2	Full match	No results	No results	No match	-2.89	787.611	788.618	13.226	54	0		DDA for preferred ion	[M+H]+1	3.41563e+08	2.14544e+08	2.86241e+06	3.62657e+07	1.74322e+08	2.43205e+06	6.33209e+07	3.21005e+06	7.69377e+08	7.14979e+08	3.84036e+06	1.8175e+07	3.95053e+06	4.44293e+07	2.48894e+08	3.13462e+06	4.79188e+08	4.56788e+06	2.15978e+08	1.05876e+06	1.0927e+06	1.1103e+06	2.12063e+06	2.89802e+08	9.57713e+07	1.25308e+09	1.85151e+08	1.69732e+08	9.14811e+07	2.46492e+08	4.76702e+06	2.26633e+08	2.75307e+06	2.08182e+08
TRUE		C45 H82 N5 O4 P	Full match	No results	No results	No match	-0.07	787.61	788.618	13.434	54	0		DDA for preferred ion	[M+H]+1	3.41563e+08	7.51602e+08	1.33474e+06	3.62733e+08	4.39519e+08	1.01327e+06	5.21136e+08	1.1536e+06	9.14388e+08	7.14979e+08	1.23647e+06	2.41216e+08	1.33407e+06	1.31916e+08	4.56423e+08	1.3179e+06	7.34985e+08	1.21113e+06	2.51157e+08	863575	838931	798279	1.02424e+06	1.52445e+09	5.56783e+08	6.90264e+08	1.06844e+08	1.5921e+08	4.39927e+06	1.47675e+08	1.16271e+06	7.14492e+08	1.42703e+06	2.05228e+08
TRUE		C17 H40 N10 O	Full match	No results	No results	No results	0.49	400.339	401.346	9.716	0	0		DDA for preferred ion	[M+H]+1	7.65312e+08	9.4197e+06	9.20607e+08	6.92283e+06	1.93302e+08	2.20656e+08	3.9341e+08	3.59963e+08	9.14317e+08	7.80735e+06	3.11326e+08	2.8269e+08	1.40555e+08	9.65947e+06	4.21157e+07	9.91911e+07	6.89144e+07	9.16879e+07	1.42489e+08	267380	233365	250038	5.40494e+07	5.44484e+07	5.42914e+07	5.85111e+07	5.79889e+07	6.20149e+07	7.03896e+07	3.59052e+08	1.0116e+09	1.01839e+09	1.84654e+07	1.76693e+09
TRUE		C57 H111 N8 O17 P3	Full match	No results	No results	No results	0.7	1272.73	637.372	8.882	0	0		DDA for other ion	[M+2H]+2	7.65294e+07	1.05848e+08	8.8244e+06	7.86472e+06	9.21365e+06	2.21669e+07	6.73327e+06	2.02555e+07	1.07784e+07	2.11714e+07	3.24464e+08	1.17151e+08	1.34412e+07	6.45471e+07	1.11717e+07	5.399e+08	8.89752e+06	1.82503e+07	3.12582e+07	5.32894e+06	4.07627e+06	5.08965e+06	4.98979e+07	5.4814e+07	5.24541e+07	4.92591e+07	4.73076e+07	5.19309e+07	4.64072e+07	7.44879e+06	1.92687e+07	1.0524e+07	2.1396e+08	7.45091e+08
TRUE	S-Propyl hexanethioate	C9 H18 O S	No results	No results	No results	Full match	1.89	174.108	175.115	8.968	1	0		No MS2	[M+H]+1	7.03423e+06	1.06192e+07	1.3338e+06	816930	815308	1.49724e+06	843187	1.14708e+06	859625	1.46424e+06	5.15449e+07	1.62685e+07	1.45161e+06	6.15438e+06	5.28019e+06	8.27809e+07	1.49339e+06	3.31327e+06	3.12534e+06	676047	335321	662978	3.98089e+06	4.23143e+06	3.59825e+06	3.99486e+06	4.93513e+06	3.96764e+06	5.57259e+06	1.07963e+06	5.08675e+06	1.1038e+06	1.86948e+07	1.12171e+08
TRUE	N-oleoylthreonine	C22 H41 N O4	Full match	No results	No results	Full match	1.54	383.304	384.311	9.543	2	0		DDA for other ion	[M+H]+1	5.39052e+06	1.05618e+07	8.8581e+06	1.41142e+07	1.74996e+09	5.07374e+06	4.04334e+06	2.71116e+06	1.82217e+07	4.09884e+06	2.65374e+06	3.3295e+07	910174	3.68393e+07	1.21078e+06	5.16779e+06	1.56829e+06	567291	3.97845e+06	188340	219793	179555	5.65819e+06	4.89295e+06	5.72681e+06	5.62702e+06	5.45783e+06	5.71736e+06	5.98855e+06	1.11762e+07	1.44682e+08	1.80398e+07	5.52525e+07	8.30493e+07
TRUE		C32 H69 N10 O5 P	Full match	No results	No results	No results	1.57	704.52	705.527	11.095	0	0		No MS2	[M+H]+1	2.00093e+06	6.98479e+07	1.68031e+08	4.26101e+07	9.3256e+07	1.8544e+06	4.65803e+07	4.23139e+07	8.24912e+06	7.10898e+07	2.92078e+06	4.68355e+07	2.95637e+07	2.06249e+07	4.4158e+07	3.64547e+06	1.12851e+08	4.47767e+07	1.77193e+07	1.23571e+06	1.29382e+06	1.27372e+06	2.0924e+07	1.57348e+06	1.55288e+06	1.64039e+06	1.5161e+06	1.67033e+06	1.66786e+06	1.20853e+08	3.13e+06	1.25812e+08	3.61564e+07	2.12085e+08
TRUE		C41 H73 N9 O3 P2	Full match	No results	No results	No match	-1.48	801.53	802.537	13.019	28	0		No MS2	[M+H]+1	8.55751e+06	7.98922e+08	2.79653e+08	4.19081e+08	6.26813e+08	5.49563e+06	3.50668e+07	2.04008e+08	1.48739e+08	3.44462e+08	8.20052e+06	7.05908e+08	4.02831e+07	7.99476e+08	1.05656e+09	4.92095e+06	2.75229e+07	9.06094e+07	4.41114e+07	400685	447407	412178	8.10558e+06	4.32927e+06	8.96041e+06	3.82149e+06	6.65195e+06	6.76929e+06	1.56969e+06	5.28371e+08	1.19391e+07	1.74517e+09	1.79267e+07	3.38566e+07
TRUE		C36 H75 N7 O4 S	Full match	No results	No results	No results	-4.46	701.557	702.564	10.772	0	0		No MS2	[M+H]+1	1.7076e+06	5.02323e+08	5.30905e+08	2.82759e+08	2.33795e+08	1.22033e+06	2.43134e+08	2.42571e+08	1.32763e+08	2.51838e+08	2.41853e+06	6.64503e+08	4.39297e+08	1.74254e+09	6.07709e+08	3.00554e+06	1.13014e+09	1.64336e+08	7.83198e+08	767114	695944	682202	1.02257e+08	1.05492e+06	1.12838e+06	1.17397e+06	863662	1.0607e+06	972626	6.64579e+08	1.68009e+06	3.83249e+07	2.56433e+07	1.42402e+08
TRUE		C40 H72 N5 O4 P	Full match	No results	No results	No match	0.67	717.533	718.54	12.396	47	0		No MS2	[M+H]+1	1.79556e+06	7.68358e+07	9.34493e+08	6.84009e+07	5.15108e+07	1.14065e+06	2.56863e+07	4.20981e+07	1.09846e+07	8.50216e+07	1.78894e+06	6.58358e+07	7.0221e+07	4.51258e+07	6.20645e+07	1.36967e+06	3.74851e+06	2.82452e+07	5.2728e+07	1.01433e+06	962088	961509	3.50013e+07	946475	1.05378e+06	1.06847e+06	1.07129e+06	1.11736e+06	1.07409e+06	3.36215e+07	1.49215e+06	9.47116e+07	1.89895e+07	2.19653e+08
TRUE	1-(9Z-octadecenoyl)-sn-glycero-3-phospho-(1′-sn-glycerol)	C24 H47 O9 P	Full match	No results	No results	Full match	1.37	510.296	509.289	10.263	3	0		DDA for preferred ion	[M-H]-1	172190	3.58283e+08	4.90992e+08	3.20827e+08	2.40893e+08	346280	1.72644e+08	1.20998e+08	2.65571e+08	3.3106e+08	172986	5.96667e+07	1.48247e+08	5.80172e+07	1.41279e+08	185112	1.09172e+08	2.30541e+08	8.4108e+07	148566	154297	159900	2.43327e+07	254502	803142	305248	313193	631009	184401	1.87369e+08	220707	6.30344e+08	3.96324e+08	5.4114e+08
TRUE		C38 H79 N3 O5 P2	Full match	No results	No results	No match	-1.6	719.548	720.556	13.908	37	0		No MS2	[M+H]+1	1.35507e+06	1.94542e+07	1.72138e+09	3.50897e+08	2.79773e+08	1.41191e+06	2.03692e+07	5.72549e+07	1.42294e+07	2.24997e+08	1.51169e+06	4.26175e+07	6.20836e+07	1.68286e+07	6.48622e+07	1.2658e+06	3.66877e+07	1.8195e+06	7.0078e+07	1.05932e+06	1.20209e+06	1.09062e+06	1.11322e+08	1.42974e+06	1.38567e+06	1.1718e+06	1.19692e+06	1.32485e+06	1.13392e+06	4.90538e+07	1.33612e+06	1.02889e+08	2.96515e+07	3.41724e+08
TRUE		C39 H81 N3 O5 P2	Full match	No results	No results	No match	-2.21	733.564	734.571	10.907	39	0		No MS2	[M+H]+1	9.29039e+07	1.14579e+07	5.54987e+07	1.03758e+09	8.76014e+07	8.74838e+07	7.61803e+06	2.82287e+07	4.74746e+07	4.642e+07	9.72943e+07	1.62992e+07	3.68419e+07	7.02924e+08	4.75144e+07	4.0417e+07	5.85779e+06	2.07763e+07	3.25919e+07	2.84573e+06	3.03577e+06	2.96374e+06	7.82762e+07	2.87625e+07	7.91842e+07	5.0264e+07	6.09852e+07	1.7672e+07	1.01099e+09	8.21041e+07	9.23204e+07	1.73983e+07	7.16578e+07	1.3861e+07
TRUE		C37 H66 O7 P2	Full match	No results	No results	No results	1.85	684.43	685.437	13.428	0	0		DDA for preferred ion	[M+H]+1	3.88823e+07	3.98349e+07	2.56262e+07	3.17273e+07	3.06929e+07	4.15775e+07	4.8073e+07	2.51177e+07	1.38972e+07	3.36891e+07	4.27214e+07	2.68257e+07	3.54286e+07	1.78505e+07	2.66142e+07	5.04129e+07	3.65585e+07	3.4821e+07	3.83599e+07	4.14173e+07	5.51235e+07	5.05546e+07	3.77361e+07	3.92933e+07	2.51612e+07	3.21408e+07	2.42602e+07	2.42236e+07	1.43763e+08	4.87075e+07	4.69392e+07	4.96393e+07	2.52872e+07	3.26252e+07
TRUE		C38 H77 N3 O5 P2	Full match	No results	No results	No match	-1.61	717.533	718.54	12.261	47	0		No MS2	[M+H]+1	2.51687e+06	1.01931e+07	5.91717e+08	4.88877e+07	1.07675e+07	2.57719e+06	4.20027e+06	5.51994e+07	2.87495e+06	4.94289e+07	2.96035e+06	8.12767e+07	7.86795e+07	5.04687e+07	6.20645e+07	2.49983e+06	3.74851e+06	6.21113e+07	2.62616e+06	1.03078e+06	918925	1.04555e+06	4.45318e+07	1.69895e+06	1.80651e+06	1.66754e+06	1.71652e+06	1.83825e+06	2.215e+06	4.22415e+07	3.00303e+06	2.10643e+08	2.6366e+07	2.19653e+08
TRUE	(2R)-2-Hydroxy-3-(phosphonooxy)propyl (9Z)-9-nonadecenoate	C22 H43 O7 P	Full match	No results	No results	Full match	0.66	450.275	509.289	10.326	1	0		DDA for other ion	[M-H+HAc]-1	141887	3.58283e+08	4.90992e+08	3.20827e+08	2.40893e+08	346280	1.72644e+08	1.20998e+08	2.65571e+08	3.3106e+08	166438	5.96667e+07	1.48247e+08	5.80172e+07	1.41279e+08	163450	1.08785e+08	2.28216e+08	8.4108e+07	122420	127143	131760	2.41742e+07	254502	803142	305248	289711	631009	169464	1.87369e+08	181866	6.30344e+08	3.96324e+08	5.4114e+08
TRUE	POPC	C42 H82 N O8 P	Full match	No results	No results	Full match	2.07	759.579	760.586	13.22	52	0		No MS2	[M+H]+1	6.21425e+08	8.74299e+06	5.76393e+08	8.16888e+08	8.77572e+08	7.29005e+08	3.55824e+07	1.47143e+09	1.51369e+09	1.48894e+09	3.43554e+08	9.28648e+06	5.86119e+08	6.75139e+08	1.69392e+09	4.36795e+08	3.34636e+07	5.70824e+08	6.29849e+08	885711	914099	928821	9.73953e+08	2.70346e+08	1.03864e+09	2.96569e+08	3.58328e+08	4.32922e+08	1.18688e+08	5.48575e+08	5.21355e+08	9.18055e+06	3.27247e+08	4.71892e+08
TRUE	[Similar to: N1-{5-[(4-chlorophenyl)thio]-4-fluoro-2-nitrophenyl}acetamide; ΔMass: 0.1990 Da]	C19 H32 O3 S	Full match	Invalid mass	No results	No results	0.77	340.207	339.2	9.671	0	1		DDA for preferred ion	[M-H]-1	4.87945e+07	7.51241e+08	1.63668e+08	1.01165e+09	2.41701e+08	5.48647e+07	5.8736e+08	8.59151e+08	8.39504e+08	2.42431e+08	5.18938e+07	5.82586e+08	1.69366e+09	1.17683e+09	6.70948e+08	7.55817e+07	8.57288e+08	1.03104e+09	5.79698e+08	6.99056e+07	6.46449e+07	6.21523e+07	2.23099e+08	8.56598e+07	5.78275e+07	6.64727e+07	5.91743e+07	8.50115e+07	7.12817e+07	5.94059e+08	4.0751e+07	1.61948e+09	3.98027e+08	7.6619e+08
TRUE		C53 H103 N8 O15 P3	Full match	No results	No results	No results	0.78	1184.68	593.346	8.851	0	0		DDA for other ion	[M+2H]+2	6.05697e+07	7.39516e+07	1.08601e+07	8.80279e+06	7.13268e+06	2.16229e+07	9.22693e+06	1.96102e+07	1.10859e+07	1.586e+07	2.68397e+08	1.25342e+08	2.45317e+07	5.5582e+07	1.49303e+07	3.19316e+08	1.22482e+07	2.19432e+07	2.91886e+07	8.16058e+06	6.30658e+06	7.66065e+06	4.17201e+07	4.84933e+07	4.7879e+07	3.79228e+07	4.15064e+07	4.74304e+07	3.51493e+07	1.30287e+07	1.82554e+07	1.44908e+07	1.52858e+08	5.00743e+08
TRUE	1-(1Z-hexadecenyl)-sn-glycero-3-phosphocholine	C24 H50 N O6 P	Full match	No results	No results	Full match	2.22	479.339	480.346	11.599	6	0		DDA for preferred ion	[M+H]+1	6.16554e+08	5.24475e+08	9.0197e+08	1.92329e+08	7.6691e+07	1.0462e+08	1.77834e+08	2.95247e+08	2.84905e+08	3.70958e+08	1.68046e+09	9.11062e+08	9.54594e+08	6.2383e+08	2.3222e+08	5.95823e+08	1.50546e+09	4.42881e+08	3.20181e+08	371245	363376	383445	5.30173e+07	4.51311e+07	4.74022e+07	5.05667e+07	5.51307e+07	5.24594e+07	6.71349e+07	2.13174e+08	6.76995e+08	3.73855e+08	6.53113e+08	4.23295e+08
TRUE		C38 H81 N5 O7 P2	Full match	No results	No results	No match	0.49	781.562	782.569	13.015	62	0		No MS2	[M+H]+1	1.04323e+09	3.6957e+07	1.275e+09	8.03301e+08	6.1403e+08	1.02227e+09	9.73511e+06	1.68015e+09	8.56898e+08	1.62242e+09	6.65946e+08	1.12842e+07	5.36384e+08	3.87987e+08	7.63928e+08	3.20022e+08	1.16153e+07	7.61553e+08	3.73612e+08	354632	395983	364803	2.55004e+08	2.86428e+08	8.04849e+08	2.87728e+08	3.02631e+08	4.35439e+08	4.33405e+07	3.56371e+08	8.17596e+08	6.36169e+07	6.36391e+08	6.83704e+08
TRUE		C41 H73 N3 O6	Full match	No results	No results	No results	-3.92	703.547	782.568	13	0	0		No MS2	[M+DMSO+H]+1	1.04323e+09	3.6957e+07	1.275e+09	8.03301e+08	6.1403e+08	1.02227e+09	6.64604e+07	1.68015e+09	8.56898e+08	1.62242e+09	6.65946e+08	6.73766e+07	5.36384e+08	3.87987e+08	7.63928e+08	3.20022e+08	2.13762e+08	7.61553e+08	3.73612e+08	473240	500146	497269	2.55004e+08	2.86428e+08	8.04849e+08	2.87728e+08	3.02631e+08	4.35439e+08	4.33405e+07	3.56371e+08	8.17596e+08	3.07122e+08	6.36391e+08	6.83704e+08
TRUE		C44 H74 N7 O13 P	Full match	No results	No results	No results	0.21	939.508	470.762	8.144	0	0		DDA for other ion	[M+2H]+2	3.16201e+07	7.35771e+06	3.03069e+07	6.48098e+06	1.55018e+07	9.92473e+07	4.17239e+07	3.38272e+07	3.94568e+07	1.06081e+07	7.75806e+08	1.42522e+08	1.83465e+07	2.32275e+08	1.70677e+08	3.66015e+08	3.12633e+08	2.19257e+08	1.4807e+08	34824	44363.1	31643.3	2.02643e+07	2.27831e+07	2.03856e+07	9.06091e+06	2.05078e+07	1.45999e+07	2.83881e+07	5.33273e+07	7.90396e+07	2.29043e+06	9.10797e+07	3.63103e+07
TRUE		C25 H55 N3 O4 P2	Full match	No results	No results	No match	-3.5	523.365	524.372	12.248	4	0		DDA for preferred ion	[M+H]+1	1.97944e+08	1.9049e+08	2.73782e+08	6.89595e+07	3.93174e+07	7.86433e+07	5.4029e+07	1.5698e+08	1.05724e+08	1.36805e+08	1.72677e+08	8.94498e+07	1.23888e+08	9.44574e+07	3.53686e+07	8.69455e+07	1.11164e+08	7.04718e+07	4.65609e+07	436747	400143	478547	9.63715e+06	1.12435e+07	8.56693e+06	1.62032e+07	1.54399e+07	1.15937e+07	1.05105e+07	1.62537e+08	5.239e+08	2.43892e+07	3.58523e+08	2.70804e+08
TRUE	1-heptadecanoyl-sn-glycero-3-phosphocholine	C25 H52 N O7 P	Full match	No results	No results	Full match	1.93	509.349	510.356	11.523	7	0		No MS2	[M+H]+1	5.17762e+07	1.65886e+09	3.00057e+08	8.67238e+07	8.25805e+07	1.85148e+07	4.80658e+07	5.84194e+07	1.46339e+08	6.18366e+07	3.15275e+07	4.0837e+07	8.71769e+06	2.3689e+07	8.25491e+06	1.29112e+07	1.21471e+07	1.29271e+07	9.05774e+06	591170	555522	548360	1.37938e+07	1.60331e+07	1.39936e+07	1.16915e+07	1.62656e+07	1.72403e+07	1.70209e+07	1.23281e+08	1.79205e+08	9.95055e+07	2.91944e+08	3.40221e+08
TRUE	2-Aminoethyl (2R)-2-hydroxy-3-[(1Z,12Z)-1,12-nonadecadien-1-yloxy]propyl hydrogen phosphate	C24 H48 N O6 P	Full match	No results	No results	Full match	2.36	477.323	510.357	11.504	1	0		No MS2	[M+H+MeOH]+1	7.48497e+07	1.65886e+09	3.00057e+08	8.67238e+07	8.25805e+07	1.90418e+07	4.80658e+07	6.12561e+07	1.46339e+08	6.18366e+07	3.15275e+07	4.0837e+07	8.71769e+06	2.3689e+07	8.25491e+06	7.315e+06	1.21471e+07	1.29271e+07	1.18448e+07	562588	528663	521847	1.37938e+07	1.60331e+07	1.39936e+07	1.16915e+07	1.62656e+07	1.72403e+07	1.70209e+07	1.32646e+08	1.79205e+08	9.95055e+07	2.91944e+08	3.40221e+08
TRUE		C22 H47 N4 O3 P	Full match	No results	No match	No match	4.2	446.34	510.356	11.538	35	0		No MS2	[M+ACN+Na]+1	3.35167e+07	1.65886e+09	3.00057e+08	8.67238e+07	8.25805e+07	1.24144e+07	2.21902e+07	5.84194e+07	1.46339e+08	6.18366e+07	3.15275e+07	4.0837e+07	3.19891e+07	2.3689e+07	8.25491e+06	1.29112e+07	1.21471e+07	1.29271e+07	9.05774e+06	481209	452191	446361	8.43339e+06	1.60331e+07	1.39936e+07	1.16915e+07	1.62656e+07	1.72403e+07	1.70209e+07	1.23281e+08	1.79205e+08	9.95055e+07	2.91944e+08	3.40221e+08
TRUE		C22 H50 N2 O4 P2	Full match	No results	No results	No match	-3.8	468.323	510.357	11.577	9	0		No MS2	[M+ACN+H]+1	3.35167e+07	1.65886e+09	3.00057e+08	5.07342e+07	8.25805e+07	1.24144e+07	2.21902e+07	5.84194e+07	9.40039e+07	6.18366e+07	3.15275e+07	4.0837e+07	3.19891e+07	2.3689e+07	8.25491e+06	1.29112e+07	1.60123e+07	1.29271e+07	9.05774e+06	402709	426690	436301	8.43339e+06	5.8562e+06	7.32177e+06	1.16915e+07	1.62656e+07	1.72403e+07	1.70209e+07	1.23281e+08	1.79205e+08	9.95055e+07	2.91944e+08	3.4471e+08
TRUE		C37 H75 N9 O3 P2	Full match	No results	No results	No match	1.05	755.548	756.555	12.996	48	0		No MS2	[M+H]+1	1.78345e+07	2.54235e+08	1.96801e+08	1.55908e+08	8.74739e+07	1.13605e+07	5.47625e+07	1.88167e+08	4.49128e+08	2.11934e+08	1.15681e+07	1.23128e+09	7.6297e+08	1.1353e+09	1.64967e+09	9.74372e+06	1.09864e+08	8.73001e+08	2.26528e+08	661732	711825	695333	7.22329e+07	5.88452e+06	2.77816e+07	4.16365e+06	8.02742e+06	5.7448e+06	3.08286e+06	4.76729e+08	2.02833e+07	4.76708e+08	1.719e+08	2.29768e+08
TRUE	O-heptadecanoylcarnitine	C24 H47 N O4	Full match	No results	No results	Full match	2.33	413.351	414.359	9.876	1	0		DDA for preferred ion	[M+H]+1	2.69963e+08	1.31479e+09	1.52198e+08	1.92176e+08	1.64358e+09	5.98906e+07	1.00739e+08	1.36697e+08	3.12446e+08	1.39798e+08	6.31262e+07	6.75866e+07	2.48477e+07	5.42891e+07	1.78587e+07	1.53309e+07	2.03006e+07	3.43159e+07	2.45168e+07	238216	274537	267808	2.30423e+07	1.47562e+07	1.61126e+07	2.45343e+07	2.36826e+07	2.67717e+07	2.87403e+07	8.80606e+07	3.87835e+08	1.89154e+08	3.97875e+08	3.47332e+08
TRUE		C39 H75 N9 O3 P2	Full match	No results	No results	No match	1.48	779.548	780.555	12.278	57	0		No MS2	[M+H]+1	8.58941e+06	5.02375e+08	3.78782e+08	5.40863e+08	1.24032e+08	6.7258e+06	3.49263e+08	3.27772e+08	2.61472e+08	6.38605e+08	1.5123e+07	2.35444e+08	4.78441e+08	3.89422e+08	3.5476e+08	7.58644e+06	2.79034e+08	3.37397e+08	1.98839e+08	547699	464524	555115	7.63711e+07	3.29774e+06	9.61203e+06	7.15461e+06	6.88642e+06	9.40578e+06	1.30459e+07	1.6992e+08	1.65563e+07	6.48567e+08	1.82994e+08	6.91154e+08
TRUE		C14 H29 N4 O3 P	Full match	No results	No match	No results	-1.89	332.197	333.204	9.889	0	0		No MS2	[M+H]+1	3.40792e+07	1.02365e+07	1.90275e+07	1.76469e+07	1.63578e+07	5.05265e+07	6.02276e+07	1.50378e+07	2.27578e+07	2.17711e+07	3.67654e+07	8.69466e+07	1.14467e+08	1.95693e+07	1.31699e+07	1.81634e+07	2.90442e+07	1.89602e+07	4.03719e+07	8.37118e+06	8.94621e+06	8.48469e+06	1.03443e+07	1.63461e+07	9.41667e+06	9.04269e+06	9.93047e+06	2.32584e+06	4.27158e+06	4.60829e+07	1.22502e+07	2.24207e+07	4.36637e+08	1.42062e+08
TRUE		C12 H22 N2 O5	Full match	No results	No results	No results	1.61	274.153	273.146	6.595	0	0		DDA for preferred ion	[M-H]-1	42876.5	1.1813e+06	37486.4	2.29195e+07	1.58496e+09	320610	1.06019e+06	174218	6.75649e+07	2.4845e+06	18843.9	7.72161e+06	14932.7	1.28e+07	3.03989e+06	2.74277e+06	3.13742e+06	1.19339e+06	4.16129e+06	14663	14742.6	14165.2	1.74478e+07	1.72346e+07	1.7327e+07	1.3693e+07	1.74993e+07	1.97666e+07	1.05805e+07	3.13587e+06	1.8097e+08	1.73634e+06	5.8463e+06	8.46307e+06
TRUE		C12 H12 Cl N	Full match	No results	No results	No results	2.68	205.066	238.1	7.126	0	0		No MS2	[M+H+MeOH]+1	1.51232e+06	2.05156e+06	1.58392e+09	794298	760373	549505	233794	902738	641328	807533	696808	189977	2.24928e+08	293616	318702	340956	243435	187834	178035	42017	43920.6	65662.5	1.48376e+06	3.72626e+06	1.49539e+06	1.48471e+06	1.24059e+06	2.62025e+06	1.36911e+06	274645	1.33639e+06	167561	1.77364e+06	3.79763e+06
TRUE	Ketamine	C13 H16 Cl N O	Full match	No results	No results	Full match	2.5	237.093	238.1	7.124	2	0		No MS2	[M+H]+1	5.03445e+06	4.43765e+06	1.58392e+09	988834	805117	1.09789e+06	435423	2.37765e+06	1.50592e+06	3.20747e+06	696808	416480	2.24928e+08	744700	397741	737510	526567	406820	421799	110214	113494	142032	2.17329e+06	3.72626e+06	2.52421e+06	1.48471e+06	2.30373e+06	2.62025e+06	1.36911e+06	594076	8.77783e+06	2.75229e+06	7.22071e+06	8.67443e+06
TRUE	Cholestenone	C27 H44 O	Full match	No results	Not the top hit	Full match	1.98	384.34	385.347	12.969	43	0		DDA for other ion	[M+H]+1	863952	1.36763e+06	682375	833910	1.643e+06	768310	7.26727e+06	1.15211e+06	3.31522e+07	9.16327e+06	2.36628e+06	3.24367e+06	3.26479e+07	7.92272e+06	1.06207e+08	787513	2.39308e+07	8.29282e+07	4.78098e+07	422604	454594	444062	1.26852e+06	617248	669243	659755	639526	522709	561548	5.02495e+07	1.05126e+06	5.12436e+07	5.22737e+06	1.46487e+07
TRUE	1,2,3,4-tetrahydro-β-carboline-3-carboxylic acid	C12 H12 N2 O2	Full match	No results	No results	Full match	2.55	216.09	217.098	5.466	1	0		DDA for preferred ion	[M+H]+1	4.8893e+07	5.28163e+07	1.72324e+07	591930	1.1548e+06	541012	3.62034e+08	3.20812e+06	575291	739738	2.08334e+08	2.23455e+08	1.09965e+08	2.81783e+06	1.30777e+06	1.42459e+06	1.33219e+07	489648	1.54159e+06	428852	459176	417260	8.05719e+06	7.88957e+06	7.63712e+06	9.82836e+06	7.98191e+06	8.31573e+06	7.77516e+06	4.42149e+07	9.13137e+06	4.36924e+08	7.77132e+06	9.2005e+06
TRUE		C43 H81 N3 O5 P2	Full match	No results	No results	No match	-1.99	781.564	782.571	13.15	62	0		No MS2	[M+H]+1	8.51223e+07	8.50007e+08	3.50812e+08	4.30184e+08	3.84595e+08	9.65639e+07	9.46645e+06	1.0386e+08	1.17033e+08	1.77209e+08	7.66199e+07	4.79729e+08	4.79264e+08	5.29515e+08	6.59854e+08	5.05824e+07	4.18265e+08	4.25784e+08	1.06251e+08	553489	544147	580429	2.09443e+08	8.05518e+07	2.16949e+08	7.76571e+07	8.80429e+07	4.35439e+08	4.33405e+07	3.58995e+08	6.10668e+07	8.2016e+08	3.69894e+08	7.85601e+08
TRUE		C45 H78 N5 O4 P	Full match	No results	No results	No match	0.06	783.579	784.586	14.663	48	0		No MS2	[M+H]+1	8.76821e+06	3.36596e+06	3.4336e+07	2.26231e+07	2.23037e+07	2.74944e+07	859697	4.01885e+06	2.40443e+06	827024	1.21926e+07	7.29942e+06	5.28518e+06	6.28016e+06	3.4926e+06	1.23021e+07	5.41787e+06	4.85568e+06	4.17374e+06	738972	722663	715392	8.32112e+06	4.76909e+06	1.64474e+07	4.04989e+06	1.51617e+07	5.03175e+06	2.46961e+07	1.31834e+07	2.85703e+07	9.72287e+06	1.27425e+07	3.70148e+07
TRUE		C9 H8	Full match	No results	No results	No results	2.29	116.063	149.096	9.611	0	0		No MS2	[M+H+MeOH]+1	1.21843e+09	1.17513e+09	1.03093e+09	1.15698e+09	1.06077e+09	9.03639e+08	1.27251e+09	1.22026e+09	9.21749e+08	9.48006e+08	8.97048e+08	9.4467e+08	9.38774e+08	1.05275e+09	9.85742e+08	1.17564e+09	1.04213e+09	9.77105e+08	1.06473e+09	2.78682e+06	2.54851e+06	2.12788e+06	8.80512e+08	5.8912e+08	7.9591e+08	9.86605e+08	7.53453e+08	8.59874e+08	7.05669e+08	8.71395e+08	1.09585e+09	1.0628e+09	1.02282e+09	1.56455e+09
TRUE		C45 H82 N5 O4 P	Full match	No results	No results	No match	0.11	787.611	788.618	12.99	54	0		DDA for preferred ion	[M+H]+1	5.53574e+06	1.01702e+08	2.84021e+06	6.18794e+07	1.01818e+08	1.39142e+06	2.76223e+07	3.21005e+06	4.60086e+08	1.59872e+08	4.18599e+06	9.97423e+07	3.02266e+06	1.14253e+08	1.45078e+08	3.26922e+06	4.8176e+08	4.56788e+06	2.77324e+08	765342	823278	804203	980746	1.45465e+08	5.18977e+07	6.88185e+08	7.10356e+06	1.11993e+08	2.20393e+08	3.3844e+08	5.20123e+06	2.9705e+08	2.25377e+06	2.96252e+07
TRUE	NP-001346	C11 H15 N5 O3 S	Full match	Full match	Full match	Full match	2.19	297.09	298.098	5.942	2	2	10	DDA for preferred ion	[M+H]+1	3.39584e+08	7.96172e+08	3.78412e+08	2.74095e+08	3.09048e+07	9.49788e+07	5.97804e+07	2.82752e+07	5.58576e+07	2.39462e+08	1.12476e+07	1.87753e+07	2.706e+06	2.00621e+06	400329	541649	538365	421703	1.76889e+06	152777	124566	118969	4.40376e+06	8.93225e+06	8.96137e+06	9.23178e+06	6.064e+06	9.11215e+06	9.18367e+06	4.50255e+07	3.70198e+07	3.12301e+08	1.02915e+08	1.85539e+08
TRUE	(7R)-4-Hydroxy-N,N,N-trimethyl-10-oxo-7-(palmitoyloxy)-3,5,9-trioxa-4-phosphapentacosan-1-aminium 4-oxide	C40 H81 N O8 P	No results	No results	No results	Full match	0.02	734.57	757.559	12.566	1	0		No MS2	[M+Na]+1	9.94533e+06	4.52153e+08	1.69143e+08	1.92549e+08	1.27383e+08	9.48851e+06	1.35578e+08	1.12518e+08	8.18351e+07	8.2231e+07	8.26111e+06	3.4191e+08	1.5619e+08	2.17803e+08	1.50847e+08	2.57782e+06	3.92914e+08	1.28573e+08	6.79596e+07	922176	899613	775472	6.39246e+07	8.21215e+06	2.44406e+06	2.0112e+06	7.96332e+06	4.92296e+06	945308	8.97085e+07	7.13212e+06	4.06582e+08	3.37721e+08	1.65464e+08
TRUE		C39 H73 N7 O P2	Full match	No results	No results	No match	-3.69	717.533	718.54	12.536	47	0		No MS2	[M+H]+1	1.6784e+06	1.01947e+08	6.5027e+08	6.60417e+07	7.35299e+07	1.50895e+06	3.71596e+07	7.51013e+07	9.10128e+06	8.98473e+07	1.9459e+06	7.06552e+07	8.3514e+07	5.28702e+07	2.32771e+07	1.87392e+06	7.78299e+07	2.52014e+07	5.2728e+07	1.20279e+06	1.17336e+06	1.17603e+06	4.19628e+07	1.18084e+06	1.33973e+06	1.3558e+06	1.20543e+06	1.21164e+06	1.23296e+06	4.96545e+07	1.92109e+06	1.25878e+08	1.07659e+07	1.27023e+08
TRUE	3-[(9Z)-9-Hexadecen-1-yloxy]-2-oxopropyl dihydrogen phosphate	C19 H37 O6 P	Full match	No results	No results	Full match	1.1	392.233	391.226	11.126	3	0		DDA for preferred ion	[M-H]-1	200278	1.70376e+07	1.52654e+09	5.31332e+08	9.5424e+06	204030	1.27842e+06	1.86459e+07	1.00113e+07	1.19201e+08	163659	2.07035e+07	1.76979e+07	1.45505e+07	6.5149e+06	144094	6.96907e+06	1.08136e+07	5.28724e+06	115333	100063	97374.6	1.20269e+07	277082	195555	113533	151587	108511	124272	6.92351e+06	384737	4.88248e+07	3.13653e+07	1.33359e+07
TRUE		C45 H84 N5 O5 P	Full match	No results	No results	No match	-0.1	805.621	788.618	13.574	3	0		DDA for other ion	[M+H-H2O]+1	3.42469e+08	1.03684e+09	2.10944e+06	8.71462e+07	2.4143e+08	2.28143e+06	9.06791e+08	2.28392e+06	1.31519e+09	7.14264e+08	2.5926e+06	8.52343e+08	2.79658e+06	6.14945e+07	1.78405e+08	3.37483e+06	7.34985e+08	2.62429e+06	1.34337e+08	1.78325e+06	1.75425e+06	1.65727e+06	2.01904e+06	1.52445e+09	5.56783e+08	2.97598e+08	1.13941e+08	2.78768e+08	1.9142e+06	1.47675e+08	3.24906e+06	7.14492e+08	2.95785e+06	1.40088e+08
TRUE		C40 H86 N3 O2 P3 S	Full match	No results	No results	No match	1.66	765.567	766.574	12.281	18	0		No MS2	[M+H]+1	2.50251e+08	2.11379e+07	1.16524e+09	2.38933e+07	1.15464e+09	3.73508e+08	9.84808e+06	1.52091e+09	9.18867e+08	1.59837e+07	6.26624e+08	1.03444e+07	6.44142e+08	1.23466e+09	5.34738e+08	8.23573e+07	5.41819e+06	6.10944e+08	3.66131e+08	1.01178e+06	959668	961838	2.62045e+08	4.02036e+08	9.16049e+08	4.14862e+08	3.47049e+08	5.90663e+08	9.92447e+07	5.90298e+08	3.85562e+08	1.0531e+07	4.81192e+08	4.25797e+08
TRUE		C34 H59 N5 O6	Full match	No results	No results	No results	0.19	633.447	634.454	10.838	0	0		DDA for preferred ion	[M+H]+1	7.80383e+08	3.79304e+08	5.89878e+08	6.47915e+07	1.85985e+08	4.75497e+08	7.62915e+07	2.7613e+08	2.8748e+08	1.95046e+08	9.99499e+08	6.81336e+08	1.16468e+09	1.96977e+08	7.01118e+08	1.47903e+09	1.38724e+08	3.6248e+08	8.43591e+08	1.99971e+06	1.32909e+06	1.52207e+06	1.76779e+08	1.74356e+08	1.84136e+08	1.68019e+08	1.74447e+08	1.96302e+08	1.82269e+08	6.95036e+08	3.1013e+08	2.95631e+07	6.52071e+08	8.3525e+08
TRUE		C37 H62 N2 O8	Full match	No results	No results	No results	-4.6	662.448	663.455	13.509	0	0		DDA for preferred ion	[M+H]+1	6.36051e+07	6.55179e+07	1.10164e+07	3.7116e+07	3.21396e+07	5.3237e+07	6.82832e+07	3.12814e+07	7.99315e+06	1.62647e+07	1.31222e+08	9.62514e+07	8.94686e+07	1.16464e+07	1.0221e+08	5.70057e+08	1.48247e+08	2.56091e+08	2.79074e+08	4.53957e+07	9.33001e+07	1.50028e+08	1.04803e+08	3.87058e+07	3.25871e+07	2.64702e+08	1.72429e+08	7.68572e+07	2.59954e+08	1.53571e+08	5.20035e+08	1.70875e+08	3.28029e+08	1.5584e+07
TRUE		C46 H81 N8 O4 P3	Full match	No results	No results	No results	0.41	902.56	903.567	10.856	0	0		DDA for other ion	[M+H]+1	3.64331e+08	6.526e+08	3.28107e+08	1.91102e+07	6.46235e+07	2.44007e+08	3.70486e+07	3.72424e+08	6.52218e+08	8.13395e+07	6.37738e+08	1.51765e+09	8.01926e+08	8.91261e+07	1.76635e+08	8.06091e+08	4.20765e+07	6.90517e+08	3.04075e+08	421430	523627	463853	7.02549e+07	7.44492e+07	6.94333e+07	7.89042e+07	8.53448e+07	8.45057e+07	7.10039e+07	3.20027e+08	8.09189e+08	3.67097e+08	2.72785e+08	4.64994e+08
TRUE		C37 H62 N2 O8	Full match	No results	No results	No results	-4.37	662.448	663.455	13.206	0	0		DDA for preferred ion	[M+H]+1	5.43453e+07	5.18671e+07	3.04558e+07	3.95596e+07	5.00375e+07	5.19232e+07	5.22015e+07	5.11277e+07	2.94887e+07	3.73006e+07	6.0696e+07	4.3218e+07	4.40315e+07	3.69133e+07	5.06929e+07	6.05524e+07	4.97409e+07	6.73126e+07	4.79443e+07	4.63151e+07	6.14209e+07	4.9532e+07	6.18883e+07	5.37825e+07	3.35457e+07	4.35734e+07	3.61986e+07	3.41898e+07	9.44772e+08	5.807e+07	6.058e+07	6.13388e+07	3.54007e+07	3.59031e+07
TRUE		C19 H34 O4 S	Full match	No results	No results	No results	0.29	358.218	339.2	9.816	0	0		DDA for other ion	[M-H-H2O]-1	4.87945e+07	1.94225e+08	1.63668e+08	1.96675e+08	2.41701e+08	5.48647e+07	2.19697e+08	2.18599e+08	1.76811e+08	1.6179e+08	5.18938e+07	2.49256e+08	9.84291e+08	2.89246e+08	2.88344e+08	7.55817e+07	2.56377e+08	3.14772e+08	1.8076e+08	6.99056e+07	6.46449e+07	6.21523e+07	2.23099e+08	1.74589e+07	1.56363e+07	6.64727e+07	5.91743e+07	8.50115e+07	7.12817e+07	5.94059e+08	4.0751e+07	4.41514e+08	3.98027e+08	1.47893e+08
TRUE	Dibutyl sebacate	C18 H34 O4	Full match	Full match	No results	Full match	2.32	314.246	337.236	11.265	44	1	98.4	DDA for preferred ion	[M+Na]+1	9.28495e+07	1.70026e+08	7.29727e+07	7.29965e+07	1.9626e+08	7.67458e+08	3.09251e+08	5.36513e+08	6.40022e+08	3.4253e+08	2.80579e+08	1.07084e+09	4.67192e+08	1.64392e+08	1.18178e+09	1.00742e+08	3.46445e+08	2.69481e+08	6.92669e+08	6.67253e+06	6.18457e+06	4.47739e+07	9.86878e+08	1.02663e+09	8.75168e+08	1.05297e+09	9.64208e+08	1.94504e+08	1.97147e+08	2.67049e+08	4.84639e+08	8.78841e+08	1.69279e+08	3.12878e+08
TRUE		C47 H78 N10 O18	Full match	No results	No results	No results	-0.13	1070.55	536.282	8.345	0	0		DDA for other ion	[M+2H]+2	1.34825e+07	1.68787e+06	9.68732e+06	7.73851e+06	8.56533e+06	9.87727e+07	2.52509e+07	1.36202e+07	2.34272e+07	1.68103e+07	3.31734e+07	1.94683e+08	2.61723e+07	2.7723e+08	1.24947e+08	5.76585e+08	2.45372e+08	2.11872e+08	2.9515e+08	59130.1	50425.9	50676.2	2.19071e+07	2.7353e+07	2.20151e+07	2.01217e+07	2.72388e+07	2.25625e+07	2.40731e+07	1.69514e+07	5.97692e+07	7.6221e+06	5.40459e+07	1.32178e+07
TRUE		C39 H75 N9 O2 P2	Full match	No results	No results	No match	-1.51	763.551	764.558	11.739	6	0		No MS2	[M+H]+1	4.61155e+08	1.29789e+06	1.92572e+07	2.66723e+07	4.74748e+07	1.89342e+08	768363	1.25105e+08	1.19063e+08	7.57905e+07	8.64571e+07	1.55507e+06	1.48715e+09	3.05129e+08	1.21256e+09	8.01771e+07	1.82928e+06	1.06461e+09	8.49253e+08	609729	587235	583491	1.34724e+08	4.85319e+06	1.77981e+07	2.5339e+08	3.43689e+07	1.42457e+07	2.4876e+08	3.9453e+08	4.09881e+08	1.19165e+06	5.94763e+07	8.5666e+07
TRUE		C39 H73 N9 O4 S	Full match	No results	No results	No match	0.32	763.551	764.558	11.651	6	0		No MS2	[M+H]+1	1.24178e+08	2.76306e+06	8.54163e+07	2.29874e+07	4.16052e+07	2.73997e+07	1.53197e+06	1.25105e+08	1.19063e+08	1.1578e+09	8.64571e+07	1.46607e+07	1.48715e+09	2.86091e+08	7.31646e+08	2.58352e+08	2.55554e+06	1.06461e+09	3.02031e+08	1.09419e+06	1.17083e+06	1.10486e+06	1.34724e+08	4.85319e+06	1.53899e+07	2.5339e+08	4.3792e+07	1.28577e+07	2.28929e+07	7.78382e+08	4.51837e+08	2.61811e+06	4.46778e+07	1.11659e+08
TRUE		C6 H21 N9 O S	Full match	No results	No match	No results	-1.73	267.159	266.151	12.916	0	0		DDA for preferred ion	[M-H]-1	3.36267e+07	1.04667e+08	8.86954e+07	4.8219e+07	4.8324e+07	1.05394e+08	4.72217e+07	8.42855e+06	5.48839e+07	5.02756e+07	3.65512e+08	2.859e+08	2.30151e+08	9.25822e+07	7.99013e+07	3.48702e+08	9.76166e+07	1.02251e+08	1.46927e+08	4.84026e+07	4.92994e+07	4.67891e+07	5.59082e+07	6.1712e+07	5.30915e+07	6.94354e+07	6.24278e+07	6.27188e+07	6.67154e+07	1.66164e+08	3.08035e+08	1.64222e+08	1.98721e+08	5.08678e+07
TRUE	Palmitoyl Serinol	C19 H39 N O3	Full match	No results	No results	Full match	2.18	329.294	330.301	9.835	4	0		DDA for preferred ion	[M+H]+1	5.66968e+08	1.48056e+09	5.35177e+08	1.98811e+07	9.3276e+06	2.90451e+07	1.33126e+08	1.17881e+08	2.18147e+07	8.73489e+07	1.1045e+07	2.81803e+07	5.86741e+06	1.89349e+06	850427	1.78099e+06	2.16262e+06	319249	1.25372e+07	188412	134394	114448	2.47388e+07	2.39905e+07	2.43799e+07	2.04561e+07	1.9216e+07	2.52838e+07	2.24552e+07	5.46593e+07	1.38999e+09	1.31696e+09	3.13363e+08	4.18542e+08
TRUE	Spiroxamine	C18 H35 N O2	Full match	No results	No results	Full match	1.61	297.267	330.301	9.831	9	0		DDA for other ion	[M+H+MeOH]+1	5.66968e+08	1.48056e+09	5.35177e+08	1.98811e+07	9.3276e+06	2.90451e+07	1.33126e+08	1.17881e+08	2.18147e+07	8.73489e+07	1.1045e+07	2.81803e+07	5.86741e+06	1.89349e+06	850427	1.78099e+06	2.16262e+06	319249	1.25372e+07	188412	113889	98082.7	2.47388e+07	2.39905e+07	2.43799e+07	2.04561e+07	1.9216e+07	2.52838e+07	2.24552e+07	5.46593e+07	1.38999e+09	1.31696e+09	3.13363e+08	4.18542e+08
TRUE		C36 H63 N5 O7	Full match	No results	No results	No results	0.59	677.473	678.48	10.851	0	0		DDA for preferred ion	[M+H]+1	7.68262e+08	4.01194e+08	6.14802e+08	5.2921e+07	1.68462e+08	4.97564e+08	6.84214e+07	2.83376e+08	3.20164e+08	1.91468e+08	1.11161e+09	7.52752e+08	1.23932e+09	1.67458e+08	6.0644e+08	1.47831e+09	1.1473e+08	3.98665e+08	7.20309e+08	840411	735149	545300	1.65949e+08	1.63473e+08	1.74715e+08	1.67019e+08	1.7103e+08	1.95102e+08	1.73579e+08	6.53326e+08	3.47828e+08	9.02476e+08	6.65627e+08	9.15539e+08
TRUE		C36 H70 N7 O6 P	Full match	No results	No results	No match	2.6	727.514	728.522	13.289	40	0		No MS2	[M+H]+1	884314	1.3866e+08	8.99989e+07	1.87597e+08	2.95007e+08	809121	2.06236e+08	1.50381e+08	1.47809e+08	3.61284e+08	1.04808e+06	9.62775e+07	1.22878e+08	1.04243e+08	1.41062e+08	1.07479e+06	9.98668e+07	1.41643e+08	1.31784e+08	608973	593108	609053	9.53187e+07	783883	760685	683804	687261	722576	856858	1.00794e+08	889256	2.01123e+08	3.57667e+07	1.16069e+08
TRUE		C72 H113 N10 O16 P	Full match	No results	No results	No results	0.08	1404.81	703.411	8.925	0	0		DDA for other ion	[M+2H]+2	6.02677e+07	1.00995e+08	3.7922e+06	5.76037e+06	5.60876e+06	1.80697e+07	4.09897e+06	1.4546e+07	7.58858e+06	2.03793e+07	3.33397e+08	1.28925e+08	7.55921e+06	6.27169e+07	1.2629e+07	5.38134e+08	8.52604e+06	1.28518e+07	3.03923e+07	1.45446e+06	1.28499e+06	1.98346e+06	3.92586e+07	4.47881e+07	3.96215e+07	2.18221e+07	3.56235e+07	4.38264e+07	3.52558e+07	4.24539e+06	1.40794e+07	6.79282e+06	2.36895e+08	6.0494e+08
TRUE		C24 H36 N8 O3	Full match	No results	No results	No match	-3.83	484.289	243.152	8.97	2	0		No MS2	[M+2H]+2	1.25846e+07	1.82803e+07	1.15862e+06	1.01351e+06	842723	4.6982e+06	1.31189e+06	2.97927e+06	1.53815e+06	2.58714e+06	5.83939e+07	2.3833e+07	1.85332e+06	1.2345e+07	2.77926e+06	1.15644e+08	1.83607e+06	4.82513e+06	6.90195e+06	480549	1.01052e+06	550351	7.16577e+06	8.14818e+06	7.70348e+06	5.65549e+06	8.47947e+06	1.00932e+07	9.77365e+06	882590	2.17327e+06	2.00214e+06	3.74744e+07	1.52847e+08
TRUE		C27 H52 N2 O10	Full match	No results	No results	No results	4.77	564.365	565.372	11.074	0	0		DDA for preferred ion	[M+H]+1	1.82614e+08	4.75919e+07	1.16685e+08	1.64354e+07	4.7018e+07	9.87221e+07	3.50613e+07	4.8911e+07	7.25457e+07	4.94054e+07	4.11476e+08	1.34708e+08	2.15001e+08	4.68118e+07	6.86728e+07	1.32448e+09	4.53399e+07	7.4083e+07	1.1123e+08	2.94639e+06	1.24451e+07	3.98887e+06	1.50877e+07	7.73129e+06	3.51925e+07	3.77406e+07	2.53963e+07	3.84794e+07	3.75345e+07	6.70937e+07	6.6834e+07	1.12755e+08	1.34377e+08	1.67597e+08
TRUE		C47 H80 N5 O4 P	Full match	No results	No results	No match	0.04	809.595	810.602	12.261	46	0		No MS2	[M+H]+1	2.29453e+08	7.57539e+06	6.12869e+08	4.03987e+08	3.62414e+08	2.21743e+08	5.65399e+06	1.45043e+09	6.85246e+08	3.85687e+08	2.67514e+08	1.51648e+07	1.66651e+08	1.8314e+08	2.0495e+08	9.75273e+07	1.50149e+07	2.03486e+08	1.46548e+08	632811	536711	641875	1.04047e+08	2.63036e+08	7.19614e+08	7.07628e+07	2.35135e+08	4.11201e+08	1.92559e+08	1.4516e+08	1.75528e+08	7.4163e+06	4.65763e+08	1.45456e+08
TRUE		C37 H78 N7 O5 P	Full match	No results	No results	No match	1.15	731.581	810.602	12.258	14	0		No MS2	[M+DMSO+H]+1	2.29453e+08	1.66793e+07	6.12869e+08	4.03987e+08	3.62414e+08	2.21743e+08	5.65399e+06	1.45043e+09	6.85246e+08	3.85687e+08	2.67514e+08	1.22329e+07	1.66651e+08	1.8314e+08	2.0495e+08	9.75273e+07	1.06626e+07	2.03486e+08	1.46548e+08	348186	319004	381510	1.04047e+08	2.63036e+08	7.19614e+08	5.935e+07	2.35135e+08	4.11201e+08	1.92559e+08	1.4516e+08	1.75528e+08	7.4163e+06	4.65763e+08	1.45456e+08
TRUE		C37 H75 N9 O3 P2	Full match	No results	No results	No match	-1.84	755.545	756.553	12.06	48	0		No MS2	[M+H]+1	6.58674e+08	5.00443e+06	7.35085e+08	2.70037e+08	3.91299e+08	5.87337e+08	2.81634e+06	1.38088e+09	1.12355e+09	1.45028e+09	6.3006e+08	2.58151e+06	2.08344e+08	3.51985e+08	4.49595e+08	1.37292e+08	1.54348e+06	2.67385e+08	1.61475e+08	339402	328281	351674	1.9387e+08	2.20478e+08	6.65103e+08	8.05633e+07	1.57094e+08	2.02597e+08	8.28062e+06	1.35516e+08	3.91144e+08	666538	1.75755e+08	2.38679e+08
TRUE	7-OXOCHOLESTEROL	C27 H44 O2	Full match	No results	Partial match	Full match	1.29	400.335	401.342	13.544	58	0		No MS2	[M+H]+1	1.9667e+06	1.03194e+06	1.19119e+06	524448	2.54145e+06	2.67686e+06	1.53361e+06	846556	435942	820536	1.15632e+07	1.61191e+07	3.06191e+06	497989	525430	765884	2.6363e+06	507948	431374	366099	378490	387489	689080	447622	510675	613562	465802	470489	437246	1.22141e+06	5.5934e+06	606985	3.8326e+07	8.2776e+06
TRUE	1-O-palmitoyl-2-O-arachidonoyl-sn-glycero-3-phosphocholine	C44 H81 N O8 P	No results	No results	No results	Full match	-3.87	782.567	783.574	13.384	1	0		No MS2	[M+H]+1	4.16294e+07	1.00037e+09	3.51919e+08	4.51316e+08	3.35985e+08	4.71859e+07	6.81194e+08	2.88148e+08	6.83894e+08	3.63001e+08	4.21926e+07	5.48254e+08	4.80664e+08	5.46717e+08	6.75937e+08	2.60257e+07	6.31349e+08	4.81854e+08	1.62721e+08	1.05017e+06	1.0202e+06	1.01301e+06	1.94968e+08	3.52695e+07	1.10055e+08	3.40293e+07	3.8385e+07	4.90722e+07	1.12506e+07	3.8618e+08	2.8715e+07	4.23676e+08	4.1728e+08	5.57481e+08
TRUE		C17 H41 N4 O3 P	Full match	No results	No results	No match	1.31	380.292	783.574	13.311	15	0		No MS2	[2M+Na]+1	1.25247e+07	1.00037e+09	3.51919e+08	4.51316e+08	3.35985e+08	1.33905e+07	6.81194e+08	2.88148e+08	6.83894e+08	3.63001e+08	9.13663e+06	5.48254e+08	4.80664e+08	5.46717e+08	6.83296e+08	6.29556e+06	6.31349e+08	4.81854e+08	1.62721e+08	451200	466599	516472	1.94968e+08	9.82263e+06	1.10055e+08	8.94664e+06	1.00752e+07	1.45118e+07	2.40472e+06	3.8618e+08	7.65826e+06	4.23676e+08	4.1728e+08	5.57481e+08
TRUE		C27 H55 O3 P3	Full match	No results	No results	No match	3.05	520.338	521.345	11.124	4	0		No MS2	[M+H]+1	5.89987e+08	5.575e+08	4.51753e+07	2.17676e+08	2.46772e+08	2.40221e+08	2.10252e+08	5.24027e+08	2.87955e+08	4.22264e+08	1.12357e+09	2.0851e+07	8.4703e+08	3.38464e+08	5.69364e+07	2.98926e+08	3.12433e+08	1.37508e+08	9.39643e+07	2.19647e+06	640768	1.53802e+06	6.226e+07	9.87053e+06	5.43697e+07	1.06583e+07	5.57325e+07	6.18884e+07	5.46918e+07	8.52344e+08	8.38023e+08	1.16261e+09	8.52996e+08	7.28002e+08
TRUE	Linoleyl carnitine	C25 H45 N O4	Full match	No results	No results	Full match	2.37	423.336	424.343	9.689	3	0		DDA for preferred ion	[M+H]+1	7.59182e+08	2.33532e+08	5.3953e+08	9.38105e+07	3.73516e+08	1.28223e+08	2.07956e+08	2.33953e+08	2.81931e+08	9.57306e+07	5.07209e+08	3.40049e+08	4.2011e+08	8.13796e+07	3.69894e+07	6.44076e+07	7.17108e+07	4.44885e+07	1.07226e+08	121960	142624	108145	2.82192e+07	2.77571e+07	3.07936e+07	3.03241e+07	2.73846e+07	3.30264e+07	3.51939e+07	5.32885e+08	3.8006e+08	1.43819e+09	7.39738e+08	7.78334e+08
TRUE	1-(9Z-octadecenoyl)-sn-glycero-3-phospho-(1′-sn-glycerol)	C24 H47 O9 P	Full match	No results	No results	Full match	1.43	510.296	509.289	10.372	3	0		DDA for preferred ion	[M-H]-1	208055	3.58283e+08	4.85954e+08	3.20827e+08	2.40103e+08	338978	1.71275e+08	1.20876e+08	2.64136e+08	3.28638e+08	207951	5.95192e+07	1.48247e+08	5.87439e+07	1.4083e+08	223668	1.08785e+08	2.28216e+08	8.4108e+07	179509	186434	193205	2.40364e+07	254502	803142	305248	326449	631009	210248	1.87369e+08	266676	6.30344e+08	3.96324e+08	5.4114e+08
TRUE		C46 H82 N8 O15	Full match	No results	No results	No match	-0.47	986.59	494.302	8.781	2	0		DDA for other ion	[M+2H]+2	5.01967e+07	4.37575e+07	2.10475e+07	2.15394e+07	1.72203e+07	3.49413e+07	2.98149e+07	3.1445e+07	2.7729e+07	2.50631e+07	1.7205e+08	9.02109e+07	5.34578e+07	5.7399e+07	2.75241e+07	2.05525e+08	2.62278e+07	3.87941e+07	4.05455e+07	2.47676e+07	2.08198e+07	2.36058e+07	3.50161e+07	3.74185e+07	3.83585e+07	5.45378e+07	4.27428e+07	3.80977e+07	3.60017e+07	2.72338e+07	2.70979e+07	2.76287e+07	9.98566e+07	3.17134e+08
TRUE		C27 H44 N6 O	Full match	No results	No results	No match	2.78	468.359	469.366	14.795	12	0		DDA for preferred ion	[M+H]+1	2.15533e+08	1.03503e+08	1.37776e+07	3.76995e+07	3.08037e+06	349225	7.85543e+07	5.17317e+07	5.71233e+07	5.61314e+07	8.58489e+08	3.2824e+08	3.69992e+08	5.67867e+08	1.65551e+08	1.03552e+09	8.54315e+08	4.15747e+08	9.3215e+08	223676	234162	259583	1.23235e+08	6.25715e+07	1.05077e+08	4.03972e+08	6.03495e+08	6.05606e+08	6.38894e+08	1.29391e+08	9.86718e+08	2.4806e+08	1.4193e+09	2.86354e+08
TRUE	(3β,16α)-3,16-Dihydroxy-24-methylenelanost-8-en-21-oic acid	C31 H50 O4	Full match	No results	No results	Full match	-3.1	486.369	469.366	14.667	3	0		DDA for other ion	[M+H-H2O]+1	1.49381e+08	1.04018e+08	1.37776e+07	3.76995e+07	3.08037e+06	8.13395e+07	7.87614e+07	5.17317e+07	5.75362e+07	5.61314e+07	3.88326e+06	3.2824e+08	3.69992e+08	2.00346e+06	1.65551e+08	1.0938e+07	446893	4.15747e+08	2.96314e+06	359047	304304	358532	1.24045e+08	6.87386e+07	7.31037e+07	3.87631e+08	6.03495e+08	3.19882e+08	6.38894e+08	1.29391e+08	1.0078e+09	2.57069e+08	1.4193e+09	3.21096e+08
TRUE	Pulcherriminic acid	C12 H20 N2 O4	Full match	No results	No results	Full match	1.6	256.143	257.15	6.587	1	0		DDA for preferred ion	[M+H]+1	465312	797211	620528	9.4106e+06	1.41908e+09	370219	413443	395436	4.05181e+07	1.05307e+06	233431	4.14672e+06	212129	8.22648e+06	673971	3.61732e+06	2.99033e+06	276006	1.70203e+06	105771	97172.4	93931.7	3.1106e+06	8.82608e+06	6.10672e+06	3.96863e+06	4.44795e+06	9.67088e+06	2.08221e+06	2.02816e+06	1.23969e+08	878953	3.20414e+06	3.37567e+06
TRUE		C12 H17 N O4	Full match	No results	No results	No results	2.24	239.116	257.15	6.624	0	0		DDA for other ion	[M+NH4]+1	236330	797211	299380	9.4106e+06	1.41908e+09	125885	350975	188473	4.05181e+07	1.05307e+06	125847	4.14672e+06	102344	8.22648e+06	510666	1.17114e+06	1.96554e+06	144852	1.70203e+06	43059.6	48304.8	40692.2	4.82688e+06	4.16447e+06	3.77132e+06	3.96863e+06	4.44795e+06	9.67088e+06	2.08221e+06	2.02816e+06	1.23969e+08	766475	3.20414e+06	3.37567e+06
TRUE	Linoleic acid	C18 H32 O2	Full match	Full match	Full match	Full match	0.72	280.24	279.233	11.739	123	4	10	DDA for preferred ion	[M-H]-1	4.9905e+08	5.78785e+08	2.97319e+08	1.27775e+08	5.90398e+07	1.1999e+08	8.90213e+07	5.2315e+08	2.22543e+08	3.26025e+08	5.06485e+08	4.42621e+08	4.94231e+08	1.73919e+08	5.19251e+08	2.30467e+08	2.74365e+08	6.91756e+08	3.61522e+08	462461	387398	1.34432e+06	5.73895e+07	4.89083e+07	4.89295e+07	6.57346e+07	5.06688e+07	5.50037e+07	6.28503e+07	1.92142e+08	6.60334e+08	3.17295e+08	4.86781e+08	4.35435e+08
TRUE		C50 H88 N10 O6 P2	Full match	No results	No results	No results	-0.32	986.636	987.643	10.826	0	0		No MS2	[M+H]+1	1.54586e+06	4.89375e+07	6.20805e+06	738321	700048	1.24729e+06	586659	1.16711e+06	1.7832e+06	2.16296e+07	1.9844e+06	2.40222e+06	2.44813e+06	940247	1.12275e+06	2.68726e+06	828265	1.4166e+06	1.59033e+06	393731	466053	412851	706855	754739	737630	663587	683522	804842	508252	2.69757e+06	2.7041e+07	1.59234e+07	2.45552e+07	3.83783e+07
TRUE		C45 H78 N5 O3 P	Full match	No results	No results	No match	-0.33	767.584	768.591	11.747	20	0		No MS2	[M+H]+1	4.68806e+07	5.66316e+07	2.20277e+07	1.45e+08	6.52425e+07	2.65096e+06	1.5894e+07	8.73049e+06	5.98325e+07	6.10921e+07	1.02797e+07	2.81585e+07	2.17372e+08	6.01618e+08	2.27547e+08	1.18552e+08	3.15686e+07	3.28805e+08	2.28482e+08	1.64846e+06	1.58764e+06	1.57752e+06	1.64967e+07	2.85619e+07	3.31302e+07	1.1911e+07	8.58797e+07	4.65551e+07	1.41013e+09	1.60759e+08	6.00394e+07	1.82329e+07	3.401e+08	1.29372e+08
TRUE		C18 H41 N2 O3 P	Full match	No results	No results	No results	3.63	364.287	770.608	13.237	0	0		DDA for other ion	[2M+ACN+H]+1	1.14048e+08	8.30018e+06	1.77769e+08	1.15406e+08	9.6745e+07	1.08867e+08	1.08806e+07	1.9632e+08	1.79066e+08	4.79775e+08	1.25892e+08	6.02239e+06	5.41655e+08	3.81444e+08	8.64727e+08	1.16895e+08	7.69423e+06	1.33164e+09	1.07943e+09	871536	899470	913956	1.20262e+08	2.04924e+07	5.53695e+07	1.30279e+08	8.26974e+07	9.49436e+07	2.51656e+08	1.06834e+08	5.37686e+07	7.80339e+06	3.77201e+08	2.68882e+08
TRUE		C39 H81 N9 O2 P2	Full match	No results	No results	No match	1.52	769.6	770.607	13.289	18	0		No MS2	[M+H]+1	9.30594e+07	7.95285e+06	1.58619e+08	1.1139e+08	8.22181e+07	8.14536e+07	1.08806e+07	1.9632e+08	1.79066e+08	4.37926e+08	1.16154e+08	6.02239e+06	4.76153e+08	3.81444e+08	8.64727e+08	1.16895e+08	4.99799e+06	1.33164e+09	1.07943e+09	1.16052e+06	1.19905e+06	1.19794e+06	1.20262e+08	1.58218e+07	4.49548e+07	1.30279e+08	8.26974e+07	7.70889e+07	2.4691e+08	1.92704e+08	1.12128e+08	7.80339e+06	3.77201e+08	2.37952e+08
TRUE	(2Z)-2-Benzylideneheptanoic acid	C14 H18 O2	Full match	Invalid mass	No results	Full match	-2.91	218.13	478.294	10.738	15	1		DDA for other ion	[2M+ACN+H]+1	3.97276e+08	5.53371e+08	2.63439e+08	2.65875e+08	1.16887e+08	1.20319e+08	2.14606e+08	4.60688e+08	2.02848e+08	2.91853e+08	9.06367e+08	1.64201e+08	1.92657e+08	2.56371e+08	1.10684e+08	2.47892e+08	2.56053e+08	7.79582e+07	1.34713e+08	239122	245896	268058	4.26949e+07	4.42658e+07	4.36365e+07	3.77619e+07	4.34646e+07	5.76884e+07	5.56004e+07	2.54704e+08	5.21497e+08	1.05669e+09	4.5443e+08	3.90946e+08
TRUE	Paraldehyde	C6 H12 O3	Full match	No results	No results	Full match	1.31	132.079	133.086	9.026	24	0		No MS2	[M+H]+1	6.672e+06	1.6761e+07	881372	829802	590144	2.10316e+06	815049	974445	850933	4.3868e+06	3.76358e+07	1.71172e+07	5.60718e+06	6.37306e+06	1.24459e+06	1.02487e+08	892312	1.20927e+06	6.96069e+06	534842	320500	574534	2.77939e+06	3.94271e+06	2.93092e+06	4.94702e+06	5.78302e+06	4.28799e+06	4.03541e+06	778905	1.34746e+06	1.49605e+06	2.56788e+07	1.15208e+08
TRUE		C37 H84 N7 O4 P3	Full match	No results	No results	No match	-0.02	783.58	784.587	11.36	48	0		No MS2	[M+H]+1	3.85634e+07	1.96478e+06	9.84713e+07	7.0144e+07	1.03581e+08	6.9683e+08	1.29015e+06	1.73189e+08	1.016e+08	1.39676e+09	5.37779e+07	5.10055e+06	2.42272e+07	3.32973e+07	4.81391e+07	3.71302e+07	1.66604e+06	7.06987e+07	2.76134e+07	820381	829356	747831	4.16125e+07	1.00315e+08	1.58624e+08	2.65438e+07	7.2516e+07	7.54915e+07	2.02876e+07	1.75315e+07	2.85352e+08	1.5525e+06	4.47266e+07	2.31766e+07
TRUE		C39 H72 N5 O4 P	Full match	No results	No results	No match	-0.38	705.532	706.539	12.999	34	0		No MS2	[M+H]+1	1.42421e+06	5.25098e+06	3.68477e+07	5.04509e+06	2.05977e+06	1.15882e+06	2.005e+06	3.06107e+06	2.39033e+06	1.46001e+07	1.35364e+06	9.62144e+06	9.98534e+06	1.93953e+06	1.60083e+07	1.4237e+06	4.71899e+06	1.50322e+06	7.1827e+06	637400	673640	669765	4.06937e+06	930976	1.0094e+06	995087	964577	885156	846964	2.49659e+07	1.58558e+06	8.37827e+07	2.14936e+06	5.61187e+06
TRUE		C39 H81 N3 O5 P2	Full match	No results	No results	No match	-1.97	733.564	734.571	11.282	39	0		No MS2	[M+H]+1	6.02283e+06	1.70561e+06	4.83654e+06	4.0916e+07	6.86983e+06	1.1021e+07	1.05934e+06	4.64757e+06	9.45253e+06	1.133e+07	1.00265e+07	1.50232e+06	6.63191e+06	1.91626e+07	1.52087e+07	6.65821e+06	1.44628e+06	9.32228e+06	6.37871e+06	754200	731930	804944	8.67298e+06	1.03714e+06	2.27442e+06	9.8784e+06	4.56075e+06	2.78385e+06	2.06675e+08	9.34859e+06	4.21339e+06	7.29873e+06	6.4312e+06	1.93445e+06
TRUE		C39 H75 N O13	Full match	No results	No results	No results	2.12	765.525	766.533	10.863	0	0		DDA for preferred ion	[M+H]+1	4.72174e+08	3.58955e+08	4.31316e+08	2.96232e+07	9.37144e+07	3.16396e+08	4.45786e+07	2.34256e+08	3.30885e+08	1.16418e+08	7.69441e+08	7.04837e+08	8.87521e+08	9.7418e+07	2.87557e+08	9.97216e+08	5.53438e+07	3.7561e+08	3.89204e+08	679346	750954	655395	1.04176e+08	1.02396e+08	1.07723e+08	1.05541e+08	1.06558e+08	1.21158e+08	1.05736e+08	3.81497e+08	3.64006e+08	5.19245e+08	4.31688e+08	6.52962e+08
TRUE	(2R)-2-Acetoxy-3-[(11Z)-11-hexadecen-1-yloxy]propyl 2-(trimethylammonio)ethyl phosphate	C26 H52 N O7 P	Full match	No results	No results	Full match	2.05	521.349	522.356	11.25	10	0		DDA for preferred ion	[M+H]+1	6.70053e+08	1.31295e+09	7.39162e+08	5.06438e+08	1.82438e+08	4.39791e+08	4.28852e+08	5.87582e+08	4.2214e+08	8.09681e+08	6.45788e+08	3.73967e+08	3.77902e+08	2.9819e+08	1.33333e+08	2.58298e+08	3.6787e+08	1.91418e+08	1.89975e+08	404917	392961	359783	7.515e+07	6.34878e+07	6.80593e+07	7.31655e+07	6.77056e+07	7.22864e+07	7.20231e+07	4.36972e+08	1.22009e+09	7.89668e+08	9.63237e+08	8.91528e+08
TRUE	Drinidene	C10 H9 N O	No results	No results	No results	Full match	-0.79	159.068	177.102	6.931	5	0		DDA for other ion	[M+NH4]+1	8.2152e+06	1.73734e+07	2.68706e+06	1.65677e+06	2.46842e+06	7.30188e+06	1.99761e+06	9.66623e+06	5.8458e+06	3.57326e+06	9.4974e+07	2.72273e+07	2.67864e+07	6.51734e+06	3.21136e+06	4.80272e+06	8.21932e+06	3.59483e+06	5.38442e+06	66271.7	88417.2	71970.5	5.39054e+06	5.31055e+06	5.85239e+06	5.66953e+06	6.28911e+06	6.83225e+06	3.58586e+06	1.3773e+09	1.25188e+07	1.24758e+06	2.86402e+07	9.02998e+06
TRUE	Serotonin	C10 H12 N2 O	No results	No results	No results	Full match	-0.71	176.095	177.102	6.95	3	0		DDA for preferred ion	[M+H]+1	8.2152e+06	1.73734e+07	2.68706e+06	1.65677e+06	2.98762e+06	7.30188e+06	1.99761e+06	9.66623e+06	5.8458e+06	3.57326e+06	9.4974e+07	2.72273e+07	2.67864e+07	6.51734e+06	3.21136e+06	4.80272e+06	8.21932e+06	3.59483e+06	5.38442e+06	93340.9	92658.5	75422.8	5.39054e+06	5.31055e+06	5.85239e+06	5.66953e+06	6.28911e+06	6.83225e+06	3.58586e+06	1.3773e+09	1.25188e+07	1.24758e+06	2.86402e+07	9.02998e+06
TRUE		C32 H55 N5 O5	Full match	No results	No results	No results	0.44	589.421	590.428	10.887	0	0		DDA for preferred ion	[M+H]+1	6.45353e+08	3.37076e+08	4.34503e+08	6.21551e+07	1.67268e+08	3.62549e+08	7.35638e+07	2.20813e+08	2.27133e+08	1.66371e+08	7.23909e+08	5.22831e+08	8.84933e+08	1.91151e+08	6.71988e+08	4.44467e+08	1.37932e+08	2.88354e+08	8.17031e+08	1.76388e+06	2.13573e+06	1.78125e+06	1.49493e+08	1.50737e+08	1.58745e+08	1.38532e+08	1.47552e+08	1.71378e+08	1.51249e+08	6.0005e+08	2.38616e+08	7.9535e+08	5.11623e+08	5.94291e+08
TRUE		C15 H25 Cl N8	Full match	No results	No results	No match	2.23	352.19	177.102	6.93	2	0		DDA for preferred ion	[M+2H]+2	7.87425e+06	1.73734e+07	2.68706e+06	1.65677e+06	2.93824e+06	7.30188e+06	2.22989e+06	9.16814e+06	5.8458e+06	3.57326e+06	9.4974e+07	2.75199e+07	2.68091e+07	4.85766e+06	1.931e+06	4.25988e+06	9.95749e+06	3.59483e+06	4.28239e+06	64440.8	85974.5	69982.1	5.39054e+06	5.31055e+06	4.03526e+06	5.60657e+06	6.28911e+06	6.83225e+06	4.60511e+06	1.37509e+09	1.25188e+07	1.24758e+06	2.56334e+07	9.02998e+06
TRUE		C36 H72 N3 O9 P	Full match	No results	No results	No results	-1.4	721.5	722.507	10.86	0	0		DDA for preferred ion	[M+H]+1	6.31508e+08	3.84061e+08	5.36978e+08	4.27683e+07	1.31934e+08	4.39561e+08	5.96688e+07	2.76398e+08	3.30517e+08	1.57616e+08	1.03031e+09	7.63984e+08	1.14217e+09	1.3328e+08	4.32362e+08	1.37421e+09	8.69823e+07	4.02013e+08	5.27804e+08	951034	694632	1.03239e+06	1.40911e+08	1.39771e+08	1.4536e+08	1.38637e+08	1.45178e+08	1.66458e+08	1.4254e+08	5.59944e+08	3.65261e+08	7.24235e+08	5.65935e+08	8.21397e+08
TRUE		C19 H32 O3 S	Full match	No results	No results	No results	0.6	340.207	339.2	10.115	0	0		DDA for preferred ion	[M-H]-1	2.16946e+07	2.42163e+08	2.69288e+08	2.84029e+08	3.19195e+08	2.25911e+07	2.45239e+08	2.77584e+08	2.39727e+08	2.13516e+08	1.97548e+07	3.31809e+08	1.37205e+09	3.95161e+08	3.33417e+08	2.55419e+07	3.04837e+08	3.24768e+08	1.73735e+08	3.73741e+07	3.54527e+07	3.4512e+07	9.66658e+07	2.48773e+07	2.71749e+07	1.86568e+07	2.3549e+07	2.55122e+07	2.71571e+07	2.30658e+08	1.82042e+07	4.8042e+08	1.84338e+08	2.14227e+08
TRUE		C31 H63 O5 P3	Full match	No results	No results	No results	4.18	608.391	609.399	11.132	0	0		DDA for preferred ion	[M+H]+1	8.33221e+07	2.07426e+07	4.67354e+07	1.49895e+07	4.48657e+07	4.58967e+07	2.99081e+07	4.63879e+07	7.80546e+07	1.86237e+07	1.76718e+08	2.07049e+08	2.58373e+08	4.18744e+07	7.42673e+07	4.45636e+08	1.46357e+07	9.35216e+07	1.2769e+08	1.09448e+06	599628	1.12217e+06	1.27305e+07	3.7749e+07	1.61097e+07	1.70684e+07	3.56834e+07	1.35314e+07	4.13592e+07	7.33335e+07	7.30561e+07	1.42244e+08	5.78983e+07	7.85573e+07
TRUE		C40 H79 N3 O5 P2	Full match	No results	No results	No match	-1.79	743.548	744.555	13.266	52	0		No MS2	[M+H]+1	1.34866e+06	2.81103e+08	8.19038e+08	1.65092e+08	1.85854e+08	1.19314e+06	9.35395e+07	2.34592e+08	1.83617e+08	2.19796e+08	2.00818e+06	3.24427e+08	3.06276e+08	3.02263e+08	3.42522e+08	1.38068e+06	4.3263e+08	2.72458e+08	6.04541e+07	718222	774998	718316	1.35078e+08	1.18214e+06	926877	989055	949087	880779	1.13793e+06	2.79415e+08	1.1147e+06	3.34095e+08	9.55788e+07	2.36742e+08
TRUE	Colfosceril palmitate	C40 H80 N O8 P	Full match	No results	No results	Full match	2.06	733.564	734.571	11.892	39	0		No MS2	[M+H]+1	3.68963e+08	3.75216e+06	5.19047e+08	4.90111e+08	8.32188e+08	1.70387e+08	1.58751e+07	8.35173e+08	6.81508e+08	7.75448e+08	2.64027e+08	2.30696e+06	2.63544e+08	4.39916e+08	4.90813e+08	2.38982e+08	9.98491e+06	2.43316e+08	9.51262e+08	835405	865378	821705	2.92167e+08	3.06862e+07	5.91412e+08	1.31052e+08	3.7636e+08	3.42749e+08	1.46918e+07	2.21882e+08	2.5754e+08	2.47758e+06	2.18043e+08	3.16976e+08
TRUE	1-[(9Z)-hexadecenoyl]-sn-glycero-3-phosphocholine	C24 H48 N O7 P	Full match	No results	No results	Full match	1.84	493.318	494.325	10.646	3	0		DDA for preferred ion	[M+H]+1	7.19348e+07	3.86248e+08	2.01895e+08	7.91675e+07	1.95327e+07	2.68402e+07	4.29186e+07	3.97052e+07	9.4746e+07	3.74558e+08	1.27233e+08	5.62782e+07	7.51686e+07	3.92726e+07	1.4444e+07	2.65283e+07	4.71188e+07	3.62236e+07	3.11874e+07	304527	305351	287966	1.72629e+07	1.65583e+07	1.3838e+07	1.58012e+07	1.53865e+07	1.78808e+07	1.84715e+07	6.91412e+07	2.43287e+08	1.41013e+08	2.39234e+08	2.65726e+08
TRUE		C38 H82 N8 O8 S	Full match	No results	No results	No results	0.01	810.598	811.605	12.994	0	0		No MS2	[M+H]+1	9.20515e+07	5.55063e+06	7.98217e+07	2.33538e+07	7.18064e+07	8.68182e+07	2.59389e+06	1.59378e+08	6.90756e+07	1.82697e+08	1.12426e+08	4.78759e+06	2.39722e+07	1.69917e+07	9.05879e+07	3.16656e+07	1.73978e+07	2.40165e+07	1.87351e+07	1.72389e+06	1.72091e+06	1.5455e+06	2.11936e+07	8.3848e+07	1.78606e+08	8.15539e+07	5.94168e+07	5.81006e+07	1.35729e+09	4.54788e+07	5.77097e+07	1.10331e+07	6.8125e+07	3.47534e+07
TRUE	N-Palmitoyl-L-threonine	C20 H39 N O4	Full match	No results	No results	Full match	1.86	357.289	358.296	9.317	1	0		DDA for preferred ion	[M+H]+1	1.89249e+07	1.17348e+08	2.29902e+07	1.63019e+07	1.35581e+09	7.29957e+06	1.05701e+07	1.65476e+07	5.65308e+07	1.61038e+07	3.726e+06	2.88098e+07	3.9474e+06	1.89129e+07	3.59419e+06	5.62128e+06	4.78978e+06	3.85379e+06	7.17546e+06	196765	153753	100366	4.00854e+06	5.42904e+06	5.77971e+06	6.29909e+06	6.4653e+06	4.81941e+06	6.26861e+06	2.68883e+07	2.20644e+08	2.43533e+07	4.54858e+07	9.55492e+07
TRUE	NP-008993	C18 H34 O4	Full match	Full match	No results	Partial match	0.36	314.246	295.228	10.536	44	5	8.4	DDA for preferred ion	[M-H-H2O]-1	2.78938e+07	2.29957e+07	9.73931e+06	1.64626e+07	3.11161e+07	1.94755e+07	3.25241e+07	2.93049e+07	2.64485e+07	2.17063e+07	5.2027e+07	5.49617e+07	4.29743e+07	2.29462e+07	2.99856e+07	3.11846e+07	3.22796e+07	2.43106e+07	2.43001e+07	6.11678e+06	5.00687e+06	3.77395e+06	6.54828e+06	6.43145e+06	5.80718e+06	6.01643e+06	6.34934e+06	6.38156e+06	6.77361e+06	5.54997e+07	3.30942e+07	3.4728e+07	3.37954e+08	5.39095e+07
TRUE		C41 H81 N3 O4 P2	Full match	No results	No results	No match	-1.63	741.569	742.576	10.179	10	0		No MS2	[M+H]+1	2.18764e+06	2.4436e+06	2.03285e+06	2.69176e+06	1.44078e+06	2.53656e+06	4.44124e+06	1.72009e+06	4.08896e+06	2.80345e+06	3.70814e+06	2.21383e+06	9.81454e+06	1.77315e+07	4.07769e+06	3.50255e+06	5.03958e+06	1.23214e+07	1.1486e+07	4.15192e+06	2.88544e+06	7.2264e+06	2.16937e+06	4.54564e+06	2.27971e+06	4.6021e+06	5.03509e+06	2.72394e+06	1.07869e+09	1.00917e+07	2.89587e+06	2.05869e+06	3.59781e+06	2.70943e+06
TRUE		C35 H77 N9 O3 P2	Full match	No results	No results	No match	1.86	733.564	734.571	12.259	39	0		No MS2	[M+H]+1	5.11608e+08	6.88147e+06	4.84829e+08	2.54557e+08	3.59848e+08	5.0954e+08	1.58751e+07	1.34679e+09	7.99206e+08	8.04841e+08	5.58252e+08	3.01368e+06	1.77225e+08	3.77135e+08	2.91288e+08	1.43121e+08	2.85862e+06	2.12156e+08	1.39669e+08	554396	470205	562337	2.6152e+08	2.95965e+08	6.55801e+08	7.2349e+07	2.24742e+08	2.1289e+08	2.69661e+07	1.4685e+08	3.12161e+08	5.7039e+06	2.11366e+08	2.41133e+08
TRUE		C39 H77 N3 O5 P2	Full match	No results	No results	No match	-1.91	729.532	730.54	12.258	41	0		No MS2	[M+H]+1	1.5172e+06	4.73274e+08	6.60813e+08	3.64233e+08	2.03289e+08	1.55357e+06	2.07731e+08	2.87367e+08	1.56839e+08	5.02374e+08	1.78453e+06	2.44741e+08	1.44696e+08	1.62828e+08	2.57046e+08	1.50693e+06	2.67678e+08	2.12156e+08	8.72125e+07	621369	527006	630269	8.75325e+07	1.02415e+06	3.09904e+06	1.00521e+06	1.03474e+06	1.10812e+06	1.33523e+06	1.98203e+08	1.81027e+06	2.345e+08	2.11366e+08	4.44865e+08
TRUE		C26 H48 N5 O3 P	Full match	No results	No results	No match	-0.74	509.349	510.356	11.69	7	0		No MS2	[M+H]+1	2.42855e+08	1.33394e+09	3.44815e+08	6.73656e+07	6.08854e+07	7.28404e+07	8.79058e+07	2.37796e+08	1.72152e+08	1.57738e+08	1.52165e+08	8.30868e+07	1.0279e+08	6.22873e+07	2.89463e+07	5.20199e+07	1.31371e+08	5.74362e+07	2.63006e+07	348870	339235	334887	8.09822e+06	9.7511e+06	6.96474e+06	7.3558e+06	7.56496e+06	1.09373e+07	1.3284e+07	1.8966e+08	3.99365e+08	2.62314e+08	3.08769e+08	3.4471e+08
TRUE	Bis(2-ethylhexyl) phthalate	C24 H38 O4	Full match	No results	No results	Full match	2.11	390.278	413.267	12.716	63	0		DDA for other ion	[M+Na]+1	9.29971e+08	1.01383e+09	4.73389e+08	7.44329e+08	7.51275e+08	1.20247e+09	1.18875e+09	5.50708e+08	5.05764e+08	5.73768e+08	6.8727e+08	4.67226e+08	1.50808e+08	1.90545e+08	1.40764e+08	1.33338e+09	6.94913e+08	2.83655e+08	5.95785e+08	2.60519e+08	2.27692e+08	2.33212e+08	1.8043e+08	2.17891e+08	1.03585e+08	1.77645e+08	1.89686e+08	1.46656e+08	2.82102e+08	4.27543e+08	1.30098e+09	4.46185e+08	7.70564e+08	4.43182e+08
TRUE		C20 H37 N4 O3 P	Full match	No results	No results	No match	-1.05	412.26	413.267	12.697	3	0		No MS2	[M+H]+1	9.29971e+08	1.01383e+09	4.73389e+08	7.44329e+08	7.51275e+08	1.20247e+09	1.18875e+09	5.50708e+08	5.05764e+08	5.73768e+08	6.8727e+08	4.67226e+08	1.50808e+08	1.95247e+08	1.57161e+08	1.33338e+09	6.94913e+08	2.83655e+08	5.95785e+08	2.60519e+08	2.27692e+08	2.33212e+08	1.8043e+08	2.17891e+08	1.03585e+08	1.77645e+08	1.89686e+08	1.46656e+08	2.82102e+08	4.27543e+08	1.30098e+09	4.46185e+08	7.70564e+08	4.43182e+08
TRUE		C45 H80 N5 O3 P	Full match	No results	No results	No match	0.58	769.6	770.608	13.429	18	0		No MS2	[M+H]+1	9.64772e+07	5.13228e+06	1.73972e+08	1.11106e+08	8.39585e+07	1.21153e+08	5.43244e+06	1.98815e+08	1.79066e+08	4.69652e+08	1.23333e+08	1.88056e+06	5.17002e+08	3.77129e+08	8.64727e+08	1.36936e+08	2.20659e+06	1.33164e+09	8.07534e+08	1.13153e+06	1.17919e+06	1.114e+06	1.17612e+08	1.9146e+07	4.84018e+07	1.75946e+08	9.39145e+07	9.09987e+07	1.74798e+08	2.38208e+08	1.4122e+08	3.1994e+06	2.91451e+08	3.00083e+08
TRUE	[Similar to: NP-021303; ΔMass: -366.1100 Da]	C8 H6	Full match	Invalid mass	No results	No results	3.33	102.047	103.055	1.479	0	1		DDA for preferred ion	[M+H]+1	3.99212e+08	6.56338e+08	8.13209e+08	3.64256e+08	4.28472e+08	3.72633e+08	2.46975e+08	6.06457e+08	6.13874e+08	2.96315e+08	7.95042e+07	2.15147e+08	7.3617e+07	2.00962e+08	1.92129e+08	1.8918e+08	1.40255e+08	2.29212e+08	1.13162e+08	2.25885e+06	2.22184e+06	2.06068e+06	6.29074e+07	7.17643e+07	7.42048e+07	7.47675e+07	6.88511e+07	7.74242e+07	7.72504e+07	3.30756e+08	1.3301e+09	2.09444e+08	1.2708e+09	5.52713e+08
TRUE		C47 H64 N10 O8	Full match	No results	No results	No results	0.44	896.491	897.499	10.612	0	0		No MS2	[M+H]+1	2.74068e+06	6.06976e+08	4.60942e+06	2.22153e+07	993106	2.7345e+06	1.80166e+07	3.82105e+08	6.65015e+08	547901	6.80308e+06	1.32973e+09	6.25402e+06	7.4159e+08	9.65971e+06	4.22756e+07	1.7651e+07	6.89021e+08	1.3732e+06	311416	300393	294481	3.08452e+07	3.67287e+07	3.04143e+07	3.29259e+07	3.3653e+07	4.17404e+07	4.76734e+07	3.60283e+07	5.07271e+08	1.44343e+06	755181	2.18442e+06
TRUE	Lidocaine	C14 H22 N2 O	Full match	Full match	No results	Full match	2.21	234.174	235.181	6.612	4	1	9.8	DDA for preferred ion	[M+H]+1	4.63776e+08	8.50243e+08	1.13077e+09	9.99579e+06	4.86118e+06	6.08476e+08	2.60066e+08	2.30188e+08	3.92129e+08	5.44165e+08	6.72925e+08	6.35575e+08	7.16787e+08	1.08405e+08	1.02922e+08	5.47331e+08	6.67586e+08	6.3738e+08	6.59854e+08	350085	529120	372998	2.03685e+07	2.30051e+07	2.19736e+07	2.23709e+07	2.26667e+07	2.79399e+07	9.35598e+06	1.10117e+08	6.25891e+08	1.49072e+08	1.09838e+09	8.7e+08
TRUE	3-hydroxyoctadecanoylcarnitine	C25 H49 N O5	Full match	No results	No results	Full match	1.84	443.362	444.369	9.866	2	0		DDA for preferred ion	[M+H]+1	3.06145e+08	8.5942e+08	2.90343e+08	1.73727e+08	1.64997e+08	8.3694e+07	1.1794e+08	2.46416e+08	2.59746e+08	2.46074e+08	2.74893e+07	5.7358e+06	1.39066e+07	4.84576e+06	3.76428e+06	5.43242e+06	7.89876e+06	4.54063e+06	1.05021e+07	147478	169965	165799	1.78603e+07	1.61396e+07	1.79251e+07	2.73464e+07	1.67716e+07	1.83658e+07	2.21284e+07	3.21009e+07	4.66284e+08	2.07958e+08	4.63646e+08	5.62899e+08
TRUE		C33 H58 N6 O7	Full match	No results	No results	No results	3.03	650.439	651.446	11.893	0	0		No MS2	[M+H]+1	6.94479e+06	4.84804e+06	1.04657e+07	1.50042e+06	1.31985e+06	4.84441e+06	2.86886e+06	1.40193e+06	1.26535e+06	1.49251e+06	1.01984e+07	6.86986e+06	2.33915e+07	1.39753e+06	5.39462e+06	9.37414e+07	2.47212e+06	2.60491e+06	6.48623e+06	947680	981681	932139	1.02835e+06	1.11447e+06	1.0574e+06	1.19563e+06	1.16907e+06	1.12578e+06	1.13975e+06	1.84586e+07	1.41556e+06	5.35338e+06	1.08674e+07	4.3702e+06
TRUE		C41 H64 O2 P2	Full match	No results	No results	No results	-1.44	650.437	651.445	11.691	0	0		No MS2	[M+H]+1	2.19492e+07	4.84804e+06	1.04657e+07	4.86343e+06	4.70697e+06	1.03536e+07	8.87638e+06	1.02841e+07	8.48212e+06	2.83245e+06	6.31321e+07	4.17709e+07	2.33915e+07	1.03288e+07	1.47071e+07	4.76765e+07	1.84744e+07	4.65404e+06	9.48438e+06	668889	715740	639000	857897	1.71307e+06	949654	1.09827e+06	934528	1.14374e+06	1.09282e+06	1.84586e+07	7.70387e+06	8.41973e+06	3.30617e+08	5.91013e+07
TRUE		C29 H66 N9 O4 P3	Full match	No results	No results	No results	3.39	697.447	698.455	11.052	0	0		No MS2	[M+H]+1	1.06263e+08	1.50368e+07	6.33544e+07	4.80608e+06	1.35027e+07	5.24727e+07	1.12726e+07	1.62638e+07	4.43521e+07	2.04822e+07	3.00536e+08	1.38444e+08	2.62745e+08	1.39718e+07	6.29622e+07	6.85443e+08	1.21708e+07	4.71898e+07	1.1457e+08	481293	521050	531068	1.30033e+07	1.74245e+07	1.52521e+07	8.27264e+06	1.53104e+07	1.38913e+07	1.7699e+07	6.8269e+07	3.44334e+07	1.52346e+08	3.68756e+07	1.20122e+08
TRUE	(2R)-2-[(5Z,8Z,11Z,14Z,17Z)-5,8,11,14,17-Icosapentaenoyloxy]-3-(stearoyloxy)propyl 2-(trimethylammonio)ethyl phosphate	C46 H82 N O8 P	No results	No results	No results	Full match	-1.54	807.577	808.584	13.345	55	0		No MS2	[M+H]+1	2.68086e+08	3.10767e+06	4.43937e+08	4.50746e+08	3.86402e+08	2.07674e+08	2.47988e+06	8.50822e+08	5.26574e+08	5.47149e+08	2.48083e+08	2.32091e+06	1.40665e+08	4.36345e+08	2.24727e+08	2.33948e+08	1.5974e+07	2.7558e+08	1.90092e+08	1.3637e+06	1.32478e+06	1.31545e+06	2.57772e+08	2.8067e+08	5.9579e+08	1.31904e+08	4.58088e+08	5.43347e+08	1.30929e+09	1.55796e+08	2.15495e+08	9.46968e+06	7.5638e+08	2.78696e+08
TRUE		C40 H83 N5 O7 P2	Full match	No results	No results	No match	-0.05	807.577	808.584	13.528	55	0		No MS2	[M+H]+1	2.68086e+08	3.30911e+06	4.72456e+08	4.80429e+08	4.06547e+08	2.6737e+08	3.40924e+06	8.50822e+08	5.26574e+08	5.47149e+08	2.48083e+08	2.60851e+06	1.40665e+08	4.36345e+08	2.24727e+08	2.33948e+08	1.5974e+07	2.87079e+08	1.90092e+08	1.36778e+06	1.49297e+06	1.41043e+06	2.57772e+08	2.8067e+08	5.9579e+08	1.31904e+08	4.58088e+08	5.43347e+08	1.30929e+09	1.55796e+08	2.35628e+08	9.46968e+06	6.86219e+08	2.78696e+08
TRUE		C60 H118 N10 O18 P2 S	Full match	No results	No results	No results	-0.26	1360.78	681.398	8.914	0	0		DDA for other ion	[M+2H]+2	8.07312e+07	1.07334e+08	4.02551e+06	8.18026e+06	8.34529e+06	1.71672e+07	4.69636e+06	1.40091e+07	7.04447e+06	2.84915e+07	3.48592e+08	1.18216e+08	1.05218e+07	6.47343e+07	1.19982e+07	5.12365e+08	1.0273e+07	1.59915e+07	2.93719e+07	2.33358e+06	2.92076e+06	2.79005e+06	4.46922e+07	4.71961e+07	4.79017e+07	3.24119e+07	6.18239e+07	4.5624e+07	3.7491e+07	4.5193e+06	1.31941e+07	8.94456e+06	2.31007e+08	7.6411e+08
TRUE		C32 H68 N6 O2 P2 S	Full match	No results	No results	No results	-0.29	662.46	663.467	11.07	0	0		No MS2	[M+H]+1	5.0297e+07	4.92231e+08	4.34061e+07	7.7074e+07	5.02518e+07	8.06926e+07	7.56017e+07	1.3058e+09	2.38078e+07	9.96184e+07	1.28834e+08	4.99258e+08	1.04416e+08	2.09811e+08	4.25991e+08	1.3432e+08	2.5367e+08	6.02786e+07	5.50393e+07	7.6289e+06	7.65496e+06	8.56924e+06	2.38514e+07	2.71405e+07	2.41578e+07	2.68881e+07	2.59946e+07	2.60751e+07	3.44116e+07	3.15718e+08	4.10227e+08	1.09796e+08	7.64665e+07	3.18875e+07
TRUE		C37 H78 N4 O3 P2	Full match	No results	No results	No match	-2.11	688.553	689.561	11.495	4	0		No MS2	[M+H]+1	1.43594e+06	1.82044e+08	1.07893e+09	3.28712e+08	2.1607e+08	1.21921e+06	2.19246e+08	2.56863e+08	4.6043e+08	4.97141e+08	1.51866e+06	1.0245e+09	8.82572e+08	1.30166e+09	6.00423e+08	1.40365e+06	7.99825e+08	9.48229e+08	4.35362e+08	918129	862764	851641	1.36943e+08	1.16616e+06	1.25341e+06	1.13827e+06	1.15768e+06	1.24346e+06	1.21808e+06	3.45172e+08	1.70144e+06	3.43577e+08	2.25952e+07	1.25646e+08
TRUE	7-OXOCHOLESTEROL	C27 H44 O2	Full match	No results	Partial match	Full match	2	400.335	401.342	13.245	58	0		No MS2	[M+H]+1	3.67052e+07	5.10253e+06	4.74791e+06	7.49911e+06	2.53823e+07	4.0203e+07	8.35932e+06	8.94793e+06	1.39505e+07	3.99878e+06	8.61554e+07	1.29455e+08	3.03713e+07	1.31069e+07	8.19376e+06	2.24277e+07	2.48535e+07	8.54526e+06	5.07806e+06	351060	647400	343714	2.769e+06	4.0773e+06	2.49068e+06	2.63428e+06	2.73769e+06	3.52653e+06	3.214e+06	2.74136e+07	2.10465e+07	4.35331e+06	3.66016e+08	1.03902e+08
TRUE		C45 H71 N2 O10 P	Full match	No results	No results	No results	-1.53	830.483	853.472	10.613	0	0		No MS2	[M+Na]+1	2.0708e+06	5.99873e+08	6.47689e+06	2.31603e+07	1.25772e+06	3.60145e+06	1.77499e+07	3.93207e+08	6.68314e+08	810214	6.30202e+06	1.29985e+09	8.03284e+06	7.67955e+08	1.18362e+07	4.52615e+07	1.81696e+07	7.51184e+08	1.56896e+06	328489	316862	310626	3.47676e+07	3.79245e+07	3.21815e+07	3.5072e+07	3.61951e+07	4.41368e+07	5.25086e+07	3.98723e+07	5.05182e+08	1.49969e+06	673925	3.33706e+06
TRUE		C48 H68 O13	Full match	No results	No results	No results	-1.03	852.465	853.472	10.615	0	0		No MS2	[M+H]+1	2.0708e+06	5.99873e+08	6.44042e+06	2.28302e+07	1.25772e+06	3.60145e+06	1.77499e+07	3.93207e+08	6.68314e+08	810214	6.30202e+06	1.29985e+09	8.03284e+06	7.67955e+08	1.18362e+07	4.52615e+07	1.81696e+07	7.51184e+08	1.56896e+06	290460	280178	274664	3.47676e+07	3.79245e+07	3.21815e+07	3.5072e+07	3.61951e+07	4.41368e+07	5.25086e+07	3.98723e+07	5.05182e+08	1.49969e+06	673925	3.33706e+06
TRUE		C47 H80 N5 O4 P	Full match	No results	No results	No match	-0.02	809.595	810.602	12.058	46	0		No MS2	[M+H]+1	2.17068e+08	1.04022e+07	5.84457e+08	3.16103e+08	2.32672e+08	1.14397e+08	8.24269e+06	1.29776e+09	4.43619e+08	4.3528e+08	2.30491e+08	1.22329e+07	1.16872e+08	1.8695e+08	1.86291e+08	1.15277e+08	6.70799e+06	2.26684e+08	1.03627e+08	429689	415608	445224	1.82563e+08	2.04468e+08	4.84263e+08	8.83605e+07	4.72913e+08	6.6636e+08	8.74872e+07	7.60079e+07	1.8334e+08	6.74707e+06	4.6547e+08	1.72232e+08
TRUE		C45 H84 N P3	Full match	No results	No results	No match	-1.46	731.581	810.602	12.066	14	0		No MS2	[M+DMSO+H]+1	2.17068e+08	7.61312e+06	5.84457e+08	3.16103e+08	2.32672e+08	1.14397e+08	8.24269e+06	1.29776e+09	4.43619e+08	4.3528e+08	2.30491e+08	1.22329e+07	1.16872e+08	1.8695e+08	1.86291e+08	1.15277e+08	8.8603e+06	2.26684e+08	1.03627e+08	350207	338731	362869	1.82563e+08	2.04468e+08	4.84263e+08	8.83605e+07	4.72913e+08	6.6636e+08	8.74872e+07	7.60079e+07	1.8334e+08	6.74707e+06	4.6547e+08	1.72232e+08
TRUE		C38 H82 N7 O3 P3	Full match	No results	No results	No match	-1.32	777.568	810.601	12.059	10	0		No MS2	[M+H+MeOH]+1	2.17068e+08	7.61312e+06	5.84457e+08	3.16103e+08	2.32672e+08	1.14397e+08	8.24269e+06	1.29776e+09	4.43619e+08	4.3528e+08	2.30491e+08	1.22329e+07	1.16872e+08	1.8695e+08	1.86291e+08	1.15277e+08	5.8222e+06	2.26684e+08	1.03627e+08	402774	389576	417336	1.82563e+08	2.04468e+08	4.84263e+08	8.83605e+07	4.72913e+08	6.6636e+08	8.74872e+07	7.60079e+07	1.8334e+08	6.74707e+06	4.6547e+08	1.72232e+08
TRUE		C41 H83 N3 O4 P2	Full match	No results	No results	No match	-1.44	743.585	744.592	12.552	17	0		No MS2	[M+H]+1	3.53737e+08	2.25234e+06	2.52094e+08	2.82806e+08	2.66492e+08	2.76097e+08	1.29423e+06	2.56931e+08	2.42676e+08	4.7378e+08	3.5953e+08	1.79554e+06	1.13959e+09	7.09698e+08	1.29152e+09	2.93541e+08	2.32451e+06	5.13198e+08	1.03516e+09	1.22198e+06	1.19208e+06	1.1948e+06	1.65474e+08	3.50004e+07	7.87677e+07	3.07022e+08	1.49211e+08	1.4052e+08	1.45533e+08	3.23221e+08	3.57595e+08	1.63827e+06	5.42343e+08	3.03333e+08
TRUE		C41 H79 N3 O7 P2	Full match	No results	No results	No match	-1.65	787.538	788.545	13.176	24	0		No MS2	[M+H]+1	2.7105e+07	1.86806e+07	3.10073e+07	9.54859e+06	2.22962e+07	4.46411e+07	3.0845e+07	1.99158e+07	3.52231e+07	4.55525e+06	7.60671e+07	2.36388e+08	9.33894e+07	3.44764e+07	3.55234e+06	5.29296e+07	4.87766e+07	5.7558e+06	4.91894e+07	657021	631832	689000	1.31596e+06	3.42691e+06	4.19007e+06	7.78909e+06	8.89189e+06	7.54616e+06	1.77234e+06	9.25234e+07	1.05506e+07	2.32943e+07	1.12889e+09	3.59891e+08
TRUE		C35 H63 N7 O13 P2	Full match	No results	No results	No results	-0.41	851.396	852.403	9.606	0	0		No MS2	[M+H]+1	1.01274e+09	8.4079e+08	9.84683e+08	1.10935e+09	5.59884e+08	1.13047e+09	1.07203e+09	9.354e+08	8.9381e+08	9.25522e+08	8.06477e+08	7.09488e+08	9.76344e+08	9.16515e+08	1.03054e+09	1.06275e+09	1.01241e+09	9.87817e+08	1.05506e+09	162890	146913	134039	1.02931e+09	7.48072e+08	9.6795e+08	7.97703e+08	8.86067e+08	9.10872e+08	9.02607e+08	1.14532e+09	1.04456e+09	9.74363e+08	8.00094e+08	1.22064e+09
TRUE	L-α-lysophosphatidylcholine	C22 H46 N O7 P	Full match	No results	No results	Full match	1.9	467.302	468.309	10.654	6	0		DDA for preferred ion	[M+H]+1	1.92861e+08	5.20275e+08	3.64961e+08	1.65354e+08	1.01133e+08	5.8503e+07	1.2061e+08	7.24317e+07	2.54647e+08	5.20944e+08	2.33553e+08	7.39225e+07	1.10995e+08	8.60527e+07	2.43182e+07	5.9191e+07	7.11899e+07	4.73308e+07	5.36976e+07	211723	217069	194111	1.61407e+07	1.56905e+07	1.68107e+07	1.48198e+07	1.58779e+07	1.84907e+07	1.74235e+07	1.01844e+07	6.3686e+08	2.68758e+08	4.53317e+08	4.89366e+08
TRUE	(4R,8S)-11-[(2R)-6-Hydroxy-2,7,8-trimethyl-3,4-dihydro-2H-chromen-2-yl]-4,8-dimethylundecanoic acid	C25 H40 O4	Full match	No results	No results	Full match	2.29	404.294	468.309	10.638	11	0		DDA for other ion	[M+ACN+Na]+1	1.92861e+08	1.1097e+08	3.64961e+08	1.65354e+08	1.01133e+08	1.78763e+07	1.2061e+08	7.24317e+07	2.54647e+08	5.20944e+08	2.33553e+08	7.39225e+07	1.10995e+08	8.60527e+07	2.43182e+07	5.9191e+07	7.11899e+07	4.73308e+07	5.36976e+07	257475	258172	243473	1.61407e+07	1.56905e+07	1.68107e+07	1.48198e+07	1.58779e+07	1.84907e+07	1.74235e+07	2.64223e+08	6.3686e+08	2.68758e+08	4.53317e+08	4.89366e+08
TRUE		C40 H83 N5 O7 P2	Full match	No results	No results	No match	0.59	807.577	808.584	14.058	55	0		No MS2	[M+H]+1	3.78832e+08	1.48484e+08	3.70526e+08	1.27095e+08	2.97714e+08	3.36882e+08	1.38117e+08	6.7523e+08	4.61367e+08	6.39484e+08	5.23626e+08	5.03633e+07	4.67132e+08	6.80173e+08	8.01156e+08	4.56118e+08	4.21185e+07	7.51233e+08	5.72731e+08	1.6764e+06	1.29309e+06	1.18468e+06	5.08655e+08	2.20015e+08	4.81923e+08	1.08983e+09	1.03457e+09	1.27485e+09	1.08776e+08	4.62522e+08	4.46337e+08	8.01291e+07	5.23269e+08	3.99501e+08
TRUE		C44 H83 N7 P2	Full match	No results	No results	No match	-0.69	771.618	794.607	12.557	15	0		No MS2	[M+Na]+1	1.58288e+08	3.70437e+07	2.92698e+08	2.03349e+08	2.99234e+08	1.44613e+08	1.14273e+07	2.52757e+06	3.52679e+08	8.12349e+06	1.5564e+08	1.4724e+07	2.67832e+08	4.5885e+08	2.32734e+08	3.75265e+08	5.92867e+06	4.52962e+08	2.84933e+08	1.20564e+06	1.17614e+06	1.17882e+06	8.48074e+07	1.31707e+08	2.35123e+08	1.64003e+08	5.55377e+08	4.41971e+08	6.48744e+08	2.17548e+08	2.98944e+08	1.79817e+07	9.79042e+08	3.53512e+08
TRUE	1-Stearoyl-2-arachidonoylplasmenylcholine	C46 H84 N O7 P	Full match	No results	No results	Full match	0.61	793.599	794.606	12.52	21	0		No MS2	[M+H]+1	1.20502e+08	1.33745e+07	2.15903e+08	2.2207e+08	2.08045e+08	6.93942e+07	5.83257e+06	6.69505e+06	2.4945e+08	8.12349e+06	1.81504e+08	4.17636e+06	2.33646e+08	4.14599e+08	1.48247e+08	2.4572e+08	5.92867e+06	5.29539e+08	2.28608e+08	564084	408147	551537	9.71449e+07	1.70806e+08	1.93414e+07	1.77608e+08	3.72587e+08	2.81987e+08	1.54358e+08	1.57159e+08	3.26343e+08	4.87056e+06	9.79042e+08	2.6518e+08
TRUE	[Similar to: (2E)-3-phenyl-N-(2-phenylethyl)prop-2-enamide; ΔMass: 38.1313 Da]	C16 H35 N O3	Full match	Invalid mass	No results	No results	2.04	289.262	290.27	9.134	0	1		DDA for preferred ion	[M+H]+1	6.5508e+06	1.31948e+07	1.2264e+07	1.46345e+07	1.31987e+07	1.49143e+07	4.41994e+06	9.19698e+06	2.75026e+07	1.42336e+07	7.48787e+06	2.70763e+07	1.54764e+07	5.65063e+06	1.04871e+07	6.76197e+06	1.48822e+07	7.67202e+06	1.12104e+07	1.08646e+07	1.00446e+07	8.59627e+06	1.0936e+07	1.08333e+07	1.06617e+07	1.35982e+06	1.08819e+07	1.19305e+07	1.28332e+07	1.73812e+08	3.6711e+07	1.6617e+07	6.68899e+08	1.93918e+08
TRUE	1-[(9Z)-octadecenoyl]-2-tetradecanoyl-sn-glycero-3-phosphocholine	C40 H78 N O8 P	Full match	No results	No results	Full match	2.44	731.548	732.556	13.446	49	0		No MS2	[M+H]+1	1.1383e+06	1.0164e+07	3.71232e+08	9.04204e+06	1.00703e+07	1.02628e+06	4.26737e+06	1.48369e+07	3.15773e+06	1.64891e+07	3.31251e+06	3.5394e+06	1.15862e+07	8.08215e+06	7.7271e+06	1.69252e+06	2.52547e+06	9.72374e+06	1.00777e+07	874665	849704	808531	1.06909e+07	990062	5.07131e+06	935589	840421	1.06646e+06	2.64264e+06	1.02069e+07	1.84544e+06	8.53307e+07	5.13862e+06	3.43164e+07
TRUE		C40 H79 N10 O5 P	Full match	No results	No results	No results	-1.02	810.596	811.604	13.416	0	0		No MS2	[M+H]+1	5.75023e+08	1.04017e+08	5.6057e+08	1.70812e+07	7.29135e+08	3.69035e+08	7.14353e+07	1.25712e+09	7.24589e+08	8.52458e+08	6.36123e+08	7.48124e+07	3.00153e+08	6.49465e+08	5.19446e+08	9.76044e+08	9.15377e+07	5.91294e+08	4.13972e+08	1.82346e+06	1.90026e+06	1.7952e+06	3.99762e+08	6.5324e+08	6.4675e+08	7.84701e+08	1.10421e+09	1.22175e+09	6.58941e+08	6.58098e+08	9.14576e+08	1.09725e+08	1.08324e+09	4.55876e+08
TRUE		C51 H99 N8 O14 P3	Full match	No results	No results	No results	0.61	1140.65	571.332	8.839	0	0		DDA for other ion	[M+2H]+2	5.3634e+07	4.91988e+07	1.0539e+07	1.43018e+07	8.4934e+06	4.44506e+07	1.22689e+07	1.74583e+07	1.58774e+07	2.01191e+07	2.47204e+08	1.05367e+08	3.39004e+07	5.03336e+07	1.51392e+07	2.29915e+08	1.55127e+07	2.6211e+07	3.73719e+07	8.06769e+06	8.1588e+06	1.03303e+07	3.20967e+07	4.49647e+07	3.6148e+07	3.53953e+07	3.34745e+07	3.62599e+07	3.51673e+07	1.35838e+07	1.74039e+07	1.3834e+07	1.26589e+08	3.5725e+08
TRUE		C32 H57 Br O S	Full match	No results	No results	No results	-1.94	568.33	569.338	8.841	0	0		No MS2	[M+H]+1	5.3634e+07	4.91988e+07	1.0539e+07	1.43018e+07	8.4934e+06	4.44506e+07	1.22689e+07	1.74583e+07	1.58774e+07	2.01191e+07	2.47204e+08	1.05367e+08	3.39004e+07	5.03336e+07	1.51392e+07	2.29915e+08	1.55127e+07	2.6211e+07	3.73719e+07	8.06769e+06	7.66021e+06	1.03303e+07	3.20967e+07	4.49647e+07	3.6148e+07	3.53953e+07	3.34745e+07	3.62599e+07	3.51673e+07	1.35838e+07	1.74039e+07	1.3834e+07	1.26589e+08	3.5725e+08
TRUE	Platelet-activating factor	C26 H54 N O7 P	Full match	No results	No results	Full match	1.96	523.365	524.372	11.824	4	0		DDA for preferred ion	[M+H]+1	4.83595e+08	1.25372e+09	7.41036e+08	2.72301e+08	1.82792e+08	2.09557e+08	1.76803e+08	3.68299e+08	2.79432e+08	4.93556e+08	2.74069e+08	2.40883e+08	2.34221e+08	1.83989e+08	6.11301e+07	1.29781e+08	2.50926e+08	7.40894e+07	1.01031e+08	440096	372207	399507	2.76954e+07	2.87328e+07	2.82656e+07	2.67841e+07	2.68196e+07	3.4561e+07	2.65337e+07	4.53157e+08	9.92072e+08	4.4471e+08	1.03952e+09	1.1094e+09
TRUE	Allylacetic acid	C5 H8 O2	Full match	No results	No results	Full match	3.38	100.053	118.087	1.024	22	0		DDA for preferred ion	[M+NH4]+1	4.36585e+08	3.87567e+08	4.60638e+08	2.7516e+08	2.99512e+08	3.06721e+08	2.15335e+08	4.047e+08	2.74336e+08	4.75924e+08	1.39328e+08	2.61607e+08	9.36032e+07	1.00685e+08	9.96691e+07	7.00303e+07	9.39885e+07	1.23091e+08	1.23126e+08	906462	815124	665775	9.01542e+07	8.83277e+07	1.0481e+08	1.0181e+08	1.00145e+08	9.8309e+07	1.04042e+08	1.87761e+08	3.79447e+08	3.1507e+08	4.19752e+08	5.38798e+08
TRUE		C41 H83 N3 O4 P2	Full match	No results	No results	No match	-1.23	743.585	744.592	12.351	17	0		No MS2	[M+H]+1	2.25208e+08	1.76433e+06	1.47206e+07	4.04358e+07	2.11739e+08	1.18159e+08	1.87272e+06	2.5111e+08	1.92939e+08	4.04936e+08	2.02604e+08	2.53057e+06	1.10528e+09	7.43531e+08	1.24831e+09	3.42004e+08	2.32451e+06	5.81605e+08	1.08821e+09	990818	939782	941181	1.43551e+08	7.07112e+06	1.45944e+07	2.51359e+08	1.0558e+08	9.11722e+06	2.36359e+08	3.00366e+08	2.77108e+08	2.07041e+06	6.18034e+08	2.7841e+08
TRUE	(2S)-1-{[11-(3,4-Dimethyl-5-propyl-2-furyl)undecanoyl]oxy}-3-hydroxy-2-propanyl 13-(3-methyl-5-pentyl-2-furyl)tridecanoate	C46 H78 O7	No results	No results	No results	Full match	-3.7	742.572	743.579	12.278	9	0		No MS2	[M+H]+1	1.33925e+07	1.76433e+06	4.54704e+06	4.04358e+07	2.44724e+07	1.02041e+07	860369	4.13758e+07	3.01539e+07	2.83853e+07	1.31295e+07	2.31911e+06	6.66863e+07	7.43531e+08	1.24831e+09	3.3886e+08	1.01042e+06	5.81605e+08	1.08821e+09	426623	361835	432400	4.32707e+06	7.07112e+06	1.45944e+07	3.06709e+08	2.04043e+07	9.11722e+06	2.36359e+08	2.59738e+07	1.95865e+07	951194	6.18034e+08	2.53422e+07
TRUE	(11Z,14Z)-eicosadienoylcarnitine	C27 H49 N O4	Full match	No results	No results	Full match	1.87	451.367	452.374	9.966	1	0		DDA for preferred ion	[M+H]+1	1.24369e+09	1.8867e+08	3.17693e+08	9.69331e+07	1.59449e+08	1.11234e+08	1.34097e+08	1.32165e+08	1.84636e+08	1.43991e+08	1.8898e+08	2.10165e+07	8.74821e+07	1.21938e+07	9.10537e+06	5.86643e+06	2.39865e+07	7.15512e+06	1.02744e+07	213014	194128	247007	1.67319e+07	1.55184e+07	1.5659e+07	1.68278e+07	1.51547e+07	1.57391e+07	1.74461e+07	1.3787e+08	2.57641e+08	4.91577e+08	4.13566e+08	6.73546e+08
TRUE		C23 H43 N O4 P2	Full match	No results	No results	No results	2.85	459.268	941.525	10.62	0	0		No MS2	[2M+Na]+1	1.77184e+06	5.5148e+08	5.2095e+06	1.85958e+07	1.52152e+06	2.00158e+06	1.42933e+07	3.33315e+08	5.95013e+08	630030	5.37464e+06	1.24308e+09	7.3996e+06	6.42626e+08	8.62047e+06	3.44963e+07	1.7422e+07	6.04791e+08	1.36866e+06	315280	316133	298135	2.84137e+07	2.83731e+07	2.57795e+07	2.89895e+07	2.64584e+07	3.41412e+07	4.05536e+07	2.98283e+07	4.98994e+08	1.55802e+06	830536	1.6766e+06
TRUE		C7 H16 N2	Full match	No results	No results	No results	2.29	128.132	146.165	0.801	0	0		DDA for preferred ion	[M+NH4]+1	1.23498e+09	1.19712e+09	8.88119e+08	2.7138e+07	3.7441e+07	6.46488e+07	1.82573e+08	3.42724e+08	1.46295e+08	1.05086e+08	1.70692e+08	1.88227e+08	1.44395e+08	1.2816e+08	1.35852e+08	8.1647e+07	7.05196e+07	6.24854e+06	1.02395e+08	79351.8	81031.9	64897.4	2.75251e+07	3.10929e+07	2.70014e+07	2.75844e+07	2.54338e+07	3.06466e+07	2.58137e+07	3.91549e+08	8.63649e+08	7.82139e+08	3.35666e+08	4.52719e+08
TRUE	Spermidine	C7 H19 N3	Full match	Full match	Full match	Full match	2.66	145.158	146.166	0.786	1	1	68	DDA for preferred ion	[M+H]+1	1.23498e+09	1.19712e+09	8.88119e+08	2.7138e+07	3.7441e+07	6.46488e+07	1.82573e+08	3.42724e+08	1.46295e+08	1.05086e+08	1.70692e+08	1.88227e+08	1.44395e+08	1.2816e+08	1.35852e+08	8.1647e+07	7.05196e+07	6.24854e+06	1.02395e+08	87697.2	89554.1	71722.7	2.75251e+07	3.10929e+07	2.70014e+07	2.75844e+07	2.54338e+07	3.06466e+07	2.58137e+07	3.91549e+08	8.63649e+08	7.82139e+08	3.35666e+08	4.52719e+08
TRUE		C29 H52 N5 O3 P	Full match	No results	No results	No match	-0.27	549.381	550.388	12.248	6	0		No MS2	[M+H]+1	3.45922e+08	2.50386e+08	3.38493e+08	1.77728e+08	7.95271e+07	7.97839e+07	1.4173e+08	2.28993e+08	1.16092e+08	2.12173e+08	5.93514e+07	9.73751e+07	9.13472e+07	8.08564e+07	1.05e+07	4.90038e+07	7.97549e+07	3.28347e+07	2.40315e+07	343799	314985	376703	1.21461e+07	1.40302e+07	8.92123e+06	1.33037e+07	1.46123e+07	1.38913e+07	1.1513e+07	1.76537e+08	1.23285e+09	1.69762e+08	6.38064e+08	4.66699e+08
TRUE		C26 H53 N3 O3 P2	Full match	No results	No results	No results	-4.3	517.354	550.388	12.23	0	0		No MS2	[M+H+MeOH]+1	3.45922e+08	2.50386e+08	3.38493e+08	1.77728e+08	7.95271e+07	7.97839e+07	1.4173e+08	2.28993e+08	1.16092e+08	2.12173e+08	5.93514e+07	9.73751e+07	9.13472e+07	8.08564e+07	1.05e+07	4.90038e+07	7.97549e+07	3.28347e+07	2.40315e+07	380553	342023	389152	1.21461e+07	1.40302e+07	8.92123e+06	1.33037e+07	1.46123e+07	1.38913e+07	1.1513e+07	1.76537e+08	1.23285e+09	1.69762e+08	6.38064e+08	4.66699e+08
TRUE		C10 H20 O5	Full match	No results	No results	No match	2.35	220.132	221.139	8.902	1	0		No MS2	[M+H]+1	1.96126e+07	1.46016e+07	2.44931e+06	878092	1.60082e+06	2.2128e+06	841899	6.48895e+06	1.04522e+06	2.33243e+06	6.9253e+07	2.39173e+07	3.63777e+06	1.85966e+07	3.74561e+06	1.42104e+08	1.30518e+06	1.74226e+06	9.20586e+06	991080	1.68475e+06	747902	9.13278e+06	1.01144e+07	9.60328e+06	7.74656e+06	8.61803e+06	1.0399e+07	1.08032e+07	1.30234e+06	2.52241e+06	8.47626e+06	4.46525e+07	1.66636e+08
TRUE		C38 H84 N8 O6 P2	Full match	No results	No results	No results	-0.88	810.598	811.605	13.986	0	0		No MS2	[M+H]+1	6.87713e+07	7.4917e+06	4.8534e+07	3.81885e+07	8.43885e+07	8.79602e+08	8.05001e+06	1.24872e+08	6.70231e+07	6.17957e+07	7.90436e+07	5.4471e+06	2.25016e+07	2.92494e+07	2.39773e+07	1.67181e+07	5.02162e+06	1.81504e+07	1.42435e+07	1.36458e+06	1.05256e+06	964323	2.45144e+07	1.20034e+09	1.22894e+09	1.92145e+07	2.97946e+07	6.65027e+07	5.45575e+06	3.63912e+07	3.2001e+07	4.51002e+06	3.9473e+07	1.73883e+07
TRUE		C19 H32 O5 S	Full match	No results	No results	No results	-0.13	372.197	371.19	9.972	0	0		DDA for preferred ion	[M-H]-1	3.21649e+06	117832	859190	2.18354e+06	1.22497e+09	109407	152124	306196	9.00908e+06	845949	2.28862e+06	549367	686057	3.82411e+06	1.2015e+06	386591	123055	2.09553e+06	1.03996e+06	63350.3	71569.6	61506.6	4.42961e+06	4.38615e+06	4.23495e+06	4.15345e+06	4.21389e+06	4.34848e+06	4.83716e+06	1.7811e+06	1.27754e+07	1.06099e+06	3.78942e+06	3.30258e+06
TRUE	Arachidonoyl PAF C-16	C44 H82 N O7 P	No results	No results	No results	Full match	1.8	767.584	768.591	12.056	20	0		No MS2	[M+H]+1	1.51262e+08	2.57634e+07	4.59062e+08	3.42164e+08	4.99875e+08	2.68486e+07	2.83853e+07	5.21346e+08	2.03691e+08	3.11208e+08	1.34863e+08	1.59079e+07	1.21967e+09	1.04799e+09	8.3084e+08	2.73811e+08	1.00911e+07	1.17015e+09	8.55133e+08	474908	459346	492079	2.26641e+08	7.92332e+07	1.98599e+08	5.28415e+08	4.65711e+08	4.54718e+08	1.74054e+08	6.24823e+08	2.53336e+08	2.34734e+07	5.31783e+08	4.28193e+08
TRUE		C25 H51 N3 O4 P2	Full match	No results	No results	No match	-3.71	519.334	520.341	10.853	3	0		DDA for preferred ion	[M+H]+1	5.73212e+08	5.13075e+08	4.61358e+08	2.6524e+08	1.14888e+08	2.45632e+08	1.99671e+08	6.45675e+08	2.10215e+08	3.34896e+08	1.19702e+09	3.15921e+08	6.15173e+08	4.86084e+08	3.0048e+08	2.58459e+08	5.91681e+08	2.92601e+08	3.6e+08	279355	347099	307476	9.63026e+07	9.19559e+07	7.56522e+07	7.72618e+07	8.09821e+07	9.70808e+07	7.39107e+07	5.79066e+08	6.38488e+08	9.10001e+08	6.53147e+08	4.87748e+08
TRUE		C17 H43 N9 O9	Full match	No results	No results	No match	1.95	517.319	518.327	10.848	2	0		No MS2	[M+H]+1	5.73212e+08	5.13075e+08	4.61358e+08	2.6524e+08	1.14888e+08	2.45632e+08	1.99671e+08	6.45675e+08	2.10215e+08	3.34896e+08	1.19702e+09	3.15921e+08	6.15173e+08	4.86084e+08	3.0048e+08	2.58459e+08	5.91681e+08	2.92601e+08	3.6e+08	237338	294892	261229	9.63026e+07	9.19559e+07	7.56522e+07	7.72618e+07	8.09821e+07	9.70808e+07	7.39107e+07	5.79066e+08	6.38488e+08	9.10001e+08	6.53147e+08	4.87748e+08
TRUE		C33 H80 N9 O5 P3	Full match	No results	No results	No match	0.98	775.55	808.584	12.978	10	0		No MS2	[M+H+MeOH]+1	9.88815e+06	1.46254e+06	1.49384e+07	2.41455e+07	2.46414e+07	2.94507e+06	485034	4.2069e+07	1.83132e+07	1.80546e+07	1.40221e+07	1.85743e+06	8.30546e+06	6.03812e+07	2.04931e+07	6.9343e+07	1.98095e+06	3.52906e+07	470068	350288	370204	368074	2.53315e+07	1.88269e+07	1.02126e+07	2.61416e+07	6.40258e+07	4.55538e+07	2.03591e+08	1.79647e+07	3.78081e+07	1.65012e+06	3.00329e+08	555289
TRUE		C37 H79 N9 O3 P2	Full match	No results	No results	No match	1.48	759.579	760.586	11.729	52	0		No MS2	[M+H]+1	2.93379e+07	9.62927e+06	1.5826e+07	1.0551e+09	3.25802e+07	3.34258e+07	5.72103e+06	1.01573e+07	3.36278e+07	2.73852e+07	6.55941e+07	7.7406e+06	9.26483e+06	2.58604e+07	1.73304e+07	5.78084e+07	1.21386e+07	5.11292e+06	8.68779e+06	969556	933786	927833	2.37011e+07	1.92107e+07	3.44289e+07	4.21074e+06	5.98831e+06	9.05386e+06	6.06665e+08	1.00075e+07	1.03705e+08	6.98335e+06	7.21394e+07	1.59557e+07
TRUE		C18 H46 N10 O4 P2	Full match	No results	No results	No results	-4.2	528.316	265.165	8.961	0	0		No MS2	[M+2H]+2	9.50575e+06	1.63719e+07	1.28152e+06	1.25598e+06	1.18411e+06	4.58705e+06	1.07583e+06	2.76396e+06	1.28801e+06	2.52303e+06	6.06427e+07	2.53537e+07	1.87087e+06	1.07135e+07	3.50379e+06	1.09713e+08	1.52591e+06	3.06217e+06	5.7187e+06	750814	761102	1.13941e+06	6.43383e+06	7.01472e+06	6.83e+06	4.38674e+06	7.45328e+06	1.00859e+07	9.01717e+06	955135	3.18815e+06	904172	3.75437e+07	1.22653e+08
TRUE	Cafestol	C20 H28 O3	Not the top hit	Full match	Partial match	Partial match	-4.77	316.202	317.21	10.316	70	10	55.4	DDA for preferred ion	[M+H]+1	9.14038e+07	2.72372e+07	4.696e+07	3.08678e+07	3.39555e+07	3.13854e+07	4.43821e+07	6.77149e+07	4.05318e+07	3.44778e+07	1.00712e+08	1.73082e+08	1.47276e+08	5.38192e+07	1.39146e+08	5.9092e+07	8.66684e+07	8.84555e+07	7.48572e+07	1.37781e+06	5.15e+06	5.79201e+06	6.04941e+06	7.58703e+06	6.47459e+06	4.62719e+06	6.53647e+06	6.62442e+06	7.16748e+06	5.64935e+07	6.60641e+07	5.46815e+07	1.14192e+09	2.00776e+08
TRUE		C51 H66 N4 O7	Full match	No results	No results	No results	0.44	846.494	869.483	11.165	0	0		DDA for other ion	[M+Na]+1	560937	2.42999e+08	1.39825e+06	5.00094e+06	515900	2.29741e+06	9.42526e+06	1.51631e+08	5.39348e+08	552630	1.14374e+06	1.20551e+09	3.69068e+06	6.06278e+08	5.56374e+06	2.05295e+07	1.12217e+07	6.587e+08	890916	364428	377464	344091	2.07045e+07	2.22643e+07	2.19524e+07	2.09804e+07	2.00126e+07	2.37099e+07	2.23961e+07	2.6669e+07	3.1154e+08	618232	647409	801202
TRUE		C49 H60 N10 O5	Full match	No results	No results	No match	0.52	868.475	869.483	11.161	2	0		DDA for preferred ion	[M+H]+1	524283	2.42999e+08	1.39825e+06	5.00094e+06	482188	2.29741e+06	9.42526e+06	1.51631e+08	5.39348e+08	552630	1.14374e+06	1.20551e+09	3.69068e+06	6.06278e+08	5.56374e+06	2.05295e+07	1.12217e+07	6.587e+08	890916	280787	352798	321607	2.07045e+07	2.22643e+07	2.19524e+07	2.09804e+07	2.00126e+07	2.37099e+07	2.23961e+07	2.6669e+07	3.1154e+08	577834	604987	801202
TRUE		C74 H127 N6 O14 P3 S	Full match	No results	No results	No results	-0.16	1448.83	725.424	8.927	0	0		No MS2	[M+2H]+2	5.29279e+07	8.32214e+07	2.17884e+06	3.9083e+06	5.0445e+06	1.32198e+07	4.24801e+06	1.25743e+07	6.03196e+06	1.52847e+07	2.86213e+08	1.08452e+08	6.66628e+06	5.99398e+07	8.81288e+06	4.47299e+08	8.24562e+06	1.43646e+07	2.41884e+07	1.33901e+06	895132	1.59742e+06	3.15446e+07	3.009e+07	3.28123e+07	1.62435e+07	2.95229e+07	2.85826e+07	2.59178e+07	3.9592e+06	1.01299e+07	6.20934e+06	1.94648e+08	5.43443e+08
TRUE	N-[(2S,3R,4E)-1-{[β-D-Galactopyranosyl-(1->3)-2-acetamido-2-deoxy-β-D-galactopyranosyl-(1->3)-α-D-galactopyranosyl-(1->4)-β-D-galactopyranosyl-(1->4)-β-D-glucopyranosyl]oxy}-3-hydroxy- 4-octadecen-2-yl]icosanamide	C70 H128 N2 O28	No results	No results	No results	Full match	-0.37	1444.86	723.44	8.97	14	0		No MS2	[M+2H]+2	5.29279e+07	8.32214e+07	2.17884e+06	3.9083e+06	5.0445e+06	1.32198e+07	4.83504e+06	1.25743e+07	6.39467e+06	1.52847e+07	4.9975e+07	1.08452e+08	6.66628e+06	5.99398e+07	8.81288e+06	4.47299e+08	4.05211e+07	1.43646e+07	2.41884e+07	1.46251e+06	962234	1.59742e+06	3.15446e+07	3.009e+07	3.28123e+07	1.62435e+07	2.95229e+07	2.85826e+07	2.59178e+07	3.9592e+06	1.01299e+07	6.20934e+06	1.94648e+08	5.43443e+08
TRUE		C31 H61 N6 O11 P	Full match	No results	No results	No match	4.19	724.417	725.424	8.781	3	0		No MS2	[M+H]+1	5.29279e+07	8.32214e+07	2.17884e+06	4.08017e+06	5.0445e+06	1.32198e+07	2.21149e+06	1.25743e+07	6.39467e+06	1.54153e+07	2.86213e+08	1.08452e+08	1.80364e+06	5.99398e+07	8.81288e+06	4.47299e+08	3.22755e+07	1.43646e+07	2.41884e+07	1.46251e+06	962234	397929	3.15446e+07	3.009e+07	3.28123e+07	1.62435e+07	2.95229e+07	2.85826e+07	2.59178e+07	3.9592e+06	1.01299e+07	3.53286e+06	1.94648e+08	5.43443e+08
TRUE	11-Aminoundecanoic acid	C11 H23 N O2	Full match	No results	No results	Full match	2.21	201.173	202.181	1.036	1	0		No MS2	[M+H]+1	4.90026e+08	2.44012e+08	2.01161e+08	6.22673e+08	4.75983e+08	2.6512e+08	1.19664e+09	2.95084e+08	2.06642e+08	1.58436e+08	5.04119e+08	9.42654e+08	8.8314e+08	3.09545e+08	6.93835e+08	3.47808e+08	4.00886e+08	5.81889e+08	4.38128e+08	384255	830691	511586	1.25128e+08	1.19654e+08	1.50319e+08	1.43123e+08	1.55609e+08	1.50873e+08	1.36363e+08	6.81188e+08	1.79024e+08	6.41344e+08	4.47377e+08	2.52033e+08
TRUE		C15 H24 O S	Full match	No results	No results	No results	0.26	252.155	311.169	14.616	0	0		DDA for other ion	[M-H+HAc]-1	2.7441e+08	4.13919e+07	2.92035e+07	3.33704e+07	2.42963e+07	3.18711e+08	2.49421e+07	1.96442e+07	1.6623e+07	1.10997e+07	5.56466e+07	1.40456e+08	1.96144e+08	6.03217e+07	4.49981e+07	4.24426e+08	1.91461e+08	1.45981e+08	1.39422e+08	2.61476e+07	2.91809e+07	2.59649e+07	4.81631e+07	1.1327e+08	1.58048e+07	1.03555e+08	9.95168e+07	1.14081e+08	1.07504e+08	1.51386e+08	1.01997e+09	1.56649e+08	1.96355e+08	1.69239e+08
TRUE		C22 H46 N7 O4 P	Full match	No results	No results	No results	2.92	503.336	504.344	11.835	0	0		DDA for preferred ion	[M+H]+1	3.13701e+08	2.34053e+08	5.33918e+08	1.11027e+08	4.3674e+07	8.04414e+07	8.44502e+07	9.69032e+07	1.23781e+08	2.19153e+08	3.14534e+08	1.0742e+08	1.24448e+08	7.84285e+07	2.04425e+07	8.81222e+07	2.12119e+08	5.41448e+07	4.85804e+07	452964	383090	421450	1.81664e+07	1.95222e+07	1.86806e+07	1.85229e+07	2.05022e+07	2.12942e+07	1.99054e+07	5.80209e+07	4.55956e+08	1.69945e+08	1.50742e+08	1.91044e+08
TRUE	3-hydroxytetradecanoylcarnitine	C21 H41 N O5	Full match	No results	No results	Full match	1.74	387.299	388.306	9.309	2	0		DDA for preferred ion	[M+H]+1	8.5474e+07	3.72069e+08	1.41533e+08	5.62509e+07	1.18377e+09	5.525e+07	4.48998e+07	1.50583e+08	1.53368e+08	1.64851e+08	1.0152e+07	2.59065e+07	6.59832e+06	1.0128e+07	1.73205e+06	4.33868e+06	4.45716e+06	1.93766e+06	9.85194e+06	202341	158110	145790	9.55829e+06	8.82048e+06	1.03445e+07	1.03263e+07	1.27908e+07	9.94358e+06	1.26272e+07	3.01501e+07	2.6598e+08	1.35373e+08	3.08737e+08	3.40842e+08
TRUE		C55 H77 N2 O2 P3	Full match	No results	No results	No results	0.15	890.52	913.509	11.158	0	0		No MS2	[M+Na]+1	555746	2.67e+08	2.16932e+06	6.30844e+06	511125	2.19447e+06	1.0971e+07	1.59073e+08	5.37996e+08	508410	1.96832e+06	1.18141e+09	3.3604e+06	5.5822e+08	6.6763e+06	2.09952e+07	1.14172e+07	6.26646e+08	1.1282e+06	297637	373970	340907	2.1393e+07	2.71775e+07	2.46533e+07	2.29211e+07	2.36685e+07	2.40616e+07	2.41884e+07	2.58215e+07	3.50797e+08	612510	656693	1.8009e+06
TRUE		C53 H71 N8 P3	Full match	No results	No results	No results	-0.03	912.501	913.509	11.157	0	0		No MS2	[M+H]+1	535664	2.67e+08	2.17e+06	6.30844e+06	502768	2.19447e+06	1.0971e+07	1.59073e+08	5.37996e+08	490039	1.96919e+06	1.18141e+09	3.3615e+06	5.5822e+08	6.6763e+06	2.09952e+07	1.14172e+07	6.26646e+08	1.12875e+06	286882	360457	328588	2.1393e+07	2.71775e+07	2.46533e+07	2.29211e+07	2.36685e+07	2.40616e+07	2.41884e+07	2.58215e+07	3.50797e+08	590377	656693	1.80154e+06
TRUE		C44 H67 N4 O4 P3	Full match	No results	No results	No match	2.06	808.439	809.446	10.611	1	0		No MS2	[M+H]+1	1.73788e+06	5.39561e+08	5.47244e+06	1.82956e+07	440235	3.12151e+06	1.6593e+07	3.56769e+08	6.04797e+08	541402	5.30263e+06	1.17942e+09	7.12136e+06	7.90558e+08	9.92246e+06	4.22548e+07	1.84905e+07	7.40053e+08	1.47927e+06	325069	313563	307392	3.4082e+07	3.74556e+07	3.17353e+07	3.17625e+07	3.28288e+07	3.82578e+07	4.95224e+07	4.17292e+07	4.28624e+08	1.2457e+06	625404	2.80308e+06
TRUE		C30 H59 N9 O4 P2	Full match	No results	No results	No results	-0.28	671.416	672.424	11.714	0	0		No MS2	[M+H]+1	3.00962e+06	1.48934e+06	1.66149e+06	1.1894e+06	4.18095e+06	3.28629e+06	825757	1.36073e+06	1.21001e+06	1.64974e+06	3.55733e+07	1.19264e+07	1.24662e+07	5.10274e+06	1.72255e+06	1.23397e+06	1.37748e+06	1.61249e+06	1.39793e+06	589789	631100	627076	756446	745586	681811	760071	780301	668927	825663	1.24998e+07	9.47245e+06	1.41121e+06	1.27717e+08	1.47417e+08
TRUE		C34 H80 N8 O5 P2	Full match	No results	No results	No match	-0.75	742.572	743.579	11.386	9	0		No MS2	[M+H]+1	2.0184e+07	2.2722e+06	2.24836e+07	2.11321e+06	4.85988e+06	1.46553e+06	1.49202e+06	1.90918e+06	4.56026e+06	1.9915e+07	5.12241e+06	1.91974e+06	9.10953e+08	6.89637e+08	9.99773e+08	1.82434e+08	1.92672e+06	1.16928e+09	5.95351e+08	948742	959121	889462	9.55953e+07	1.74412e+06	2.58715e+06	6.89121e+08	1.14717e+08	6.34983e+06	3.46867e+07	7.37114e+08	3.43861e+07	1.79542e+06	2.09165e+07	1.74825e+07
TRUE	Androsterone sulfate	C19 H30 O5 S	Full match	No results	No results	Full match	0.12	370.181	369.174	9.822	4	0		DDA for preferred ion	[M-H]-1	1.82627e+07	419975	5.89011e+06	9.95559e+06	1.16369e+09	1.12443e+06	626881	2.03157e+06	2.5253e+07	5.25535e+06	1.12448e+07	1.18973e+06	3.07946e+06	2.39365e+07	3.98802e+06	1.77984e+06	709927	8.12193e+06	4.36914e+06	74438.6	63715	64571.5	6.00302e+06	5.01682e+06	5.33696e+06	5.89372e+06	5.83809e+06	5.85492e+06	5.80144e+06	1.38545e+07	3.82119e+07	6.30391e+06	1.19369e+07	4.11878e+06
TRUE		C8 H20 N10	Full match	No results	No results	No results	3.72	256.188	369.174	9.834	0	0		DDA for other ion	[M-H+TFA]-1	1.82627e+07	419975	5.89011e+06	9.95559e+06	1.16369e+09	1.12443e+06	626881	2.03157e+06	2.5253e+07	5.25535e+06	1.12448e+07	1.18973e+06	3.07946e+06	2.39365e+07	3.98802e+06	1.77984e+06	709927	8.12193e+06	4.36914e+06	80891.4	69238.3	70169	6.00302e+06	5.01682e+06	5.33696e+06	5.89372e+06	5.83809e+06	5.85492e+06	5.80144e+06	1.38545e+07	3.82119e+07	6.30391e+06	1.19369e+07	4.11878e+06
TRUE	sphinganine	C18 H39 N O2	Full match	No results	Full match	Full match	2.18	301.299	302.306	9.295	3	0		DDA for preferred ion	[M+H]+1	6.51552e+08	6.54662e+08	6.40683e+08	5.76923e+08	5.50289e+08	8.75399e+08	6.08924e+08	6.16905e+08	6.38033e+08	7.11154e+08	6.14862e+08	9.25377e+08	8.18805e+08	5.3831e+08	7.87871e+08	9.0447e+08	1.16053e+09	6.87043e+08	7.35987e+08	8.77844e+07	8.8609e+07	7.69872e+07	5.01656e+08	4.53442e+08	5.18291e+08	5.344e+08	6.36901e+08	4.45415e+08	5.17275e+08	7.94816e+08	7.36348e+08	5.68815e+08	7.02673e+08	6.82719e+08
TRUE	1-[1-(1-Benzothiophen-2-yl)ethyl]urea	C11 H12 N2 O S	Full match	No results	No results	Full match	2.4	220.068	221.075	8.896	2	0		No MS2	[M+H]+1	7.77867e+07	5.33246e+06	2.06969e+07	5.11469e+07	1.1216e+07	8.26022e+07	4.59448e+08	1.28567e+08	4.42775e+07	1.39591e+08	8.9115e+08	7.31412e+08	1.15721e+09	7.86994e+08	4.16304e+08	3.16424e+08	6.17943e+08	5.15668e+08	4.61968e+08	144278	122170	147062	8.00219e+06	7.22335e+06	7.95634e+06	7.08869e+06	6.34598e+06	7.3461e+06	6.6308e+06	1.74179e+07	1.32619e+07	6.30109e+06	7.85913e+07	1.21744e+07
TRUE	Sphingosine (d18:1)	C18 H37 N O2	Full match	Full match	Partial match	Full match	2.04	299.283	300.29	9.479	8	2	96.4	DDA for preferred ion	[M+H]+1	2.33374e+08	8.15681e+08	5.01608e+08	1.83302e+08	3.97411e+07	1.56146e+08	9.75864e+07	1.62541e+08	9.44725e+07	4.33079e+08	5.95747e+07	1.09104e+08	3.70743e+07	6.97344e+07	6.81442e+07	4.4865e+07	5.21103e+07	7.7944e+07	8.39289e+07	1.74999e+06	451647	2.26021e+06	5.56053e+07	4.89501e+07	5.68121e+07	5.12011e+07	5.20111e+07	5.85434e+07	4.89285e+07	7.66066e+07	5.66947e+08	2.16257e+08	6.69031e+08	7.33598e+08
TRUE		C77 H118 N4 O18 P2	Full match	No results	No results	No results	0.13	1448.79	483.938	7.016	0	0		DDA for other ion	[M+3H]+3	7.04127e+06	1.18546e+06	7.31542e+06	1.60859e+06	5.82035e+06	9.9889e+06	5.35007e+06	3.95e+06	1.48759e+07	5.0944e+06	9.72505e+07	3.75826e+07	4.14601e+06	9.23006e+07	7.5722e+07	5.4224e+08	5.75255e+07	1.30459e+08	9.49968e+07	103570	90085.3	82906.2	5.02605e+06	7.38597e+06	6.50004e+06	5.74638e+06	7.294e+06	8.21195e+06	5.42258e+06	5.81494e+07	5.82284e+07	2.58949e+06	8.13325e+07	1.08226e+07
TRUE		C31 H70 N9 O5 P3	Full match	No results	No results	No results	3.41	741.474	742.481	11.085	0	0		No MS2	[M+H]+1	5.02636e+07	2.23409e+07	3.51868e+07	4.31408e+06	1.07292e+07	2.85387e+07	6.34222e+06	1.09453e+07	4.39252e+07	9.40598e+06	1.4561e+08	8.47178e+07	2.53954e+08	6.79177e+06	5.03245e+07	3.9296e+08	5.89401e+06	6.27885e+07	8.70379e+07	449184	460270	469120	7.52426e+06	7.3716e+06	6.9751e+06	7.94181e+06	8.75093e+06	9.42421e+06	9.40425e+06	4.1389e+07	4.39444e+07	4.97525e+07	2.73323e+07	6.18799e+07
TRUE		C54 H105 N9 O18 P2	Full match	No results	No results	No results	0.31	1229.71	615.86	8.862	0	0		No MS2	[M+2H]+2	3.61238e+07	4.94361e+07	4.61247e+06	4.85553e+06	5.40323e+06	1.54898e+07	4.65459e+06	1.30293e+07	6.07476e+06	8.89698e+06	2.1629e+08	7.18559e+07	1.2184e+07	3.34993e+07	9.66016e+06	2.99159e+08	5.14561e+06	1.19745e+07	2.03545e+07	4.03201e+06	3.47631e+06	3.69925e+06	2.71488e+07	3.44173e+07	2.79922e+07	2.61783e+07	2.27238e+07	3.22965e+07	2.69038e+07	5.91007e+06	1.26975e+07	7.3707e+06	1.28308e+08	3.30275e+08
TRUE	Stearoyl glutamic acid	C23 H43 N O5	Full match	No results	No results	Full match	1.87	413.315	414.322	9.412	3	0		DDA for preferred ion	[M+H]+1	9.85374e+07	3.80148e+08	1.43067e+08	3.94698e+07	6.86607e+08	5.43953e+07	3.57007e+07	1.23109e+08	1.14155e+08	1.42914e+08	9.55363e+06	2.02531e+07	7.77244e+06	7.08061e+06	1.192e+06	4.19102e+06	3.32876e+06	1.72077e+06	8.98641e+06	213083	194172	170331	9.43441e+06	1.05536e+07	1.00344e+07	9.26788e+06	9.7041e+06	1.15984e+07	1.02708e+07	4.74173e+07	2.61765e+08	1.14525e+08	3.02471e+08	4.5023e+08
TRUE		C27 H59 N9 O4 P2	Full match	No results	No results	No results	1.57	635.418	636.425	11.523	0	0		No MS2	[M+H]+1	1.79672e+07	862138	3.35241e+06	771091	7.43588e+06	1.16546e+07	772651	4.62473e+06	1.06516e+07	1.68251e+06	2.03753e+07	3.2614e+07	7.16609e+06	9.25933e+06	1.3751e+06	4.30896e+06	7.36585e+06	1.26862e+06	980299	539196	506681	500149	678486	684861	736100	668480	679878	730257	715350	2.00065e+07	2.81368e+06	781915	2.98386e+08	9.08709e+07
TRUE	Melilotoside A2	C36 H58 O9	No results	No results	No results	Full match	-2.17	634.407	635.414	11.517	1	0		No MS2	[M+H]+1	1.87335e+07	1.03571e+06	3.35241e+06	926332	7.43588e+06	1.16546e+07	884775	4.62473e+06	1.06516e+07	1.68251e+06	2.03753e+07	3.46106e+07	6.98262e+06	9.25933e+06	4.58005e+06	4.30896e+06	7.67051e+06	1.52403e+06	1.05004e+06	647751	608690	600843	815083	822741	884296	803063	816755	877278	859369	2.00065e+07	2.81368e+06	848557	2.98386e+08	9.08709e+07
TRUE		C32 H78 N9 O6 P3	Full match	No results	No results	No match	1.22	777.53	778.537	12.59	49	0		No MS2	[M+H]+1	1.94851e+06	2.50562e+08	9.03492e+07	1.04583e+08	6.38483e+07	1.75178e+06	7.8948e+07	5.00355e+07	4.41384e+07	3.99555e+07	2.25905e+06	1.24636e+08	1.22619e+08	1.22499e+08	1.22869e+08	2.1755e+06	1.85482e+08	1.23135e+08	4.88394e+07	1.39635e+06	1.36219e+06	1.17421e+06	6.68708e+07	1.37087e+06	1.5614e+06	1.57399e+06	1.35844e+06	1.36918e+06	1.4464e+06	7.03454e+07	2.23025e+06	3.8763e+08	1.17841e+08	1.1591e+08
TRUE	2-Aminoethyl (2R)-3-[(1Z)-1-hexadecen-1-yloxy]-2-hydroxypropyl hydrogen phosphate	C21 H44 N O6 P	Full match	No results	No results	Full match	1.81	437.291	438.299	11.249	1	0		DDA for preferred ion	[M+H]+1	8.06181e+08	7.28899e+08	1.09184e+09	5.6109e+08	2.87993e+08	5.11088e+08	4.82288e+08	6.476e+08	6.86187e+08	7.21214e+08	6.69764e+08	4.93605e+08	6.31687e+08	6.33972e+08	2.60182e+08	5.21665e+08	9.78056e+08	4.98203e+08	4.04848e+08	311362	348928	319468	1.31937e+08	1.17513e+08	1.12454e+08	1.09858e+08	1.23746e+08	1.26018e+08	1.31103e+08	2.75283e+08	1.0086e+09	4.60374e+08	7.4077e+08	7.05104e+08
TRUE		C19 H36 N6 O	Full match	No results	No results	No match	2.63	364.296	365.303	12.278	14	0		DDA for preferred ion	[M+H]+1	6.89993e+08	1.1311e+09	4.72482e+08	3.54908e+07	4.78296e+07	1.45902e+08	3.16563e+07	5.80389e+08	1.95643e+08	2.47433e+08	1.40113e+08	2.14172e+08	9.97066e+07	1.76406e+08	1.41499e+08	1.56992e+08	2.28305e+08	1.61298e+08	1.22883e+08	335065	284181	404553	2.18362e+07	2.03977e+07	1.97242e+07	2.10301e+07	2.27407e+07	2.29487e+07	1.98979e+07	4.7217e+07	9.1948e+08	4.53518e+07	3.83394e+08	2.98262e+08
TRUE	Histamine	C5 H9 N3	Full match	Full match	No results	Full match	2.81	111.08	112.087	0.812	2	1	76.9	DDA for preferred ion	[M+H]+1	3.65499e+08	2.93732e+08	5.06745e+08	3.50872e+07	2.80977e+08	1.44707e+08	3.21564e+08	2.85274e+08	1.62645e+08	2.08525e+08	9.46925e+07	4.18329e+07	4.59349e+07	1.24053e+08	4.47841e+07	5.07863e+07	5.26823e+07	6.94435e+07	6.36551e+07	67252.3	71280.8	63959.7	4.04627e+07	4.00572e+07	4.08535e+07	4.04951e+07	5.01444e+07	4.62696e+07	4.20382e+07	1.65476e+08	4.65462e+08	3.52247e+08	1.45303e+08	1.71049e+08
TRUE		C23 H51 P3 S	Full match	No results	No results	No match	-2.26	452.291	516.307	10.808	2	0		No MS2	[M+ACN+Na]+1	7.76088e+07	2.35385e+08	1.8503e+08	1.02995e+08	5.13206e+07	3.58305e+07	7.39191e+07	3.93159e+07	1.14721e+08	6.18317e+08	4.51025e+07	2.80295e+07	4.62974e+07	4.35256e+07	1.45849e+07	5.02818e+06	4.79285e+07	1.88915e+07	1.27705e+07	400170	363044	355875	1.5432e+07	1.63039e+07	1.65369e+07	1.73779e+07	1.64032e+07	2.59125e+07	1.87789e+07	8.81637e+07	2.53735e+08	1.58727e+08	1.54715e+08	2.94349e+08
TRUE		C34 H82 N9 O5 P3	Full match	No results	No results	No match	1.36	789.566	790.573	12.292	7	0		No MS2	[M+H]+1	1.53733e+08	1.54944e+06	6.5546e+08	3.91432e+08	4.61284e+08	9.83129e+07	1.34537e+06	6.49099e+08	3.50931e+08	3.26526e+08	1.3627e+08	3.62642e+06	4.71973e+08	4.24035e+08	1.02507e+09	2.8846e+07	1.25844e+06	1.11843e+09	2.63992e+08	667116	565806	676150	4.07506e+07	5.74657e+07	2.53025e+08	1.10398e+08	8.00376e+07	1.2189e+08	9.62247e+07	1.9725e+08	1.71971e+08	1.4874e+06	1.94588e+08	1.63341e+08
TRUE	2-({[(2S,3R)-2-Methyl-3-pentadecyl-2-oxiranyl]carbonyl}amino)propyl acetate	C24 H45 N O4	Full match	No results	No results	Full match	1.18	411.335	412.343	9.802	2	0		No MS2	[M+H]+1	1.64974e+07	2.36145e+08	5.87523e+07	3.47543e+07	1.11555e+09	8.35518e+06	7.37786e+06	1.10511e+07	6.16118e+07	1.1949e+07	1.67532e+06	2.17677e+07	6.65571e+06	1.9825e+07	1.34028e+06	2.82144e+06	1.61659e+06	910524	2.62063e+06	181508	202570	214156	4.57962e+06	3.69334e+06	6.04139e+06	5.20378e+06	3.02385e+06	6.683e+06	5.75986e+06	3.33824e+06	5.56341e+07	3.51574e+07	1.35971e+08	1.87782e+08
TRUE		C39 H83 N6 O9 P	Full match	No results	No results	No results	0.39	810.596	811.604	13.17	0	0		No MS2	[M+H]+1	9.20515e+07	5.55063e+06	1.86387e+07	2.27702e+07	8.95682e+07	8.68182e+07	1.45606e+06	4.12669e+07	3.28648e+07	3.03994e+07	5.71946e+06	1.59068e+06	6.30783e+06	1.69917e+07	8.65985e+07	4.09166e+06	8.17065e+06	7.09927e+06	1.87351e+07	679289	653247	712352	2.11936e+07	8.3848e+07	1.93687e+07	2.37642e+07	1.41309e+07	1.15877e+07	1.1148e+09	3.5037e+07	5.62605e+06	1.11557e+07	6.51765e+06	3.47534e+07
TRUE		C45 H80 N5 O4 P	Full match	No results	No results	No match	0.21	785.595	786.602	14.32	69	0		No MS2	[M+H]+1	7.94652e+08	2.86786e+06	4.88848e+08	8.42388e+08	4.13267e+08	1.07015e+09	5.04429e+06	8.52209e+08	4.45539e+08	9.97275e+08	7.79997e+08	5.98267e+06	3.58202e+08	4.53251e+08	4.82072e+08	4.53946e+08	8.21848e+06	4.94375e+08	3.82669e+08	1.37485e+06	1.18876e+06	1.52339e+06	3.69701e+08	1.11138e+09	7.47351e+08	6.22943e+08	5.97662e+08	9.11912e+08	2.05465e+08	3.18711e+08	5.17536e+08	5.25816e+06	3.20823e+08	3.13908e+08
TRUE		C53 H92 N3 O11 P3	Full match	No results	No results	No match	-0.7	1039.59	520.804	7.635	1	0		DDA for other ion	[M+2H]+2	2.14354e+08	5.77173e+08	4.60417e+08	5.50768e+06	1.16921e+08	4.76127e+07	2.57291e+07	3.39661e+08	2.24622e+08	1.91523e+08	770057	1.17634e+07	134962	6.25551e+07	1.0935e+07	8.74907e+06	1.06674e+06	1.12755e+07	8.79357e+06	66528.1	112941	56730.1	4.46426e+06	3.58615e+06	7.09316e+06	7.238e+06	4.25573e+06	8.54557e+06	6.30838e+06	3.79817e+07	5.84665e+08	3.6147e+06	8.04508e+08	5.87856e+08
TRUE		C36 H80 N8 O6 P2	Full match	No results	No results	No match	-1.39	782.567	783.574	12.742	1	0		No MS2	[M+H]+1	7.00032e+08	5.00704e+06	6.43524e+08	6.50635e+08	5.22815e+08	4.86464e+08	3.57072e+06	2.64026e+08	2.85066e+08	3.81379e+08	5.51004e+08	1.48299e+06	6.13729e+08	1.01515e+08	1.06046e+09	9.35805e+07	3.00078e+06	7.67188e+08	1.26865e+08	482608	344799	405198	6.44716e+08	3.8951e+08	8.93539e+08	8.1753e+08	8.75881e+08	8.93349e+08	1.92022e+07	7.83054e+08	2.30735e+08	3.44956e+06	1.64717e+08	1.37017e+08
TRUE		C40 H81 N3 O5 P2	Full match	No results	No results	No match	-1.63	745.564	746.571	14.362	55	0		No MS2	[M+H]+1	1.10533e+06	8.96787e+06	1.10654e+09	9.39452e+07	7.01298e+07	997272	1.31819e+07	1.58036e+07	3.36903e+06	5.05929e+07	946723	2.23144e+06	1.49394e+07	1.80238e+06	8.86798e+06	1.10064e+06	2.42682e+06	3.26591e+06	4.28593e+06	838997	714110	732635	4.31515e+07	837423	816669	858080	811104	998647	2.02231e+07	4.67097e+06	1.07035e+06	6.78409e+07	1.56701e+07	1.26814e+08
TRUE		C76 H131 N6 O15 P3 S	Full match	No results	No results	No results	-0.11	1492.86	747.438	8.955	0	0		DDA for other ion	[M+2H]+2	3.4526e+07	5.28626e+07	2.39004e+06	2.52395e+06	4.24907e+06	1.08018e+07	2.51019e+06	9.76302e+06	5.02597e+06	1.34893e+07	2.50589e+08	1.03526e+08	5.16329e+06	4.40547e+07	6.22745e+06	4.71537e+08	4.31982e+06	8.10779e+06	2.07677e+07	543308	726284	846993	2.06635e+07	2.50388e+07	2.10384e+07	1.30315e+07	2.19463e+07	2.45083e+07	3.01388e+07	1.98168e+06	1.00293e+07	4.38268e+06	1.90854e+08	4.16212e+08
TRUE		C24 H45 N2 O3 P	Full match	No results	No results	No results	-4.89	440.315	441.322	10.854	0	0		DDA for other ion	[M+H]+1	1.33577e+08	1.36338e+08	8.65527e+07	2.86233e+07	4.32259e+07	6.45212e+07	2.41362e+07	7.74939e+07	6.42736e+07	4.07227e+07	2.05616e+08	3.66244e+08	3.79132e+08	6.6739e+07	1.69862e+08	8.28161e+08	5.94654e+07	8.54071e+07	2.47412e+08	2.32581e+06	1.81645e+06	1.71029e+06	2.05978e+07	2.32242e+07	2.32068e+07	1.90222e+07	2.22282e+07	2.69748e+07	2.04477e+07	1.64616e+08	6.13011e+07	1.76912e+08	8.94193e+07	9.40369e+07
TRUE		C32 H61 N7 O	Full match	No results	No results	No results	2.21	559.495	560.502	13.205	0	0		No MS2	[M+H]+1	2.05887e+06	1.88e+08	1.27535e+08	1.39951e+08	2.94089e+08	1.43402e+06	3.14703e+08	2.00082e+08	8.81701e+08	4.39528e+08	2.26441e+06	1.97398e+08	4.65851e+08	3.006e+08	6.54739e+08	1.84828e+06	1.47849e+08	1.95409e+08	3.59069e+08	624284	977134	654670	2.72487e+08	982769	885247	896930	895444	793198	1.07741e+06	1.31489e+08	1.61296e+06	1.00613e+08	2.84132e+07	5.922e+07
TRUE		C39 H75 N9 O2 P2	Full match	No results	No results	No match	-1.6	763.551	764.558	11.332	6	0		No MS2	[M+H]+1	1.14792e+07	1.53901e+06	1.28322e+06	1.08559e+06	953876	992637	1.01057e+06	2.53781e+06	1.32626e+06	3.75332e+06	2.62613e+06	1.35558e+06	5.32554e+08	3.04133e+08	1.09765e+09	3.54595e+07	1.30501e+06	7.18548e+08	6.01616e+08	642603	649633	726318	6.34128e+06	794818	832371	1.47343e+08	1.00095e+07	6.69065e+06	5.11279e+07	1.17356e+08	1.11738e+07	1.21607e+06	1.68776e+07	5.57013e+06
TRUE		C31 H77 N10 O3 P3	Full match	No results	No results	No match	-4.18	730.536	731.544	12.033	1	0		No MS2	[M+H]+1	1.86415e+06	3.20103e+08	5.28627e+08	3.57643e+08	2.13262e+08	1.20673e+06	1.33665e+08	2.82399e+08	1.37095e+08	3.26508e+08	1.96962e+06	7.09824e+07	2.34931e+08	6.40223e+07	4.04012e+08	1.2642e+06	3.26043e+08	2.86483e+08	1.21131e+08	566203	547650	586675	2.06222e+07	1.1488e+06	1.40873e+06	574742	666406	1.19337e+06	1.01399e+06	8.82196e+07	1.49177e+06	2.54144e+08	2.07265e+08	3.268e+08
TRUE		C39 H81 N9 O2 P2	Full match	No results	No results	No match	1.16	769.6	770.607	12.976	18	0		No MS2	[M+H]+1	2.15776e+07	1.41297e+07	3.62153e+07	3.08874e+07	2.09959e+07	4.32468e+06	8.68667e+06	5.72032e+07	4.3956e+07	1.03286e+08	2.02991e+07	4.2836e+06	1.88755e+08	2.26669e+08	3.97316e+08	7.49045e+07	2.75274e+06	6.80523e+08	4.67825e+08	728876	784051	765886	6.75759e+07	1.99592e+06	3.55545e+06	6.85686e+07	4.11447e+07	2.61539e+07	3.25899e+08	9.44269e+07	5.13535e+07	7.80339e+06	2.90523e+08	1.08912e+08
TRUE		C47 H80 N5 P3	Full match	No results	No results	No match	1.41	807.564	808.571	11.787	1	0		No MS2	[M+H]+1	9.8884e+06	1.57374e+06	1.63899e+07	1.18844e+06	2.77354e+06	6.44863e+06	5.49691e+06	1.75567e+07	5.86112e+06	1.86134e+06	5.88759e+07	1.04655e+08	2.3798e+07	1.65601e+07	5.65608e+06	1.43897e+07	1.77538e+07	9.83535e+06	1.18447e+07	739322	635359	707507	828437	841218	749733	786052	788060	745796	931565	1.44219e+07	9.44883e+06	3.82247e+06	2.55416e+08	7.26404e+07
TRUE		C40 H81 N5 O7 P2	Full match	No results	No results	No match	0.16	805.561	806.569	11.75	52	0		No MS2	[M+H]+1	8.82983e+07	924056	2.08065e+08	5.49238e+07	1.20639e+06	5.37543e+07	5.49691e+06	3.12845e+08	1.55718e+08	2.07545e+08	7.12505e+07	1.04655e+08	7.86708e+07	9.34064e+06	5.65608e+06	3.85637e+07	1.77538e+07	9.83535e+06	8.6701e+07	434109	418094	415428	501134	493939	574774	468739	462727	647856	546989	3.99339e+07	1.17707e+08	3.37293e+06	1.28924e+08	7.26404e+07
TRUE		C55 H94 N4 O14 P2	Full match	No results	No results	No results	0.03	1096.62	549.319	8.815	0	0		DDA for other ion	[M+2H]+2	3.78982e+07	3.35247e+07	9.63779e+06	1.05992e+07	8.10595e+06	2.54651e+07	1.44078e+07	1.88941e+07	1.48485e+07	1.32082e+07	1.81689e+08	8.17063e+07	3.61777e+07	5.18729e+07	1.75039e+07	2.56703e+08	1.33897e+07	2.78955e+07	4.24581e+07	1.12596e+07	1.26375e+07	1.22982e+07	3.29458e+07	3.77796e+07	3.33183e+07	2.84278e+07	3.49563e+07	3.2906e+07	2.80835e+07	1.45062e+07	1.28247e+07	1.5439e+07	8.58353e+07	2.66486e+08
TRUE		C36 H78 N8 O8 S	Full match	No results	No results	No match	0.04	782.566	783.574	14.465	1	0		No MS2	[M+H]+1	4.27144e+06	5.01151e+07	5.38661e+07	1.07948e+09	5.11989e+07	5.81907e+06	7.75949e+07	1.45213e+07	4.52973e+07	8.12059e+07	1.61697e+07	3.52199e+07	4.62756e+07	2.42374e+07	2.52142e+07	8.77253e+06	3.07019e+07	2.20054e+07	4.24251e+07	889973	826032	834641	2.95204e+07	3.3987e+06	4.93369e+06	3.10684e+06	2.63821e+06	3.9308e+06	1.07405e+06	2.0783e+07	5.02811e+06	5.75093e+07	2.66846e+07	6.07846e+07
TRUE		C34 H78 N8 O6 P2	Full match	No results	No results	No results	-0.92	756.551	757.559	13.135	0	0		No MS2	[M+H]+1	1.00348e+07	3.71515e+08	7.3996e+07	1.66318e+08	2.06652e+08	7.24888e+06	2.58584e+08	2.2176e+08	2.07155e+08	2.17916e+08	5.04682e+06	5.73053e+08	3.47432e+08	5.08325e+08	7.44166e+08	4.74019e+06	4.21516e+08	7.4017e+08	2.59037e+08	794101	829449	832752	1.28907e+08	1.72548e+06	5.33237e+06	1.13672e+06	2.48674e+06	2.50738e+06	1.31132e+06	4.21931e+08	7.31437e+06	4.51701e+08	1.30547e+08	1.17265e+08
TRUE		C43 H78 N5 O3 P	Full match	No results	No results	No match	0.35	743.584	744.592	12.056	17	0		No MS2	[M+H]+1	1.58653e+07	2.11548e+06	1.77443e+07	3.32707e+07	1.395e+07	4.07516e+06	1.17738e+06	2.55465e+07	2.21415e+07	1.18792e+07	1.38346e+07	1.66013e+06	1.94331e+06	3.15595e+07	4.25556e+07	7.5368e+06	1.50835e+06	6.61268e+07	3.18275e+07	537449	519838	556881	9.62838e+06	5.29604e+06	1.15325e+07	2.28217e+06	1.18227e+07	9.6701e+06	3.44901e+08	7.47501e+06	1.39327e+07	1.4423e+06	6.80708e+07	1.29603e+07
TRUE		C37 H66 O7 P2	Full match	No results	No results	No results	2.28	684.43	685.437	13.027	0	0		DDA for preferred ion	[M+H]+1	6.04127e+07	1.58628e+08	3.57365e+07	2.70178e+07	2.3953e+07	5.81409e+07	3.44664e+07	3.79888e+07	3.87519e+07	3.78687e+07	6.21514e+07	1.04763e+08	1.15462e+08	3.6511e+07	1.20129e+08	7.43431e+07	5.29368e+07	1.37839e+08	1.15648e+08	9.86911e+07	1.121e+08	1.00465e+08	7.4284e+07	4.78245e+07	1.06673e+08	5.77095e+07	1.19125e+08	1.0326e+08	8.75993e+08	8.74263e+07	5.24907e+07	6.48115e+07	4.74367e+07	5.56045e+07
TRUE	(2S)-1-{[11-(3,4-Dimethyl-5-propyl-2-furyl)undecanoyl]oxy}-3-hydroxy-2-propanyl 13-(3-methyl-5-pentyl-2-furyl)tridecanoate	C46 H78 O7	No results	No results	No results	Full match	-3.24	742.572	743.579	12.063	9	0		No MS2	[M+H]+1	1.29494e+07	1.23618e+06	1.77443e+07	3.32707e+07	1.35673e+07	3.05516e+06	688002	2.55465e+07	2.21415e+07	9.84274e+06	1.20602e+07	957461	962793	2.14577e+07	4.25556e+07	9.44483e+06	881403	6.61268e+07	2.47437e+07	314057	303766	325412	8.73884e+06	5.29604e+06	1.15325e+07	1.53631e+06	9.7563e+06	9.6701e+06	3.44901e+08	5.50336e+06	1.62408e+07	738654	1.10547e+07	1.02332e+07
TRUE		C34 H80 N8 O5 P2	Full match	No results	No results	No match	-0.07	742.573	743.58	11.269	9	0		No MS2	[M+H]+1	3.16786e+06	1.10529e+06	1.24129e+06	998307	1.40746e+06	937570	870055	1.17042e+06	1.28292e+06	5.03613e+06	3.208e+06	1.31128e+06	6.39109e+08	2.28534e+08	1.06867e+09	5.96802e+07	1.13135e+06	5.65385e+08	6.28233e+08	658295	638857	702586	1.13508e+07	905158	805174	1.72535e+08	1.44351e+07	1.79737e+06	4.12253e+07	1.36136e+08	1.81773e+07	1.09268e+06	9.05017e+06	9.63309e+06
TRUE		C24 H27 N3	Full match	No results	No results	No results	2.64	357.221	358.229	8.982	0	0		No MS2	[M+H]+1	1.6285e+06	7.29045e+06	3.3994e+06	592105	1.02318e+06	2.80444e+06	1.25624e+06	494863	4.52477e+06	2.75192e+06	7.12205e+06	1.06672e+09	7.92713e+06	9.81455e+06	3.93818e+06	7.33143e+07	6.35887e+06	6.25724e+06	1.389e+08	99185.1	103883	116291	7.6459e+06	6.96174e+06	8.48293e+06	6.54561e+06	9.02029e+06	1.0222e+07	9.87306e+06	2.33764e+06	5.6554e+06	2.91766e+06	3.1631e+06	1.25823e+07
TRUE		C57 H81 N2 O3 P3	Full match	No results	No results	No results	0.17	934.546	957.535	11.151	0	0		No MS2	[M+Na]+1	673481	2.80681e+08	1.7687e+06	6.89802e+06	559170	2.43893e+06	1.28602e+07	1.51972e+08	5.05842e+08	565683	2.08218e+06	1.06456e+09	3.34032e+06	5.01768e+08	5.67098e+06	2.24694e+07	1.0436e+07	5.244e+08	585112	390747	409122	402767	2.07451e+07	2.46508e+07	2.42385e+07	2.11925e+07	2.45333e+07	2.55972e+07	2.33154e+07	2.49568e+07	3.42686e+08	732190	701573	693956
TRUE		C50 H77 N4 O12 P	Full match	No results	No results	No results	0.36	956.528	957.535	11.151	0	0		No MS2	[M+H]+1	673481	2.80681e+08	1.7687e+06	6.89802e+06	532842	2.43893e+06	1.28602e+07	1.51972e+08	5.05842e+08	539048	2.08218e+06	1.06456e+09	3.34032e+06	5.01768e+08	5.67098e+06	2.24694e+07	1.0436e+07	5.244e+08	557563	372349	389859	383803	2.07451e+07	2.46508e+07	2.42385e+07	2.11925e+07	2.45333e+07	2.55972e+07	2.33154e+07	2.49568e+07	3.42686e+08	697715	668540	661281
TRUE		C14 H10 N10 O6 S	Full match	No results	No results	No results	2.63	446.052	447.059	6.758	0	0		DDA for preferred ion	[M+H]+1	4.64672e+08	3.81258e+08	3.08613e+08	2.19877e+08	2.55374e+08	6.912e+07	1.94142e+08	4.80126e+08	5.03753e+08	4.30581e+08	2.17528e+08	3.32736e+08	1.6222e+08	3.00705e+08	8.72205e+07	1.11338e+08	4.8326e+07	1.41436e+08	1.72909e+08	121918	112917	121533	1.11846e+06	408659	386993	1.21302e+06	174144	1.90347e+06	1.69759e+07	4.05695e+08	4.20002e+08	1.77218e+08	1.98925e+08	1.76941e+08
TRUE	persin	C23 H40 O4	Full match	No results	No results	Full match	0.65	380.293	783.576	12.749	15	0		No MS2	[2M+Na]+1	3.15293e+08	5.00704e+06	1.06215e+08	298352	6.95421e+07	3.04046e+08	3.57072e+06	1.06906e+08	1.52722e+08	2.0475e+08	5.51004e+08	1.48299e+06	6.13729e+08	1.18869e+08	1.06027e+09	9.35805e+07	3.00078e+06	1.37262e+08	1.47508e+08	630613	283987	271530	3.1314e+07	3.79899e+08	8.93539e+08	1.62044e+08	8.75881e+08	1.49797e+08	2.11413e+07	1.41542e+08	1.45441e+08	2.78428e+06	5.21093e+08	5.91882e+07
TRUE		C41 H85 N5 O2 P2 S2	Full match	No results	No results	No match	-0.95	805.561	806.568	10.946	52	0		No MS2	[M+H]+1	2.97772e+08	9.26125e+06	7.42492e+08	5.04288e+08	6.48986e+08	2.4838e+08	3.9616e+06	1.05195e+09	2.45176e+08	3.09586e+08	2.0695e+08	1.31744e+07	1.33633e+08	4.64096e+08	3.43587e+08	7.24999e+07	4.73476e+06	4.23264e+08	3.09819e+08	2.30016e+06	2.45376e+06	2.39554e+06	3.17671e+08	2.049e+08	9.84666e+08	3.30388e+07	8.41786e+08	7.52138e+08	6.94959e+07	1.13842e+08	2.00408e+08	9.77545e+06	1.23958e+08	1.93663e+07
TRUE		C49 H86 N O P3 S	Full match	No results	No results	No match	-0.82	829.564	830.571	12.397	35	0		No MS2	[M+H]+1	1.80147e+06	2.15172e+07	7.50761e+06	1.03004e+07	3.64513e+06	1.14441e+06	1.45052e+06	6.06177e+06	3.18746e+06	6.80344e+06	1.79483e+06	6.2155e+06	4.12425e+06	3.14193e+06	9.88159e+06	1.37418e+06	1.40255e+07	1.6063e+07	1.78087e+06	1.01767e+06	965255	964674	1.10882e+06	949591	2.69703e+06	1.07198e+06	1.07482e+06	1.12104e+06	1.07763e+06	3.02807e+06	1.49706e+06	9.24904e+06	1.89096e+06	6.55751e+06
TRUE		C54 H76 S2	Full match	No results	No results	No results	0.13	788.539	830.571	12.374	0	0		No MS2	[M+ACN+H]+1	414891	4.32692e+06	2.79882e+06	1.83287e+06	2.31708e+06	389093	1.14275e+06	3.18585e+06	514942	3.40031e+06	474584	579447	4.12425e+06	3.14193e+06	9.88159e+06	377507	488222	5.41453e+06	1.78087e+06	294639	252308	326579	344532	322856	926663	307648	365432	381148	366389	479142	393573	4.66661e+06	642916	596139
TRUE		C16 H24 N6 O2	Full match	No results	No results	No results	2.92	332.197	333.204	10.029	0	0		No MS2	[M+H]+1	2.42493e+07	2.05328e+07	3.42285e+07	1.48572e+07	1.75082e+07	2.03994e+07	2.45912e+07	1.42441e+07	5.33619e+07	4.34723e+07	1.59368e+07	4.33584e+07	2.66425e+07	1.7027e+07	8.56441e+06	1.21521e+07	1.23393e+07	6.71981e+06	7.84497e+07	5.1164e+06	5.10889e+06	4.61974e+06	7.53984e+06	7.03542e+06	5.88654e+06	7.03754e+06	6.44615e+06	6.4793e+06	6.29268e+06	3.55938e+07	1.45481e+07	2.24207e+07	4.62123e+08	1.13564e+08
TRUE		C16 H24 N6 O2	Full match	No results	Invalid mass	Invalid mass	2.99	332.197	333.204	10.145	39	0		No MS2	[M+H]+1	6.66693e+06	6.64385e+06	3.42285e+07	7.29444e+06	3.82706e+07	2.03994e+07	8.80864e+06	9.97178e+06	1.17729e+07	4.82509e+06	1.66993e+07	7.15139e+07	6.51772e+07	1.7027e+07	1.25105e+07	1.33897e+07	2.07009e+07	1.66129e+07	4.19406e+07	2.75012e+06	2.21996e+06	2.60563e+06	3.81287e+06	3.21117e+06	3.55654e+06	3.76625e+06	3.17686e+06	1.66616e+06	926476	2.02886e+07	8.20822e+06	2.24207e+07	1.82515e+07	4.16036e+06
TRUE		C36 H77 N10 O5 P	Full match	No results	No results	No results	1.67	760.583	761.59	12.974	0	0		No MS2	[M+H]+1	4.40942e+08	8.43063e+06	1.04289e+09	3.44738e+08	4.53624e+08	5.47991e+08	6.4063e+06	9.23266e+08	4.94167e+08	8.13118e+08	7.00325e+08	8.73693e+06	5.27738e+08	4.13339e+08	5.33821e+08	4.79865e+08	6.38099e+06	6.13983e+08	3.27237e+08	1.55588e+06	1.55319e+06	1.39488e+06	1.82726e+08	3.70786e+08	8.15238e+08	2.91812e+08	3.73766e+08	4.58804e+08	4.30072e+07	4.49706e+08	7.27944e+08	7.36138e+06	4.34951e+08	4.89892e+08
TRUE		C43 H87 N3 O5 P2	Full match	No results	No results	No match	0.4	787.612	788.618	13.728	54	0		DDA for preferred ion	[M+H]+1	1.49134e+08	1.03684e+09	1.60534e+06	8.71462e+07	2.4143e+08	1.66289e+06	9.06791e+08	1.56974e+06	4.00803e+08	2.78276e+08	1.85558e+06	6.11128e+08	2.09731e+06	6.35673e+07	1.43292e+08	2.27719e+06	3.75366e+08	2.04563e+06	1.34337e+08	1.27631e+06	1.29788e+06	1.38451e+06	1.68853e+06	6.97975e+08	1.9038e+08	2.66223e+08	1.13941e+08	1.19557e+08	1.54313e+06	1.47675e+08	2.32542e+06	2.73538e+08	2.17578e+06	1.40088e+08
TRUE		C39 H80 O7 P2	Full match	No results	No results	No results	-3.73	722.535	723.543	10.093	0	0		No MS2	[M+H]+1	6.35592e+06	7.94128e+07	1.35236e+08	7.65757e+07	5.437e+07	7.36966e+06	3.64775e+07	5.14007e+07	5.08564e+07	8.19374e+07	1.07736e+07	5.12321e+08	7.32039e+08	8.68112e+08	3.49181e+08	1.01762e+07	4.09914e+08	5.83475e+08	4.0932e+08	1.20629e+07	8.38328e+06	2.09954e+07	2.79352e+07	1.32068e+07	6.62342e+06	8.56649e+06	1.46288e+07	7.91408e+06	7.46529e+06	3.57451e+08	8.41359e+06	2.65322e+08	4.33495e+07	1.9673e+08
TRUE		C49 H70 N4 O10	Full match	No results	No results	No results	0.67	874.51	875.517	10.612	0	0		No MS2	[M+H]+1	498018	1.57001e+08	512655	2.75444e+06	397130	511237	1.90063e+06	8.07621e+07	1.75768e+08	488392	1.55604e+06	1.03471e+09	2.91189e+06	2.1471e+08	780721	1.09401e+07	2.44321e+06	1.91231e+08	482695	293241	282861	277294	3.5685e+06	3.63585e+06	3.86e+06	4.47519e+06	3.45169e+06	4.39374e+06	4.98821e+06	4.42062e+06	1.16076e+08	2.25875e+06	564170	1.00358e+06
TRUE		C31 H32	Full match	No results	No results	No results	2.08	404.251	831.491	10.611	0	0		DDA for other ion	[2M+Na]+1	463757	1.42774e+08	833611	2.65176e+06	393639	506743	2.54082e+06	7.89549e+07	1.66709e+08	495673	1.98999e+06	1.03391e+09	2.79841e+06	2.22934e+08	888269	1.3549e+07	1.95084e+06	2.01154e+08	621129	290663	280374	274856	3.83743e+06	3.2446e+06	3.29548e+06	3.11686e+06	3.00005e+06	4.19908e+06	4.70762e+06	5.46232e+06	1.03213e+08	822032	559210	582502
TRUE		C80 H116 N7 O18 P	Full match	No results	No results	No results	0.47	1493.81	498.945	7.605	0	0		DDA for other ion	[M+3H]+3	2.0701e+07	795229	2.65546e+06	1.40936e+06	4.92272e+06	1.08932e+07	2.51579e+07	1.78978e+07	3.34318e+07	6.74365e+06	4.37348e+08	5.74054e+07	1.60186e+07	3.16131e+08	9.23629e+07	2.32634e+08	2.16206e+08	1.09183e+08	8.37323e+07	23877.8	38950.1	55753.7	2.90032e+06	2.56399e+06	4.75175e+06	5.25543e+06	2.17637e+06	5.62446e+06	3.81381e+06	2.00869e+07	1.94412e+06	2.74768e+06	2.97071e+07	1.01319e+07
TRUE		C38 H81 N10 O5 P	Full match	No results	No results	No match	0.96	788.614	789.621	13.476	3	0		No MS2	[M+H]+1	1.61844e+08	1.64826e+08	1.33084e+06	8.00685e+07	2.10478e+08	1.13208e+06	8.13272e+07	1.15023e+06	1.02482e+09	3.44945e+08	1.1659e+06	3.69083e+08	1.33017e+06	3.06686e+07	1.96755e+08	1.27402e+06	3.45065e+08	1.12161e+06	3.00657e+08	822074	897315	847706	1.02124e+06	7.73821e+08	2.72492e+08	2.54818e+08	1.96274e+08	2.16408e+08	8.67456e+06	1.16712e+08	1.00699e+06	3.51437e+08	1.42285e+06	1.89884e+08
TRUE		C35 H82 N8 O5 P2	Full match	No results	No results	No match	-1.33	756.587	789.621	13.389	7	0		No MS2	[M+H+MeOH]+1	1.61844e+08	1.64826e+08	1.17606e+06	8.00685e+07	2.10478e+08	821386	3.21486e+07	1.0387e+06	1.02482e+09	3.91344e+07	1.08947e+06	1.0088e+08	1.17547e+06	3.06686e+07	4.07953e+08	1.16122e+06	3.45065e+08	1.06714e+06	3.00657e+08	760909	739195	733985	902470	7.73824e+08	2.72492e+08	5.91002e+08	1.96274e+08	2.16408e+08	2.14293e+06	1.16712e+08	1.02449e+06	3.51437e+08	1.25738e+06	1.89884e+08
TRUE		C48 H84 N4 O13	Full match	No results	No results	No results	0.62	924.604	947.593	10.857	0	0		No MS2	[M+Na]+1	1.64301e+08	4.24897e+08	1.5681e+08	8.46908e+06	2.89816e+07	1.05259e+08	1.83668e+07	2.342e+08	4.18005e+08	3.71109e+07	2.96009e+08	1.02361e+09	3.66525e+08	3.91265e+07	7.41391e+07	3.44248e+08	2.43488e+07	4.53156e+08	1.42607e+08	450537	559792	495889	3.32673e+07	3.68478e+07	3.50117e+07	3.86925e+07	3.81474e+07	3.98155e+07	3.38091e+07	1.48565e+08	5.66514e+08	1.63946e+08	1.36033e+08	1.9793e+08
TRUE	quinolone	C9 H7 N O	Full match	No results	No results	Full match	2.59	145.053	146.06	4.881	6	0		No MS2	[M+H]+1	2.75793e+08	3.73563e+08	2.85093e+08	1.29293e+08	1.27342e+08	1.0858e+08	2.36522e+07	1.56585e+08	1.99018e+08	2.00636e+08	1.69738e+07	5.31332e+07	1.92813e+07	7.07737e+07	2.92376e+07	4.72613e+07	3.4271e+07	5.28973e+07	2.96347e+07	3.50482e+06	3.24682e+06	3.12464e+06	1.90399e+07	2.36844e+07	2.4252e+07	2.01185e+07	2.48453e+07	2.32917e+07	2.28105e+07	1.12477e+08	5.87372e+08	3.23739e+07	4.52472e+08	3.81154e+08
TRUE		C21 H42 N6 O4	Full match	No results	No results	No match	2.58	442.328	443.335	11.275	3	0		DDA for preferred ion	[M+H]+1	7.65366e+07	3.80628e+08	3.20082e+08	4.66426e+08	3.64522e+08	4.9781e+08	6.55045e+07	1.02171e+09	6.28774e+07	5.02975e+08	2.95287e+08	5.86568e+08	9.67928e+07	8.58209e+08	8.7418e+07	4.36879e+08	8.45256e+08	1.54342e+08	1.70573e+08	5.26842e+07	1.21938e+08	1.1038e+08	1.2268e+08	1.16869e+08	1.11188e+08	1.35183e+08	1.13233e+08	1.15535e+08	1.12407e+08	5.72558e+08	2.57646e+08	3.71276e+08	7.06303e+07	2.96567e+08
TRUE	4-Undecylbenzenesulfonic acid	C17 H28 O3 S	Full match	No results	No results	Full match	1.36	312.176	311.169	14.542	1	0		DDA for preferred ion	[M-H]-1	2.7441e+08	1.17149e+08	9.22228e+07	1.10907e+08	7.9576e+07	1.98873e+08	8.60067e+07	7.84746e+07	5.3264e+07	4.0629e+07	1.9922e+08	3.71397e+08	1.96144e+08	1.29931e+08	9.52395e+07	4.24426e+08	1.91461e+08	1.45981e+08	1.39422e+08	2.61476e+07	2.91809e+07	2.59649e+07	4.81631e+07	8.09694e+07	5.15194e+07	1.03555e+08	9.95168e+07	1.14081e+08	1.62002e+08	3.85669e+08	1.01997e+09	1.56649e+08	1.96355e+08	1.69239e+08
TRUE		C21 H45 O7 P	Full match	No results	No results	No match	1.67	440.291	482.325	11.615	7	0		DDA for other ion	[M+ACN+H]+1	6.77681e+08	7.56162e+08	9.35856e+08	7.61492e+08	2.21783e+08	4.83401e+08	6.16342e+08	7.21834e+08	6.04418e+08	1.00286e+09	2.68563e+08	3.27504e+08	2.92734e+08	2.95962e+08	1.46954e+08	2.41473e+08	3.42182e+08	2.18118e+08	2.47835e+08	323107	337754	333726	1.31584e+08	1.42096e+08	1.30463e+08	1.25243e+08	1.55873e+08	1.67889e+08	2.3019e+08	2.96615e+08	8.3672e+08	6.17876e+08	1.01706e+09	7.91317e+08
TRUE		C42 H74 N P3	Full match	No results	No results	No match	0.17	685.504	764.523	12.275	1	0		No MS2	[M+DMSO+H]+1	1.65331e+08	2.43312e+06	1.31299e+08	9.00695e+07	1.42007e+08	3.46709e+08	2.31513e+06	1.01526e+09	1.55865e+08	2.38776e+08	1.20683e+08	4.87973e+06	2.65231e+06	2.31659e+06	5.54142e+07	4.4181e+06	5.90122e+06	3.02585e+07	1.24124e+06	487193	413207	493791	4.47225e+07	8.84119e+07	2.33153e+08	1.09878e+06	5.18029e+06	4.61935e+07	1.04691e+06	1.38133e+06	1.51819e+07	8.56791e+06	8.21244e+06	2.72941e+07
TRUE		C42 H79 N3 O5 P2	Full match	No results	No results	No match	-1.63	767.548	768.556	12.254	73	0		No MS2	[M+H]+1	1.21813e+08	2.43312e+06	1.31299e+08	1.78615e+08	1.05406e+08	3.46709e+08	2.31513e+06	1.01316e+09	1.55603e+08	2.08557e+08	1.05587e+08	4.31847e+06	3.17094e+06	2.26008e+06	1.88244e+06	4.25914e+07	3.00026e+06	2.0871e+06	1.48395e+06	582458	494005	590801	2.0971e+07	8.71776e+07	2.31315e+08	1.4173e+06	5.18029e+06	4.96519e+07	1.25162e+06	5.12624e+07	1.51819e+07	3.5938e+06	8.21244e+06	2.40551e+07
TRUE		C43 H82 N4 O18	Full match	No results	No results	No results	0.58	942.563	472.289	8.757	0	0		DDA for other ion	[M+2H]+2	4.68738e+07	3.85508e+07	2.60945e+07	2.4794e+07	2.10218e+07	3.73114e+07	4.33289e+07	3.76288e+07	3.453e+07	2.60499e+07	1.26329e+08	7.20237e+07	6.14716e+07	5.74548e+07	3.41904e+07	1.69109e+08	2.76912e+07	4.20148e+07	4.14255e+07	2.15335e+07	2.6616e+07	2.77073e+07	3.41965e+07	3.52673e+07	3.6816e+07	3.74144e+07	3.52062e+07	3.24192e+07	3.5471e+07	3.46967e+07	3.13775e+07	4.15037e+07	7.19227e+07	2.0526e+08
TRUE		C23 H38 N6 O4	Full match	No results	No results	No match	4.04	462.297	463.305	10.806	8	0		DDA for preferred ion	[M+H]+1	6.01694e+08	5.96845e+08	4.59725e+08	3.08854e+08	4.40834e+08	3.76058e+08	2.83947e+08	3.09128e+08	3.20002e+08	3.42671e+08	4.50489e+08	2.0708e+08	4.37135e+08	5.0737e+08	7.86685e+08	7.44775e+08	4.80126e+08	3.62797e+08	1.00803e+09	1.61119e+07	1.36058e+07	1.22497e+07	2.3118e+08	2.32889e+08	2.33776e+08	2.07284e+08	2.25873e+08	2.43084e+08	2.26731e+08	6.47374e+08	2.93072e+08	6.38438e+08	4.74472e+08	3.8885e+08
TRUE		C45 H81 N3 O5 P2	Full match	No results	No results	No match	-1.8	805.564	806.571	13.669	52	0		No MS2	[M+H]+1	951818	2.31224e+07	1.55124e+07	2.98561e+07	1.41072e+07	960877	2.06799e+07	2.2083e+07	2.24859e+07	2.50686e+07	3.69104e+06	2.62552e+07	2.40613e+07	1.84396e+07	2.10374e+07	1.69228e+06	3.33617e+07	2.79476e+07	1.92083e+07	751058	705368	735562	6.98732e+06	949164	1.78366e+06	842356	4.7338e+06	1.55747e+06	806207	2.49253e+07	1.36841e+06	3.65678e+07	1.4044e+07	1.56454e+07
TRUE		C32 H62 N3 O6 P	Full match	No results	No results	No results	-2.6	615.436	648.47	11.127	0	0		No MS2	[M+H+MeOH]+1	2.80021e+07	2.91104e+07	1.57584e+07	1.36811e+06	9.95142e+06	1.55235e+07	7.53976e+06	1.4713e+07	7.32784e+06	7.79032e+06	6.76775e+07	6.93305e+06	8.56026e+07	1.34423e+06	1.9947e+07	1.77668e+08	3.43884e+06	2.33269e+07	3.12958e+07	509458	533415	525130	3.51691e+06	9.94213e+06	3.23424e+06	3.02361e+06	4.47349e+06	3.83753e+06	1.02908e+07	2.07745e+07	2.33978e+07	9.83999e+07	2.1826e+07	2.9768e+07
TRUE	(3β,6β,15α,16β,25S)-6,8,15,16,26-Pentahydroxyergosta-4,24(28)-dien-3-yl 2-O-methyl-β-D-xylopyranoside	C34 H56 O10	Full match	No results	No results	Full match	-1.49	624.386	625.394	10.635	3	0		No MS2	[M+H]+1	5.88263e+07	2.30694e+07	3.2574e+07	9.07709e+06	8.30492e+06	3.02126e+07	4.81635e+06	1.6316e+07	1.01269e+07	3.63049e+07	1.36348e+08	6.97728e+07	1.52116e+08	1.92296e+07	3.4698e+07	3.57921e+08	7.50966e+06	2.50718e+07	6.03459e+07	2.75498e+06	413523	2.81924e+06	7.43613e+06	8.25101e+06	6.63675e+06	7.98867e+06	7.36743e+06	7.6944e+06	8.34466e+06	6.00384e+07	2.93222e+07	7.20976e+07	3.19795e+07	6.00975e+07
TRUE	N-PALMITOYLDIHYDROSPHINGOMYELIN	C39 H81 N2 O6 P	Full match	No results	No results	Full match	2.28	704.585	705.592	13.854	3	0		No MS2	[M+H]+1	1.19145e+06	3.07164e+08	3.4431e+08	1.97703e+08	3.06222e+08	1.1402e+06	5.65021e+08	3.32543e+08	1.00468e+09	3.43147e+08	1.16716e+06	2.81397e+08	5.77068e+08	3.83583e+08	9.50623e+08	1.06449e+06	2.37012e+08	2.22845e+08	1.62329e+08	815057	970758	1.09625e+06	1.70594e+08	1.15459e+06	1.107e+06	946299	966581	1.06989e+06	937482	1.5731e+08	1.07899e+06	3.27052e+08	2.28022e+08	2.18017e+08
TRUE		C31 H60 N2 O13	Full match	No results	No results	No results	4.63	668.413	669.42	10.59	0	0		No MS2	[M+H]+1	5.5225e+07	2.4752e+07	3.2688e+07	5.22633e+06	7.51855e+06	2.65938e+07	4.47603e+06	1.5472e+07	2.21093e+07	1.79924e+08	1.4356e+08	7.14219e+07	1.71587e+08	1.15509e+07	3.2538e+07	3.09481e+08	6.1568e+06	2.90025e+07	3.2256e+08	416442	541836	450964	6.46717e+06	7.58315e+06	6.33563e+06	7.2624e+06	6.71095e+06	6.51966e+06	6.9083e+06	5.95927e+07	2.56045e+07	7.14405e+07	1.77365e+07	6.28815e+07
TRUE		C50 H106 N7 O18 P3	Full match	No results	No results	No results	-0.27	1185.68	593.847	8.852	0	0		No MS2	[M+2H]+2	3.30511e+07	4.33736e+07	5.09416e+06	7.35195e+06	5.84683e+06	9.7211e+06	6.9268e+06	1.15205e+07	6.15283e+06	8.97973e+06	1.54243e+08	7.84365e+07	1.41361e+07	3.50625e+07	1.17976e+07	1.76124e+08	8.09577e+06	1.37176e+07	1.9531e+07	3.70457e+06	3.48818e+06	5.38682e+06	2.17283e+07	2.81316e+07	2.7245e+07	2.11695e+07	3.64018e+07	2.78143e+07	1.86912e+07	1.03836e+07	1.08086e+07	1.24754e+07	9.00763e+07	2.98771e+08
TRUE	[Similar to: 5-(hydroxymethyl)-4-methoxy-2,5-dihydrofuran-2-one; ΔMass: -41.9950 Da]	C8 H6	Full match	Invalid mass	No results	No results	2.94	102.047	103.055	1.771	0	2		DDA for preferred ion	[M+H]+1	4.7312e+08	4.43207e+08	8.37403e+08	2.00745e+08	2.3293e+08	1.8464e+08	1.65649e+08	6.07547e+08	6.14277e+08	3.66116e+08	6.81273e+07	1.22597e+08	4.26214e+07	1.61719e+08	1.03625e+08	1.0895e+08	8.64934e+07	1.27023e+08	6.3087e+07	2.57662e+06	2.63576e+06	2.47497e+06	3.46971e+07	4.43418e+07	3.95064e+07	2.94175e+07	4.36647e+07	3.56048e+07	3.42328e+07	1.79812e+08	8.8075e+08	9.43549e+07	8.02727e+08	2.99495e+08
TRUE		C39 H75 N9 O5 P2	Full match	No results	No results	No match	-1.47	811.535	812.543	13.014	22	0		No MS2	[M+H]+1	8.44389e+07	5.64817e+06	1.62768e+07	1.0416e+07	1.25312e+07	2.86652e+07	2.8821e+07	3.34278e+07	1.49901e+07	1.57176e+07	3.45828e+08	1.69327e+08	1.21342e+07	4.684e+07	4.05497e+07	4.65398e+07	6.86501e+07	2.93654e+07	5.80349e+07	416767	465364	428721	757570	1.93149e+06	8.01057e+06	3.49813e+06	2.51443e+06	4.58498e+06	1.01147e+07	4.87969e+07	3.51195e+07	2.08588e+07	9.67285e+08	2.95086e+08
TRUE		C17 H34 N6 O2	Full match	No results	No results	No match	2.68	354.275	355.283	11.022	9	0		DDA for preferred ion	[M+H]+1	1.45181e+08	2.41291e+08	2.20421e+08	4.55955e+08	4.31662e+08	5.104e+08	4.72092e+08	9.97258e+08	1.04169e+08	3.93256e+08	2.49192e+08	2.9997e+08	2.50236e+08	3.47205e+08	6.00461e+08	2.36617e+08	7.85341e+08	2.81997e+08	4.06123e+08	7.72172e+06	8.51999e+06	7.5425e+06	5.03301e+07	4.57827e+07	4.14075e+07	4.71251e+07	4.9945e+07	5.09253e+07	4.62131e+07	3.31505e+08	2.18209e+08	2.2485e+08	3.49915e+08	1.53127e+08
TRUE		C28 H57 N3 O6 P2	Full match	No results	No results	No match	-2.89	593.371	594.378	11.245	1	0		No MS2	[M+H]+1	3.97451e+07	1.63278e+06	1.13106e+07	913474	2.11947e+07	1.71207e+07	1.65619e+06	4.87257e+06	1.65824e+07	1.63756e+06	3.05727e+07	3.66688e+07	1.41233e+07	8.27387e+06	3.43676e+06	837773	9.02778e+06	4.80783e+06	1.35579e+06	437603	424681	388826	615349	601705	469290	720507	649517	500402	579673	2.15291e+07	1.42438e+07	1.11331e+06	8.36108e+08	3.82941e+08
TRUE		C25 H58 N9 O2 P3	Full match	No results	No results	No results	3.38	609.395	610.402	11.066	0	0		No MS2	[M+H]+1	7.49618e+07	3.08689e+07	4.48036e+07	5.59461e+06	1.5824e+07	4.0024e+07	1.05994e+07	2.10889e+07	3.29548e+07	1.59631e+07	1.67428e+08	8.36489e+07	2.6146e+08	1.40542e+07	7.88545e+07	5.40786e+08	1.31564e+07	3.30367e+07	1.19854e+08	622001	637352	649607	1.4978e+07	1.20747e+07	1.3e+07	8.37712e+06	1.04922e+07	1.34068e+07	1.3899e+07	7.28878e+07	2.3468e+07	1.21178e+08	4.62715e+07	7.87517e+07
TRUE	1-hexadecanoyl-2-(13Z-docosenoyl)-sn-glycero-3-phosphoethanolamine	C43 H84 N O8 P	Full match	No results	No results	Full match	1.81	773.595	774.602	13.831	54	0		No MS2	[M+H]+1	2.14161e+08	2.05523e+06	2.75768e+07	9.93246e+08	1.57565e+08	2.26915e+08	2.0918e+06	8.72887e+07	1.85322e+07	4.04669e+07	2.47186e+08	2.18002e+06	9.57074e+06	6.3142e+07	1.03234e+07	2.43455e+08	2.18234e+06	1.25438e+07	1.59018e+07	1.51273e+06	1.8017e+06	2.03462e+06	1.40323e+08	8.6126e+07	3.23092e+07	3.44198e+07	1.88e+07	6.16031e+07	3.32362e+07	1.69111e+07	2.39528e+08	2.13573e+06	1.20829e+08	4.50019e+07
TRUE		C39 H79 N9 O2 P2	Full match	No results	No results	No match	1.65	767.584	768.592	13.085	20	0		No MS2	[M+H]+1	5.65621e+07	3.92915e+06	1.11852e+08	8.52653e+07	1.94957e+08	1.12675e+08	2.55112e+06	1.15918e+08	1.27686e+08	1.533e+08	1.3163e+08	2.12707e+06	9.87635e+08	6.943e+08	6.77863e+08	1.41128e+08	3.9665e+06	5.58545e+08	7.29398e+08	1.11752e+06	1.02816e+06	992776	1.32629e+08	3.26048e+07	8.1988e+07	3.19916e+08	6.2495e+07	2.36919e+07	9.27172e+07	6.25702e+08	8.93661e+07	3.54535e+06	1.54199e+08	8.82113e+07
TRUE		C41 H87 P3 S	Full match	No results	No results	No match	2.72	704.576	768.592	13.147	1	0		No MS2	[M+ACN+Na]+1	9.00597e+07	4.67919e+06	1.11852e+08	8.52653e+07	1.94957e+08	1.12675e+08	2.55112e+06	1.15918e+08	1.27686e+08	1.533e+08	1.3163e+08	2.43719e+06	9.87635e+08	6.943e+08	6.77863e+08	1.41128e+08	3.9665e+06	5.58545e+08	7.29398e+08	1.07243e+06	1.12017e+06	1.12463e+06	1.32629e+08	3.26048e+07	8.1988e+07	3.19916e+08	6.2495e+07	2.36919e+07	7.3125e+07	6.25702e+08	8.93661e+07	3.54535e+06	9.80348e+07	8.82113e+07
TRUE		C36 H76 N6 O7	Full match	No results	No results	No match	-2.49	704.576	768.592	13.029	1	0		No MS2	[M+ACN+Na]+1	9.00597e+07	4.67919e+06	1.11852e+08	8.52653e+07	1.94957e+08	1.13323e+08	3.66517e+06	1.15918e+08	1.32243e+08	6.1047e+07	1.3163e+08	2.0498e+06	9.87635e+08	6.943e+08	6.77863e+08	1.41128e+08	3.9665e+06	5.58545e+08	7.34827e+08	1.22698e+06	1.12887e+06	1.10001e+06	1.32629e+08	3.26048e+07	8.1988e+07	3.19916e+08	6.2495e+07	2.36919e+07	1.21973e+08	6.25702e+08	8.93661e+07	3.54535e+06	1.54199e+08	8.82113e+07
TRUE		C41 H77 N9 O3 P2	Full match	No results	No results	No match	-1.04	805.562	806.569	11.297	52	0		No MS2	[M+H]+1	3.0049e+08	4.40456e+06	2.63181e+08	2.14259e+08	3.04081e+08	1.92242e+08	2.89221e+06	4.34895e+08	5.5647e+08	2.27371e+08	1.58754e+08	7.34097e+06	8.82227e+07	6.35978e+07	3.7377e+07	5.64688e+07	3.73487e+06	8.35209e+07	9.07054e+07	1.94765e+06	1.90627e+06	2.07869e+06	1.10939e+08	9.99597e+07	9.84666e+08	9.13636e+07	2.01208e+08	2.13642e+08	2.78651e+07	6.95179e+07	7.28705e+07	3.48034e+06	1.06059e+08	4.80585e+07
TRUE		C38 H64 N10 O4	Full match	No results	No results	No match	-0.6	724.511	723.503	8.823	1	0		DDA for preferred ion	[M-H]-1	4.30023e+08	3.80336e+08	4.10007e+08	3.60872e+08	5.33102e+08	8.71167e+08	5.24639e+08	5.84424e+08	5.38523e+08	3.37893e+08	8.40586e+08	6.2877e+08	7.76429e+08	5.14116e+08	6.02239e+08	4.84762e+08	5.72361e+08	5.90544e+08	9.84432e+08	27123.5	37835.5	38225.5	4.29176e+07	3.88447e+07	4.01908e+07	5.13648e+07	4.64032e+07	4.19488e+07	3.82144e+07	7.49567e+08	3.07605e+08	4.16133e+08	3.75153e+08	3.71735e+08
TRUE		C56 H81 N6 O2 P3	Full match	No results	No results	No results	-0.93	962.562	985.552	10.61	0	0		No MS2	[M+Na]+1	1.66337e+06	4.47509e+08	3.55571e+06	1.50184e+07	462456	1.50561e+06	1.20915e+07	2.74369e+08	4.66155e+08	568729	2.90273e+06	9.81279e+08	4.7689e+06	5.17011e+08	5.62643e+06	2.5838e+07	1.28088e+07	4.8139e+08	1.06718e+06	341477	329390	322907	1.88203e+07	2.16166e+07	2.05886e+07	2.17882e+07	2.12278e+07	2.44476e+07	2.95985e+07	2.15084e+07	4.1018e+08	635576	656972	684336
TRUE		C58 H82 O9 P2	Full match	No results	No results	No match	0.46	984.544	985.551	10.608	1	0		DDA for other ion	[M+H]+1	1.66337e+06	4.47509e+08	3.55571e+06	1.50184e+07	430851	1.50561e+06	1.20915e+07	2.74369e+08	4.66155e+08	529861	2.90273e+06	9.81279e+08	4.7689e+06	5.17011e+08	5.62643e+06	2.5838e+07	1.28088e+07	4.8139e+08	1.06718e+06	318140	306879	300839	1.88203e+07	2.16166e+07	2.05886e+07	2.17882e+07	2.12278e+07	2.44476e+07	2.95985e+07	2.15084e+07	4.1018e+08	635576	612073	637568
TRUE		C45 H80 N5 O3 P	Full match	No results	No results	No match	0.62	769.6	770.608	12.753	18	0		No MS2	[M+H]+1	4.05748e+06	1.36048e+07	1.61768e+06	1.90408e+06	2.04735e+06	1.65799e+06	9.80291e+06	1.75429e+06	1.70211e+06	1.80238e+06	2.08278e+06	1.57962e+07	1.44636e+06	3.81383e+06	1.61041e+06	2.14761e+06	1.72867e+06	1.68638e+06	1.73682e+06	1.35607e+06	1.329e+06	1.44728e+06	1.38624e+06	1.54297e+06	1.56215e+06	7.70512e+06	7.31018e+06	1.44691e+06	4.83706e+08	8.17247e+06	2.21102e+06	2.67683e+06	4.24202e+06	1.7982e+06
TRUE		C36 H69 N O11	Full match	No results	No results	No results	2.53	691.489	692.496	11.059	0	0		No MS2	[M+H]+1	8.2627e+07	1.89085e+07	4.4226e+07	3.55819e+06	1.06369e+07	4.15469e+07	1.35399e+07	1.47558e+07	2.83549e+07	9.26362e+06	6.54452e+07	5.76527e+07	2.0387e+08	8.75704e+06	4.40806e+07	3.02884e+08	7.58205e+06	2.07528e+07	1.51668e+08	604698	619622	631535	6.59518e+06	8.81137e+06	1.01107e+07	9.72906e+06	5.82528e+06	8.6769e+06	1.18666e+07	5.29131e+07	1.78748e+07	8.94014e+07	4.06106e+07	7.61565e+07
TRUE		C36 H69 N O11	Full match	No results	No results	No results	2.28	691.489	692.496	11.128	0	0		No MS2	[M+H]+1	2.60941e+07	1.03676e+07	1.55866e+07	1.60192e+06	3.79204e+06	1.38676e+07	2.29408e+06	3.7376e+06	7.51819e+06	4.35146e+06	6.54452e+07	8.17699e+06	8.78789e+07	5.1117e+06	1.58865e+07	1.63447e+08	2.07631e+06	6.93627e+06	2.47136e+07	498113	521537	513436	6.59518e+06	4.35895e+06	2.97785e+06	4.27184e+06	4.62365e+06	3.10347e+06	3.97482e+06	2.21255e+07	1.02327e+07	3.71052e+07	1.52802e+07	2.96294e+07
TRUE	DPPI	C41 H79 O13 P	No results	No results	No results	Full match	-2.81	810.524	811.531	13	10	0		No MS2	[M+H]+1	8.44389e+07	4.93537e+06	1.62768e+07	8.37083e+06	1.23256e+07	2.86652e+07	2.8821e+07	3.40815e+07	1.49901e+07	2.22856e+07	3.45828e+08	1.69327e+08	1.5982e+08	4.684e+07	4.01993e+07	4.65398e+07	6.86501e+07	2.93175e+07	5.80349e+07	506333	535121	532043	757570	2.43501e+06	3.92778e+06	3.22634e+06	2.16857e+06	4.00891e+06	6.21868e+06	4.85857e+07	3.75875e+07	1.95843e+07	9.67285e+08	3.00859e+08
TRUE		C29 H55 N O4	Full match	No results	No results	No results	1.77	481.414	482.421	10.484	0	0		DDA for preferred ion	[M+H]+1	6.2595e+08	1.50069e+08	1.79246e+08	2.4576e+08	1.07995e+08	6.24016e+07	1.71994e+08	1.43218e+08	2.42381e+08	1.07612e+08	3.28375e+07	1.12446e+07	1.56937e+07	3.21687e+07	6.55422e+06	4.4284e+06	6.00725e+07	5.85047e+06	6.5963e+06	195740	214712	223770	1.83185e+07	1.8551e+07	1.93533e+07	2.07384e+07	1.78893e+07	2.11539e+07	1.97176e+07	3.44042e+07	4.51744e+08	1.13588e+08	2.64027e+08	3.09504e+08
TRUE		C29 H57 N O5	Full match	No results	No results	No results	2.25	499.425	482.422	10.481	0	0		DDA for other ion	[M+H-H2O]+1	6.2595e+08	1.50069e+08	1.79246e+08	2.4576e+08	1.07995e+08	6.24016e+07	1.71994e+08	1.43218e+08	2.42381e+08	1.07612e+08	3.28375e+07	1.12446e+07	1.56937e+07	3.21687e+07	6.55422e+06	4.4284e+06	6.00725e+07	5.85047e+06	6.5963e+06	166072	182168	189854	1.83185e+07	1.8551e+07	1.93533e+07	2.07384e+07	1.78893e+07	2.11539e+07	1.97176e+07	3.44042e+07	4.37562e+08	1.13588e+08	2.64027e+08	3.09504e+08
TRUE		C35 H75 N9 O3 P2	Full match	No results	No results	No match	1.37	731.548	732.555	13.2	49	0		No MS2	[M+H]+1	4.87626e+06	2.65507e+07	9.68715e+08	1.0135e+08	2.89987e+07	7.49484e+06	5.99265e+06	9.58482e+06	7.21338e+06	3.63272e+07	1.97815e+07	2.28717e+06	1.67385e+07	3.2199e+06	1.10179e+07	4.60264e+06	3.59837e+06	1.06352e+07	2.84368e+06	1.00642e+06	1.03868e+06	1.0554e+06	4.75595e+07	1.58434e+06	1.45238e+07	1.52528e+06	3.005e+06	2.34305e+06	3.10956e+06	2.44666e+07	6.72644e+06	1.14177e+08	2.61696e+06	1.6412e+08
TRUE		C41 H83 N3 O4 P2	Full match	No results	No results	No match	-1.67	743.585	744.592	11.913	17	0		No MS2	[M+H]+1	1.63231e+06	2.00657e+06	1.77443e+07	3.32707e+07	2.96496e+06	1.33539e+06	1.68254e+06	2.55465e+07	2.21415e+07	1.7295e+06	1.79502e+06	1.92627e+06	1.85075e+06	2.34019e+07	1.10903e+07	7.5368e+06	1.92584e+06	6.61268e+07	8.01619e+06	1.09816e+06	1.13756e+06	1.08015e+06	1.27298e+06	5.29604e+06	1.15325e+07	1.38548e+06	2.56333e+06	9.6701e+06	5.19297e+08	1.5008e+06	1.39327e+07	1.5133e+06	7.97262e+07	3.89914e+06
TRUE		C49 H79 N2 O12 P	Full match	No results	No results	No results	-1.12	918.536	919.543	10.612	0	0		No MS2	[M+H]+1	459432	1.43886e+08	503409	2.11121e+06	389968	502018	2.20001e+06	7.79703e+07	1.58969e+08	479584	636098	9.67069e+08	2.73738e+06	1.99203e+08	1.19008e+06	5.10176e+06	1.83865e+06	1.6899e+08	473990	287953	277760	272293	2.7294e+06	3.61101e+06	3.49338e+06	2.91349e+06	3.37741e+06	4.12571e+06	4.58548e+06	5.71168e+06	1.15174e+08	382157	553995	854677
TRUE		C47 H80 N5 O3 P	Full match	No results	No results	No match	0.05	793.6	794.607	12.987	21	0		No MS2	[M+H]+1	2.18223e+08	3.86255e+07	5.68621e+08	2.6869e+08	4.3471e+08	2.01589e+08	3.57832e+06	8.43301e+08	7.19825e+08	9.61787e+08	2.69381e+08	2.65155e+06	5.26381e+08	8.20798e+08	4.25303e+08	2.76659e+08	2.79025e+07	9.49475e+08	2.23945e+08	1.0524e+06	965872	943494	1.08828e+08	2.68943e+08	4.12832e+08	2.80549e+08	7.00442e+08	5.91467e+08	1.39855e+08	3.73688e+08	4.26326e+08	9.15073e+06	9.40221e+08	5.69851e+08
TRUE		C47 H80 N5 O3 P	Full match	No results	No results	No match	-0.09	793.6	794.607	13.189	21	0		No MS2	[M+H]+1	1.08903e+08	5.48587e+06	3.76263e+08	1.6905e+08	3.69675e+08	1.14336e+08	3.57832e+06	5.08792e+08	7.19825e+08	9.61787e+08	1.04147e+08	2.65155e+06	2.15493e+08	8.20798e+08	4.25303e+08	6.09305e+07	3.54431e+06	2.95685e+08	2.94221e+08	991299	1.02307e+06	1.03955e+06	1.41401e+08	1.00153e+08	2.71169e+08	2.7227e+08	1.51647e+08	5.91467e+08	1.20763e+08	3.73642e+08	7.37949e+07	9.4853e+06	1.31097e+08	1.51353e+08
TRUE		C13 H30 N4 O6	Full match	No results	No results	No results	-0.4	338.216	694.467	12.562	0	0		DDA for other ion	[2M+NH4]+1	654293	601863	598236	627684	478728	588236	496607	982998	628762	615888	758573	688966	679585	487059	589029	730515	611721	669097	664561	468884	365268	378205	595507	417677	522269	461550	456154	459761	480646	556757	748901	628620	1.87621e+06	826394
TRUE		C89 H156 N10 O14 P2 S3	Full match	No results	No results	No results	0.74	1747.05	583.356	9.011	0	0		No MS2	[M+3H]+3	4.84552e+07	2.35398e+07	3.87902e+06	5.5151e+06	4.92554e+06	1.34134e+07	6.00468e+06	1.17415e+07	6.55975e+06	1.03801e+07	3.64676e+07	3.20921e+07	1.26018e+07	2.33814e+07	1.59544e+07	3.53969e+07	7.81617e+06	1.53106e+07	2.46233e+07	2.72701e+06	1.52625e+06	3.0196e+06	1.97201e+07	2.56492e+07	2.42765e+07	2.31597e+07	2.60724e+07	3.12379e+07	3.00608e+07	5.61806e+06	6.11846e+06	1.13645e+07	2.60011e+07	1.00251e+07
TRUE	5α-Stigmastan-3,6-dione	C29 H48 O2	Full match	No results	Partial match	Full match	1.92	428.366	429.374	14.797	30	0		DDA for preferred ion	[M+H]+1	1.15514e+08	6.56657e+07	1.0653e+07	2.62851e+07	3.22043e+06	4.13259e+07	7.44079e+07	4.58583e+07	3.95107e+07	3.67842e+07	6.73018e+08	3.05577e+08	1.80747e+08	4.14634e+08	8.4617e+07	4.16183e+08	5.31323e+08	2.85696e+08	5.78881e+08	185072	193749	214783	6.95655e+07	3.50954e+07	5.80395e+07	2.49777e+08	3.4158e+08	3.5745e+08	8.06558e+07	8.06627e+07	9.53684e+08	1.1466e+08	7.14238e+08	3.43354e+08
TRUE	Acetyl-L-carnitine	C9 H17 N O4	Full match	Full match	No results	Full match	1.94	203.116	204.123	1.03	6	1	93.4	DDA for preferred ion	[M+H]+1	6.72821e+08	2.94178e+08	2.47323e+08	3.98328e+08	3.71783e+08	5.25315e+08	2.87373e+08	6.1492e+08	3.9643e+08	6.29988e+08	2.45333e+08	3.09473e+08	1.28666e+08	1.09212e+08	1.23356e+08	7.65387e+07	1.50483e+08	9.76971e+07	2.35975e+08	33289.6	31038.3	27587.5	1.6182e+08	1.53144e+08	1.86253e+08	1.73899e+08	1.87587e+08	1.93283e+08	1.72267e+08	2.11849e+08	3.45262e+08	9.52661e+08	6.59201e+08	5.76071e+08
TRUE		C89 H150 N8 O14 P2 S3	Full match	No results	No results	No results	0.64	1712.99	572.005	9.009	0	0		DDA for other ion	[M+3H]+3	5.45022e+07	7.26278e+07	2.82494e+06	3.54414e+06	3.82166e+06	1.82043e+07	4.68872e+06	1.53005e+07	5.63406e+06	1.39327e+07	2.65568e+08	1.08514e+08	9.73997e+06	7.5966e+07	1.67823e+07	6.10877e+08	9.23526e+06	1.93226e+07	3.96275e+07	2.05532e+06	1.89714e+06	2.07383e+06	3.3035e+07	4.24759e+07	3.74565e+07	3.87804e+07	4.47866e+07	4.02438e+07	5.0429e+07	3.02106e+06	9.94638e+06	9.34939e+06	1.53954e+08	4.5095e+08
TRUE	N-pentadecanoylsphingosine-1-phosphocholine	C38 H77 N2 O6 P	Full match	No results	No results	Full match	1.93	688.553	689.561	11.184	4	0		No MS2	[M+H]+1	1.97504e+06	6.79514e+06	6.16164e+06	7.02308e+06	3.80364e+06	1.83041e+06	5.76001e+06	3.25103e+06	2.88791e+06	7.9389e+06	2.55995e+06	1.5036e+07	1.86105e+07	2.38666e+07	1.06638e+08	2.89569e+06	6.98081e+07	1.47735e+08	6.98458e+07	1.23298e+06	1.27708e+06	1.25724e+06	2.43178e+06	1.53515e+06	1.53279e+06	1.51542e+06	1.61642e+06	1.64871e+06	1.59454e+06	5.19772e+07	3.0895e+06	1.46005e+08	3.25493e+06	7.74709e+07
TRUE		C43 H87 N3 O4 P2	Full match	No results	No results	No match	0.69	771.618	794.607	12.998	15	0		No MS2	[M+Na]+1	2.18223e+08	3.86255e+07	5.68621e+08	2.6869e+08	4.3471e+08	2.01589e+08	3.57832e+06	8.43301e+08	2.85818e+08	5.47212e+08	1.84925e+08	2.65155e+06	5.26381e+08	8.20798e+08	3.83893e+08	2.86155e+08	2.79025e+07	9.49475e+08	2.23945e+08	654144	703662	687359	1.08828e+08	2.68943e+08	4.12832e+08	2.7227e+08	3.63584e+08	5.91467e+08	1.4492e+08	3.72737e+08	4.26326e+08	9.4853e+06	8.04373e+08	5.69851e+08
TRUE	5α-Stigmastan-3,6-dione	C29 H48 O2	Full match	No results	Partial match	Full match	2.54	428.367	429.374	14.835	30	0		DDA for preferred ion	[M+H]+1	1.15514e+08	6.56657e+07	1.0653e+07	2.62851e+07	3.22043e+06	4.13259e+07	5.10706e+07	4.58583e+07	3.93037e+07	3.67842e+07	6.73018e+08	2.51623e+08	2.61444e+08	5.48657e+08	1.09869e+08	7.60243e+08	6.79326e+08	2.85696e+08	7.51758e+08	219376	202716	208339	6.95655e+07	3.50954e+07	3.68149e+07	2.48737e+08	3.4158e+08	3.56269e+08	8.95995e+07	8.06627e+07	9.49087e+08	4.1251e+08	4.48416e+08	3.43354e+08
TRUE		C87 H146 N8 O13 P2 S3	Full match	No results	No results	No results	0.53	1668.97	557.329	9.003	0	0		DDA for other ion	[M+3H]+3	607704	1.1498e+08	3.71344e+06	4.15368e+06	4.91109e+06	1.91502e+07	6.74038e+06	2.07362e+07	7.42485e+06	1.67988e+07	2.79708e+08	1.06338e+08	9.74688e+06	1.08665e+08	1.93739e+07	5.75888e+08	7.34418e+06	2.40891e+07	4.3594e+07	2.40882e+06	3.66042e+06	3.47016e+06	4.89647e+07	5.8284e+07	5.51928e+07	5.18701e+07	5.2903e+07	422338	4.6331e+07	4.57418e+06	1.15847e+07	1.11661e+07	1.99848e+08	5.95567e+08
TRUE		C34 H52 N4 O6	Full match	No results	No results	No match	0.08	612.389	635.378	11.78	2	0		No MS2	[M+Na]+1	2.40073e+06	993106	1.87656e+06	749962	1.02094e+06	5.129e+06	573354	971766	861517	1.17459e+06	1.87925e+07	7.53923e+06	5.60085e+07	1.09233e+06	6.18368e+06	2.20302e+08	717343	1.14807e+06	1.20671e+06	466548	400943	446471	2.02716e+06	647671	2.17597e+06	784538	1.32265e+06	2.11804e+06	887378	2.22698e+07	762428	1.59673e+07	1.74984e+06	2.36717e+06
TRUE		C30 H54 N2 O12	Full match	No results	No results	No match	4.78	634.371	635.378	11.79	1	0		No MS2	[M+H]+1	2.40073e+06	883526	1.87656e+06	620779	1.02094e+06	5.129e+06	602184	1.03689e+06	671264	898006	1.87925e+07	7.53923e+06	5.60085e+07	617325	6.18368e+06	2.20302e+08	596051	849862	1.20671e+06	497813	400479	429852	2.02716e+06	647671	2.17597e+06	784538	1.32265e+06	2.11804e+06	887378	2.22698e+07	719476	1.59673e+07	826085	2.36717e+06
TRUE		C24 H52 N9 O3 P	Full match	No results	No results	No results	2.43	545.394	546.402	10.837	0	0		DDA for preferred ion	[M+H]+1	4.07604e+08	2.52669e+08	2.67252e+08	5.21177e+07	1.36948e+08	2.18416e+08	6.09649e+07	1.44517e+08	1.5849e+08	1.32757e+08	4.31916e+08	3.43301e+08	5.35491e+08	1.59335e+08	4.72673e+08	3.07419e+08	1.19678e+08	1.93683e+08	6.22459e+08	2.51691e+06	2.0014e+06	1.91994e+06	1.05292e+08	9.97687e+07	1.12632e+08	9.8088e+07	1.0474e+08	1.15691e+08	1.01504e+08	3.95139e+08	1.58938e+08	4.98561e+08	3.33418e+08	3.28413e+08
TRUE		C35 H56 N9 O2 P	Full match	No results	No results	No match	-2.55	665.428	666.435	11.563	5	0		No MS2	[M+H]+1	1.47093e+06	514747	451524	418891	2.03907e+06	1.30694e+06	473641	2.88424e+06	4.07084e+06	648105	4.00867e+07	1.92341e+07	3.23714e+06	3.39959e+06	931720	2.45124e+06	3.3061e+06	576803	569638	289665	306915	313827	338313	324851	337171	360794	345579	361577	412632	5.33095e+06	621192	781459	9.12482e+07	1.45017e+07
TRUE		C29 H48 N5 O3 P	Full match	No results	No results	No match	-0.45	545.349	546.356	11.267	2	0		No MS2	[M+H]+1	2.90492e+08	4.07727e+08	3.25265e+08	1.13819e+08	1.0633e+08	2.24575e+08	1.09462e+08	1.21774e+08	2.11109e+08	5.44044e+08	4.25864e+08	1.27264e+08	9.12268e+07	1.02291e+08	2.55205e+07	5.27807e+07	8.12855e+07	4.80414e+07	3.64082e+07	398870	387092	354410	1.82125e+07	1.67203e+07	1.43839e+07	1.99538e+07	1.62996e+07	1.80179e+07	1.74202e+07	3.52569e+08	9.46327e+08	3.45676e+08	4.42716e+08	5.78129e+08
TRUE		C24 H49 N4 O P S	Full match	No results	No results	No results	4.69	472.339	473.346	10.8	0	0		DDA for preferred ion	[M+H]+1	5.47743e+07	1.72537e+08	5.115e+07	2.5365e+08	1.58085e+08	2.20072e+08	2.50679e+08	9.44928e+08	9.02289e+07	3.11255e+08	6.37331e+07	1.97489e+08	8.2459e+07	2.84719e+08	2.61196e+08	5.75428e+07	4.23793e+08	1.05167e+08	5.86783e+07	3.44328e+06	4.00743e+07	2.33692e+06	2.07309e+07	2.12452e+07	2.09439e+07	1.99134e+07	1.88507e+07	2.40579e+07	2.08127e+07	1.12385e+08	1.26289e+08	6.68471e+07	8.16259e+07	4.21087e+07
TRUE		C36 H80 N9 P3 S	Full match	No results	No results	No results	0.44	763.547	764.555	11.578	0	0		No MS2	[M+H]+1	4.19903e+08	3.09351e+06	1.10161e+07	2.29874e+07	4.16052e+07	1.44072e+08	1.27007e+06	7.27247e+07	8.81449e+07	9.42205e+08	8.64571e+07	1.24001e+07	4.79789e+08	6.46619e+08	5.37622e+08	1.78175e+08	1.3487e+06	7.35775e+08	3.02031e+08	929825	873755	862490	8.74641e+07	4.85319e+06	1.53899e+07	1.05007e+06	1.064e+07	1.50778e+07	2.09117e+07	9.52241e+07	4.19558e+07	7.17619e+06	2.74108e+07	2.59934e+07
TRUE		C66 H106 N5 O14 P	Full match	No results	No results	No results	0.33	1223.75	612.881	8.872	0	0		DDA for other ion	[M+2H]+2	3.55174e+07	5.53904e+07	3.87126e+06	4.62233e+06	4.82925e+06	1.2878e+07	3.89962e+06	1.41261e+07	5.93675e+06	9.35116e+06	1.90054e+08	7.82612e+07	1.19591e+07	2.9419e+07	7.62496e+06	2.66673e+08	5.14128e+06	1.0696e+07	2.00296e+07	2.78005e+06	3.45425e+06	3.24123e+06	2.35362e+07	2.86195e+07	2.84429e+07	2.5801e+07	2.50178e+07	2.70174e+07	2.97139e+07	4.72035e+06	1.25623e+07	6.76795e+06	1.36386e+08	3.29036e+08
TRUE	(6S)-9-[(2S)-6-Hydroxy-2,5,7,8-tetramethyl-3,4-dihydro-2H-chromen-2-yl]-2,6-dimethylnonanoic acid	C24 H38 O4	Full match	No results	No results	Full match	1.89	390.278	413.267	12.978	63	0		DDA for other ion	[M+Na]+1	8.86889e+07	2.50927e+08	1.81744e+08	6.10902e+07	1.56104e+08	3.7557e+07	2.2461e+08	1.88945e+08	1.2968e+08	3.4836e+07	6.89988e+07	5.60171e+07	1.66007e+08	1.27836e+08	1.1867e+08	7.10566e+07	1.92263e+08	1.49351e+08	5.05578e+07	9.39781e+07	9.26826e+07	8.99772e+07	2.84143e+08	1.20433e+08	2.09908e+08	1.37813e+08	9.89155e+07	1.02033e+08	2.70559e+07	1.60825e+08	6.77956e+07	7.32959e+07	5.61766e+07	6.92253e+07
TRUE		C44 H60 O11	Full match	No results	No results	No results	-1.34	764.413	765.42	10.612	0	0		DDA for preferred ion	[M+H]+1	1.51164e+06	4.10356e+08	3.89994e+06	1.43225e+07	1.00781e+06	3.42054e+06	1.45101e+07	3.00367e+08	5.07729e+08	501885	4.282e+06	9.3627e+08	5.15611e+06	7.52463e+08	9.49775e+06	3.73258e+07	1.71123e+07	6.75649e+08	1.22898e+06	301343	290676	284955	2.70618e+07	3.23037e+07	2.94888e+07	2.72471e+07	2.80964e+07	3.39611e+07	3.95046e+07	3.17485e+07	3.25358e+08	1.00655e+06	1.74143e+06	3.6419e+06
TRUE		C47 H78 N5 O4 P	Full match	No results	No results	No match	0.49	807.58	808.587	13.86	55	0		No MS2	[M+H]+1	2.42353e+07	774879	2.51442e+07	1.7416e+07	2.52044e+07	3.83986e+07	788667	4.79977e+07	4.19796e+07	4.29948e+07	3.53621e+07	4.26315e+06	1.41589e+07	3.52819e+07	2.46299e+07	2.66068e+07	991623	2.76632e+07	6.9552e+07	570341	679294	767109	2.25542e+07	3.50047e+07	7.4413e+07	3.40777e+07	4.85473e+07	7.96702e+07	8.93769e+07	1.69553e+07	2.12496e+07	805232	4.10941e+07	1.32934e+07
TRUE		C23 H46 N6 O5	Full match	No results	No results	No results	2.81	486.354	487.362	11.259	0	0		DDA for preferred ion	[M+H]+1	2.81305e+08	4.37504e+08	6.90723e+07	6.45936e+07	1.04942e+08	7.44927e+07	7.08088e+07	8.61701e+08	5.83805e+07	7.22027e+07	3.52944e+08	4.79849e+08	1.11276e+08	9.34033e+08	1.0335e+08	5.04397e+08	4.74419e+08	1.96448e+08	1.14035e+08	5.70816e+07	1.22114e+08	1.05515e+08	1.26738e+08	1.15618e+08	1.15472e+08	1.43794e+08	5.65034e+07	1.14849e+08	1.28456e+08	8.71725e+07	2.71614e+08	2.18907e+08	9.66738e+07	1.45005e+08
TRUE	L-Pyroglutamic acid	C5 H7 N O3	Full match	Full match	Full match	Full match	2.39	129.043	130.05	0.978	9	2	9.6	DDA for preferred ion	[M+H]+1	4.98216e+08	1.86912e+08	1.98656e+08	5.65983e+08	4.22419e+08	9.29801e+08	2.69677e+08	3.58915e+08	4.29693e+08	3.97305e+08	7.62925e+07	1.43979e+08	1.0307e+08	1.57385e+08	1.3085e+08	1.67267e+08	1.75049e+08	1.27802e+08	1.22596e+08	1.44534e+06	951232	332054	2.11517e+08	1.47565e+08	1.54505e+08	2.08276e+08	1.64953e+08	1.90314e+08	2.52579e+08	2.07724e+08	1.02251e+08	4.43619e+08	2.10195e+08	1.72722e+08
TRUE		C38 H80 N8 O6 P2	Full match	No results	No results	No results	-0.78	806.567	807.574	13.033	0	0		No MS2	[M+H]+1	2.77294e+06	7.32504e+08	3.05483e+08	2.52568e+08	3.10505e+08	8.7632e+06	9.29505e+08	2.45773e+08	5.80556e+08	4.50836e+08	3.03206e+06	2.16123e+08	3.83852e+08	4.01676e+08	5.20487e+08	2.0995e+06	2.89938e+08	3.63535e+08	2.43079e+08	1.1017e+06	1.01361e+06	987688	2.39609e+07	3.39327e+06	1.65201e+07	2.21042e+06	2.29249e+06	8.07591e+06	1.27376e+06	2.04322e+08	3.07746e+06	8.25617e+08	2.13147e+08	7.45637e+08
TRUE	Aleuritic Acid	C16 H32 O5	Full match	No results	No results	Full match	1.83	304.226	303.218	8.977	6	0		DDA for preferred ion	[M-H]-1	311105	378983	243413	388079	338714	286057	2.01017e+08	372983	369898	314862	260619	302754	214432	323352	335128	287296	9.26967e+08	485281	270570	98484.5	61718.7	59271.5	1.15843e+07	8.50583e+06	9.03619e+06	5.53955e+06	8.21683e+06	9.84561e+06	9.05838e+06	498093	470573	450122	1.56237e+06	1.05877e+06
TRUE	(15R,21S)-18,21,22-Trihydroxy-3-methyl-18-oxido-12-oxo-13,17,19-trioxa-18λ~5~-phosphadocosan-15-yl 22-methyltricosanoate	C43 H85 O10 P	No results	No results	No results	Full match	-0.77	792.587	793.595	13.037	11	0		No MS2	[M+H]+1	2.18223e+08	1.23149e+07	5.68621e+08	2.69335e+08	4.3471e+08	2.01589e+08	4.767e+06	8.44773e+08	2.85818e+08	5.47212e+08	1.84925e+08	2.65155e+06	5.26381e+08	2.36259e+07	4.25742e+08	1.97085e+08	5.17298e+06	9.25689e+08	2.94221e+08	1.08211e+06	995587	970130	6.83325e+06	3.72003e+08	6.18319e+08	2.7227e+08	3.63584e+08	5.93246e+08	1.20763e+08	3.67996e+08	4.26326e+08	9.4853e+06	5.54036e+08	5.69851e+08
TRUE	1-[o-(Allyloxy)phenoxy]-3-(isopropylamino)-2-propanol	C15 H23 N O3	Full match	No results	No results	Full match	0.36	265.168	572.37	12.238	2	0		No MS2	[2M+ACN+H]+1	2.58212e+08	1.22054e+08	1.93053e+08	8.10756e+07	3.28229e+07	3.56135e+07	4.18227e+07	1.42868e+08	6.82869e+07	1.22091e+08	4.16469e+07	4.77812e+07	4.89589e+07	3.53964e+07	1.0913e+07	1.21579e+07	3.35925e+07	1.96941e+07	1.85417e+07	285711	261765	313056	3.22078e+06	2.88199e+06	3.47577e+06	2.42467e+06	3.07921e+06	3.78685e+06	3.99274e+06	8.02075e+07	9.23514e+08	8.92776e+07	4.35893e+08	3.20381e+08
TRUE		C41 H83 N3 O4 P2	Full match	No results	No results	No match	-1.62	743.585	744.592	11.766	17	0		No MS2	[M+H]+1	1.88528e+06	2.0548e+06	2.44762e+06	4.98713e+06	1.6118e+06	1.55237e+06	1.68254e+06	2.3862e+06	1.78253e+06	2.4303e+06	2.50631e+06	2.46197e+06	2.94862e+06	1.95964e+07	6.25119e+06	3.35311e+06	2.02924e+06	2.3428e+07	4.91833e+06	965316	929703	923776	1.11436e+06	1.09836e+06	1.00441e+06	1.04232e+06	1.06499e+06	992590	4.33531e+08	1.72947e+06	3.94271e+06	1.88661e+06	7.20848e+07	2.55047e+06
TRUE	glutaral	C5 H8 O2	Full match	No results	No results	Full match	2.68	100.053	133.086	8.928	22	0		No MS2	[M+H+MeOH]+1	6.672e+06	1.6761e+07	881372	1.23094e+06	774860	999268	815049	1.3732e+06	876143	4.3868e+06	3.76358e+07	1.71172e+07	5.60718e+06	6.37306e+06	1.33443e+06	1.02487e+08	1.31066e+06	930189	6.96069e+06	475016	266958	426856	2.77939e+06	3.94271e+06	2.93092e+06	4.94702e+06	5.78302e+06	4.28799e+06	4.03541e+06	5.48925e+06	1.36476e+06	1.34054e+06	2.56788e+07	1.15208e+08
TRUE	Maleamic acid	C4 H5 N O3	Full match	No results	Full match	Full match	3.25	115.027	148.061	0.985	1	0		DDA for preferred ion	[M+H+MeOH]+1	9.18224e+08	2.50404e+08	3.29034e+08	7.955e+08	6.98792e+08	5.86707e+08	3.014e+08	4.61472e+08	6.24471e+08	8.09796e+08	7.49829e+07	1.70106e+08	1.12912e+08	1.85011e+08	2.51184e+08	1.13967e+08	1.3921e+08	1.74761e+08	1.14019e+08	258374	307139	263850	1.51596e+08	1.62061e+08	1.6352e+08	1.31576e+08	1.44423e+08	1.5235e+08	1.39285e+08	2.29189e+08	1.77812e+08	4.05269e+08	3.06366e+08	3.083e+08
TRUE		C70 H114 N5 O16 P	Full match	No results	No results	No results	0.13	1311.8	656.907	8.899	0	0		No MS2	[M+2H]+2	4.16367e+07	6.50591e+07	3.93156e+06	5.48253e+06	4.85832e+06	1.28892e+07	3.33952e+06	1.17355e+07	6.28171e+06	1.27508e+07	2.12028e+08	7.8148e+07	8.26838e+06	3.66721e+07	7.51777e+06	3.33273e+08	6.83782e+06	9.74293e+06	1.89787e+07	1.75161e+06	198176	3.35429e+06	2.69672e+07	3.19784e+07	2.87308e+07	3.70323e+07	2.40076e+07	3.62872e+07	3.39944e+07	5.02513e+06	1.11642e+07	4.97969e+06	1.49702e+08	4.02282e+08
TRUE		C36 H79 N5 O13	Full match	No results	No results	No match	-1.53	789.566	790.573	11.746	7	0		No MS2	[M+H]+1	2.0082e+07	8.11617e+06	7.8548e+07	5.94192e+07	2.17979e+08	2.20567e+07	710948	9.75623e+07	7.5455e+07	6.4699e+07	3.93836e+07	4.9262e+06	4.40844e+08	9.15597e+08	6.92385e+08	1.07326e+08	1.33053e+07	8.08133e+08	5.61679e+08	564168	543355	539891	3.34773e+07	2.12063e+07	5.98068e+07	1.03705e+08	2.00026e+08	4.57338e+07	2.191e+08	4.04446e+08	7.71452e+07	1.3688e+07	2.08103e+08	1.02202e+08
TRUE		C39 H82 N7 O5 P S	Full match	No results	No results	No match	1.01	791.584	792.592	11.727	16	0		No MS2	[M+H]+1	3.49917e+07	8.052e+06	7.8548e+07	6.02547e+07	2.14798e+08	2.20567e+07	1.21051e+06	1.27957e+08	7.5455e+07	6.4699e+07	3.93836e+07	4.37578e+06	4.40844e+08	9.15597e+08	6.92385e+08	1.1125e+08	8.61778e+06	8.08133e+08	5.61679e+08	960595	925156	919258	2.97941e+07	1.83557e+07	5.709e+07	1.03705e+08	2.00026e+08	4.01686e+07	1.12735e+08	4.04446e+08	7.71452e+07	1.09363e+07	2.08103e+08	9.69862e+07
TRUE		C55 H63 O2 P	Full match	No results	No results	No results	0.79	786.457	787.465	10.613	0	0		No MS2	[M+H]+1	555358	1.20064e+08	504615	2.23749e+06	390903	503220	2.4799e+06	7.17577e+07	1.42528e+08	480733	1.10281e+06	9.11764e+08	3.40795e+06	2.20533e+08	850454	6.73374e+06	2.071e+06	1.87041e+08	876832	288643	278425	272946	2.75382e+06	2.71676e+06	2.65666e+06	3.06351e+06	3.14598e+06	3.91078e+06	3.91697e+06	7.8509e+06	9.19756e+07	383073	555322	578453
TRUE		C37 H75 N9 O4 P2	Full match	No results	No results	No match	1.37	771.543	772.55	14.276	5	0		No MS2	[M+H]+1	3.08297e+07	3.12146e+06	2.20042e+06	1.24138e+06	7.25965e+06	7.81971e+06	4.0438e+06	6.37455e+06	7.75472e+06	3.0984e+06	1.37605e+08	8.43744e+07	3.43621e+07	1.83659e+07	9.42068e+06	2.83536e+07	2.29505e+07	4.50772e+06	1.17423e+07	746643	675026	865043	796768	863841	787248	780381	778747	890445	914432	1.61557e+07	9.25095e+06	4.82262e+06	3.01947e+08	6.64623e+07
TRUE		C47 H78 N5 O4 P	Full match	No results	No results	No match	-1	807.578	808.585	14.365	55	0		No MS2	[M+H]+1	2.30207e+08	4.63184e+07	1.19691e+08	1.82695e+08	1.40087e+08	2.23937e+08	7.21874e+07	3.09038e+08	1.2421e+08	3.29348e+08	1.39012e+08	3.34179e+07	9.15613e+07	1.19573e+08	1.29662e+08	6.39343e+07	2.70875e+07	1.2697e+08	6.20362e+07	996136	847859	1.10376e+06	1.11167e+08	1.13517e+08	1.58797e+08	1.60144e+08	1.59706e+08	2.20872e+08	2.03783e+07	9.06231e+07	8.96907e+07	5.07031e+07	1.05909e+08	1.09426e+08
TRUE		C35 H73 N3 O5 P2	Full match	No results	No results	No match	-2.27	677.501	678.508	10.155	32	0		No MS2	[M+H]+1	4.1475e+06	1.01599e+08	1.39711e+07	2.6833e+08	2.39898e+08	4.80902e+06	5.66602e+07	7.20942e+07	4.0681e+07	7.80824e+07	7.0302e+06	6.04458e+07	9.75682e+06	1.9974e+07	4.2633e+07	6.64042e+06	1.17256e+08	2.66194e+07	1.74981e+07	7.87156e+06	5.47045e+06	1.37004e+07	3.47499e+07	8.61801e+06	4.32206e+06	5.59e+06	9.54595e+06	5.16427e+06	4.87142e+06	5.03499e+07	5.49023e+06	4.20671e+08	6.07049e+06	2.04581e+08
TRUE		C8 H19 N6 O3 P	Full match	No results	No results	No results	-2.69	278.125	279.132	8.291	0	0		DDA for preferred ion	[M+H]+1	2.9594e+06	3.17167e+06	3.44707e+06	7.61521e+06	9.03255e+08	2.04911e+06	1.08423e+06	2.13231e+06	1.69727e+07	2.45612e+06	1.76815e+06	1.9723e+06	3.19259e+07	4.30032e+06	1.31498e+06	2.25616e+06	1.49393e+06	1.35268e+06	3.69612e+06	133321	97338.9	115186	4.92245e+06	5.35474e+06	3.32811e+06	4.18788e+06	9.8766e+06	6.03116e+06	4.54138e+06	1.58245e+06	2.71975e+07	1.31144e+06	3.70577e+06	3.91572e+06
TRUE	(2S)-1-{[11-(3,4-Dimethyl-5-propyl-2-furyl)undecanoyl]oxy}-3-hydroxy-2-propanyl 13-(3-methyl-5-pentyl-2-furyl)tridecanoate	C46 H78 O7	No results	No results	No results	Full match	-3.53	742.572	743.579	11.69	9	0		No MS2	[M+H]+1	3.0213e+08	1.48122e+06	1.77402e+08	4.79311e+07	1.19551e+08	2.52225e+08	821255	6.28487e+06	1.5019e+08	8.40115e+08	3.35511e+08	1.51651e+06	8.91485e+08	3.48684e+08	9.00195e+08	9.07114e+07	1.36997e+06	5.95669e+08	6.70075e+08	586574	627659	560362	9.50081e+07	1.32704e+07	5.7444e+07	6.89121e+08	1.14717e+08	1.71956e+07	2.14584e+07	7.37114e+08	3.53956e+08	1.40351e+06	1.47221e+07	1.63396e+08
TRUE		C38 H82 N3 O3 P3 S2	Full match	No results	No results	No match	-1.72	785.5	786.507	11.047	14	0		No MS2	[M+H]+1	7.69121e+07	3.67621e+07	5.61897e+07	3.13133e+06	1.06942e+07	4.39844e+07	6.71345e+06	2.03261e+07	5.5325e+07	1.28391e+07	2.32246e+08	1.39115e+08	2.8708e+08	9.39727e+06	4.24783e+07	4.5256e+08	7.9108e+06	5.54584e+07	8.07535e+07	606995	620241	632167	1.08734e+07	1.1429e+07	9.34487e+06	1.11277e+07	1.14121e+07	1.13862e+07	1.13013e+07	4.96566e+07	4.24492e+07	9.79875e+07	4.16782e+07	8.99487e+07
TRUE		C45 H78 N2 O5 P2	Full match	No results	No results	No results	-1.99	788.537	789.548	13.154	0	0		No MS2	[M+H]+1	3.80745e+07	1.4369e+06	1.98125e+06	2.04203e+06	1.42932e+06	1.85769e+07	1.85981e+07	5.66331e+06	1.4516e+06	1.57812e+06	2.46648e+08	1.95275e+08	4.06427e+07	3.86875e+06	2.52317e+06	3.30917e+07	7.9222e+07	2.75941e+06	4.77473e+06	732836	720467	768505	1.46782e+06	1.02797e+06	8.43718e+06	1.05289e+06	1.05115e+06	931121	5.80001e+07	8.78799e+06	1.25128e+07	1.5435e+07	5.81294e+08	1.65941e+08
TRUE		C27 H44 N6 O	Full match	No results	No results	No match	2.66	468.359	469.366	11.746	12	0		DDA for other ion	[M+H]+1	1.43919e+06	1.88043e+08	2.17148e+08	1.13845e+07	1.17527e+08	1.18505e+06	4.31517e+07	1.76135e+08	2.81158e+08	6.73626e+07	1.91327e+06	3.16804e+08	1.98003e+08	2.04245e+08	4.06719e+08	1.38769e+06	3.52275e+08	8.68847e+08	1.62546e+08	736905	709719	705194	5.61419e+07	838468	766748	795690	785484	752258	928519	8.89595e+08	1.75935e+06	3.37177e+08	1.07556e+08	1.80383e+08
TRUE	[Similar to: 4-[(1S,3aR,4S,6aR)-4-(4-hydroxy-3-methoxyphenyl)-hexahydrofuro[3,4-c]furan-1-yl]-2-methoxyphenol; ΔMass: 22.1494 Da]	C19 H36 N6 O2	Full match	Invalid mass	No results	No match	2.7	380.291	381.298	12.069	15	1		DDA for preferred ion	[M+H]+1	1.04338e+08	6.82296e+07	6.86009e+07	5.94032e+07	2.70059e+07	1.37869e+08	1.3177e+08	6.98192e+07	1.16211e+08	6.93523e+07	1.61569e+08	2.42134e+08	1.68844e+08	1.07158e+08	3.18833e+08	2.54844e+08	2.36743e+08	4.75609e+08	2.45073e+08	5.56798e+06	6.73285e+06	6.12712e+06	1.09699e+08	1.09535e+08	8.084e+07	1.39141e+08	9.33451e+07	7.58498e+07	4.03418e+07	1.24635e+08	1.70399e+08	7.46302e+07	7.70687e+07	9.82951e+07
TRUE		C18 H32 N6 O	Full match	No results	No results	No match	3.24	348.265	381.298	12.068	8	0		DDA for other ion	[M+H+MeOH]+1	1.04338e+08	6.82296e+07	6.86009e+07	5.94032e+07	3.10904e+06	1.37869e+08	1.3177e+08	6.98192e+07	1.16211e+08	6.93523e+07	1.61569e+08	2.42134e+08	1.68844e+08	1.07158e+08	3.18833e+08	2.54844e+08	2.36743e+08	4.75609e+08	2.45073e+08	5.5452e+06	6.82695e+06	6.13645e+06	1.09699e+08	1.09535e+08	8.084e+07	1.39141e+08	9.33451e+07	7.58498e+07	4.03418e+07	1.24635e+08	1.70399e+08	7.46302e+07	7.70687e+07	9.82951e+07
TRUE		C45 H63 N2 O6 P	Full match	No results	No results	No match	-1.98	758.441	781.43	11.184	1	0		No MS2	[M+Na]+1	458325	9.78591e+07	381332	2.78183e+06	387701	1.35039e+06	3.91939e+06	7.92663e+07	3.5434e+08	360874	991035	8.87496e+08	1.62104e+06	4.175e+08	3.3857e+06	1.0865e+07	8.06564e+06	4.74574e+08	860812	299068	305841	275938	1.17345e+07	1.47612e+07	1.26148e+07	1.0612e+07	1.06119e+07	1.40469e+07	1.1616e+07	1.26536e+07	1.83243e+08	407542	531297	554944
TRUE		C45 H52 N10 O3	Full match	No results	No results	No results	0.96	780.423	781.43	11.169	0	0		No MS2	[M+H]+1	569888	9.78591e+07	552002	2.78183e+06	524132	1.35039e+06	3.91939e+06	7.92663e+07	3.5434e+08	521348	991035	8.87496e+08	1.62104e+06	4.175e+08	3.3857e+06	1.0865e+07	8.06564e+06	4.74574e+08	860812	370243	383486	349582	1.17345e+07	1.47612e+07	1.26148e+07	1.0612e+07	1.06119e+07	1.40469e+07	1.1616e+07	1.26536e+07	1.83243e+08	628097	657740	650472
TRUE	1-(1Z-octadecenyl)-2-oleoyl-sn-glycero-3-phosphoserine	C42 H80 N O9 P	Full match	No results	No results	Full match	1.82	773.558	774.566	14.021	5	0		No MS2	[M+H]+1	2.41237e+06	1.58755e+06	900092	616596	656803	1.78824e+06	1.58659e+06	1.03747e+06	1.19777e+06	771814	6.55691e+06	3.05824e+06	3.46976e+06	4.13833e+06	1.09034e+06	2.56764e+06	2.47567e+06	616718	963683	702380	541779	496359	551921	565445	617538	558610	532128	522633	572674	2.39334e+06	2.89737e+06	881219	2.64071e+07	6.6502e+06
TRUE		C83 H158 N10 O17 P2 S4	Full match	No results	No results	No results	0.75	1757.02	586.68	9.021	0	0		DDA for other ion	[M+3H]+3	3.63456e+07	6.26604e+07	1.78844e+06	2.36601e+06	2.74801e+06	1.17539e+07	2.99387e+06	1.04945e+07	4.49319e+06	1.1784e+07	2.01076e+08	7.70443e+07	5.81475e+06	5.70265e+07	1.81486e+07	4.59707e+08	5.22392e+06	1.38826e+07	3.06596e+07	1.94795e+06	1.39635e+06	2.07265e+06	3.60723e+07	3.46606e+07	3.13532e+07	2.19283e+07	3.66678e+07	3.11115e+07	3.22869e+07	1.93774e+06	6.84409e+06	6.17622e+06	1.3644e+08	4.18902e+08
TRUE		C42 H79 N5 O7 P2	Full match	No results	No results	No match	-0.01	827.545	828.553	13.046	26	0		No MS2	[M+H]+1	880863	7.99358e+08	2.51484e+08	3.69402e+08	1.37701e+08	525220	1.16802e+08	2.14879e+08	2.29787e+08	3.40712e+08	758136	3.10755e+07	3.906e+08	3.0922e+08	5.62484e+08	880548	3.44755e+08	3.95157e+08	1.41851e+08	462060	382747	410484	2.56753e+07	483693	457552	592666	573292	547462	534223	1.6344e+08	796259	5.30779e+08	1.83985e+08	8.83118e+08
TRUE		C43 H72 N8 O3 P2	Full match	No results	No results	No results	-1.7	810.519	828.553	13.047	0	0		No MS2	[M+NH4]+1	290806	5.22011e+08	2.51484e+08	2.90778e+08	1.11704e+08	173395	1.16802e+08	1.55196e+08	2.62802e+08	3.1031e+08	250289	1.56429e+08	3.906e+08	2.73746e+08	5.62484e+08	290702	3.44755e+08	3.95157e+08	1.41851e+08	123185	126195	126718	2.56753e+07	159685	121998	195661	408050	180738	150539	1.5239e+08	262875	5.30779e+08	1.21977e+08	8.83118e+08
TRUE		C17 H38 N2 O7	Full match	No results	No results	No results	2.03	382.269	828.553	13.03	0	0		No MS2	[2M+ACN+Na]+1	595121	7.99358e+08	2.51484e+08	3.69402e+08	1.37701e+08	354845	1.16802e+08	2.14879e+08	2.29787e+08	3.40712e+08	512205	1.4404e+08	3.906e+08	2.73746e+08	5.62484e+08	594909	3.44755e+08	3.95157e+08	1.41851e+08	252092	258251	259323	2.56753e+07	326789	249663	400412	408050	369872	308072	1.6344e+08	537962	5.30779e+08	1.83985e+08	8.83118e+08
TRUE		C39 H80 N3 O7 P3	Full match	No results	No results	No match	-2.36	795.519	828.553	13.024	1	0		No MS2	[M+H+MeOH]+1	1.61157e+06	7.99358e+08	2.51484e+08	3.69402e+08	1.37701e+08	1.31126e+06	4.2545e+08	2.14879e+08	3.16112e+08	4.59383e+08	1.53171e+06	1.75115e+08	3.906e+08	2.73746e+08	5.62484e+08	1.61099e+06	3.44755e+08	3.95157e+08	1.87767e+08	845352	762257	757872	2.56753e+07	1.05345e+06	1.14218e+06	1.12599e+06	1.09147e+06	1.0016e+06	977377	1.6344e+08	1.79416e+06	5.30779e+08	1.83985e+08	8.83118e+08
TRUE		C23 H49 N9 O5	Full match	No results	No results	No results	-3.56	531.384	532.391	11.073	0	0		No MS2	[M+H]+1	3.54993e+07	3.05634e+08	4.16845e+07	6.95805e+07	5.63259e+07	1.51157e+08	1.35348e+08	8.81323e+08	2.03726e+07	9.61428e+07	7.06645e+07	2.37753e+08	8.44552e+07	1.44364e+08	2.25291e+08	9.58012e+07	2.54486e+08	1.09488e+08	4.76063e+07	1.49702e+06	3.90753e+07	1.87705e+06	1.57742e+07	1.49247e+07	1.47038e+07	1.51285e+07	1.67749e+07	1.61531e+07	1.6709e+07	2.26834e+08	2.95748e+08	1.47264e+08	6.31238e+07	2.71775e+07
TRUE	1H-Indol-3-ylamine	C8 H8 N2	Full match	No results	No results	Full match	2.81	132.069	133.076	4.506	3	0		DDA for preferred ion	[M+H]+1	2.9859e+08	2.59037e+08	2.98958e+08	5.24187e+08	3.80889e+08	5.03591e+08	4.62741e+08	6.30162e+08	2.14427e+08	7.03799e+08	6.1981e+08	5.76984e+08	5.63403e+08	8.80447e+08	5.37857e+08	5.96732e+08	6.34979e+08	5.45275e+08	4.41576e+08	745316	713420	516314	1.94386e+07	2.99888e+07	3.49369e+07	4.18303e+07	5.14067e+07	4.52251e+07	4.94941e+07	2.94295e+08	2.90415e+08	3.11167e+08	4.72399e+08	2.34399e+08
TRUE		C43 H69 N3 O6	Full match	No results	No results	No results	-3.76	723.516	802.537	12.219	0	0		No MS2	[M+DMSO+H]+1	942906	1.90068e+08	2.386e+08	2.14806e+08	9.16453e+07	460903	2.82353e+07	1.29545e+08	8.3902e+07	2.31063e+08	709382	7.24844e+07	1.59558e+08	1.29086e+08	1.66164e+08	573104	3.19266e+07	1.05353e+08	5.85658e+07	388673	349321	397455	1.26474e+07	407648	545126	397858	418221	490896	443298	3.81089e+07	1.05079e+06	2.54211e+08	9.26595e+07	3.09115e+08
TRUE		C19 H32 N6 O3	Full match	No results	No results	No results	-4.48	392.252	802.537	12.247	0	0		No MS2	[2M+NH4]+1	804079	2.01521e+08	2.386e+08	2.14806e+08	9.16453e+07	637943	2.82353e+07	1.29545e+08	8.3902e+07	2.31063e+08	772548	7.24844e+07	1.59558e+08	1.29086e+08	1.66164e+08	624846	3.19266e+07	1.05353e+08	5.85658e+07	304851	279300	334027	1.26474e+07	542773	577136	334365	451299	587276	707640	3.81089e+07	1.05079e+06	2.54211e+08	9.26595e+07	3.09115e+08
TRUE		C34 H78 N9 O6 P3	Full match	No results	No results	No match	1.26	801.53	802.537	12.248	28	0		No MS2	[M+H]+1	1.05003e+06	2.16553e+08	2.386e+08	2.14806e+08	9.16453e+07	833078	6.41487e+07	1.29545e+08	8.3902e+07	2.31063e+08	1.00886e+06	7.24844e+07	1.59558e+08	1.29086e+08	1.66164e+08	815976	3.19266e+07	1.05353e+08	5.85658e+07	398099	364734	436200	1.26474e+07	708798	753673	436642	589344	766914	924095	3.81089e+07	1.06367e+06	2.54211e+08	9.26595e+07	3.09115e+08
TRUE		C50 H78 N O P3	Full match	No results	No results	No match	-0.15	801.529	802.537	12.053	28	0		No MS2	[M+H]+1	1.63951e+06	4.17927e+07	2.08109e+07	3.54631e+06	9.82467e+06	1.25385e+06	1.50143e+07	1.41424e+07	2.33111e+07	1.57888e+07	1.73227e+06	4.07706e+07	2.94457e+07	3.8573e+07	8.17995e+07	1.30352e+06	2.67238e+07	5.4934e+07	3.9161e+07	497972	481655	515977	3.41014e+06	1.01036e+06	1.23897e+06	1.15159e+06	853700	1.04956e+06	891802	1.76028e+07	1.73844e+06	7.03288e+07	1.29395e+07	3.09115e+08
TRUE		C45 H78 N5 O3 P	Full match	No results	No results	No match	-0.22	767.584	768.591	11.531	20	0		No MS2	[M+H]+1	9.8012e+06	2.77825e+07	3.00587e+06	8.48871e+07	3.82915e+07	2.60375e+06	2.64181e+07	8.73049e+06	5.98325e+07	6.10921e+07	2.91504e+06	8.42139e+06	2.96698e+06	1.41126e+07	2.58677e+07	3.4576e+06	1.32111e+07	4.14642e+06	2.24403e+07	1.76233e+06	1.65606e+06	1.63471e+06	2.21759e+06	2.64742e+07	3.07072e+07	1.23878e+07	1.11868e+07	3.71752e+06	8.20054e+08	1.09402e+07	3.26588e+06	9.34134e+06	4.15311e+06	8.70818e+06
TRUE		C41 H85 N10 O14 P	Full match	No results	No results	No results	0.26	972.599	487.307	6.89	0	0		DDA for other ion	[M+2H]+2	1.99793e+08	4.39706e+08	9.72673e+07	3.80404e+07	6.72901e+07	8.86373e+07	2.31337e+07	1.93506e+08	1.03463e+08	3.98841e+08	7.51952e+06	2.82238e+06	314776	2.57188e+07	1.19066e+07	1.29338e+07	1.86811e+06	1.58233e+07	8.57404e+06	79654.4	96325.9	95159.3	2.20674e+06	5.83427e+06	2.70809e+06	4.18492e+06	3.82128e+06	4.87978e+06	2.0568e+06	8.60296e+06	8.76789e+08	838001	2.46001e+08	4.39456e+08
TRUE	Escitalopram	C20 H21 F N2 O	No match	Full match	No results	Full match	1.94	324.164	325.172	8.413	2	4	98.4	DDA for preferred ion	[M+H]+1	8.76737e+08	868556	917466	784948	627583	670306	368388	581199	589605	808365	8.0361e+08	1.15379e+06	273000	709216	519460	936410	538855	469345	343648	49750.9	48111.5	46608.7	6.62896e+06	6.81064e+06	5.66902e+06	5.26898e+06	6.07846e+06	4.999e+06	4.94526e+06	3.42959e+07	1.30003e+06	346259	1.2265e+06	1.18156e+06
TRUE	12-oxo Phytodienoic Acid	C18 H28 O3	Full match	No results	Partial match	Full match	2.03	292.204	293.212	9.899	32	0		No MS2	[M+H]+1	1.46218e+07	793076	715369	529454	1.26176e+06	577982	1.83753e+06	4.45139e+06	1.70069e+06	493496	1.01621e+07	4.80729e+07	5.50532e+07	5.55093e+06	1.5589e+06	9.12721e+06	7.78916e+06	5.3042e+06	1.62687e+07	370316	336050	259601	406389	369325	319339	386538	362263	331488	455643	1.47941e+07	3.4502e+06	781716	3.98244e+08	6.40676e+07
TRUE	D-PANTOTHENIC ACID	C9 H17 N O5	Full match	No results	Full match	Full match	1.93	219.111	220.118	1.352	4	0		DDA for preferred ion	[M+H]+1	1.92673e+08	3.06909e+08	1.55172e+08	1.79933e+07	8.65843e+07	3.87785e+07	2.34982e+07	5.3221e+07	4.27133e+07	1.4876e+08	2.06174e+07	2.16712e+07	1.0669e+07	9.65649e+06	1.20852e+07	4.70833e+06	1.40515e+07	9.58807e+06	1.19259e+07	1.58136e+06	1.71893e+06	619756	6.33252e+06	4.71019e+06	5.85192e+06	8.94912e+06	4.93148e+06	6.92117e+06	8.73768e+06	2.26047e+07	4.936e+08	2.88145e+07	3.20626e+08	2.95829e+08
TRUE		C38 H81 N5 O7 P2	Full match	No results	No results	No match	-0.68	781.561	782.568	12.867	62	0		No MS2	[M+H]+1	2.97801e+08	2.81052e+06	2.54163e+08	3.01256e+08	1.31268e+08	4.74907e+08	2.71884e+06	4.5159e+08	3.20748e+08	5.22212e+08	2.4425e+08	7.05074e+06	1.43541e+08	1.51546e+08	9.94752e+07	8.61751e+07	2.89136e+06	1.695e+08	1.39066e+08	760929	806137	713805	2.01181e+08	8.73556e+08	5.44719e+08	1.80728e+08	2.03743e+08	4.35439e+08	6.31802e+07	1.60011e+08	2.76334e+08	3.43732e+06	1.76479e+08	1.65375e+08
TRUE		C22 H47 N9 O2 P2	Full match	No results	No results	No match	-3.13	531.331	532.338	11.696	1	0		No MS2	[M+H]+1	1.63865e+08	8.73519e+08	1.86186e+08	3.69392e+07	2.93987e+07	2.00565e+07	2.75282e+07	1.21417e+08	8.04903e+07	1.01009e+08	6.74601e+07	4.37786e+07	1.51195e+07	3.36633e+07	1.77466e+07	2.22557e+07	3.90816e+07	3.776e+07	1.85816e+07	414014	443012	395513	5.08337e+06	4.54888e+06	4.17765e+06	4.69976e+06	4.76967e+06	4.66895e+06	4.76336e+06	9.83405e+07	3.60808e+08	1.01203e+08	2.08152e+08	2.77776e+08
TRUE	N-[(9Z)-3-Hydroxy-9-octadecenoyl]glycine	C20 H37 N O4	Full match	No results	No results	Full match	1.83	355.273	356.28	9.264	1	0		DDA for other ion	[M+H]+1	6.38775e+06	1.36711e+07	6.8591e+06	1.43818e+07	8.72406e+08	2.6264e+06	4.8267e+06	7.2436e+06	1.50189e+07	3.77305e+06	3.51052e+06	2.8897e+07	371123	2.92639e+07	3.39426e+06	6.83087e+06	2.96196e+06	1.36391e+06	3.84748e+06	167703	177896	145340	4.59551e+06	3.66791e+06	4.49612e+06	4.90235e+06	5.1402e+06	4.0984e+06	3.99825e+06	2.62738e+07	1.33609e+08	6.79303e+06	4.9152e+07	8.05151e+07
TRUE		C36 H63 N6 O5 P	Full match	No results	No results	No match	-4.4	690.457	713.446	10.655	1	0		No MS2	[M+Na]+1	4.5876e+07	2.51922e+07	3.09308e+07	3.98714e+06	8.37241e+06	2.49492e+07	5.13643e+06	1.4696e+07	2.55546e+07	1.9284e+07	1.2311e+08	8.28855e+07	1.52726e+08	9.46536e+06	2.07454e+07	2.63327e+08	5.99842e+06	2.94763e+07	4.22322e+07	430335	695501	406933	6.52496e+06	5.31277e+06	8.26902e+06	5.2076e+06	5.63826e+06	6.34264e+06	9.89215e+06	4.8264e+07	2.48658e+07	5.57827e+07	2.57364e+07	6.04289e+07
TRUE		C38 H70 N2 O2 P2 S2	Full match	No results	No results	No results	4.8	712.439	713.446	10.637	0	0		No MS2	[M+H]+1	4.5876e+07	2.51922e+07	3.09308e+07	3.98714e+06	8.37241e+06	2.49492e+07	5.13643e+06	1.4696e+07	2.55546e+07	1.39662e+08	1.2311e+08	8.28855e+07	1.52726e+08	9.46536e+06	2.07454e+07	2.63327e+08	5.99842e+06	2.94763e+07	4.22322e+07	419621	535552	396802	6.52496e+06	5.31277e+06	8.26902e+06	5.2076e+06	5.63826e+06	6.34264e+06	9.89215e+06	4.8264e+07	2.48658e+07	5.57827e+07	2.18443e+07	6.04289e+07
TRUE	Cholestenone	C27 H44 O	Full match	No results	Not the top hit	Full match	1.92	384.34	407.329	13.191	43	0		No MS2	[M+Na]+1	1.53968e+06	8.52221e+07	5.26832e+07	1.04615e+07	6.13895e+07	1.0724e+06	1.37265e+08	2.55121e+07	3.37767e+08	1.32189e+08	1.69339e+06	2.60573e+08	2.61196e+08	2.80636e+08	8.71929e+08	1.3822e+06	4.31162e+08	5.2087e+08	3.03802e+08	466857	426584	489580	4.61854e+07	654874	662012	670749	669637	593175	805717	2.05727e+08	1.20622e+06	2.1458e+08	6.33419e+07	1.0946e+08
TRUE		C29 H54 N6 P2 S	Full match	No results	No results	No match	-0.97	580.36	581.367	10.638	2	0		No MS2	[M+H]+1	5.33832e+07	2.94295e+07	3.06664e+07	1.47029e+07	1.00104e+07	2.29595e+07	6.31439e+06	1.4772e+07	1.62172e+07	1.87293e+08	1.11096e+08	6.31768e+07	1.36329e+08	1.06055e+07	3.85993e+07	3.26343e+08	7.55765e+06	1.47249e+07	6.00201e+07	1.74884e+06	2.07035e+06	1.72174e+06	7.80528e+06	1.97487e+07	6.74996e+06	6.709e+06	4.79967e+06	1.00115e+07	8.95227e+06	6.12949e+07	1.78856e+07	7.42407e+07	3.12662e+07	4.90357e+07
TRUE		C13 H31 N O P2	Full match	No results	No results	No results	3.73	279.189	581.367	10.64	0	0		No MS2	[2M+Na]+1	5.33832e+07	2.94295e+07	3.06664e+07	1.47029e+07	1.00104e+07	2.29595e+07	6.31439e+06	1.4772e+07	1.62172e+07	1.87293e+08	1.11096e+08	6.31768e+07	1.36329e+08	1.06055e+07	3.85993e+07	3.26343e+08	7.55765e+06	1.47249e+07	6.00201e+07	1.67807e+06	1.77904e+06	1.72174e+06	7.80528e+06	8.31623e+06	6.74996e+06	6.709e+06	7.23202e+06	1.00115e+07	8.95227e+06	6.12949e+07	1.78856e+07	7.42407e+07	3.12662e+07	4.90357e+07
TRUE	nylon cyclic dimer	C12 H22 N2 O2	Full match	No results	No results	Full match	2.26	226.169	227.176	6.581	3	0		DDA for preferred ion	[M+H]+1	7.80895e+08	7.76786e+08	7.15408e+08	7.64286e+08	6.75943e+08	7.90444e+08	7.47881e+08	7.66722e+08	7.6555e+08	8.09585e+08	7.6198e+08	7.90413e+08	7.41339e+08	8.02746e+08	5.84155e+08	7.42317e+08	7.37939e+08	6.30217e+08	7.3475e+08	438173	207020	504317	1.0164e+08	1.06464e+08	1.09132e+08	1.04446e+08	1.01865e+08	1.10436e+08	7.03614e+07	7.8667e+08	8.06446e+08	7.57142e+08	8.70837e+08	7.83996e+08
TRUE		C25 H55 N3 O3 P2	Full match	No results	No results	No match	-3.81	507.37	508.377	12.52	5	0		No MS2	[M+H]+1	8.43505e+07	3.45676e+07	4.32816e+07	1.68834e+07	3.14281e+06	9.2619e+06	3.17558e+07	5.13842e+07	1.70588e+07	1.06596e+07	2.43365e+08	1.60589e+08	7.22025e+07	7.72961e+07	4.33879e+07	4.53972e+07	3.4438e+08	5.30101e+07	4.74879e+07	520892	376896	509307	3.28345e+06	6.03733e+06	5.71837e+06	4.844e+06	4.79196e+06	6.2049e+06	5.14856e+06	1.59733e+07	8.17314e+07	4.6878e+07	5.33841e+07	2.9873e+07
TRUE		C90 H137 N4 O18 P S	Full match	No results	No results	No results	0.04	1624.94	542.654	8.989	0	0		DDA for other ion	[M+3H]+3	7.07009e+07	1.35281e+08	6.51673e+06	7.22745e+06	5.93739e+06	2.55809e+07	7.32943e+06	2.28191e+07	1.16023e+07	2.01851e+07	3.54096e+08	1.34145e+08	1.09371e+07	9.63502e+07	2.26526e+07	6.16286e+08	8.78163e+06	2.72296e+07	4.90568e+07	2.51794e+06	1.83478e+06	3.11117e+06	5.20387e+07	5.91047e+07	6.29906e+07	4.51271e+07	5.32864e+07	6.44813e+07	6.35115e+07	4.85902e+06	1.42378e+07	1.18493e+07	1.79993e+08	5.935e+08
TRUE		C38 H78 N3 O5 P S2	Full match	No results	No results	No match	4.07	751.515	752.522	12.268	44	0		No MS2	[M+H]+1	1.33689e+07	2.34026e+08	4.80758e+08	1.84013e+08	1.2077e+08	1.26492e+07	5.23667e+07	1.56183e+08	8.76455e+07	2.11362e+08	1.22315e+07	1.07062e+08	7.69276e+07	6.95938e+07	1.54084e+08	1.40737e+07	1.95895e+07	1.20829e+08	6.68711e+07	1.33481e+07	1.20778e+07	1.18165e+07	4.04366e+07	1.38543e+07	1.33659e+07	1.401e+07	1.20604e+07	1.316e+07	1.29052e+07	8.71302e+07	1.21804e+07	1.1517e+08	1.16562e+08	2.61849e+08
TRUE		C19 H32 O3 S	Full match	No results	No results	No results	0.13	340.207	339.2	9.908	0	0		DDA for preferred ion	[M-H]-1	1.27368e+07	1.80029e+08	1.66633e+08	1.72347e+08	2.52206e+08	1.28612e+07	1.58465e+08	1.60145e+08	1.39866e+08	2.00556e+08	1.10891e+07	1.74291e+08	8.58981e+08	2.14992e+08	2.09037e+08	1.38253e+07	1.7956e+08	2.71744e+08	1.2411e+08	2.45656e+07	2.16373e+07	2.23263e+07	6.2168e+07	1.5273e+07	1.1102e+07	1.28408e+07	1.39587e+07	8.47267e+07	1.48129e+07	1.65419e+08	1.08537e+07	4.1589e+08	2.10446e+08	1.37299e+08
TRUE	4-Methylpyrrolo[1,2-a]pyrazine	C8 H8 N2	Full match	No results	No results	Full match	2.61	132.069	133.076	4.815	3	0		DDA for preferred ion	[M+H]+1	2.96009e+08	2.58273e+08	2.97077e+08	5.19981e+08	3.79381e+08	4.99324e+08	4.5956e+08	6.32211e+08	2.06537e+08	7.00308e+08	5.89504e+08	5.68766e+08	2.36605e+08	8.58429e+08	3.94295e+08	5.14513e+08	4.77232e+08	4.18236e+08	1.6818e+08	234147	460667	332935	1.99514e+07	3.12207e+07	3.9472e+07	2.67599e+07	3.53051e+07	2.86013e+07	3.16113e+07	2.80631e+08	2.75955e+08	2.95602e+08	4.61607e+08	2.20669e+08
TRUE		C38 H68 Br P S	Full match	No results	No results	No match	1.12	666.397	667.404	9.067	1	0		No MS2	[M+H]+1	2.03451e+06	1.82574e+07	5.58719e+06	6.0603e+06	4.22896e+06	5.64764e+06	1.61885e+06	3.32294e+06	2.97835e+06	1.33084e+07	5.96581e+07	2.43361e+07	4.36018e+06	4.46204e+07	8.19919e+06	1.00807e+08	4.07276e+06	6.29729e+06	7.52265e+06	938957	1.94413e+06	974362	7.42882e+06	5.72597e+06	6.50385e+06	7.9709e+06	9.29689e+06	9.22254e+06	8.52524e+06	4.82617e+06	2.73793e+06	6.68088e+06	3.45864e+07	1.54364e+08
TRUE	LysoPC(P-18:0)	C26 H54 N O6 P	Full match	No results	No results	Full match	1.92	507.37	508.377	11.994	5	0		DDA for preferred ion	[M+H]+1	4.37151e+08	9.84414e+07	2.10094e+08	1.44251e+08	4.78972e+07	1.6418e+08	1.39105e+08	1.73005e+08	1.08333e+08	3.00729e+08	2.82807e+08	2.02007e+08	1.85956e+08	3.32242e+07	1.38716e+07	6.17165e+07	3.07201e+08	6.23392e+07	3.76626e+07	461568	472606	444471	1.00397e+07	1.5859e+07	1.0437e+07	1.21114e+07	1.34706e+07	1.48059e+07	1.28548e+07	1.37083e+08	8.58225e+08	1.62918e+08	3.49293e+08	4.37825e+08
TRUE		C42 H85 N4 O7 P	Full match	No results	No results	No match	-1.58	788.614	789.622	13.126	3	0		No MS2	[M+H]+1	4.63895e+06	2.78052e+06	968710	958113	3.13539e+06	1.12788e+06	1.22388e+06	1.23509e+06	1.09705e+07	3.91344e+07	1.46239e+06	1.14732e+07	1.52186e+06	5.7173e+06	4.07953e+08	1.26731e+06	2.25052e+08	1.33324e+06	2.23729e+07	678525	708728	711551	1.35904e+06	3.23005e+06	3.05172e+06	3.98593e+07	8.61356e+06	5.04304e+06	1.94347e+07	1.69104e+08	1.38669e+06	9.57481e+07	1.3587e+06	1.04899e+08
TRUE		C69 H69 N2 O17 P S2	Full match	No results	No results	No results	0.84	1292.38	647.197	9.431	0	0		No MS2	[M+2H]+2	921164	1.3344e+06	940582	806685	849512	6.69892e+06	3.48649e+07	884871	3.12278e+06	778703	2.69861e+08	8.56265e+08	1.62418e+08	1.14599e+08	6.16936e+06	1.39127e+08	2.07818e+08	3.62027e+07	1.73289e+08	456933	416380	399168	2.39332e+06	3.08362e+06	2.10035e+06	1.47757e+06	1.14627e+06	3.53587e+06	2.33541e+06	1.71913e+07	1.52094e+06	5.83703e+06	3.43395e+06	4.05826e+06
TRUE	(2R)-3-{[6-(Tetracyclo[6.4.0.0~2,7~.0~3,6~]dodec-10-yl)hexanoyl]oxy}-2-{[8-(tetracyclo[6.4.0.0~2,7~.0~3,6~]dodec-10-yl)octyl]oxy}propyl 2-(trimethylammonio)ethyl phosphate	C46 H78 N O7 P	Full match	No results	No results	Full match	-0.79	787.551	788.558	10.308	1	0		No MS2	[M+H]+1	2.47693e+07	680691	4.92356e+07	2.73858e+07	2.1935e+07	2.35153e+06	611600	2.40511e+07	1.62815e+07	2.28542e+07	1.5323e+07	894130	5.26563e+08	8.52044e+08	4.00949e+08	2.15223e+07	636037	2.5337e+08	1.78655e+08	407528	505725	426279	4.70586e+07	1.35851e+07	9.43438e+06	1.09439e+08	1.45261e+08	7.53234e+07	651643	5.03374e+08	5.00807e+07	621569	2.25481e+08	5.50862e+07
TRUE		C25 H50 N6 O6	Full match	No results	No results	No results	2.55	530.381	531.388	11.275	0	0		DDA for preferred ion	[M+H]+1	3.29481e+08	3.98335e+08	8.1496e+07	2.60928e+08	9.07152e+07	3.13904e+08	8.38055e+07	2.0201e+08	1.8698e+08	3.63235e+07	3.93331e+08	6.19049e+08	2.85056e+08	8.49721e+08	1.08003e+08	4.97048e+08	4.85254e+08	1.39124e+08	2.92278e+08	1.24296e+08	1.2723e+08	1.36059e+08	1.43935e+08	1.3172e+08	1.3736e+08	1.7309e+08	1.22515e+08	1.30514e+08	1.57938e+08	4.47091e+08	1.84831e+08	2.58833e+08	1.10956e+08	1.64609e+08
TRUE		C4 H8 O P2 S	Full match	No results	No results	No results	4.85	165.978	166.985	12.05	0	0		No MS2	[M+H]+1	1.12121e+08	3.32114e+07	3.2973e+07	6.56526e+07	7.2617e+07	8.44676e+07	2.71342e+08	2.96479e+07	3.62105e+07	6.95689e+07	9.62812e+07	5.8377e+07	7.03982e+07	6.03937e+07	3.27291e+07	1.14898e+08	3.78218e+07	3.15552e+07	6.27879e+07	1.01946e+08	1.01454e+08	1.03353e+08	1.01687e+08	7.97334e+08	7.83869e+07	8.4906e+08	2.09654e+08	7.05138e+07	7.77112e+07	7.60823e+07	8.93768e+07	3.23779e+07	2.69192e+07	5.71554e+07
TRUE		C4 H8 O P2 S	Full match	No results	No results	No results	4.78	165.978	166.985	11.873	0	0		No MS2	[M+H]+1	7.55623e+07	6.98733e+07	6.83768e+07	7.53619e+07	7.89111e+07	8.44676e+07	8.43926e+07	6.11471e+07	7.10971e+07	6.55957e+07	6.1296e+07	6.32125e+07	6.71793e+07	7.13881e+07	6.76892e+07	7.43133e+07	7.07376e+07	6.49009e+07	7.06332e+07	1.13917e+08	1.20952e+08	1.19996e+08	1.12088e+08	7.97334e+08	8.62023e+07	8.4906e+08	2.09654e+08	8.04846e+07	8.48003e+07	7.1552e+07	6.44144e+07	7.06554e+07	5.39902e+07	5.71554e+07
TRUE		C32 H78 N9 O6 P3	Full match	No results	No results	No match	1.55	777.53	778.537	13.234	49	0		No MS2	[M+H]+1	1.75394e+06	7.76157e+07	9.73683e+07	7.752e+07	5.70892e+07	1.22163e+06	4.51752e+07	5.39683e+07	3.4978e+07	6.17049e+07	2.36844e+06	7.94883e+07	1.20666e+08	1.33942e+08	2.36673e+08	1.57454e+06	6.29768e+07	1.69376e+08	1.89713e+07	508660	548869	518149	3.39261e+07	837215	754136	764089	762823	675720	917839	1.52133e+08	1.37407e+06	5.03453e+07	2.17788e+07	2.88623e+07
TRUE		C16 H36 N2 O7	Full match	No results	No results	No results	-0.13	368.252	778.538	13.292	0	0		No MS2	[2M+ACN+H]+1	1.57015e+06	7.76157e+07	9.73683e+07	7.752e+07	5.70892e+07	1.38909e+06	5.1708e+07	5.39683e+07	3.4978e+07	6.17049e+07	2.36844e+06	5.6156e+07	1.20666e+08	1.33942e+08	6.55019e+07	1.60743e+06	6.29768e+07	5.31411e+07	3.114e+07	836174	902273	901438	3.39261e+07	1.37628e+06	1.07909e+06	1.15149e+06	1.10495e+06	1.02543e+06	1.32481e+06	6.62858e+07	1.29776e+06	5.03453e+07	3.58383e+06	2.88623e+07
TRUE		C41 H77 N9 O3 P2	Full match	No results	No results	No match	-1.09	805.562	806.569	10.681	52	0		No MS2	[M+H]+1	1.51479e+08	4.83994e+06	4.10282e+08	2.61272e+08	3.04548e+08	1.55916e+08	1.70471e+06	5.29271e+08	3.28722e+08	1.22425e+08	1.09958e+08	8.25626e+06	1.82361e+08	2.63576e+08	3.7157e+08	1.39845e+08	2.3904e+06	2.05895e+08	1.89105e+08	1.44999e+06	1.16396e+06	1.28949e+06	1.89421e+08	2.17692e+08	4.44565e+08	3.30388e+07	8.44385e+08	4.1714e+08	5.60993e+07	1.21919e+08	2.28375e+08	2.6762e+06	5.0838e+08	7.40008e+07
TRUE		C42 H77 N10 P3	Full match	No results	No results	No results	-0.19	814.554	832.588	13.647	0	0		No MS2	[M+NH4]+1	2.66736e+08	6.87325e+07	4.36478e+08	3.25006e+08	5.41602e+08	3.0527e+08	1.0337e+07	8.4117e+08	4.23284e+08	5.69283e+08	2.72594e+08	2.47954e+07	2.0533e+08	4.03815e+08	3.12927e+08	2.43508e+08	1.3365e+07	3.22474e+08	1.86695e+08	1.44558e+06	1.47001e+06	1.56813e+06	3.06672e+08	4.29521e+08	5.19405e+08	3.88216e+08	6.95706e+08	7.97981e+08	2.44437e+07	3.45309e+08	2.68182e+08	1.24145e+08	3.71786e+08	2.97146e+08
TRUE		C5 H16 N10 O	Full match	No results	No results	No match	-0.48	232.151	233.158	1.123	1	0		DDA for preferred ion	[M+H]+1	7.52857e+07	4.72217e+07	7.98967e+07	9.4737e+07	3.87201e+07	6.48129e+07	5.35937e+07	2.91807e+07	2.86714e+08	3.76627e+08	1.38628e+07	6.49851e+06	5.22477e+06	6.99145e+06	2.76347e+06	1.4013e+07	3.11523e+06	3.57713e+06	6.16063e+07	90175	76672.4	75782.5	2.32373e+07	2.00754e+07	2.4726e+07	2.36793e+07	2.81843e+07	2.75909e+07	1.99801e+07	2.08024e+07	1.74982e+08	6.46746e+07	1.74494e+08	3.70837e+08
TRUE		C37 H82 N9 O P3	Full match	No results	No results	No results	0.05	761.586	762.593	12.853	0	0		No MS2	[M+H]+1	1.11505e+08	925265	7.94238e+07	8.61889e+07	4.34464e+08	7.85078e+07	739018	3.26134e+08	8.1867e+08	2.17755e+08	7.38221e+08	1.06428e+06	5.5526e+07	3.63429e+07	2.48074e+07	4.08209e+07	1.17465e+06	2.96828e+07	4.93548e+07	760887	806093	713765	2.72113e+07	2.97326e+08	8.38366e+08	5.40018e+07	4.45841e+07	5.68137e+07	4.23604e+06	5.59297e+07	1.53579e+08	986281	4.25454e+07	1.04333e+08
TRUE		C42 H83 N5 O7 P2	Full match	No results	No results	No match	0.55	831.577	832.584	13.655	34	0		No MS2	[M+H]+1	2.94999e+08	6.87325e+07	4.36478e+08	3.25006e+08	5.44778e+08	3.06301e+08	1.0337e+07	8.37929e+08	4.23284e+08	5.69283e+08	2.72594e+08	2.47954e+07	2.0533e+08	4.03815e+08	3.12927e+08	2.43508e+08	1.3365e+07	3.22474e+08	1.86695e+08	1.3968e+06	1.4204e+06	1.51521e+06	3.06672e+08	4.43527e+08	5.19405e+08	3.88216e+08	6.95706e+08	8.03465e+08	3.91016e+07	3.45309e+08	2.68182e+08	1.24145e+08	3.71786e+08	2.97146e+08
TRUE	L-Proline	C5 H9 N O2	Full match	No results	Full match	Full match	1.98	115.064	116.071	1.033	6	0		DDA for other ion	[M+H]+1	7.57037e+08	6.02721e+08	5.23067e+08	4.98002e+08	5.29986e+08	4.41045e+08	4.18444e+08	4.35257e+08	4.25286e+08	4.92963e+08	1.2248e+08	3.27323e+08	9.90848e+07	1.3752e+08	1.55629e+08	8.13739e+07	1.38561e+08	1.78802e+08	1.63946e+08	2.25424e+06	2.07692e+06	2.16503e+06	1.27167e+08	1.32151e+08	1.59846e+08	1.36923e+08	1.39058e+08	1.49967e+08	1.4329e+08	1.71607e+08	5.22568e+08	3.95774e+08	5.5795e+08	4.78195e+08
TRUE		C28 H43 O4 P	Full match	No results	No results	No results	1.46	474.291	473.283	11.456	0	0		DDA for preferred ion	[M-H]-1	9.15286e+07	5.51576e+08	5.13233e+08	5.36558e+08	6.98217e+08	1.20473e+08	5.55322e+08	6.21183e+08	6.25017e+08	4.93621e+08	1.14285e+08	4.62425e+08	4.8286e+08	4.25904e+08	7.56958e+08	1.01622e+08	7.11167e+08	8.31216e+08	5.66891e+08	1.18853e+08	1.11481e+08	1.19927e+08	1.60965e+08	1.14046e+08	1.20278e+08	1.29183e+08	1.27222e+08	1.12372e+08	1.27558e+08	5.43126e+08	9.31323e+07	5.85869e+08	5.44163e+08	5.96148e+08
TRUE	(1R,3S,5Z)-5-{(2E)-2-[(1Z,3aS,7aS)-1-(6-Ethyl-6-hydroxy-3-octyn-2-ylidene)-7a-methyloctahydro-4H-inden-4-ylidene]ethylidene}-4-methylene-1,3-cyclohexanediol	C29 H42 O3	No results	No results	No results	Full match	0.43	438.314	473.283	11.391	3	0		DDA for preferred ion	[M+Cl]-1	9.15286e+07	5.51576e+08	5.13233e+08	5.36558e+08	6.98217e+08	1.20473e+08	5.55322e+08	6.21183e+08	6.25017e+08	4.93621e+08	1.14285e+08	4.62425e+08	4.8286e+08	4.25904e+08	7.56958e+08	1.01622e+08	7.11167e+08	8.31216e+08	5.66891e+08	1.05333e+08	9.86103e+07	9.90096e+07	1.60965e+08	1.14046e+08	1.20278e+08	1.29183e+08	1.27222e+08	1.12372e+08	1.27558e+08	5.43126e+08	9.31323e+07	5.85869e+08	5.44163e+08	5.96148e+08
TRUE	N,N-Bis(2-hydroxyethyl)dodecanamide	C16 H33 N O3	Full match	No results	No results	Full match	2.34	287.247	288.254	10.033	2	0		DDA for preferred ion	[M+H]+1	8.90634e+06	3.65764e+08	8.60996e+06	9.07896e+06	1.25951e+07	1.18891e+07	1.48697e+07	1.73488e+07	1.05719e+08	1.45337e+07	1.56813e+07	1.22011e+08	9.79492e+07	3.0225e+08	2.53188e+08	1.64279e+08	4.37295e+07	4.03194e+08	6.33375e+07	1.79084e+06	1.58401e+06	2.24663e+06	1.53792e+07	1.3116e+07	1.4392e+07	1.18228e+07	1.36685e+07	1.57312e+07	1.42513e+07	7.25279e+07	5.95366e+08	6.88168e+07	1.21052e+07	1.30651e+07
TRUE		C41 H79 N O14	Full match	No results	No results	No results	1.75	809.551	810.559	10.87	0	0		No MS2	[M+H]+1	3.08416e+08	3.04835e+08	2.75026e+08	1.87914e+07	5.96344e+07	2.12568e+08	2.6195e+07	1.9266e+08	2.89356e+08	7.10566e+07	5.58001e+08	6.29955e+08	6.16401e+08	6.54662e+07	1.67217e+08	6.01468e+08	3.48095e+07	3.24487e+08	2.49472e+08	464813	513808	448425	6.74861e+07	6.31622e+07	6.95991e+07	6.94354e+07	7.17009e+07	7.78087e+07	6.83278e+07	2.51251e+08	3.31604e+08	3.2644e+08	2.85339e+08	4.12475e+08
TRUE		C36 H75 N4 O8 P	Full match	No results	No results	No results	4.54	722.536	723.543	10.662	0	0		No MS2	[M+H]+1	1.17452e+06	1.75273e+08	2.27363e+08	2.03319e+08	1.40862e+08	1.08456e+06	1.36391e+08	7.18925e+07	4.8393e+07	1.58976e+08	1.59338e+06	3.53351e+08	8.24077e+08	5.24224e+08	1.95606e+08	1.65686e+06	5.69221e+08	3.25804e+08	4.91906e+08	702492	623778	592914	4.64692e+07	900269	885260	843362	790645	890298	769257	4.17746e+08	2.45385e+06	6.97353e+07	4.49871e+07	2.26939e+08
TRUE		C36 H72 N10 O P2	Full match	No results	No results	No results	-1.34	722.536	723.543	10.525	0	0		No MS2	[M+H]+1	1.78086e+06	6.46807e+06	1.94045e+07	8.41963e+06	3.65151e+06	1.52041e+06	2.9106e+06	4.62712e+06	4.23943e+06	1.02775e+07	2.62416e+06	2.87025e+08	8.24077e+08	5.78713e+08	2.27077e+08	3.72976e+06	1.4327e+08	3.50136e+08	1.82281e+08	551679	537533	588710	8.36772e+07	807668	818448	755082	846076	852253	825498	1.58722e+08	1.78976e+06	2.15733e+08	1.28311e+07	9.70238e+07
TRUE		C9 H9 N O S2	Full match	No results	No results	No results	2.55	211.013	212.02	9.115	0	0		DDA for preferred ion	[M+H]+1	3.81009e+06	6.35368e+07	9.44094e+06	8.4598e+06	3.06215e+07	5.35907e+07	2.26735e+08	447164	1.9687e+06	1.53506e+08	6.40481e+06	1.28511e+08	1.75575e+07	7.11311e+08	5.94921e+08	4.03575e+08	1.40209e+08	2.74905e+06	5.57516e+08	168351	178994	155583	1.2299e+07	1.13936e+07	1.23857e+07	1.32302e+07	1.19464e+07	1.39552e+07	1.31588e+07	3.12698e+06	2.09292e+08	7.91009e+07	1.33493e+08	2.40738e+08
TRUE		C47 H76 N5 O4 P	Full match	No results	No results	No match	0.19	805.564	806.571	13.945	52	0		No MS2	[M+H]+1	4.75211e+06	3.8911e+08	1.75722e+08	8.2302e+08	1.67126e+08	2.56239e+06	3.92605e+08	2.62553e+08	2.9432e+08	3.10602e+08	9.37394e+06	2.26845e+08	2.96029e+08	1.80368e+08	1.59071e+08	5.04741e+06	2.25056e+08	1.41238e+08	1.58124e+08	1.26892e+06	1.19624e+06	1.08531e+06	8.86292e+07	1.59807e+06	7.24379e+06	1.1661e+06	3.18324e+06	1.3184e+06	1.1284e+06	2.79911e+08	1.11294e+07	3.08021e+08	8.97455e+07	2.9321e+08
TRUE		C21 H40 N2 P2	Full match	No results	No results	No results	4.69	382.268	806.571	14.02	0	0		No MS2	[2M+ACN+H]+1	4.92505e+06	3.8911e+08	1.75722e+08	8.2302e+08	1.67126e+08	2.56239e+06	3.92605e+08	2.62553e+08	2.9432e+08	3.10602e+08	9.37394e+06	2.26845e+08	2.96029e+08	1.80368e+08	1.59071e+08	5.04741e+06	2.25056e+08	1.41238e+08	1.58124e+08	1.42204e+06	1.09689e+06	1.00493e+06	8.86292e+07	1.19875e+06	7.24379e+06	1.13959e+06	2.76389e+06	1.33554e+06	1.15944e+06	2.79911e+08	1.11294e+07	3.08021e+08	8.97455e+07	2.9321e+08
TRUE		C45 H78 N5 O4 P	Full match	No results	No results	No match	-0.1	783.579	784.586	14.782	48	0		No MS2	[M+H]+1	2.36039e+06	3.36596e+06	3.4336e+07	1.57002e+07	1.35694e+07	2.68543e+06	239581	1.30306e+06	2.36788e+06	1.38982e+06	8.00175e+06	8.09947e+06	2.48588e+07	5.57093e+07	3.53461e+07	6.976e+06	4.72516e+07	1.3703e+07	1.0559e+07	159473	166950	185074	2.09886e+06	954730	1.84681e+06	951575	1.51617e+07	3.00464e+06	1.58388e+06	9.1647e+06	2.85703e+07	1.66246e+08	1.27425e+07	4.49775e+07
TRUE		C89 H171 N8 O15 P3 S5	Full match	No results	No results	No results	0.75	1845.07	616.03	9.039	0	0		DDA for other ion	[M+3H]+3	8.09338e+06	1.22771e+07	267072	839190	7.86985e+06	4.96542e+06	1.17911e+06	2.68598e+06	1.66523e+06	3.39037e+06	9.3969e+07	2.70661e+07	3.1131e+06	1.91354e+07	1.16517e+07	3.12648e+08	1.45891e+06	5.5865e+06	1.80839e+07	1.39681e+06	1.26522e+06	135437	1.34261e+07	1.76225e+07	1.47986e+07	1.43314e+07	1.11875e+07	1.63123e+07	1.63934e+07	428955	918733	2.77596e+06	7.66393e+07	1.34963e+08
TRUE		C43 H76 N5 O6 P	Full match	No results	No results	No match	0.02	789.553	790.561	13.021	22	0		No MS2	[M+H]+1	3.81059e+07	1.28077e+06	1.13327e+06	1.06746e+06	1.73816e+06	1.37025e+07	1.85981e+07	3.17954e+06	1.19779e+06	1.4892e+06	2.46648e+08	1.90258e+08	9.19127e+06	1.88658e+06	2.52317e+06	3.30917e+07	7.9222e+07	1.89404e+06	7.0342e+06	634039	571715	563266	693211	790116	2.861e+06	844527	818633	751228	6.60945e+06	7.34704e+06	4.76484e+06	8.54794e+06	4.18777e+08	1.19069e+08
TRUE		C28 H48 N6 O6	Full match	No results	No results	No results	2.65	564.365	565.372	11.143	0	0		DDA for preferred ion	[M+H]+1	7.29407e+07	2.4935e+07	3.90486e+07	7.32232e+06	4.7018e+07	3.25226e+07	1.26064e+07	4.8911e+07	2.00976e+07	2.09408e+07	1.24618e+08	2.84533e+07	2.15001e+08	4.68118e+07	6.86728e+07	3.90768e+08	1.43519e+07	7.4083e+07	1.1123e+08	907031	1.24451e+07	3.98887e+06	1.50877e+07	3.91305e+07	3.51925e+07	1.13491e+07	1.32858e+07	3.84794e+07	1.33391e+07	6.70937e+07	2.51323e+07	1.12755e+08	3.88121e+07	6.32368e+07
TRUE		C20 H48 N9 P3	Full match	No results	No results	No results	3.89	507.327	508.334	10.885	0	0		DDA for preferred ion	[M+H]+1	3.59731e+08	2.57023e+08	2.48661e+08	8.21607e+07	1.66405e+08	1.93753e+08	8.45436e+07	1.39083e+08	1.48988e+08	1.26452e+08	3.23142e+08	3.15375e+08	2.44462e+08	1.9447e+08	4.53661e+08	3.62287e+08	1.5828e+08	1.83774e+08	5.82073e+08	5.82403e+06	5.08656e+06	3.03339e+06	1.14634e+08	1.15017e+08	1.06811e+08	1.006e+08	1.10202e+08	1.19267e+08	1.10271e+08	3.79681e+08	1.37623e+08	4.09697e+08	2.41769e+08	2.45918e+08
TRUE		C19 H37 N O2 S	Full match	No results	No results	No results	1.6	343.255	344.262	11.765	0	0		DDA for preferred ion	[M+H]+1	7.04492e+07	4.01277e+08	4.9155e+08	9.27451e+07	2.64651e+07	2.06747e+08	9.41055e+06	2.53847e+08	4.55786e+08	1.19236e+08	4.53943e+07	1.78126e+07	4.76038e+06	6.00673e+07	6.15034e+07	8.10323e+06	1.53822e+07	1.11492e+08	2.1781e+07	797645	768218	763320	1.24678e+07	2.43224e+07	1.93356e+07	1.53482e+07	1.74088e+07	1.23777e+07	1.64272e+07	1.09814e+07	3.85586e+08	2.46422e+06	4.31304e+08	4.51496e+08
TRUE		C31 H41 N2 O10 P	Full match	No results	No match	No results	-0.67	632.249	633.257	9.464	0	0		No MS2	[M+H]+1	4.42101e+06	2.46666e+06	1.16901e+07	318680	8.12177e+06	2.55078e+06	2.18445e+06	1.74176e+06	1.40909e+07	1.303e+06	1.29254e+07	7.56811e+08	1.38042e+07	3.69932e+07	4.82721e+06	2.02463e+07	1.08581e+07	7.34165e+06	1.40543e+07	135913	152311	157691	2.66946e+06	2.27138e+06	3.39331e+06	2.6593e+06	2.63393e+06	4.03754e+06	3.64359e+06	1.48592e+08	9.90274e+06	6.1917e+06	1.10877e+08	5.08984e+07
TRUE	4-Dodecylbenzenesulfonic acid	C18 H30 O3 S	Full match	Full match	No results	Full match	0.87	326.192	325.185	14.755	2	3	9.8	DDA for preferred ion	[M-H]-1	7.63604e+07	9.34169e+07	5.09213e+07	4.83706e+07	5.26673e+07	1.06858e+08	5.68024e+07	6.20744e+07	7.25031e+07	5.78762e+07	1.18666e+08	8.11799e+08	9.048e+07	1.13562e+08	7.50842e+07	1.26332e+08	7.92988e+07	9.19706e+07	7.56493e+07	2.55398e+07	2.50962e+07	2.50493e+07	1.98824e+07	3.76663e+07	3.13795e+07	5.25672e+07	3.15533e+07	5.96197e+07	2.91247e+07	2.57725e+08	1.26145e+08	4.98538e+07	1.14888e+08	8.33107e+07
TRUE	O-heptadecanoylcarnitine	C24 H47 N O4	Full match	No results	No results	Full match	1.79	413.351	414.359	9.937	1	0		DDA for preferred ion	[M+H]+1	1.36914e+08	8.11165e+08	1.06192e+08	9.02208e+07	5.54647e+08	6.03936e+07	4.91154e+07	6.81066e+07	1.20515e+08	1.12892e+08	3.63465e+07	5.32118e+06	1.18242e+07	2.21104e+07	8.9055e+06	1.53309e+07	1.53546e+07	1.91017e+07	1.49499e+07	286809	260271	211358	9.30716e+06	7.29053e+06	7.17189e+06	1.82357e+07	1.60306e+07	1.54775e+07	9.38438e+06	4.45673e+07	2.83356e+08	1.23927e+08	1.54045e+08	3.37357e+08
TRUE		C37 H78 N7 O9 P S	Full match	No results	No results	No match	-1.68	827.531	828.538	12.056	1	0		No MS2	[M+H]+1	6.97278e+06	3.37782e+06	3.49865e+06	2.3545e+06	2.07644e+06	2.16076e+06	1.87995e+06	3.84124e+06	3.63887e+06	3.37465e+06	1.4199e+07	9.84598e+06	4.43627e+06	2.8821e+06	2.62236e+06	2.24636e+06	3.93539e+06	2.74841e+06	2.45787e+06	858155	830035	889182	1.55168e+06	1.74116e+06	2.13512e+06	1.98454e+06	1.47118e+06	1.80871e+06	1.53684e+06	1.14601e+07	2.99585e+06	2.30295e+06	2.10322e+08	5.78552e+07
TRUE		C41 H78 N7 O2 P3 S	Full match	No results	No results	No results	0.55	825.516	826.523	12.03	0	0		No MS2	[M+H]+1	5.49491e+06	4.96072e+06	5.13817e+06	3.45785e+06	3.0495e+06	3.17333e+06	2.76092e+06	5.6413e+06	4.10582e+06	4.95606e+06	9.55601e+06	2.21498e+07	4.55698e+06	4.2327e+06	3.85123e+06	3.29904e+06	3.53703e+06	4.03636e+06	3.60966e+06	1.26579e+06	1.3257e+06	1.30587e+06	2.27882e+06	2.55709e+06	3.13566e+06	2.91452e+06	2.1606e+06	2.6563e+06	2.25703e+06	6.07053e+06	4.39976e+06	3.38215e+06	5.33867e+07	5.78552e+07
TRUE		C25 H51 N5 O P2 S	Full match	No results	No results	No match	4.25	531.331	532.338	11.532	1	0		No MS2	[M+H]+1	2.06396e+07	8.04595e+08	5.69673e+07	1.98356e+07	1.99616e+07	1.11682e+07	2.21484e+07	1.28265e+07	5.29848e+07	2.97939e+07	1.50842e+07	1.09727e+07	1.51195e+07	8.87436e+06	7.19126e+06	6.55822e+06	8.24752e+06	1.24589e+07	6.64454e+06	561168	527329	520530	7.26622e+06	7.64793e+06	6.61836e+06	6.41412e+06	5.04486e+06	6.27225e+06	8.64002e+06	6.46494e+07	5.73226e+07	3.86145e+07	1.18669e+08	1.34183e+08
TRUE		C23 H45 N5 P2	Full match	No results	No results	No results	4.25	453.317	532.338	11.505	0	0		No MS2	[M+DMSO+H]+1	2.31918e+07	8.04595e+08	1.1268e+08	1.98356e+07	1.99616e+07	1.11682e+07	3.40954e+06	1.28265e+07	5.29848e+07	2.97939e+07	4.11055e+06	5.76604e+06	2.96154e+06	1.85162e+07	6.65165e+06	4.55064e+06	8.24752e+06	1.34424e+07	4.37858e+06	481832	452776	446939	5.46015e+06	7.64793e+06	6.61836e+06	6.41412e+06	5.04486e+06	7.65506e+06	8.64002e+06	1.55496e+07	5.73226e+07	3.9343e+07	1.18669e+08	1.34183e+08
TRUE		C40 H61 N2 O9 P	Full match	No results	No results	No results	2.92	744.414	745.421	12.065	0	0		No MS2	[M+H]+1	6.10013e+08	1.96152e+08	7.42892e+08	5.07584e+07	3.99977e+07	3.80911e+07	3.2605e+07	4.90396e+07	4.62572e+07	5.29267e+07	4.26012e+07	4.20702e+07	4.48827e+07	4.28878e+07	3.66465e+07	3.48837e+07	3.87959e+07	4.82466e+07	4.23136e+07	2.02969e+07	2.03708e+07	1.89172e+07	3.14463e+07	3.44468e+07	3.77733e+07	3.50823e+07	3.20768e+07	3.26962e+07	3.92608e+07	4.01701e+07	4.1533e+07	3.91263e+07	5.23716e+07	5.00735e+07
TRUE	(2S)-3-{[(1Z)-11-Methyl-1-dodecen-3-yn-1-yl]oxy}-1,2-propanediol	C16 H28 O3	Full match	No results	No results	Full match	2.37	268.204	269.212	8.979	9	0		No MS2	[M+H]+1	561033	932556	644735	798842	1.14551e+06	436203	8.31855e+07	803371	1.32674e+06	937381	1.24319e+06	811892	587192	3.16929e+06	1.1341e+06	3.30251e+06	8.00788e+08	931250	553496	1.86231e+06	1.74631e+06	1.44244e+06	4.84891e+06	3.29716e+06	4.07123e+06	4.87971e+06	2.87192e+06	4.24306e+06	3.51003e+06	421733	999711	871152	1.1374e+06	2.95616e+06
TRUE		C29 H63 N9 O4 P2	Full match	No results	No results	No match	2	663.449	664.456	12.274	1	0		No MS2	[M+H]+1	2.80039e+07	2.42669e+07	1.98701e+07	1.42092e+07	1.54831e+07	2.6063e+07	9.35686e+06	2.01979e+07	2.48789e+07	3.18245e+07	4.66062e+07	4.20271e+07	2.42715e+07	2.28144e+07	3.03883e+07	4.30917e+07	4.52339e+07	2.42203e+07	3.87729e+07	1.64156e+07	1.79537e+07	1.43238e+07	1.20171e+07	1.11598e+07	1.20154e+07	2.57093e+07	1.141e+07	3.17425e+07	1.11499e+07	2.94043e+07	3.23071e+07	8.20284e+06	3.33721e+08	8.64153e+07
TRUE		C24 H61 N10 O14 P	Full match	No results	No results	No results	4.09	744.414	745.421	12.267	0	0		No MS2	[M+H]+1	2.48036e+08	2.60895e+08	2.78248e+08	3.86405e+07	2.40044e+08	2.14624e+08	2.13231e+08	2.74283e+08	2.6513e+08	2.8188e+08	2.46089e+08	2.50879e+08	7.15757e+08	2.62365e+08	1.11769e+08	2.18822e+08	2.41062e+08	2.75808e+08	2.52645e+08	1.23911e+08	1.1862e+08	1.17253e+08	1.98727e+08	4.94724e+08	2.05946e+08	2.13616e+08	2.03216e+08	2.03075e+08	2.17261e+08	2.48607e+08	4.13376e+07	2.47424e+08	3.0291e+08	2.92808e+08
TRUE	3-[(9Z)-9-Hexadecen-1-yloxy]-2-oxopropyl dihydrogen phosphate	C19 H37 O6 P	Full match	No results	No results	Full match	0.86	392.233	391.226	11.292	3	0		DDA for preferred ion	[M-H]-1	200278	2.95463e+07	7.97979e+08	4.79608e+08	9.5424e+06	271407	1.27842e+06	2.19558e+07	9.46437e+06	1.0376e+08	151375	1.94359e+07	2.20062e+07	1.37311e+07	6.11617e+06	134722	7.14118e+06	1.11317e+07	5.28724e+06	96979.5	93640.3	97779.7	1.05029e+07	277082	195555	112725	181617	113510	118377	3.98119e+06	381582	9.40566e+07	2.99973e+07	1.26546e+07
TRUE		C36 H75 N9 O3 P2	Full match	No results	No results	No match	1.48	743.548	744.555	13.019	52	0		No MS2	[M+H]+1	1.59273e+06	1.68459e+07	1.44012e+08	1.68688e+07	1.65596e+07	897853	1.27769e+07	2.17893e+07	3.16349e+06	2.60575e+07	1.57112e+06	1.38472e+07	2.00336e+07	1.26022e+07	2.21214e+07	947832	1.52707e+07	2.60835e+06	3.26142e+06	401644	448477	413164	1.3678e+07	619799	672008	662481	642169	589294	563718	1.42402e+07	1.0556e+06	2.57822e+07	4.81847e+06	4.03606e+07
TRUE		C90 H130 N6 O14 P2	Full match	No results	No results	No results	0.38	1580.91	527.978	8.979	0	0		DDA for other ion	[M+3H]+3	1.16826e+08	1.17112e+08	4.48271e+06	5.41191e+06	6.42901e+06	2.31943e+07	9.40473e+06	1.66644e+07	8.14495e+06	2.37173e+07	3.35583e+08	1.30159e+08	1.1152e+07	9.49857e+07	1.90245e+07	6.11756e+08	7.9399e+06	2.68228e+07	5.11393e+07	2.39926e+06	2.12301e+06	3.39258e+06	5.13954e+07	5.83633e+07	5.96782e+07	4.64642e+07	5.46344e+07	6.67863e+07	6.19377e+07	4.79358e+06	1.22314e+07	1.28173e+07	2.40891e+08	5.282e+08
TRUE	Cycloheximide	C15 H23 N O4	Full match	No results	No results	Full match	2.05	281.163	282.171	6.535	2	0		DDA for preferred ion	[M+H]+1	713100	765093	5.93371e+08	3.32467e+08	2.3617e+08	567368	6.97987e+07	3.49877e+08	3.57883e+08	769070	1.2794e+06	4.22059e+06	1.78081e+08	2.00834e+08	4.30484e+07	394024	6.78614e+07	8.73748e+07	359890	162096	148919	157567	8.55438e+06	9.44461e+06	8.87731e+06	1.14593e+07	9.10869e+06	8.88134e+06	6.60258e+06	2.01612e+08	3.0471e+07	413125	3.67243e+08	4.75902e+06
TRUE	2-Isopropenylpyrazine	C7 H8 N2	No results	No results	No results	Full match	-3.15	120.068	282.171	6.451	5	0		DDA for other ion	[2M+ACN+H]+1	443947	509947	5.93371e+08	3.32467e+08	2.3617e+08	304659	6.97987e+07	3.49877e+08	3.57883e+08	465186	244802	1.4906e+06	1.01338e+08	2.00834e+08	4.30484e+07	306621	4.10917e+07	5.01015e+07	224826	114396	117342	147975	4.37216e+06	5.00439e+06	5.22118e+06	3.15031e+06	5.62465e+06	4.21538e+06	2.95165e+06	2.01612e+08	3.0471e+07	225285	3.67243e+08	4.75902e+06
TRUE		C47 H91 N8 O12 P3	Full match	No results	No results	No results	0.6	1052.6	527.306	8.795	0	0		DDA for other ion	[M+2H]+2	3.6467e+07	3.44345e+07	1.86485e+07	1.07846e+07	1.03901e+07	2.27165e+07	1.51905e+07	1.92955e+07	1.28799e+07	1.50137e+07	1.30484e+08	6.39147e+07	3.19766e+07	4.3594e+07	1.92749e+07	1.16398e+08	1.98494e+07	2.80938e+07	2.87909e+07	1.29216e+07	1.25046e+07	1.86419e+07	2.77438e+07	2.87909e+07	2.94694e+07	2.28303e+07	3.13929e+07	2.92296e+07	2.26701e+07	2.05778e+07	1.3414e+07	1.1514e+07	6.2375e+07	2.33257e+08
TRUE		C33 H67 N4 O4 P	Full match	No results	No results	No match	0.7	614.49	615.498	10.349	36	0		No MS2	[M+H]+1	1.93897e+08	8.59624e+07	6.0756e+06	3.81458e+07	2.19395e+07	7.58105e+06	6.82536e+07	5.14086e+06	6.4385e+06	1.28997e+07	1.10826e+07	1.11432e+08	1.00364e+07	6.01742e+07	2.65824e+08	1.29486e+07	1.21263e+08	1.20307e+07	1.69937e+08	1.24089e+07	8.62375e+06	2.15977e+07	6.48364e+06	3.06885e+07	4.3641e+07	7.90521e+08	4.00905e+08	4.23222e+07	7.67941e+06	2.89246e+07	8.65492e+06	1.31057e+08	1.07528e+07	3.60379e+06
TRUE		C35 H76 N7 O4 P3	Full match	No results	No results	No match	-3.79	751.514	752.522	11.483	44	0		No MS2	[M+H]+1	2.28512e+07	5.01806e+07	1.94547e+07	7.31601e+07	1.01041e+07	9.39051e+06	9.97252e+06	8.59331e+06	7.33423e+07	7.42357e+07	4.86282e+07	1.19966e+07	2.94048e+07	3.59513e+07	1.5827e+07	1.38617e+07	1.13766e+07	7.13327e+07	2.24468e+07	3.34499e+07	7.71105e+06	7.64652e+06	6.54618e+07	6.7905e+07	7.11846e+07	9.48949e+07	7.70514e+07	7.71849e+07	1.00352e+07	8.66039e+07	1.42458e+08	2.88951e+07	9.22215e+06	8.88254e+07
TRUE		C42 H78 N5 O4 P	Full match	No results	No results	No match	-0.11	747.579	748.586	13.209	35	0		No MS2	[M+H]+1	1.27524e+08	1.58674e+06	1.68134e+07	7.83976e+08	3.67894e+08	1.98781e+08	1.73464e+06	8.20087e+07	1.06278e+08	9.57415e+07	3.40348e+07	1.8391e+06	9.52345e+06	8.64476e+07	3.21308e+07	9.56299e+07	2.89343e+06	3.49558e+07	3.98595e+07	809255	835193	848644	1.90846e+08	2.89939e+07	6.80721e+07	2.2032e+07	2.16576e+07	1.78488e+07	2.10754e+07	3.3168e+07	5.59025e+07	1.62027e+06	1.77712e+07	9.27618e+06
TRUE		C31 H73 N9 O9	Full match	No results	No results	No match	0.04	715.553	748.587	13.217	16	0		No MS2	[M+H+MeOH]+1	1.27524e+08	1.00585e+06	1.68134e+07	7.83976e+08	3.67894e+08	1.98781e+08	1.0996e+06	8.20087e+07	1.06278e+08	5.05824e+07	8.96599e+07	1.16582e+06	9.52345e+06	8.64476e+07	1.6103e+07	4.38001e+07	1.83417e+06	3.49558e+07	3.98595e+07	490650	529436	499803	1.90846e+08	1.43569e+07	6.80721e+07	7.42674e+06	3.62441e+06	8.75988e+06	2.10754e+07	3.3168e+07	5.59025e+07	1.0271e+06	1.77712e+07	9.27618e+06
TRUE	1-Hexadecanoylpyrrolidine	C20 H39 N O	Full match	No results	No results	Full match	2.03	309.304	310.311	12.287	1	0		No MS2	[M+H]+1	1.24272e+08	1.41032e+08	1.30783e+08	1.66602e+08	7.30731e+07	1.67268e+08	1.53628e+08	1.11345e+08	1.03192e+08	7.49567e+07	2.1539e+08	2.35152e+08	1.90771e+08	1.60251e+08	1.32833e+08	2.24022e+08	2.11339e+08	1.46513e+08	1.7002e+08	2.03732e+06	1.60471e+06	6.80175e+06	1.88947e+07	2.17232e+07	1.3718e+07	1.58576e+07	1.81509e+07	1.96767e+07	1.32779e+07	1.25874e+08	1.67393e+08	7.87574e+07	1.11878e+08	1.45187e+08
TRUE	Corn thiazoline	C5 H7 N O S	Full match	No results	No results	Full match	2.78	129.025	162.059	1.278	4	0		DDA for preferred ion	[M+H+MeOH]+1	7.62139e+07	1.39642e+08	2.07012e+08	1.26555e+08	6.79548e+07	1.97385e+08	8.48535e+07	1.06728e+08	1.84146e+08	2.74585e+08	5.65265e+07	5.33679e+07	5.92525e+07	8.59201e+07	6.7005e+07	7.43269e+07	7.47301e+07	9.53945e+07	6.61633e+07	90391.6	93111.2	88294.8	9.37146e+06	8.87724e+06	8.49046e+06	9.64822e+06	9.67959e+06	9.93393e+06	9.91188e+06	8.31348e+07	1.64229e+08	9.44064e+07	3.96631e+08	2.89886e+08
TRUE		C37 H82 N7 O6 P3	Full match	No results	No results	No match	-0.63	813.553	814.561	13.327	16	0		No MS2	[M+H]+1	6.047e+07	1.23525e+06	1.17046e+07	5.39186e+06	2.24598e+07	1.948e+07	6.72199e+07	2.73165e+07	1.84467e+07	2.59518e+07	6.39079e+07	1.13893e+08	6.89754e+07	1.38599e+07	4.51139e+06	1.01405e+07	3.64381e+07	8.36911e+06	3.12575e+07	630704	629576	651038	858422	704523	804748	752081	963117	770641	968090	1.72428e+07	3.4328e+07	4.19085e+06	7.73921e+08	6.92296e+07
TRUE		C66 H101 N6 O7 P3	Full match	No results	No results	No results	-0.25	1182.69	592.354	10.595	0	0		No MS2	[M+2H]+2	447690	1.62054e+08	490543	3.77496e+06	518683	489187	3.21032e+06	9.67695e+07	1.84924e+08	467327	1.02068e+06	7.72051e+08	1.45902e+06	2.05096e+08	2.23899e+06	5.3709e+06	2.57499e+06	1.71737e+08	461875	291422	270661	265334	4.48793e+06	4.41266e+06	5.39581e+06	4.26485e+06	5.96506e+06	4.89702e+06	7.01601e+06	4.03748e+06	1.57716e+08	372390	539836	562321
TRUE		C25 H53 N9 O6	Full match	No results	No results	No results	-1.85	575.411	576.418	11.111	0	0		No MS2	[M+H]+1	2.70253e+07	2.12373e+08	2.40057e+07	4.99148e+07	4.10779e+07	5.45616e+07	5.59105e+07	7.71716e+08	7.43477e+07	7.36604e+07	7.02713e+07	2.23322e+08	6.66124e+07	1.31532e+08	1.92958e+08	7.39541e+07	1.50524e+08	4.49987e+07	3.61082e+07	2.44529e+07	6.35443e+07	6.5174e+07	8.30864e+07	7.19337e+07	6.92284e+07	1.39258e+07	1.14696e+07	1.65377e+07	1.72755e+07	1.55341e+08	1.55538e+08	8.55612e+07	1.38895e+08	1.94431e+07
TRUE		C40 H82 N2 O8 P2	Full match	No results	No results	No results	-3.11	780.552	781.559	12.306	0	0		No MS2	[M+H]+1	3.02697e+06	1.42073e+08	1.80509e+08	4.22064e+07	5.46379e+07	3.21612e+06	1.65656e+08	1.64536e+08	1.24642e+08	2.71427e+08	5.13525e+06	1.55505e+08	2.15873e+08	1.87657e+08	1.78861e+08	2.89405e+06	1.73967e+08	1.65691e+08	8.73548e+07	801561	760273	761405	3.35738e+07	1.23819e+06	2.09484e+06	2.03414e+06	2.6242e+06	3.43334e+06	4.42665e+06	7.66006e+07	7.8279e+06	2.40404e+08	7.82624e+07	3.18713e+08
TRUE	1-O-palmitoyl-2-O-arachidonoyl-sn-glycero-3-phosphocholine	C44 H81 N O8 P	No results	No results	No results	Full match	-4.4	782.567	783.573	11.756	1	0		No MS2	[M+H]+1	1.32171e+08	7.87017e+06	3.42705e+08	9.33214e+07	1.58651e+08	1.74844e+08	2.30636e+06	5.82114e+08	2.97579e+08	4.41429e+08	1.36588e+08	7.41015e+06	1.25966e+08	1.29953e+08	2.85025e+08	1.12936e+08	5.82609e+06	1.81637e+08	1.53679e+08	622347	599387	595565	6.36641e+07	9.2538e+07	2.01412e+08	8.74738e+07	1.16421e+08	1.24901e+08	7.1321e+06	9.15191e+07	1.64863e+08	7.56343e+07	1.87144e+08	5.6496e+07
TRUE		C46 H74 N9 P	Full match	No results	No results	No match	-0.83	783.58	784.587	11.907	48	0		No MS2	[M+H]+1	1.01876e+08	1.96385e+07	3.77049e+08	1.55425e+08	2.10302e+08	1.89912e+08	2.38405e+07	6.15361e+08	3.47652e+08	3.23689e+08	1.15177e+08	3.70447e+06	1.61942e+08	1.54721e+08	2.22466e+08	1.17818e+08	3.1582e+07	2.20847e+08	1.83194e+08	724187	750170	712311	9.05585e+07	1.24922e+08	3.3624e+08	1.34853e+08	1.36437e+08	1.57741e+08	7.01268e+06	1.12718e+08	1.66285e+08	7.58675e+07	2.99851e+08	1.37607e+08
TRUE		C32 H69 N10 O5 P	Full match	No results	No results	No results	1.37	704.52	705.527	11.366	0	0		No MS2	[M+H]+1	2.78832e+06	6.98479e+07	1.48486e+08	1.84759e+08	3.34905e+07	2.21148e+06	4.65803e+07	4.23139e+07	5.04247e+06	4.34678e+07	3.26592e+06	5.47964e+06	4.85356e+06	2.26831e+07	1.9869e+07	2.90259e+06	1.12851e+08	9.5926e+06	2.04141e+07	1.43164e+06	1.4473e+06	1.61815e+06	6.76293e+07	1.77076e+06	1.85442e+06	1.72271e+06	1.78923e+06	1.657e+06	2.16424e+06	1.20853e+08	3.67309e+06	2.07395e+07	3.61564e+07	2.12085e+08
TRUE		C26 H53 N4 O2 P S	Full match	No results	No results	No results	4.28	516.365	517.372	10.811	0	0		DDA for preferred ion	[M+H]+1	2.95951e+07	1.5734e+08	3.80891e+07	1.19818e+08	9.93121e+07	1.02236e+08	1.83712e+08	7.66219e+08	2.58113e+07	1.53623e+08	4.51818e+07	1.47447e+08	4.94436e+07	1.85049e+08	2.11694e+08	3.48151e+07	2.97912e+08	8.00519e+07	4.00521e+07	3.02157e+06	3.73387e+06	3.66137e+06	1.61905e+07	1.59024e+07	1.49982e+07	1.62636e+07	1.43601e+07	1.81545e+07	1.55053e+07	8.95354e+07	1.17591e+08	5.08817e+07	6.15699e+07	2.56331e+07
TRUE		C32 H78 N9 O6 P3	Full match	No results	No results	No match	1.77	777.53	778.537	13.042	49	0		No MS2	[M+H]+1	622890	2.4377e+08	1.41125e+08	7.22925e+07	6.18199e+07	371402	5.56806e+07	1.56359e+08	3.68059e+07	1.20615e+08	536105	1.12726e+08	1.7689e+08	2.05537e+08	7.65701e+08	622668	1.35518e+08	6.05868e+08	8.68873e+07	326739	270654	290268	1.47014e+07	342037	323551	419095	405396	387130	377768	1.52133e+08	563064	1.74677e+08	8.48753e+07	1.34977e+08
TRUE		C19 H43 O P3	Full match	No results	No results	No results	-2.96	380.252	778.537	13.045	0	0		No MS2	[2M+NH4]+1	490283	1.96776e+08	1.41125e+08	7.22925e+07	5.03131e+07	292334	5.56806e+07	1.32333e+08	3.68059e+07	1.16975e+08	421973	1.12726e+08	1.7689e+08	2.05537e+08	7.65701e+08	490107	1.35518e+08	6.05868e+08	8.68873e+07	257179	213034	228472	1.47014e+07	269220	254670	329874	319091	304714	297345	1.52133e+08	443192	1.74677e+08	7.67857e+07	1.34977e+08
TRUE		C37 H73 N8 O4 P	Full match	No results	No results	No results	2.55	724.551	725.558	13.02	0	0		No MS2	[M+H]+1	727637	7.6566e+08	4.89037e+08	2.62722e+08	2.00034e+08	1.19415e+06	5.10677e+08	4.35445e+08	3.9884e+08	4.11556e+08	1.17248e+06	1.56254e+08	3.14981e+08	1.91926e+08	3.18962e+08	727377	2.34132e+08	2.93931e+08	1.23148e+08	308226	344166	317066	7.98764e+07	475641	515706	508395	492808	452231	432604	1.31728e+08	810079	1.54191e+08	1.33185e+08	2.47279e+08
TRUE		C24 H40 O8	Full match	No results	No results	No results	-3.35	456.271	457.278	10.058	0	0		DDA for preferred ion	[M+H]+1	1.69105e+07	2.68558e+08	7.62781e+08	8.74182e+07	2.92961e+07	3.25888e+08	4.15858e+07	3.32992e+07	3.11957e+07	2.85368e+07	2.85696e+08	7.2774e+08	6.6606e+07	4.19446e+07	1.03273e+08	486785	4.24554e+07	2.2753e+07	8.20431e+07	851785	558559	343346	1.21436e+07	1.13713e+07	1.03262e+07	1.0689e+07	1.29278e+07	1.35001e+07	1.17461e+07	3.48939e+07	389246	3.99073e+08	1.3789e+07	4.96188e+07
TRUE		C25 H38 N P S	Full match	No results	No results	No results	-4.99	415.244	457.278	10.056	0	0		DDA for other ion	[M+ACN+H]+1	1.69105e+07	2.68558e+08	7.62781e+08	8.74182e+07	2.92961e+07	3.25888e+08	4.15858e+07	3.32992e+07	3.11957e+07	2.85368e+07	2.85696e+08	7.2774e+08	6.6606e+07	4.19446e+07	1.03273e+08	1.52834e+08	4.24554e+07	2.2753e+07	8.20431e+07	872422	558559	343346	1.21436e+07	1.13713e+07	1.03262e+07	1.0689e+07	1.29278e+07	1.35001e+07	1.16609e+07	3.48939e+07	1.65326e+07	3.99073e+08	1.3789e+07	4.96188e+07
TRUE	Linoleyl carnitine	C25 H45 N O4	Full match	No results	No results	Full match	1.45	423.335	424.343	9.798	3	0		No MS2	[M+H]+1	1.3126e+08	2.37258e+08	1.24605e+08	2.37865e+07	1.20581e+08	2.51312e+07	5.05542e+07	8.76603e+07	6.19251e+07	9.04457e+07	2.72236e+07	1.4446e+07	1.44295e+07	8.1083e+06	1.66865e+06	4.32721e+06	3.74384e+06	3.00109e+06	5.0113e+06	180054	200947	212440	7.1271e+06	6.19902e+06	6.45237e+06	5.81436e+06	7.25227e+06	8.20796e+06	6.21412e+06	4.89181e+07	1.42701e+08	1.64172e+08	2.02761e+08	3.10045e+08
TRUE		C45 H74 N5 O4 P	Full match	No results	No results	No match	0	779.548	780.555	12.863	57	0		No MS2	[M+H]+1	8.74932e+06	2.71587e+08	3.47333e+07	2.64695e+08	1.12204e+08	4.59956e+06	3.87689e+07	2.43544e+08	9.09967e+07	2.3676e+08	9.80517e+06	2.55676e+08	1.78401e+08	2.09963e+08	1.93039e+08	8.59234e+06	1.38701e+08	3.2551e+08	1.17007e+08	1.10436e+06	1.16998e+06	1.03597e+06	5.51305e+07	1.50348e+06	4.60468e+06	1.16545e+07	7.67619e+06	6.44112e+06	9.13408e+06	1.9265e+08	8.25512e+06	2.16073e+08	1.16606e+08	1.65375e+08
TRUE		C32 H78 N9 O6 P3	Full match	No results	No results	No match	1.36	777.53	778.537	12.871	49	0		No MS2	[M+H]+1	8.74932e+06	2.4377e+08	3.47333e+07	2.64695e+08	6.18199e+07	4.59956e+06	6.59113e+07	1.56359e+08	9.09967e+07	1.20615e+08	9.59753e+06	2.68327e+08	1.87219e+08	2.13707e+08	2.07574e+08	8.59234e+06	1.50749e+08	3.2551e+08	1.83935e+08	979700	1.03791e+06	919028	5.51305e+07	1.50348e+06	4.60468e+06	1.16545e+07	7.67619e+06	6.57434e+06	7.66943e+06	2.82225e+08	7.96102e+06	2.16073e+08	1.16606e+08	1.68543e+08
TRUE		C37 H75 N9 O6 P2	Full match	No results	No results	No results	1.39	803.533	804.54	12.053	0	0		No MS2	[M+H]+1	1.47822e+06	1.76726e+06	1.7132e+06	1.23186e+06	1.08639e+06	956903	983581	2.00972e+06	1.4627e+06	1.20195e+06	8.14253e+06	1.53901e+07	1.37643e+06	3.13518e+06	2.80687e+06	1.00248e+06	1.82533e+06	1.43796e+06	1.13875e+06	448983	434271	465216	784853	910965	1.11708e+06	455754	491535	946310	804068	1.24195e+06	1.18293e+06	853978	4.26521e+07	1.11155e+07
TRUE		C34 H69 N3 O6 P2	Full match	No results	No results	No match	-2.72	677.464	678.472	12.714	2	0		No MS2	[M+H]+1	880451	915893	856991	1.00872e+06	1.08462e+06	878345	925774	929361	901721	954835	1.10339e+06	1.13041e+06	700593	775249	853141	1.13773e+06	871220	893387	920106	688189	704057	766719	734380	718319	827572	780480	701981	766522	850151	904704	1.17132e+06	764402	5.3901e+06	952621
TRUE		C64 H97 N6 O6 P3	Full match	No results	No results	No results	-0.4	1138.67	570.341	10.596	0	0		No MS2	[M+2H]+2	432798	1.67946e+08	968033	2.67148e+06	367361	472914	1.5497e+06	9.75989e+07	1.9457e+08	451781	599221	7.61538e+08	857563	2.21893e+08	960331	5.06271e+06	3.897e+06	1.76643e+08	446511	271259	261657	256508	2.62261e+06	3.37908e+06	3.85703e+06	4.04888e+06	4.21082e+06	5.23352e+06	6.91598e+06	2.5283e+06	1.65651e+08	360003	521878	543616
TRUE		C66 H87 N9 O6 S	Full match	No results	No results	No results	-0.21	1133.65	567.832	10.597	0	0		DDA for other ion	[M+2H]+2	512219	1.67946e+08	968033	2.67148e+06	434773	559697	1.05193e+07	1.06581e+08	1.9457e+08	534686	709182	7.61538e+08	857563	2.21893e+08	960331	5.06271e+06	3.897e+06	1.33866e+08	528448	321037	309673	303578	1.70272e+07	1.82238e+07	1.80325e+07	1.57495e+07	4.21082e+06	2.2985e+07	2.6761e+07	2.5283e+06	1.46996e+08	426065	617646	643373
TRUE		C3 H5 O11 P	Full match	No results	No results	No results	3.7	247.958	246.951	7.408	0	0		DDA for preferred ion	[M-H]-1	5.82961e+07	3.35888e+08	7.76359e+07	1.69719e+07	2.25151e+08	780751	1.5264e+08	2.84132e+07	2.6441e+08	1.95495e+08	2.15491e+07	2.40119e+08	4.44633e+07	5.45332e+07	5.92803e+07	1.13866e+06	5.15265e+07	6.86857e+07	7.2921e+07	12223.4	12706.4	12779	1.10116e+07	1.09264e+07	1.38464e+07	1.3899e+07	1.07907e+07	1.46881e+07	1.35034e+07	9.89333e+07	7.60909e+08	2.3546e+06	4.11767e+07	1.9019e+07
TRUE		C4 H2 N2 O P2 S	Full match	No results	No results	No results	1.52	187.937	246.95	7.376	0	0		DDA for other ion	[M-H+HAc]-1	5.82961e+07	3.35888e+08	7.76359e+07	1.69719e+07	2.25151e+08	780751	1.5264e+08	2.84132e+07	2.6441e+08	1.95495e+08	2.15491e+07	2.40119e+08	4.44633e+07	5.45332e+07	5.92803e+07	1.13866e+06	5.15265e+07	6.86857e+07	7.2921e+07	17136.7	17918.7	17915.5	1.10116e+07	1.09264e+07	1.38464e+07	1.3899e+07	1.07907e+07	1.46881e+07	1.35034e+07	9.89333e+07	7.60909e+08	2.3546e+06	4.11767e+07	1.9019e+07
TRUE		C40 H77 N6 O2 P	Full match	No results	No results	No match	0.3	704.585	705.592	13.605	3	0		No MS2	[M+H]+1	1.16651e+06	2.20839e+08	2.73721e+08	1.46582e+08	2.10316e+08	1.32733e+06	3.08253e+08	2.36236e+08	7.59781e+08	2.81558e+08	1.49539e+06	2.36833e+08	4.73921e+08	2.85205e+08	7.50248e+08	1.96346e+06	1.83576e+08	1.88069e+08	1.3219e+08	928709	944182	923376	1.28156e+08	1.05549e+06	1.12804e+06	1.12024e+06	1.2411e+06	1.15479e+06	1.08273e+06	1.73816e+08	1.89029e+06	3.55347e+06	1.61591e+08	1.95865e+08
TRUE	3-(Icosanoyloxy)-4-(trimethylammonio)butanoate	C27 H53 N O4	Full match	No results	No results	Full match	1.84	455.398	456.406	10.429	1	0		DDA for preferred ion	[M+H]+1	6.00095e+08	3.32007e+08	3.2851e+08	2.16058e+08	8.75083e+07	7.34262e+07	1.50235e+08	1.66654e+08	3.02477e+08	1.10341e+08	3.68357e+07	1.44093e+07	1.1056e+07	1.3849e+07	7.80994e+06	7.42352e+06	3.09971e+07	6.01147e+06	1.00906e+07	230485	210693	232095	2.4116e+07	1.90987e+07	2.40416e+07	2.04414e+07	2.33204e+07	2.33134e+07	2.40761e+07	4.61759e+07	4.33161e+08	1.36159e+08	3.42585e+08	4.84015e+08
TRUE		C16 H36 N8 O10	Full match	No results	No results	No results	-4.59	500.253	533.287	10.353	0	0		No MS2	[M+H+MeOH]+1	1.26935e+06	1.7617e+08	2.28025e+08	1.62145e+08	1.04926e+08	1.15155e+06	8.10641e+07	5.55423e+07	1.24537e+08	1.48988e+08	1.65197e+06	2.71322e+07	7.02745e+07	2.18142e+07	6.96902e+07	1.2729e+06	4.86102e+07	1.10284e+08	3.30284e+07	792500	983458	828962	1.18781e+07	1.17865e+06	1.11496e+06	1.13218e+06	1.02801e+06	1.00865e+06	1.26722e+06	8.30135e+07	1.43075e+06	3.04734e+08	1.71021e+08	2.34504e+08
TRUE		C7 H14 N6 O3	Full match	No results	No results	No results	3.68	230.114	231.121	5.987	0	0		DDA for preferred ion	[M+H]+1	7.38224e+08	7.20139e+08	7.46547e+08	7.04819e+08	6.92307e+08	7.52585e+08	7.41604e+08	6.88346e+08	6.37178e+08	6.996e+08	6.78099e+08	7.10461e+08	3.30301e+08	7.16106e+08	5.73319e+08	7.09196e+08	7.1479e+08	6.26468e+08	6.17183e+08	924311	835225	861166	5.39847e+07	5.96517e+07	6.06739e+07	6.19277e+07	1.88303e+07	6.669e+07	6.43639e+07	6.88063e+08	3.81389e+08	6.79194e+08	6.69266e+08	6.96221e+08
TRUE	4-Undecylbenzenesulfonic acid	C17 H28 O3 S	Full match	No results	No results	Full match	1.69	312.176	311.169	14.73	1	0		DDA for preferred ion	[M-H]-1	1.22644e+07	7.44454e+06	5.27089e+06	5.78348e+06	5.19508e+06	9.60591e+06	5.36755e+06	4.65351e+06	4.75301e+06	3.12038e+06	9.64455e+06	3.42303e+07	1.91386e+07	1.34138e+07	9.38004e+06	2.1078e+07	2.77026e+07	1.93949e+07	2.48931e+07	2.61476e+07	2.91809e+07	2.59649e+07	9.61213e+06	5.63533e+06	3.40787e+06	2.8415e+07	1.16907e+07	1.02022e+07	3.89998e+07	2.75025e+07	1.12325e+08	3.43026e+07	1.99908e+07	1.52953e+07
TRUE		C26 H44 N7 O5 P	Full match	No results	No results	No match	2.34	565.315	566.323	10.964	1	0		DDA for preferred ion	[M+H]+1	3.74573e+08	3.46814e+08	4.85141e+08	1.39753e+08	2.50139e+08	1.80776e+08	9.09468e+07	2.2231e+08	3.25831e+08	4.30786e+08	5.47006e+08	1.73055e+08	1.3687e+08	1.02124e+08	4.74961e+07	8.69137e+07	7.91028e+07	5.79013e+07	7.26734e+07	325683	349573	369365	2.41802e+07	2.47118e+07	2.43575e+07	2.47225e+07	2.03705e+07	3.03531e+07	2.56982e+07	4.8135e+08	5.84046e+08	5.23219e+08	5.5335e+08	7.5397e+08
TRUE		C85 H162 N10 O18 P2 S4	Full match	No results	No results	No results	0.87	1801.04	601.355	9.031	0	0		DDA for other ion	[M+3H]+3	2.35502e+07	3.30941e+07	1.64644e+06	1.81283e+06	2.54718e+06	7.08313e+06	1.92887e+06	6.69314e+06	3.24049e+06	4.62266e+06	1.26315e+08	3.92407e+07	3.94339e+06	4.76637e+07	1.10202e+07	3.27485e+08	3.64042e+06	1.04568e+07	2.25313e+07	1.99107e+06	2.3207e+06	1.40835e+06	1.92898e+07	2.05906e+07	2.29883e+07	2.01925e+07	2.43059e+07	2.2825e+07	2.32347e+07	777612	4.21321e+06	5.47812e+06	9.76162e+07	2.31947e+08
TRUE		C36 H81 N10 O3 P3 S	Full match	No results	No results	Invalid mass	1.44	826.544	827.551	11.844	1	0		No MS2	[M+H]+1	2.04496e+07	1.35743e+06	1.36107e+06	1.29319e+06	3.86403e+06	6.34846e+06	4.06834e+06	4.01004e+06	4.07052e+06	1.28636e+06	1.49463e+07	7.84758e+07	2.57483e+07	1.15338e+07	4.11154e+06	4.93182e+07	1.20166e+07	5.31654e+06	9.02306e+06	863466	730268	803392	886318	960542	885026	965256	1.0076e+06	957192	1.0616e+06	1.38764e+07	4.85074e+06	3.52936e+06	2.86259e+08	1.24765e+08
TRUE		C34 H75 N10 O5 P	Full match	No results	No results	No match	1.47	734.567	735.574	11.051	2	0		No MS2	[M+H]+1	7.84912e+06	4.082e+06	2.72279e+06	6.33188e+07	6.58833e+06	8.17818e+06	2.23663e+06	3.78809e+06	7.77553e+06	8.11963e+06	3.9629e+06	5.81134e+06	4.28382e+06	1.09148e+07	1.4004e+07	4.17461e+06	2.4377e+06	3.96079e+06	6.68796e+06	1.41507e+06	1.32696e+06	1.4586e+06	7.15913e+06	2.13201e+06	6.11451e+06	1.04144e+07	3.70368e+06	1.91277e+06	4.23516e+08	3.7208e+07	6.94476e+06	2.72979e+06	3.12692e+07	2.65306e+06
TRUE		C34 H75 N10 O5 P	Full match	No results	No results	No match	2.43	734.568	735.575	11.244	1	0		No MS2	[M+H]+1	1.44932e+06	1.46353e+06	1.4504e+06	6.3038e+06	1.1505e+06	1.58668e+06	1.13351e+06	1.55771e+06	7.77553e+06	8.11963e+06	1.49804e+06	1.93437e+06	1.44505e+06	2.87626e+06	1.52143e+06	1.76363e+06	1.41418e+06	2.05425e+06	1.8553e+07	876119	850249	778463	2.67472e+06	2.13201e+06	1.79573e+06	2.50497e+06	1.30039e+06	1.00185e+06	5.20968e+07	1.53623e+06	1.61791e+06	1.37044e+06	1.65277e+06	1.59235e+06
TRUE		C34 H75 N10 O5 P	Full match	No results	No results	No match	1.6	734.567	735.574	11.362	2	0		No MS2	[M+H]+1	2.08475e+06	2.56355e+06	4.741e+06	1.1853e+07	1.58889e+06	1.65345e+06	1.68333e+06	2.15398e+06	2.20917e+06	8.11963e+06	2.44183e+06	2.25801e+06	9.41759e+06	2.87106e+07	1.47032e+07	2.14698e+07	2.17378e+06	4.36623e+07	1.8553e+07	1.0704e+06	1.08211e+06	1.20984e+06	1.49931e+06	1.32394e+06	1.71835e+06	1.29795e+06	1.78917e+06	1.23889e+06	5.25847e+07	8.67485e+06	2.74626e+06	3.04469e+06	2.08596e+07	2.9075e+06
TRUE	(3β,5α,22S,23S)-22,23-Epoxystigmasta-8,14-dien-3-ol	C29 H46 O2	Full match	No results	Partial match	Full match	2.03	426.351	427.358	11.721	8	0		DDA for preferred ion	[M+H]+1	5.03537e+07	1.5575e+07	8.68151e+06	6.55836e+06	598559	9.23044e+06	5.39326e+06	1.31305e+08	2.7037e+07	3.45435e+07	7.50938e+08	1.71032e+08	1.95523e+08	3.71162e+08	1.30314e+08	1.90757e+08	2.48256e+08	2.79744e+08	2.89991e+08	286694	306775	273883	1.81852e+07	1.49249e+07	1.3718e+07	1.56466e+07	1.37604e+07	1.56646e+07	1.70915e+07	1.88594e+07	8.55614e+07	7.8203e+07	9.85372e+07	4.18418e+07
TRUE		C40 H86 N3 O6 P3 S	Full match	No results	No results	No match	1.71	829.546	830.554	11.775	1	0		No MS2	[M+H]+1	1.02733e+07	1.38225e+06	1.6465e+06	1.04383e+06	3.48693e+06	4.77898e+06	4.21679e+06	4.01004e+06	4.07052e+06	1.63486e+06	9.91922e+07	7.84758e+07	3.64418e+07	1.15338e+07	3.94781e+06	1.12064e+07	7.87571e+06	4.0637e+06	5.89825e+06	649364	558051	621420	727636	738861	658509	690408	692172	655051	818215	1.02515e+07	4.14321e+06	3.52936e+06	2.86259e+08	8.09586e+07
TRUE	Ethyl myristate	C16 H32 O2	Full match	Full match	Partial match	Not the top hit	0.64	256.24	255.233	12.065	32	2	10	DDA for preferred ion	[M-H]-1	3.23963e+08	2.26541e+08	2.32918e+08	1.19909e+08	4.0198e+07	7.40227e+07	6.52745e+07	2.98881e+08	2.71701e+08	3.33369e+08	2.7663e+08	4.23662e+08	2.74297e+08	1.6551e+08	4.57897e+08	1.62115e+08	2.12605e+08	7.40836e+08	2.0464e+08	2.53608e+07	2.28954e+07	2.96789e+07	3.48992e+07	3.28808e+07	3.18894e+07	3.81478e+07	3.57161e+07	3.35227e+07	2.5452e+07	1.67203e+08	4.29127e+08	1.47958e+08	4.58659e+08	3.40172e+08
TRUE	PC	C46 H84 N O8 P	Full match	No results	No results	Full match	1.02	809.594	810.602	12.988	46	0		DDA for preferred ion	[M+H]+1	1.9628e+08	7.51783e+06	1.47093e+08	3.73971e+07	1.81872e+08	1.64345e+08	5.60874e+06	2.97511e+08	1.15528e+08	3.20672e+08	2.03653e+08	8.37445e+06	4.2788e+07	7.88148e+07	1.56763e+08	6.80955e+07	2.03912e+07	4.48313e+07	6.93883e+07	1.36318e+06	1.2511e+06	1.22212e+06	1.84694e+07	1.47474e+08	3.42831e+08	1.38322e+08	6.73893e+07	1.18916e+08	4.7368e+08	7.00177e+07	5.11164e+07	2.02961e+07	4.6759e+07	6.19001e+07
TRUE	Choline	C5 H13 N O	Full match	Full match	No results	No results	3.36	103.1	104.107	0.968	0	1	8.9	DDA for preferred ion	[M+H]+1	6.02171e+08	7.46811e+08	5.00267e+08	4.45314e+08	3.85789e+08	3.68537e+08	2.40203e+08	3.41928e+08	7.21722e+08	6.51587e+08	2.03487e+08	2.3159e+08	2.69446e+08	4.60393e+07	1.21736e+07	1.83284e+08	2.48142e+08	3.90778e+08	1.94459e+08	108261	291607	91736.9	2.87169e+08	2.9667e+08	2.84219e+08	3.14751e+08	2.64381e+08	2.99658e+08	3.32679e+08	4.27237e+08	5.07268e+08	3.23983e+08	6.26974e+08	5.95968e+08
TRUE		C6 H10 N6 O2	Full match	No results	No results	No results	3.9	198.087	231.121	6.077	0	0		DDA for other ion	[M+H+MeOH]+1	3.25166e+08	7.20139e+08	7.46547e+08	7.04819e+08	6.92307e+08	2.94525e+08	7.41604e+08	6.88346e+08	6.37178e+08	6.996e+08	6.78099e+08	7.10461e+08	6.9186e+08	7.16106e+08	5.73319e+08	7.09196e+08	7.1479e+08	6.26468e+08	2.49268e+08	445795	448011	537154	5.39847e+07	5.96517e+07	6.06739e+07	2.12565e+07	5.7432e+07	2.55158e+07	6.43639e+07	6.88063e+08	7.28005e+08	2.15788e+08	2.80019e+08	6.96221e+08
TRUE	Progesterone	C21 H30 O2	Full match	No results	Not the top hit	Full match	1.66	314.225	315.232	10.078	24	0		No MS2	[M+H]+1	796442	325578	460621	329754	402057	337657	374958	2.09917e+07	2.84004e+07	2.80389e+07	3.6385e+06	2.30294e+06	2.6957e+06	3.51924e+06	3.70221e+06	2.58202e+06	1.834e+06	3.00111e+08	2.90481e+08	231712	215953	225921	3.26568e+06	3.53934e+06	3.48611e+06	3.05359e+06	3.53531e+06	4.43369e+06	3.23352e+06	380984	5.12371e+07	383533	603094	586549
TRUE		C15 H13 N3 O6 S	Full match	No results	No results	No results	1.91	363.053	364.061	6.752	0	0		DDA for preferred ion	[M+H]+1	3.84849e+08	2.60069e+08	2.07033e+08	1.22971e+08	1.62377e+08	4.20604e+07	1.15407e+08	3.06937e+08	3.11917e+08	2.48887e+08	1.42997e+08	2.185e+08	1.04359e+08	1.95293e+08	5.67103e+07	7.96868e+07	3.27469e+07	9.15609e+07	1.08391e+08	125759	116475	125362	3.29852e+06	3.93071e+06	2.00181e+06	3.51345e+06	829631	4.57873e+06	4.85915e+06	3.63978e+08	3.05597e+08	1.09542e+08	1.37461e+08	1.70274e+08
TRUE		C40 H82 N4 O3 P2	Full match	No results	No results	No match	-1.78	728.585	729.592	13.544	9	0		No MS2	[M+H]+1	1.20318e+06	1.42995e+08	5.7592e+07	5.39944e+07	3.42158e+07	1.72091e+06	6.41563e+07	6.26559e+07	2.55328e+07	8.45975e+07	9.68049e+06	6.42254e+08	3.90873e+08	2.45531e+08	3.18612e+08	5.91624e+07	2.33547e+08	3.79335e+08	3.33278e+08	648504	710276	671008	3.84149e+07	785458	836534	690138	763029	770706	746070	2.03755e+08	9.52554e+06	1.62551e+08	1.80853e+07	1.37654e+08
TRUE		C23 H53 N3 O3 P2	Full match	No results	No results	No match	-4.27	481.354	482.361	12.038	2	0		No MS2	[M+H]+1	2.48852e+07	5.33198e+06	2.78383e+07	5.55507e+06	942032	8.3453e+06	5.16832e+06	9.32205e+06	8.60698e+06	1.37471e+07	7.40892e+08	1.28917e+07	1.10385e+07	5.55448e+06	1.45598e+06	9.06431e+06	1.56585e+07	1.46859e+08	1.24436e+06	490623	474546	508362	1.35372e+06	4.32395e+07	1.22069e+06	3.73398e+07	1.01329e+06	4.61239e+07	878640	3.15238e+06	3.22864e+07	1.36999e+07	1.61826e+07	1.62625e+07
TRUE		C51 H73 N O5	Full match	No results	No results	No match	-1.54	779.548	780.555	12.056	57	0		No MS2	[M+H]+1	1.43785e+07	1.07023e+08	4.64679e+07	4.13062e+07	2.66555e+07	1.12398e+07	2.43302e+07	4.01387e+07	5.87352e+07	5.4751e+07	1.62419e+07	1.34788e+08	6.67047e+07	8.18635e+07	1.88524e+08	9.21093e+06	5.1765e+07	1.2689e+08	4.16489e+07	464456	449237	481249	1.54083e+07	7.01266e+06	1.01058e+07	1.89615e+07	1.00879e+07	2.01788e+07	7.90995e+06	4.26751e+07	1.68403e+07	1.54134e+08	5.40932e+07	1.02548e+08
TRUE		C35 H72 N7 O5 P	Full match	No results	No results	No match	1.35	701.534	780.555	12.051	15	0		No MS2	[M+DMSO+H]+1	1.01876e+08	1.07023e+08	4.64679e+07	4.13062e+07	2.66555e+07	8.22102e+07	2.43302e+07	4.01387e+07	5.87352e+07	5.4751e+07	1.15177e+08	1.34788e+08	8.5425e+07	8.18635e+07	1.88524e+08	4.26765e+07	5.1765e+07	1.2689e+08	4.16489e+07	442381	427885	458375	1.54083e+07	8.74742e+07	3.83962e+08	1.34853e+08	1.05053e+08	2.01788e+07	792244	4.26751e+07	1.09041e+08	7.56018e+07	5.40932e+07	1.03699e+08
TRUE	(18R,24S)-21,24,25-Trihydroxy-21-oxido-15-oxo-16,20,22-trioxa-21λ~5~-phosphapentacosan-18-yl (13Z,16Z)-13,16-docosadienoate	C43 H81 O10 P	No results	No results	No results	Full match	-2.89	788.554	789.562	11.751	14	0		No MS2	[M+H]+1	657086	698848	2.62588e+06	2.00498e+06	548182	527969	403469	597454	606248	1.73031e+06	660202	837331	1.5219e+07	4.30429e+07	1.56707e+07	9.31375e+06	504793	2.01773e+07	1.46937e+07	234221	282143	314181	367883	373558	332933	1.15496e+06	1.30915e+06	327114	2.191e+08	7.55831e+06	1.21409e+07	641645	4.3361e+07	3.51052e+06
TRUE		C32 H66 N3 O12 P	Full match	No results	No results	No match	4.77	715.442	716.449	12.565	6	0		No MS2	[M+H]+1	599305	551281	547959	574932	438495	538799	454871	900385	575920	564127	694820	631064	622471	446126	539526	669121	560311	612864	608710	429478	334570	346420	545459	382575	478377	422760	417817	421122	440251	509966	685961	575789	719900	756942
TRUE	Benzisothiazolone	C7 H5 N O S	Full match	No results	No results	Full match	1.87	151.009	152.017	7.844	2	0		No MS2	[M+H]+1	829438	941416	942283	636718	1.3372e+06	925602	393396	1.02352e+06	841897	1.29016e+06	8.5594e+06	1.9002e+07	3.0349e+07	4.1289e+06	2.33071e+06	2.20577e+08	2.34772e+06	1.17127e+06	2.10234e+07	1.53535e+06	1.42173e+06	1.34476e+06	2.27373e+06	2.36223e+06	2.34554e+06	2.09923e+06	2.29428e+06	1.95283e+06	2.98147e+06	6.83458e+07	1.66975e+06	1.03527e+06	4.72605e+06	6.37832e+06
TRUE		C39 H77 N9 O3 P2	Full match	No results	No results	No match	-0.36	781.562	764.558	11.453	62	0		No MS2	[M+H-H2O]+1	1.14792e+07	1.19826e+06	1.10161e+07	4.32148e+06	7.05837e+06	3.05619e+06	915971	2.53781e+06	6.76528e+06	4.82917e+07	2.87783e+07	1.3494e+06	4.79789e+08	6.46619e+08	5.37622e+08	6.10425e+07	1.17676e+06	7.35775e+08	3.02031e+08	653597	690938	683634	2.64258e+07	951864	3.9854e+06	4.58208e+08	4.3792e+07	6.69065e+06	2.14684e+07	3.83853e+08	4.19558e+07	1.02445e+06	2.74108e+07	2.59934e+07
TRUE		C48 H80 N P3	Full match	No results	No results	No match	-0.27	763.55	764.557	11.505	6	0		No MS2	[M+H]+1	1.14792e+07	852779	1.10161e+07	4.2423e+06	1.3781e+07	3.17135e+06	728503	2.53781e+06	5.75031e+06	2.66317e+07	1.36909e+07	2.06068e+07	4.79789e+08	6.46619e+08	5.37622e+08	1.78175e+08	829341	7.35775e+08	3.02031e+08	533343	501181	494720	3.60127e+07	4.85319e+06	3.9854e+06	4.58208e+08	1.59438e+07	6.69065e+06	1.35059e+07	3.83853e+08	4.19558e+07	1.0369e+06	3.09902e+07	2.59934e+07
TRUE	5α-Stigmastan-3,6-dione	C29 H48 O2	Full match	No results	Partial match	Full match	1.85	428.366	429.373	14.661	30	0		DDA for preferred ion	[M+H]+1	1.15514e+08	5.83254e+06	1.51426e+06	3.2947e+06	1.87528e+06	4.13259e+07	2.68168e+06	4.58583e+07	1.50201e+06	4.49444e+06	2.05951e+06	1.07827e+07	1.22855e+06	2.32806e+06	1.17234e+08	3.92703e+06	4.89395e+06	2.85696e+08	9.03143e+06	541157	458648	540381	7.18214e+07	4.60854e+06	2.89293e+06	2.90285e+06	4.70354e+06	2.63995e+06	4.08567e+08	8.06627e+07	4.97876e+06	2.69801e+06	3.14647e+06	3.04419e+06
TRUE	(2S,3S)-2-(Dimethylamino)-1,3-octadecanediol	C20 H43 N O2	Full match	No results	No results	Full match	2.35	329.33	330.337	9.532	1	0		DDA for preferred ion	[M+H]+1	3.85329e+08	2.80383e+08	3.12401e+08	3.01568e+08	2.6354e+08	4.45786e+08	4.14839e+08	3.32612e+08	3.5438e+08	3.94276e+08	3.97275e+08	4.01691e+08	4.86827e+08	4.55268e+08	6.04633e+08	6.17224e+08	6.41359e+08	5.39503e+08	6.24958e+08	2.33401e+07	2.21421e+07	2.33004e+07	3.41865e+08	3.36219e+08	3.50526e+08	2.89581e+08	3.25661e+08	2.60183e+08	2.71093e+08	5.49185e+08	4.94845e+08	2.74359e+08	2.74312e+08	4.1035e+08
TRUE		C11 H30 N6 S	Full match	No results	No match	No match	-0.39	278.225	279.232	10.455	76	0		No MS2	[M+H]+1	2.63057e+07	2.63653e+07	2.83464e+07	2.63893e+07	3.49132e+07	3.34983e+07	3.33509e+07	2.68299e+07	3.15809e+07	2.75517e+07	4.00225e+07	4.00972e+07	2.37589e+07	2.42111e+07	3.794e+07	4.98121e+07	3.5167e+07	3.41245e+07	2.63516e+07	6.8558e+06	3.00811e+07	6.29164e+06	9.48067e+06	1.02915e+07	4.56878e+07	8.96027e+06	1.23408e+07	8.53246e+06	2.19072e+07	4.89743e+07	4.82324e+07	2.52707e+07	1.63576e+08	5.15896e+07
TRUE		C34 H34 N4 O2	Full match	No results	No results	No match	-0.66	530.268	531.275	9.607	1	0		DDA for preferred ion	[M+H]+1	6.46804e+08	5.111e+08	5.84122e+08	6.94472e+08	6.02435e+08	5.65863e+08	6.43564e+08	5.69949e+08	4.60817e+08	6.07239e+08	4.79541e+08	4.97598e+08	5.75649e+08	5.4372e+08	6.5893e+08	6.05045e+08	5.31355e+08	5.29368e+08	6.3701e+08	158175	142660	130158	4.06618e+08	3.05464e+08	3.28513e+08	4.15476e+08	4.3011e+08	4.16458e+08	3.57781e+08	5.14987e+08	6.38419e+08	5.93806e+08	5.58594e+08	7.08191e+08
TRUE		C30 H33 N3 O2	Full match	No results	No results	No match	4.48	467.259	531.275	9.614	1	0		DDA for other ion	[M+ACN+Na]+1	6.46804e+08	5.111e+08	5.84122e+08	6.94472e+08	6.02435e+08	5.65863e+08	6.43564e+08	5.69949e+08	4.60817e+08	6.07239e+08	4.79541e+08	4.97598e+08	5.75649e+08	5.4372e+08	6.5893e+08	6.05045e+08	5.31355e+08	5.29368e+08	6.3701e+08	190348	207633	189985	4.06618e+08	3.05464e+08	3.28513e+08	4.15476e+08	4.3011e+08	4.16458e+08	3.57781e+08	5.14987e+08	6.38419e+08	5.93806e+08	5.58594e+08	7.08191e+08
TRUE	(3β)-Cholest-5-en-3-yl (5Z,8Z,12E,14Z)-11-hydroperoxy-5,8,12,14-icosatetraenoate	C47 H76 O4	No results	No results	No results	Full match	1.44	704.575	705.583	12.788	4	0		No MS2	[M+H]+1	783556	4.00274e+08	3.29762e+08	3.12598e+08	1.24267e+08	709141	4.68321e+08	2.54185e+08	3.35358e+08	3.1429e+08	804566	4.58888e+08	5.02316e+08	4.52025e+08	4.62107e+08	1.0204e+06	4.24377e+08	2.80213e+08	5.90614e+07	644311	585146	573525	6.73898e+07	733112	602548	676747	703829	627247	703606	3.31028e+08	880463	4.6307e+08	2.34084e+08	1.73787e+08
TRUE		C37 H73 N9 O3 P2	Full match	No results	No results	No match	1.52	753.532	754.54	11.718	61	0		No MS2	[M+H]+1	2.16913e+08	3.98486e+08	4.1718e+08	3.49142e+08	2.24217e+08	7.52378e+07	2.36139e+08	2.02293e+08	1.30457e+08	5.50095e+08	1.50085e+08	1.95234e+06	1.32895e+08	7.17197e+07	1.85579e+08	4.24573e+08	2.00493e+08	7.2337e+08	6.47339e+07	688994	737253	732553	3.39251e+07	7.43179e+07	2.96812e+08	1.50566e+08	4.48915e+08	2.18591e+08	4.04863e+07	1.07711e+08	5.83322e+08	1.90575e+08	8.18061e+07	3.85786e+08
TRUE		C26 H39 N7 O2	Full match	No results	No results	No match	3.12	481.318	482.325	10.832	5	0		DDA for other ion	[M+H]+1	1.68646e+07	7.23202e+08	6.3191e+07	2.52249e+07	1.79202e+07	6.8519e+06	2.02201e+07	1.00876e+07	4.24109e+07	2.31361e+07	2.80272e+07	1.10686e+07	1.3495e+07	9.00491e+06	1.83934e+07	6.40629e+06	8.88627e+06	7.35495e+06	9.09145e+06	511313	605232	536143	4.61443e+06	7.64504e+06	9.26332e+06	5.3202e+06	4.33906e+06	4.36689e+06	3.69327e+06	3.19966e+07	6.3448e+07	2.65435e+07	1.23788e+08	1.27018e+08
TRUE		C30 H61 N3 O6 P2	Full match	No results	No results	No results	-2.83	621.402	622.409	11.962	0	0		No MS2	[M+H]+1	2.73953e+07	2.86315e+06	3.46555e+06	518191	1.66724e+07	1.68119e+07	852720	3.89971e+06	9.27614e+06	604094	8.63603e+06	1.86951e+07	6.89455e+06	4.89653e+06	2.41931e+06	3.23211e+06	3.13361e+06	1.08024e+06	940231	417955	437737	383040	504867	434782	449457	512326	427117	461988	471542	1.53247e+07	1.29814e+07	1.58721e+06	5.7207e+08	2.53833e+08
TRUE		C41 H85 N5 O P2 S2	Full match	No results	No results	No match	-1.74	789.566	790.573	12.056	7	0		No MS2	[M+H]+1	1.08855e+08	1.7502e+07	2.33434e+08	2.04135e+08	1.65165e+08	8.17726e+07	9.32604e+06	3.50003e+08	1.70373e+08	2.08539e+08	1.08363e+08	1.29501e+07	6.63321e+08	6.89474e+08	4.79143e+08	1.23014e+08	2.15129e+07	7.21565e+08	3.76174e+08	345938	334602	358446	8.40166e+07	2.84288e+07	9.7633e+07	2.36486e+08	2.20564e+08	1.94614e+08	1.75403e+07	3.95363e+08	2.19346e+08	1.45575e+07	3.02999e+08	2.32152e+08
TRUE		C33 H54 N6 O8	Full match	No results	No results	No match	3	662.402	663.41	12.424	2	0		No MS2	[M+H]+1	1.58676e+06	1.2741e+06	2.31132e+06	582892	1.509e+06	5.31383e+06	1.26325e+06	658467	1.52807e+07	722900	1.43772e+07	1.79534e+07	2.5375e+07	814155	2.26494e+06	1.00983e+08	1.56146e+06	7.0125e+06	874079	467697	382996	480955	3.82786e+06	1.05578e+06	1.4338e+06	1.58049e+06	994569	1.86937e+06	2.53092e+06	1.51581e+07	5.51016e+06	9.06326e+06	814255	3.05652e+06
TRUE		C29 H62 N2 O12 S	Full match	No results	No results	No match	-0.27	662.402	663.409	12.622	2	0		No MS2	[M+H]+1	917777	2.14886e+06	2.31132e+06	893566	736618	1.75482e+06	735690	837600	5.73504e+06	922276	6.32676e+06	1.04587e+07	6.39381e+06	1.00745e+06	5.41089e+06	4.47415e+07	937497	4.62487e+06	1.18593e+06	644574	701010	598979	912649	1.07409e+06	803530	810008	994569	682066	3.491e+06	4.42939e+06	3.65076e+06	4.77726e+06	1.20452e+06	1.42624e+06
TRUE	Bis(2-ethylhexyl) phthalate	C24 H38 O4	Full match	No results	No results	Full match	2.63	390.278	391.285	1.085	63	0		No MS2	[M+H]+1	7.0979e+07	7.02095e+07	6.94633e+07	7.19891e+08	7.70282e+07	6.06999e+07	1.17224e+08	6.2429e+07	6.15612e+07	5.7355e+07	6.69209e+07	8.62086e+07	6.55077e+07	6.34486e+07	6.44864e+07	5.5619e+07	5.41244e+07	5.73707e+07	7.85134e+07	9.82377e+07	8.89592e+07	9.07527e+07	7.89825e+07	9.69828e+07	6.19285e+07	8.23906e+07	3.8834e+07	4.71914e+07	4.84394e+07	1.05567e+08	4.91954e+07	2.12133e+08	4.54436e+07	4.66311e+07
TRUE	1-oleoyl-sn-glycero-3-phospho-D-myo-inositol	C27 H51 O12 P	Full match	No results	No results	Full match	1.47	598.313	597.305	9.957	2	0		DDA for preferred ion	[M-H]-1	219452	1.48816e+08	1.71652e+08	1.76902e+08	8.25091e+07	203495	7.77444e+07	6.31136e+07	1.37811e+08	8.24992e+07	208143	6.4627e+07	4.37059e+07	9.69887e+07	9.11149e+07	193457	4.76035e+07	5.38963e+07	1.48002e+07	172905	189068	155644	1.38399e+07	193917	169087	180132	177661	179362	185744	3.76394e+07	212645	3.60504e+08	8.88171e+07	2.54728e+08
TRUE		C39 H77 N9 O5 P2	Full match	No results	No results	No match	1.84	813.554	814.561	13.574	16	0		No MS2	[M+H]+1	6.4161e+06	1.24727e+06	2.78217e+06	1.18867e+06	3.07782e+06	4.80726e+06	6.29526e+06	4.4063e+06	3.84673e+06	2.89907e+06	1.29292e+07	5.67294e+07	8.09384e+06	3.15172e+06	1.19089e+06	4.65223e+06	6.59237e+06	2.80302e+06	5.91348e+06	897287	982757	928424	1.13109e+06	1.08678e+06	1.15745e+06	1.04083e+06	1.14777e+06	1.11195e+06	3.79158e+06	2.83651e+06	2.52181e+07	3.57594e+06	2.55726e+08	1.01208e+08
TRUE		C45 H78 N5 O4 P	Full match	No results	No results	No match	0.24	783.579	784.587	14.847	48	0		No MS2	[M+H]+1	238635	3.36596e+06	3.4336e+07	925216	718947	4381.77	1962.24	176461	174110	238615	596739	3.45836e+06	2.31157e+07	5.3251e+07	3.37167e+07	4.34583e+06	4.55014e+07	1.23552e+07	1.0207e+07	1942.22	1962.79	2003.92	156047	21177.4	1972.4	592868	1.51617e+07	1.66404e+06	1.29122e+06	1.01619e+06	2.85703e+07	3.66407e+08	9.63426e+06	4563.54
TRUE		C42 H83 N5 O7 P2	Full match	No results	No results	No match	0.41	831.577	832.584	12.059	34	0		No MS2	[M+H]+1	1.30177e+08	2.91757e+06	2.93085e+08	1.8376e+08	1.07156e+08	6.29573e+07	793862	7.10781e+08	3.0125e+08	3.05494e+08	1.18285e+08	1.10478e+06	6.21007e+07	1.0805e+08	1.03699e+08	5.33047e+07	1.01702e+06	1.18918e+08	5.04947e+07	362380	350506	375482	7.08138e+07	7.7599e+07	2.39906e+08	2.83558e+07	1.41316e+08	1.95966e+08	3.64239e+07	3.8714e+07	1.32116e+08	689257	2.50894e+08	5.61414e+07
TRUE		C20 H40 N6 O4	Full match	No results	No results	No match	2.86	428.312	429.32	10.784	5	0		DDA for preferred ion	[M+H]+1	5.99429e+07	1.69879e+08	8.50925e+07	3.24561e+08	2.68712e+08	2.49427e+08	3.12701e+08	7.10205e+08	4.15202e+07	3.55501e+08	7.90597e+07	1.98475e+08	1.02072e+08	3.60706e+08	2.80177e+08	7.34083e+07	5.06841e+08	2.29695e+08	1.0103e+08	3.77301e+06	3.20319e+06	2.98865e+06	2.73949e+07	2.33602e+07	2.37776e+07	2.13743e+07	2.27279e+07	2.63701e+07	2.71369e+07	1.24847e+08	1.33533e+08	7.58892e+07	1.01626e+08	4.87175e+07
TRUE		C34 H76 N10 O P2	Full match	No results	No results	No match	1.9	702.569	703.576	13.037	7	0		No MS2	[M+H]+1	915788	4.93158e+08	6.12504e+08	6.42096e+07	3.32881e+08	1.18445e+06	5.08276e+08	4.54019e+08	4.27543e+08	3.56807e+08	4.1811e+06	4.15357e+08	4.90021e+08	1.82891e+08	5.85452e+08	915460	1.71132e+08	4.57901e+08	2.11091e+08	480379	397922	426758	1.23903e+08	1.47404e+06	3.85298e+06	616164	596022	569168	555404	2.6841e+08	827829	3.38625e+08	1.47925e+08	3.39707e+08
TRUE		C31 H46 N5 O9 P	Full match	No results	No results	No results	-0.22	663.303	332.659	6.493	0	0		DDA for other ion	[M+2H]+2	2.04332e+06	733815	734986	431147	1.85077e+06	3.41267e+06	8.60498e+06	2.07125e+06	6.7049e+06	788919	8.9001e+07	3.76593e+07	6.24694e+06	1.27841e+08	4.63685e+07	9.70388e+07	1.13422e+08	4.18211e+07	2.7721e+07	166280	154683	195064	1.31831e+06	3.15885e+06	1.46461e+06	3.75928e+06	4.02489e+06	1.71242e+06	1.1889e+06	1.98041e+07	1.11107e+06	289519	4.37596e+06	998548
TRUE		C28 H49 N4 O2 P S	Full match	No results	No results	No match	4.41	536.334	537.341	10.636	2	0		No MS2	[M+H]+1	4.97614e+07	2.24403e+07	2.52635e+07	1.03775e+07	1.11552e+07	2.26161e+07	9.16523e+06	1.4601e+07	1.71762e+07	1.71237e+08	9.28088e+07	4.74038e+07	1.12789e+08	1.86729e+07	3.67283e+07	2.58296e+08	1.41679e+07	1.93964e+07	6.81071e+07	6.85004e+06	2.50986e+07	1.79728e+07	1.05471e+07	1.34013e+07	1.6836e+07	1.88006e+07	2.65023e+07	3.05531e+07	3.2314e+07	6.24509e+07	2.34049e+07	8.06351e+07	2.82976e+07	4.22949e+07
TRUE	[Similar to: N-Acetyl-L-glutamine; ΔMass: 86.0737 Da]	C12 H22 N2 O5	Full match	Invalid mass	No results	No results	1.83	274.153	273.146	6.397	0	1		DDA for preferred ion	[M-H]-1	29918.5	1.75126e+06	27419.8	1.32645e+07	7.03822e+08	274529	553875	81780.7	6.43697e+07	1.98477e+06	18549.6	6.55223e+06	15338.3	1.11881e+07	2.4264e+06	3.22227e+06	2.09056e+06	469812	3.64511e+06	14168.4	14257.6	14086.6	1.18898e+07	1.72676e+07	5.81219e+06	1.68948e+07	3.88225e+06	1.97614e+07	1.55666e+07	5.22576e+06	3.95639e+08	1.60904e+06	1.14286e+07	1.49976e+07
TRUE	(1′R,2S,4′S,5S,6R,8′R,10′E,12′S,13′S,14′E,16′E,20′R,21′R,24′S)-6-[(2S)-2-Butanyl]-24′-hydroxy-21′-methoxy-5,11′,13′,22′-tetramethyl-2′-oxo-5,6-dihydrospiro[pyran-2,6′-[3,7,19]trioxatetracyclo[15.6.1.1 ~4,8~.0~20,24~]pentacosa[10,14,16,22]tetraen]-12′-yl 2,6-dideoxy-3-O-methyl-α-L-arabino-hexopyranoside	C42 H62 O11	Full match	No results	No results	Full match	2.19	742.431	743.438	10.623	1	0		DDA for other ion	[M+H]+1	550287	8.45746e+07	509550	1.45196e+06	555457	520183	1.26793e+06	5.46014e+07	1.11386e+08	582440	2.58225e+06	7.03278e+08	4.19678e+06	2.05086e+08	780149	2.08843e+07	1.51094e+06	1.73271e+08	1.25977e+06	291465	292254	275615	2.57639e+06	2.02714e+06	2.35038e+06	2.85423e+06	2.61462e+06	2.74023e+06	3.7957e+06	3.69763e+06	7.03713e+07	938077	560752	612736
TRUE		C57 H95 N2 O16 P	Full match	No results	No results	No results	-0.39	1094.64	548.328	10.596	0	0		No MS2	[M+2H]+2	483873	1.71074e+08	1.5486e+06	2.72071e+06	410713	880992	3.2071e+06	9.79395e+07	1.87133e+08	505096	1.29496e+06	6.98145e+08	2.45361e+06	2.0922e+08	980052	5.11227e+06	2.79699e+06	1.65957e+08	499204	593623	292536	628065	4.79025e+06	4.14224e+06	6.0967e+06	5.81434e+06	4.68723e+06	8.60949e+06	7.78878e+06	4.74231e+06	1.47437e+08	402487	583466	607769
TRUE		C34 H78 N8 O6 P2	Full match	No results	No results	No results	-1.17	756.551	757.558	12.835	0	0		No MS2	[M+H]+1	1.00348e+07	6.68655e+07	7.3996e+07	3.95496e+07	1.77744e+07	7.60897e+06	1.35578e+08	2.31328e+07	1.38438e+07	2.46622e+07	5.04682e+06	4.37695e+07	2.49253e+07	1.98647e+07	2.76843e+07	1.20332e+06	4.84028e+07	2.71575e+07	1.57701e+07	975581	1.00002e+06	885480	9.18249e+06	1.46714e+06	3.15467e+06	1.13672e+06	1.53381e+06	992653	1.11664e+06	2.61657e+07	7.31437e+06	7.52693e+07	3.56278e+07	4.22301e+07
TRUE		C24 H58 N10 O10 S	Full match	No results	No results	No results	-0.5	678.405	679.413	8.968	0	0		No MS2	[M+H]+1	1.05631e+07	1.86112e+07	1.26123e+06	1.60322e+06	2.89292e+06	4.16802e+06	1.5763e+06	4.55369e+06	1.95185e+06	2.39639e+06	5.31599e+07	2.60666e+07	3.93503e+06	1.29701e+07	5.31333e+06	1.12601e+08	5.94702e+06	4.54542e+06	6.07985e+06	5.46012e+06	4.90428e+06	4.88416e+06	1.30834e+07	9.50374e+06	1.41297e+07	9.03746e+06	1.06048e+07	1.46561e+07	8.16343e+06	4.10967e+06	3.07535e+06	2.99948e+06	2.10763e+07	1.1416e+08
TRUE		C12 H30 N5 O4 P	Full match	No results	No results	No results	-3	339.203	679.412	8.966	0	0		No MS2	[2M+H]+1	1.05631e+07	1.86112e+07	1.26123e+06	1.60322e+06	2.80559e+06	4.16802e+06	1.5763e+06	4.55369e+06	1.95185e+06	2.39639e+06	5.31599e+07	2.60666e+07	3.93503e+06	1.29701e+07	5.18355e+06	1.12601e+08	5.94702e+06	4.54542e+06	6.07985e+06	5.50752e+06	4.87284e+06	4.79705e+06	1.30834e+07	9.50374e+06	1.41297e+07	9.03746e+06	1.06048e+07	1.46561e+07	8.16343e+06	4.10967e+06	2.42444e+06	2.7335e+06	2.10763e+07	1.1416e+08
TRUE	Isoxaben	C18 H24 N2 O4	Full match	No results	No results	Full match	2.92	332.175	333.182	1.061	1	0		No MS2	[M+H]+1	866932	932949	784532	1.06177e+06	1.92539e+06	963485	3.14446e+07	1.28626e+06	584874	830139	1.41471e+06	1.92526e+06	926583	360692	1.51432e+06	408701	6.95109e+08	746927	3.0971e+06	52677.6	44546.1	52173.6	2.51803e+06	1.42393e+06	1.64474e+06	669270	2.59642e+06	3.22784e+06	2.38868e+06	240783	790984	711848	778435	1.1729e+06
TRUE	Amide C18	C18 H37 N O	Full match	No results	No results	Full match	1.99	283.288	284.295	12.108	2	0		DDA for other ion	[M+H]+1	1.03385e+08	8.86894e+07	1.00268e+08	1.05917e+08	7.24598e+07	1.3676e+08	1.53237e+08	8.6799e+07	6.89283e+07	9.30281e+07	1.43789e+08	3.44227e+08	2.49316e+08	1.55301e+08	2.56581e+08	2.74099e+08	2.05549e+08	2.74819e+08	2.52575e+08	4.53797e+07	5.1977e+07	4.70757e+07	6.87995e+07	5.74547e+07	5.48231e+07	6.25464e+07	6.53123e+07	5.66812e+07	5.00114e+07	1.43843e+08	1.00025e+08	6.94297e+07	8.14068e+07	8.07011e+07
TRUE		C37 H52 N10 O7	Full match	No results	No results	No match	0.44	748.402	749.41	9.936	2	0		No MS2	[M+H]+1	2.14629e+06	3.14549e+08	1.54728e+06	1.36704e+07	1.04165e+06	2.55241e+06	4.72954e+06	2.39202e+08	2.85058e+08	651871	2.51314e+06	6.89476e+08	2.86557e+06	4.12469e+08	4.40751e+06	1.00934e+07	7.94271e+06	2.60722e+08	1.07301e+06	273381	248085	201462	1.18786e+07	1.13042e+07	1.09599e+07	1.11091e+07	1.15594e+07	1.15369e+07	1.33864e+07	8.0591e+06	2.47174e+08	638279	2.84513e+06	4.29143e+06
TRUE		C37 H63 N2 O10 P	Full match	No results	No results	No match	-1.65	726.421	749.41	9.923	1	0		No MS2	[M+Na]+1	2.14629e+06	3.14549e+08	1.54728e+06	1.36704e+07	1.04165e+06	2.55241e+06	4.72954e+06	2.39202e+08	2.85058e+08	651871	2.51314e+06	6.89476e+08	2.86557e+06	4.12469e+08	4.40751e+06	1.00934e+07	7.94271e+06	2.60722e+08	1.07301e+06	279663	253785	206091	1.18786e+07	1.13042e+07	1.09599e+07	1.11091e+07	1.15594e+07	1.15369e+07	1.33864e+07	8.0591e+06	2.47174e+08	638279	2.84513e+06	4.29143e+06
TRUE		C40 H83 N5 O7 P2	Full match	No results	No results	No match	0.07	807.577	790.573	12.105	55	0		No MS2	[M+H-H2O]+1	1.58127e+08	726539	2.33434e+08	2.04135e+08	1.65165e+08	8.17726e+07	643796	3.50003e+08	1.70373e+08	2.08539e+08	1.08363e+08	984924	6.63321e+08	6.89474e+08	4.79143e+08	1.23014e+08	674775	3.3578e+08	2.63992e+08	316464	302574	307149	8.40166e+07	2.84288e+07	9.7633e+07	2.36486e+08	2.20564e+08	1.94614e+08	4.23871e+07	3.95363e+08	2.19346e+08	855692	1.94588e+08	2.10728e+08
TRUE	20-Oxopregn-5-en-3-yl hydrogen sulfate	C21 H32 O5 S	Full match	No results	No results	Full match	0.15	396.197	395.19	10.535	2	0		No MS2	[M-H]-1	7.32347e+06	1.14398e+06	1.26383e+06	2.10635e+06	6.89205e+08	697069	926401	3.94805e+06	1.59201e+07	905342	3.92548e+06	1.13582e+06	727217	2.80537e+06	485847	1.07237e+06	1.06564e+06	2.26752e+06	746612	62712.2	55444.6	58895.2	2.17998e+06	2.193e+06	1.94831e+06	2.08882e+06	2.19842e+06	2.33041e+06	2.81927e+06	6.94547e+06	2.94725e+07	4.0354e+06	3.2778e+06	2.3076e+06
TRUE	1-[(8Z,11Z,14Z,17Z)-icosatetraenoyl]-sn-glycero-3-phosphocholine	C28 H50 N O7 P	Full match	No results	No results	Full match	2.27	543.334	544.341	10.817	3	0		DDA for preferred ion	[M+H]+1	3.25525e+08	3.33985e+08	4.89131e+08	1.53896e+08	9.79211e+07	2.09691e+08	1.19785e+08	2.28137e+08	2.34819e+08	3.24417e+08	6.18865e+08	3.69785e+08	2.22391e+08	1.64282e+08	1.56226e+08	1.97029e+08	2.05768e+08	2.61126e+08	1.82866e+08	280441	271097	203600	6.45075e+07	6.09205e+07	5.84424e+07	5.90164e+07	5.74803e+07	6.21024e+07	5.58091e+07	2.74816e+08	3.88745e+08	2.96809e+08	3.48442e+08	6.8892e+08
TRUE		C7 H13 N O2 S	Full match	No results	No results	No results	2.05	175.067	176.074	5.312	0	0		No MS2	[M+H]+1	2.22664e+07	1.62248e+08	2.21713e+08	6.89593e+07	6.16695e+06	1.49661e+08	177077	4.74611e+07	1.41475e+08	2.75787e+08	166250	199143	173156	1.22926e+07	5.57962e+06	720266	668687	1.52451e+07	1.93342e+06	157651	160885	163598	1.22234e+06	1.10555e+06	1.05567e+06	790207	1.07374e+06	622067	1.18208e+06	4.99055e+06	2.02723e+08	185022	5.35297e+08	4.20707e+08
TRUE	Isoxaben	C18 H24 N2 O4	Full match	No results	No results	Full match	2.4	332.174	333.182	1.278	1	0		No MS2	[M+H]+1	550114	600259	675493	380073	394780	427158	3.70793e+07	526461	485493	510003	263539	332501	243299	328836	261856	271987	6.87416e+08	367692	259487	157280	162012	153632	2.58538e+06	787449	828137	669270	591848	1.12834e+06	1.02144e+06	292750	840333	401580	650618	629645
TRUE		C38 H84 N8 O6 P2	Full match	No results	No results	No results	-0.46	810.599	811.606	11.894	0	0		No MS2	[M+H]+1	1.03085e+08	2.88998e+06	2.75191e+08	1.34676e+07	1.15458e+08	5.76319e+07	1.24265e+06	6.43673e+08	2.01914e+08	2.12822e+08	1.17972e+08	1.60577e+06	2.00839e+07	5.94582e+07	3.13913e+07	3.10467e+07	1.39421e+06	4.31484e+07	5.2782e+07	915444	948290	900432	9.26659e+07	8.77748e+07	2.47062e+08	4.12115e+07	2.2999e+08	3.37761e+08	4.01047e+07	3.82492e+07	1.06389e+08	4.13003e+06	6.87311e+08	3.3574e+07
TRUE		C42 H70 O15	Full match	No results	No results	No results	2.09	814.473	837.462	9.944	0	0		No MS2	[M+Na]+1	707165	2.99452e+08	2.73384e+06	1.34377e+07	1.01471e+06	1.6717e+06	4.61783e+06	2.01908e+08	3.00864e+08	381327	4.81196e+06	6.87049e+08	2.87546e+06	3.85067e+08	4.48711e+06	8.29229e+06	7.3714e+06	3.35157e+08	611224	159698	157736	159938	8.21698e+06	9.2313e+06	9.35482e+06	1.17157e+07	1.03882e+07	1.19168e+07	1.12923e+07	5.70259e+06	2.52609e+08	848900	609861	2.66142e+06
TRUE		C37 H79 N5 O3 P2	Full match	No results	No results	No results	-3.3	703.563	767.579	10.688	0	0		No MS2	[M+ACN+Na]+1	2.54946e+08	6.03605e+06	2.04092e+08	2.27643e+08	3.33748e+08	4.51767e+07	2.3988e+06	1.308e+08	3.08665e+08	2.186e+08	2.66281e+08	1.02967e+07	6.86857e+08	6.38324e+08	2.68705e+08	9.4872e+07	2.98114e+06	4.80019e+08	3.08031e+08	1.80833e+06	1.64056e+06	1.60817e+06	2.19792e+08	2.06407e+08	2.79312e+08	3.29996e+08	4.00969e+08	3.49628e+08	1.15892e+07	5.04664e+08	2.62287e+08	4.8665e+06	1.57942e+08	2.40621e+08
TRUE		C35 H80 N7 O6 P3	Full match	No results	No results	No match	-1.22	787.537	788.545	12.62	24	0		No MS2	[M+H]+1	6.46742e+06	4.13996e+07	1.83984e+07	1.71652e+07	4.65224e+06	2.10395e+07	1.41525e+07	1.7603e+07	2.19272e+07	8.23451e+06	2.87276e+07	2.16589e+07	3.82878e+06	1.19041e+07	3.28831e+06	2.45112e+07	1.07927e+07	4.68321e+06	1.24006e+07	1.3787e+06	1.34496e+06	1.14921e+06	5.40444e+06	8.47654e+06	1.63789e+07	2.06756e+07	1.94147e+07	1.78851e+07	4.81579e+06	4.29145e+06	1.70129e+07	6.82328e+06	2.42778e+07	1.7866e+07
TRUE		C77 H157 Cl N10 O14 P2 S	Full match	No results	No results	No results	0.71	1575.08	788.546	12.618	0	0		No MS2	[M+2H]+2	6.46742e+06	4.13996e+07	1.22279e+07	1.20604e+07	3.09865e+06	1.19054e+07	7.9558e+06	1.17755e+07	1.40686e+07	8.92222e+06	1.52035e+07	1.49118e+07	2.90419e+06	7.91347e+06	2.38799e+06	1.52197e+07	6.02676e+06	2.67917e+06	8.37725e+06	723249	786572	672088	3.27933e+06	5.08636e+06	9.70141e+06	1.22137e+07	1.15372e+07	1.04336e+07	2.62203e+06	2.34016e+06	1.12643e+07	4.54614e+06	1.07139e+07	1.53084e+07
TRUE	1-{[(2R,4S,5S)-5-{[Benzyl(methyl)amino]methyl}-1-azabicyclo[2.2.2]oct-2-yl]methyl}-3-(3-thienyl)urea	C22 H30 N4 O S	Not the top hit	Full match	No results	No match	-3.65	398.213	397.205	10.199	1	1	7.6	DDA for preferred ion	[M-H]-1	2.7512e+07	3.83676e+06	4.13906e+06	4.83645e+06	6.85236e+08	2.97509e+06	1.77344e+06	1.0869e+07	4.47809e+07	5.12286e+06	1.32881e+07	3.67469e+06	2.83778e+06	1.00329e+07	1.11324e+06	3.51152e+06	2.32319e+06	1.15096e+07	3.30771e+06	57521	49250.6	54485.9	2.58864e+06	2.70524e+06	2.80275e+06	2.67496e+06	2.69323e+06	2.92307e+06	2.92837e+06	2.74815e+07	7.97658e+07	6.46835e+06	1.85359e+07	9.51938e+06
TRUE		C48 H91 N10 O18 P	Full match	No results	No results	No results	0.31	1126.63	564.32	7.746	0	0		DDA for other ion	[M+2H]+2	1.16946e+08	2.74978e+08	2.89119e+08	5.30766e+06	6.38624e+07	1.79686e+07	2.04451e+07	1.33791e+08	9.45093e+07	1.17126e+08	2.89992e+06	3.51907e+06	476112	2.71758e+07	6.6809e+06	6.32849e+06	4.99808e+06	7.78781e+06	4.98929e+06	58506.9	30784.9	46626.5	1.91073e+06	2.44732e+06	3.27648e+06	3.4988e+06	1.74939e+06	2.68365e+06	3.40386e+06	1.54419e+07	3.81284e+08	7.09428e+06	1.25456e+08	1.24243e+08
TRUE		C27 H59 N9 O11	Full match	No results	No results	No results	0.01	685.433	686.441	13.431	0	0		DDA for preferred ion	[M+H]+1	1.45902e+07	1.40065e+07	1.01594e+07	7.90957e+06	4.85758e+07	1.43056e+07	2.71657e+07	8.59232e+06	6.11101e+06	1.06413e+07	1.37919e+07	4.14754e+06	7.94898e+06	6.90364e+06	5.55065e+06	1.01014e+07	1.13139e+07	1.03481e+07	8.50974e+06	1.66345e+07	2.12521e+07	1.6463e+07	5.33947e+07	1.01016e+07	8.77751e+06	1.10093e+07	8.32046e+06	8.0459e+06	3.86783e+07	1.96756e+07	1.31145e+07	1.67084e+07	1.06105e+07	8.69711e+06
TRUE		C33 H70 N9 O7 P	Full match	No results	No results	No results	2.45	735.515	736.523	11.071	0	0		No MS2	[M+H]+1	5.93915e+07	1.74449e+07	5.05776e+07	2.44262e+06	6.24851e+06	7.43238e+07	5.34706e+06	1.48979e+07	2.44614e+07	1.01747e+07	1.57903e+08	5.20958e+07	1.82757e+08	6.1016e+06	3.39892e+07	3.84392e+08	6.24274e+06	2.89426e+07	7.1405e+07	652558	668662	681519	1.95908e+07	7.40183e+06	8.8315e+06	9.1828e+06	4.14831e+06	8.57267e+06	1.06865e+07	9.41658e+07	3.05774e+07	9.4199e+07	3.92058e+07	7.88104e+07
TRUE	1,2,3,4-tetrahydro-β-carboline-3-carboxylic acid	C12 H12 N2 O2	Full match	No results	No results	Full match	3.03	216.091	217.098	5.172	1	0		No MS2	[M+H]+1	1.81251e+07	1.97301e+07	3.40116e+06	208082	218769	239674	9.27311e+07	676004	254214	273894	7.3469e+07	1.77957e+08	8.57067e+07	856824	308007	205077	4.73986e+06	206403	286335	193991	179306	191842	2.92164e+06	2.26235e+06	2.60361e+06	3.31259e+06	2.35556e+06	3.20492e+06	3.24229e+06	2.82926e+07	2.31488e+06	2.01822e+08	2.53575e+06	2.05215e+06
TRUE		C47 H82 N5 O4 P	Full match	No results	No results	No match	0.13	811.611	812.618	11.713	39	0		No MS2	[M+H]+1	1.3981e+08	2.6988e+08	2.54216e+06	1.16171e+08	9.37971e+07	1.61232e+06	1.40288e+08	2.0883e+06	6.80064e+08	1.71558e+08	2.60311e+06	1.59644e+08	3.0625e+06	1.35325e+07	6.98024e+07	1.88803e+06	4.64523e+08	2.46718e+06	3.52554e+07	1.0026e+06	965611	959455	1.1574e+06	1.23987e+08	1.3368e+08	4.69886e+07	2.76934e+07	5.98469e+07	1.2633e+06	2.60689e+07	2.39369e+06	9.48201e+07	3.76036e+06	9.73824e+07
TRUE		C47 H76 N5 O4 P	Full match	No results	No results	No match	0.04	805.564	806.571	12.825	52	0		No MS2	[M+H]+1	1.31865e+06	1.17434e+07	4.76179e+06	6.86422e+06	4.72562e+06	5.49563e+06	1.07875e+06	2.04008e+08	2.81899e+06	5.56513e+06	1.66817e+06	7.27135e+06	6.95815e+06	7.21744e+06	8.80696e+06	4.92095e+06	6.46722e+06	1.16351e+07	4.79759e+06	1.08432e+06	1.11148e+06	984172	2.91504e+06	3.23613e+06	5.14341e+06	1.31253e+06	4.83762e+06	3.87526e+06	1.56969e+06	4.76751e+06	1.19391e+07	2.50405e+07	7.59211e+06	1.3383e+07
TRUE		C35 H77 N9 O2 P2	Full match	No results	No results	No match	2.54	717.569	718.577	10.88	14	0		No MS2	[M+H]+1	1.19515e+08	8.32283e+06	1.23888e+08	4.22982e+08	4.65478e+08	9.9552e+07	3.56018e+06	1.08077e+08	9.84842e+07	6.66068e+07	1.23116e+08	1.18395e+07	1.06993e+08	1.18395e+08	1.20369e+08	1.40718e+08	4.25499e+06	2.13595e+08	5.45861e+07	2.06709e+06	2.20513e+06	2.00154e+06	9.9132e+07	3.46412e+06	1.08299e+08	3.71392e+07	4.58205e+07	5.01472e+07	6.74777e+06	5.97612e+07	1.27938e+08	8.78492e+06	2.66474e+08	5.94612e+07
TRUE		C37 H75 N9 O5 P2	Full match	No results	No results	No match	1.56	787.538	788.545	13.721	24	0		No MS2	[M+H]+1	1.01657e+06	1.95569e+06	932186	935189	953523	3.61609e+06	1.76066e+06	896982	1.04743e+06	933516	1.49146e+07	3.85507e+07	1.06637e+07	8.66401e+06	1.13394e+06	5.23377e+06	4.61008e+06	3.63105e+06	1.06489e+07	741129	753653	803956	947056	936616	944268	2.47303e+06	1.30355e+06	1.23152e+06	896063	2.59747e+06	6.11528e+06	1.00793e+06	5.62947e+06	5.04759e+06
TRUE		C36 H66 O10	Full match	No results	No results	No results	2.5	658.467	681.456	11.61	0	0		No MS2	[M+Na]+1	5.32634e+07	4.69965e+06	2.2606e+07	1.06116e+06	4.01455e+06	2.08358e+07	3.63993e+06	5.09579e+06	5.41909e+06	4.65907e+06	8.71606e+07	3.61226e+07	2.65123e+08	2.80657e+06	5.29919e+07	6.79609e+08	1.08563e+06	3.3483e+06	9.10043e+07	654086	683737	675582	4.15035e+06	5.35054e+06	3.28288e+06	3.64476e+06	3.38739e+06	4.07149e+06	4.8003e+06	9.04955e+06	6.90682e+06	3.14672e+07	1.0627e+07	1.43022e+07
TRUE		C33 H61 N8 O5 P	Full match	No results	No results	No results	-1.64	680.449	681.456	11.619	0	0		No MS2	[M+H]+1	5.32634e+07	4.69965e+06	2.2606e+07	901221	4.01455e+06	2.08358e+07	3.63993e+06	5.08772e+06	4.49685e+06	4.41292e+06	4.00523e+07	3.61226e+07	2.65123e+08	2.80267e+06	5.29919e+07	6.79609e+08	1.08563e+06	3.3483e+06	9.10043e+07	555502	580683	573757	4.15035e+06	5.35054e+06	3.28288e+06	3.19828e+06	3.38739e+06	4.07149e+06	4.56267e+06	9.04955e+06	6.90682e+06	3.14672e+07	1.0627e+07	1.43022e+07
TRUE		C85 H135 O18 P3	Full match	No results	No results	No results	-0.07	1536.89	513.303	8.959	0	0		DDA for other ion	[M+3H]+3	7.76825e+07	1.29082e+08	5.93297e+06	6.05712e+06	7.76738e+06	2.3382e+07	5.85551e+06	2.25171e+07	831870	2.51817e+07	3.41682e+08	1.47607e+08	1.22132e+07	1.03366e+08	2.38012e+07	4.77287e+08	8.72813e+06	4.08536e+07	4.69359e+07	4.70114e+06	4.45369e+06	3.96391e+06	5.67887e+07	5.77355e+07	5.83705e+07	3.75452e+07	7.34615e+07	6.75904e+07	6.53188e+07	5.53454e+06	1.1436e+07	1.42711e+07	2.22217e+08	6.03944e+08
TRUE		C41 H68 N10 O8	Full match	No results	No results	No results	0.94	828.523	829.53	11.066	0	0		No MS2	[M+H]+1	1.13938e+08	7.3501e+07	3.32349e+07	6.84498e+06	8.26931e+06	5.78156e+07	5.78519e+06	4.14644e+07	1.06899e+08	8.67545e+06	3.46074e+08	2.30806e+08	4.3572e+08	1.40128e+07	3.68002e+07	1.99464e+08	6.17074e+06	1.13454e+08	1.13504e+08	616620	631838	643987	1.73019e+07	1.69069e+07	7.10922e+06	1.69858e+07	1.63448e+07	1.64333e+07	1.88996e+07	8.3323e+07	7.84657e+07	1.43206e+08	5.69671e+07	1.35694e+08
TRUE		C12 H22 N6 O	Full match	No results	No results	No results	3.41	266.186	267.194	9.979	0	0		DDA for preferred ion	[M+H]+1	6.54991e+06	1.61369e+07	2.87303e+06	3.42116e+06	1.3696e+06	3.83781e+06	8.17687e+07	2.86063e+06	4.18328e+06	4.38112e+06	1.19464e+06	1.89852e+06	2.53741e+06	1.26858e+06	1.69556e+06	1.70938e+06	6.76895e+08	1.10359e+06	1.00368e+06	2.18796e+06	1.76534e+06	1.04005e+06	5.12128e+06	8.04805e+06	6.88902e+06	8.99018e+06	6.97651e+06	7.3645e+06	7.96322e+06	2.19504e+07	1.92141e+07	2.387e+07	8.06957e+06	4.29939e+07
TRUE		C68 H105 N6 O8 P3	Full match	No results	No results	No results	-0.2	1226.72	614.367	10.593	0	0		No MS2	[M+2H]+2	452192	1.42899e+08	495477	1.81606e+06	383823	494107	2.81705e+06	8.60216e+07	1.53631e+08	472027	626074	6.76377e+08	631215	1.85113e+08	411945	3.53028e+06	1.70641e+06	1.50784e+08	466520	283415	273383	268003	2.00418e+06	2.27354e+06	2.73023e+06	3.21492e+06	2.70509e+06	3.49316e+06	3.11178e+06	2.27523e+06	1.30041e+08	376135	545265	567977
TRUE		C41 H78 N4 O17	Full match	No results	No results	No match	0.63	898.537	450.276	8.729	1	0		DDA for other ion	[M+2H]+2	3.92452e+07	3.83979e+07	2.21151e+07	2.48551e+07	2.02648e+07	3.95205e+07	2.77263e+07	3.90599e+07	3.22426e+07	2.34551e+07	9.51994e+07	6.67848e+07	7.8696e+07	5.84111e+07	3.36275e+07	1.30079e+08	2.57731e+07	4.64601e+07	3.84542e+07	2.5677e+07	2.95559e+07	3.0448e+07	3.45346e+07	3.56813e+07	3.5766e+07	4.97797e+07	3.31653e+07	3.71999e+07	3.21379e+07	3.74226e+07	3.06758e+07	2.95517e+07	5.09659e+07	1.21811e+08
TRUE		C31 H77 N10 O3 P3	Full match	No results	No results	No match	-4.64	730.536	731.543	12.277	1	0		No MS2	[M+H]+1	1.28736e+06	2.01929e+08	2.76567e+08	1.72626e+08	9.76954e+07	1.31822e+06	8.69296e+07	7.85036e+07	8.20969e+07	2.16534e+08	1.5142e+06	1.13258e+08	6.15413e+07	4.84497e+07	1.17557e+08	1.27865e+06	6.76883e+07	1.78827e+07	3.83816e+07	527239	447171	534378	3.64868e+07	869000	924018	852936	877991	940253	1.13296e+06	2.17955e+07	1.53603e+06	3.06182e+07	8.1913e+07	2.11646e+08
TRUE		C21 H40 N2 P2	Full match	No results	No results	No results	2.51	382.268	806.569	10.661	0	0		DDA for other ion	[2M+ACN+H]+1	2.02698e+08	2.43304e+06	5.16275e+08	3.43005e+08	4.14398e+08	2.10296e+08	767588	6.72019e+08	4.1997e+08	1.22425e+08	1.09958e+08	4.15042e+06	1.82361e+08	2.63576e+08	3.7157e+08	1.39845e+08	1.20165e+06	2.05895e+08	1.89105e+08	627302	557012	529452	2.33448e+08	2.89213e+08	6.54299e+08	3.84354e+08	6.14839e+08	5.12759e+08	7.05491e+07	1.21919e+08	2.28375e+08	898000	5.0838e+08	7.40008e+07
TRUE		C28 H58 O15	Full match	No results	No results	No results	1.97	634.379	635.386	8.954	0	0		No MS2	[M+H]+1	1.64551e+07	2.27724e+07	3.32044e+06	2.90755e+06	4.60912e+06	6.20287e+06	4.44826e+06	6.83205e+06	5.56086e+06	5.35064e+06	5.29548e+07	2.61161e+07	3.78673e+06	1.06907e+07	1.23435e+07	1.02068e+08	6.0445e+06	7.32737e+06	1.62756e+07	6.76207e+06	6.91444e+06	6.45026e+06	1.29734e+07	1.48175e+07	1.3409e+07	1.25074e+07	1.37458e+07	1.68962e+07	1.42803e+07	2.47483e+06	4.01157e+06	6.08972e+06	2.37049e+07	1.04235e+08
TRUE		C30 H50 N8 O7	Full match	No results	No results	No results	-2.1	634.379	635.386	8.763	0	0		No MS2	[M+H]+1	5.18786e+06	2.89731e+06	2.14896e+06	2.56346e+06	3.59604e+06	4.35466e+06	951947	1.47379e+06	1.47571e+06	1.68539e+06	4.47359e+06	2.78943e+06	5.9341e+06	1.57675e+06	4.46087e+06	5.04961e+06	6.0445e+06	1.90101e+06	1.62756e+07	5.07267e+06	4.08237e+06	5.23568e+06	4.1038e+06	3.56134e+06	5.50499e+06	5.4643e+06	4.4507e+06	3.62533e+06	1.45388e+06	2.47483e+06	4.01135e+06	1.55622e+06	2.35018e+07	3.92592e+06
TRUE		C27 H62 N9 O3 P3	Full match	No results	No results	No results	3.39	653.421	654.428	11.127	0	0		No MS2	[M+H]+1	1.04502e+08	3.65007e+07	3.9383e+07	4.52944e+06	1.85474e+07	5.42929e+07	1.34092e+07	1.75389e+07	2.63796e+07	2.0737e+07	1.68722e+08	1.24624e+08	3.40961e+08	7.07414e+06	5.41029e+07	6.69312e+08	1.38983e+07	3.85192e+07	8.59156e+07	605081	633535	623695	1.07534e+07	7.93899e+06	1.55168e+07	1.51661e+07	1.58463e+07	1.71052e+07	1.57457e+07	5.66995e+07	3.57322e+07	1.51823e+08	5.42961e+07	1.0654e+08
TRUE		C25 H49 N4 O3 P	Full match	No results	No results	No match	4.43	484.356	548.372	11.7	14	0		DDA for other ion	[M+ACN+Na]+1	3.26142e+08	2.53886e+08	3.80467e+08	6.55223e+07	4.10548e+07	1.2362e+08	6.20791e+07	3.13045e+08	1.13216e+08	3.82791e+08	1.17829e+08	5.59918e+07	5.04451e+07	3.51732e+07	4.56005e+06	2.42552e+07	7.47245e+07	9.75358e+06	1.23863e+07	373477	399636	356788	4.59706e+06	5.71453e+06	1.00006e+07	4.60763e+06	9.78453e+06	5.91608e+06	1.05221e+07	1.21225e+08	6.68651e+08	3.27619e+08	3.80831e+08	5.16901e+08
TRUE		C29 H50 N5 O3 P	Full match	No results	No results	No match	-0.37	547.365	548.372	11.705	2	0		DDA for preferred ion	[M+H]+1	3.26142e+08	2.62283e+08	3.80467e+08	6.55223e+07	4.08543e+07	1.33915e+08	6.20791e+07	3.1759e+08	1.13216e+08	3.82791e+08	1.17829e+08	5.59918e+07	5.04451e+07	3.51732e+07	4.56005e+06	2.611e+07	7.47245e+07	9.75358e+06	1.23863e+07	417235	446459	398590	4.59706e+06	5.71453e+06	1.00006e+07	4.60763e+06	9.78453e+06	5.91608e+06	1.05221e+07	1.1781e+08	6.68651e+08	3.27619e+08	3.80831e+08	5.16901e+08
[truncated: 31,475 more rows]
[truncated: 39 more columns]

## Sheet: Description of result table
Result table	Description
Name	Name of the compound
[truncated: 25 more rows]

## Sheet: LC conditions
Column1	Column2		Column1	Column2	Column3	Column4		Column1	Column2
[truncated: 19 more rows]

[truncated: 3 more sheets: MS conditions, Data processing, Statistical Methods]
