# Supplementary material for: Intratumoural microbial metabolites in breast cancer: A longitudinal study on association with metastatic progression
Source: Research Square preprint supplement (doi:10.21203/rs.3.rs-7336523/v1), 2025-08-21
Supplement: Supplementary file 3 [file 5a626ec59297077e263e4e38.docx]

**Supplementary figures**

**Intratumoural microbial metabolites in breast cancer: A longitudinal study on association with metastatic progression**

Srinidhi Narayani Seenivasan1,2, Samrat Ashok Vasudevan1,2, Avinash Kumar Raghupathy1, Firoz Rajan3, Ezhir Selvan3, Sangita Mehta Sharma4, Rajeswari K Muthusamy4, Lavanya Paramasivam4, Shobanaa Pechimuthubabu Seethalakshmi4, Sharmila Yogeswaran4, Velmurugan Ganesan1*

1Chemomicrobiomics Laboratory, Department of Biochemistry & Microbiology, KMCH Research Foundation, Coimbatore, Tamil Nadu, India.

2School of Chemical and Biotechnology, SASTRA (Deemed to be University), Thanjavur, Tamil Nadu, India.

3Department of Surgical Oncology, Comprehensive Cancer Center, Kovai Medical Center & Hospital, Coimbatore, Tamil Nadu, India.

4Department of Pathology, Kovai Medical Center & Hospital, Coimbatore, Tamil Nadu, India.


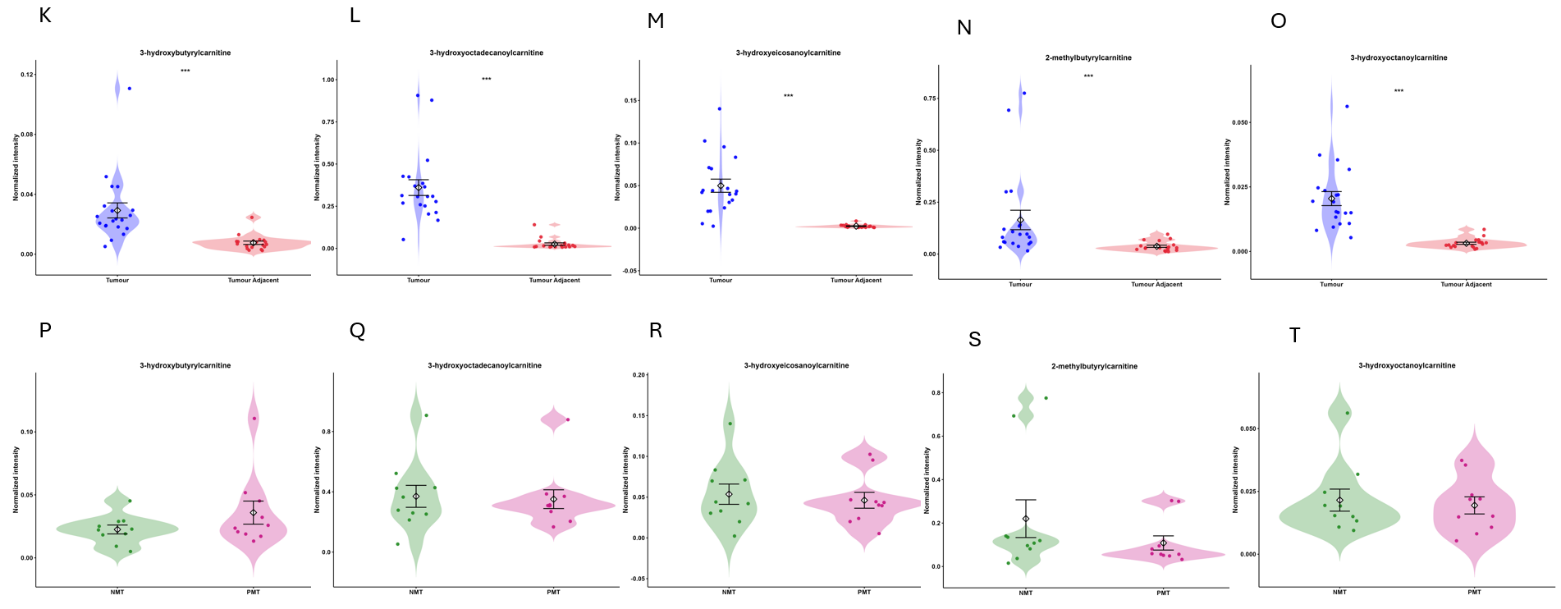

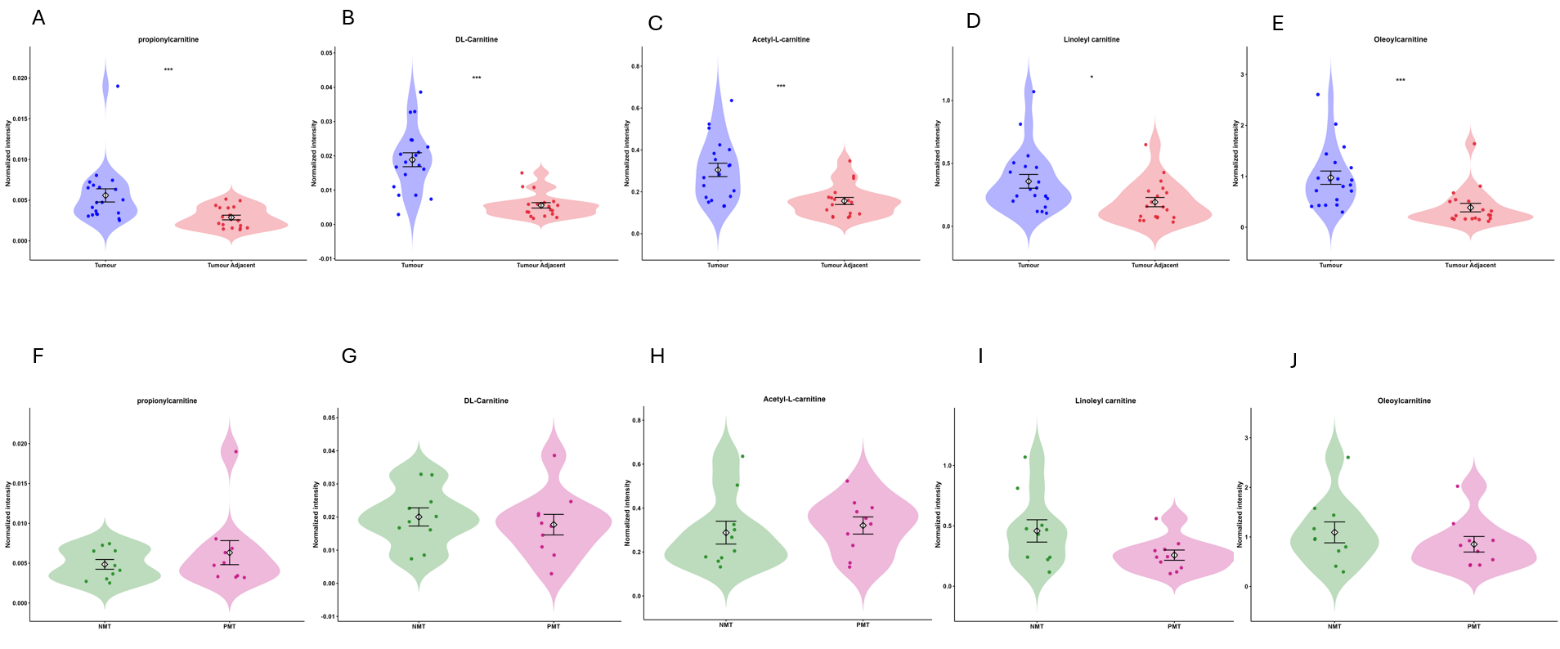


**Figure S1:** (A-T)Violin plots depicting the distribution and expression levels of carnitine derivatives between Tumour & tumour adjacent tissues and pre-metastatic & non-metastatic tumour. Propionyl carnitine, DL-carnitine, acetyl-carnitine, linoleyl carnitine, oleoyl carnitine, 3-hydrozybutryl carnitine, 3-hydroxyoctadecanoyl carnitine, 3-hydroxyeicosanoyl carnitine, 3-methylbutyryl carnitine, 3-hydroxyoctanoylcarnitine. Asterisks indicate statistical significance: *p < 0.05; **p < 0.01; ***p < 0.001. Error bars in violin-dot plots represents the mean±SEM.


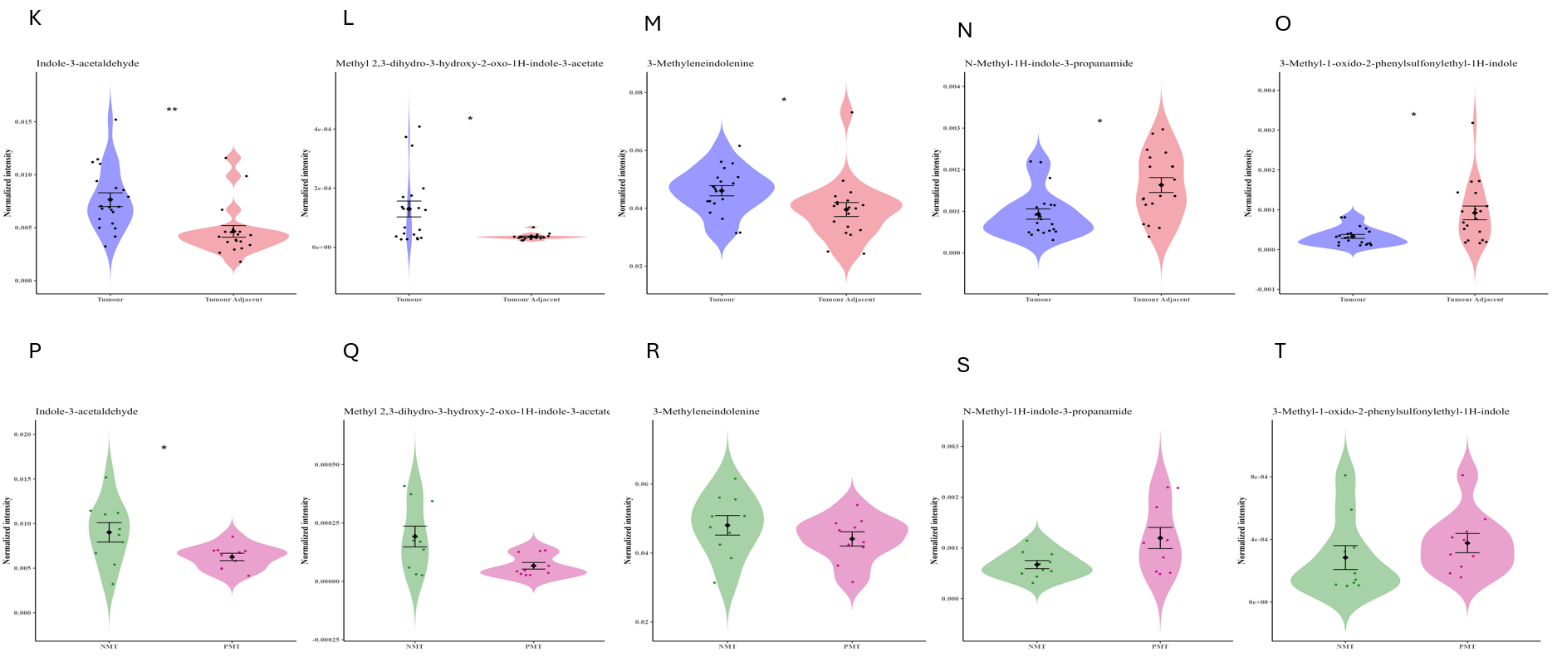

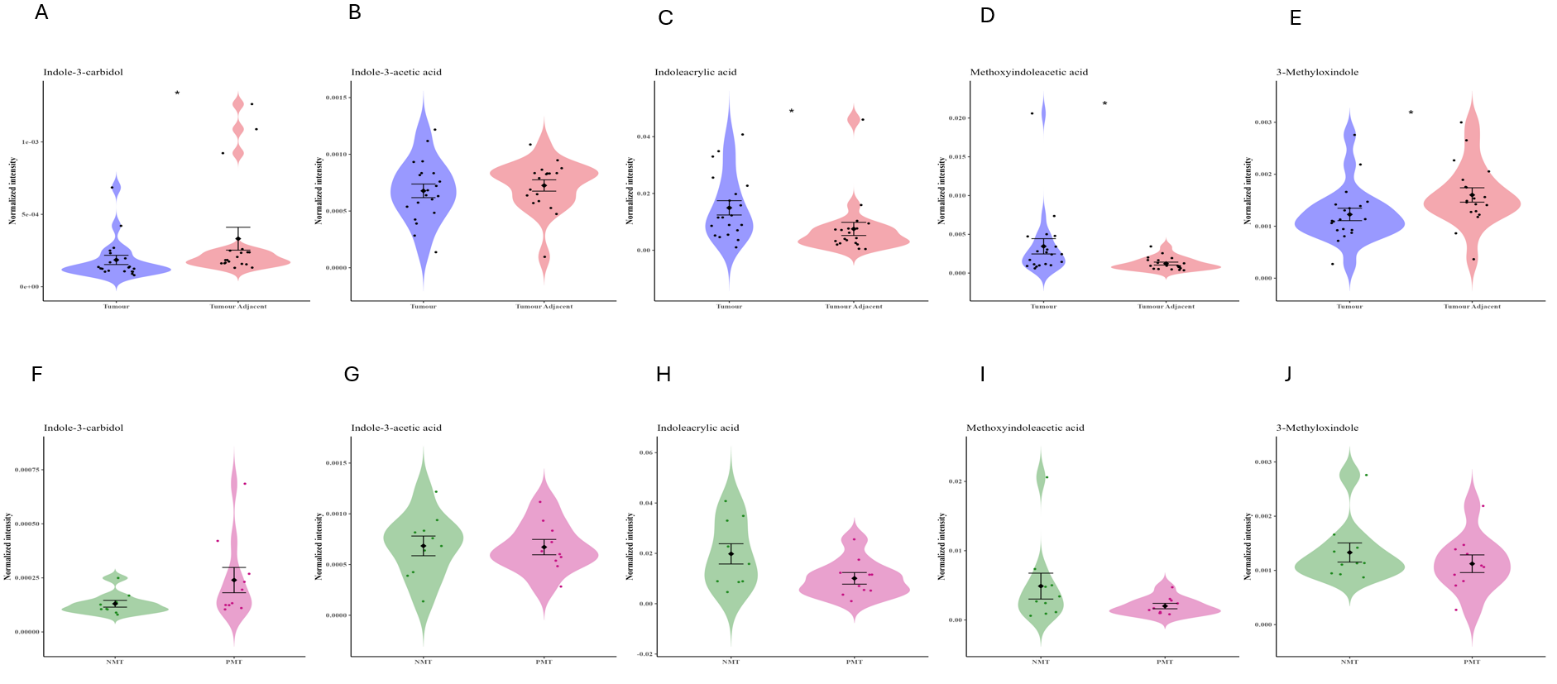


**Figure S2:** (A-T)Violin plots depicting the distribution and expression levels of indole derivatives between Tumour & tumour adjacent tissues and pre-metastatic & non-metastatic tumour. Indole-3-carbidol, indole-3-acetic acid, indoleacrylic acid, methoxyindoleacetic acid, 3-methyloxindole, indole-3-acetaldehyde, methyl2,3-dihydro-3-hydroxy-2-oxo-1H-indol-3-acetate, 3-methyleneindolenine, N-methyl-1H-indole-3-propanamide, 3-methyl-1-oxido-2-phenylsulfonylethyl-1H-indole. Asterisks indicate statistical significance: *p < 0.05; **p < 0.01; ***p < 0.001. Error bars in violin-dot plots represent the mean ± SEM.


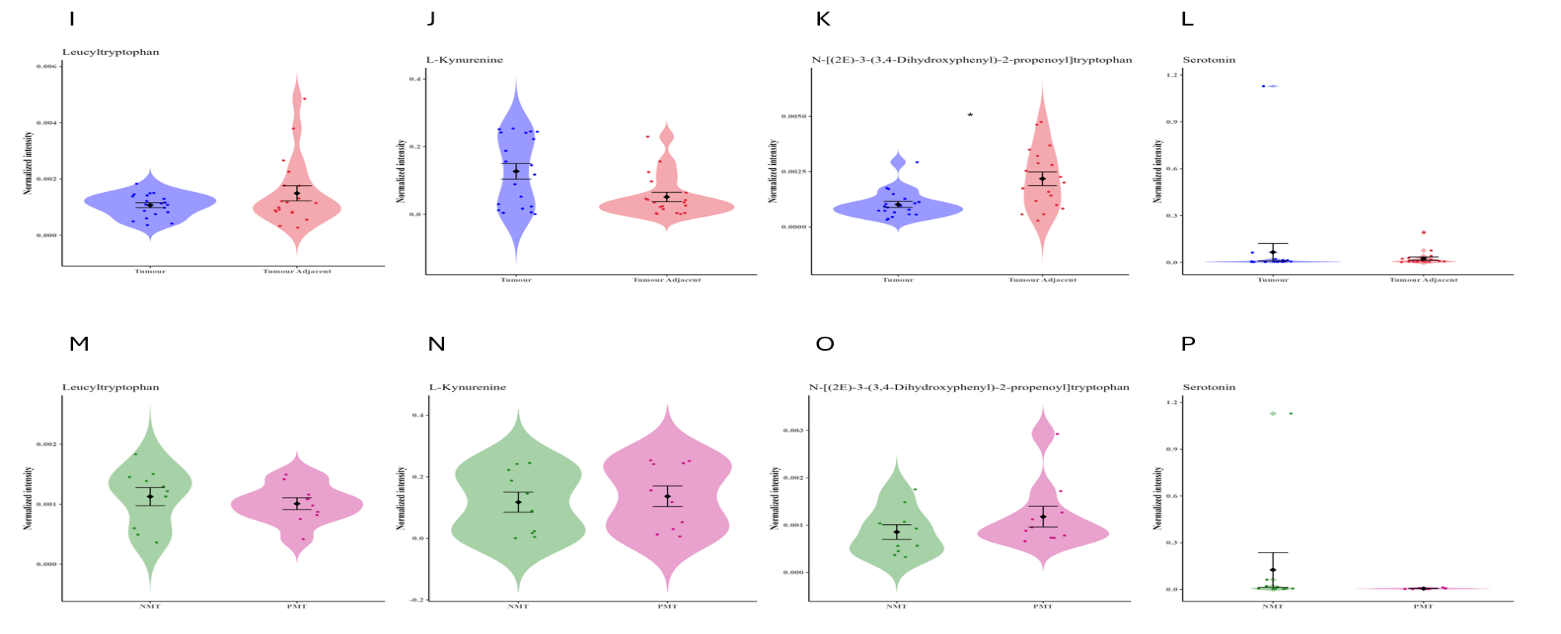

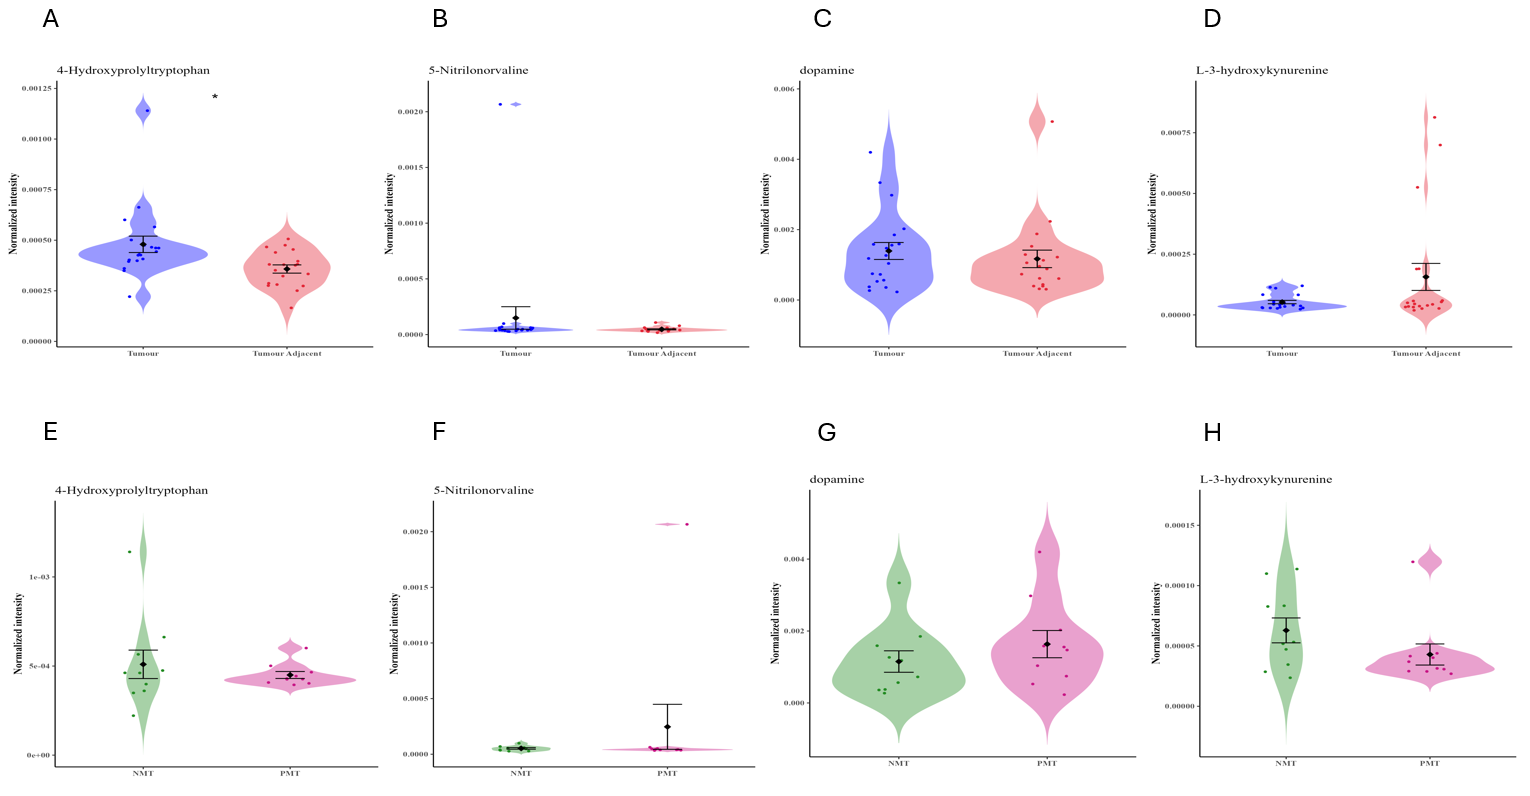


**Figure S3:** (A-P)Violin plots depicting the distribution and expression levels of tryptophan derivatives between Tumour & tumour adjacent tissues and pre-metastatic & non-metastatic tumour. 4-Hydroxyprolyltryptophan, 5-nitrilonorvaline, dopamine, L-3-hydroxykynurenine, leucyltryptophan, L-kynuernine, N-[(2E)-3-(3,4-Dihydroxyphenyl)-2-propenoyl] tryptophan, serotonin. Asterisks indicate statistical significance: *p < 0.05; **p < 0.01; ***p < 0.001. Error bars in violin-dot plots represent the mean ± SEM.


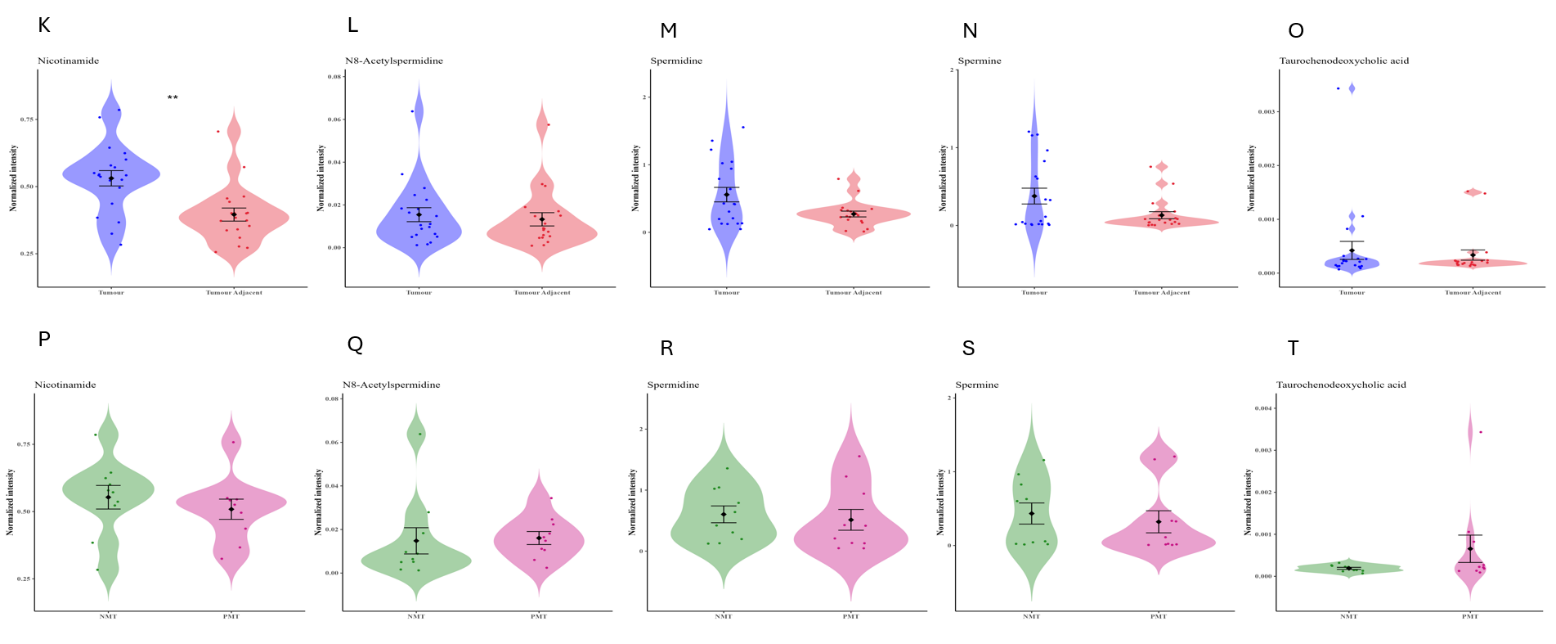

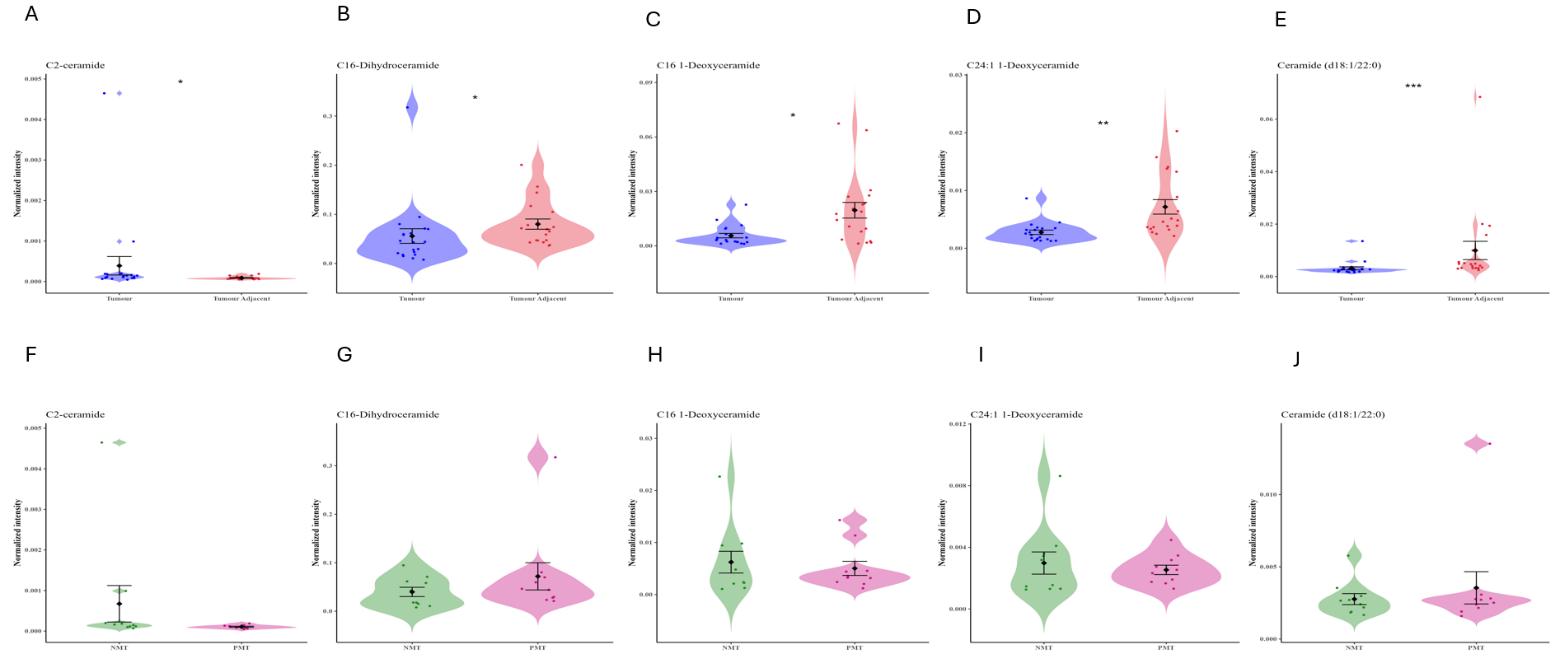


**Figure S4:** (A-T)Violin plots depicting the distribution and expression levels of ceramide, polyamines and bile acids between Tumour & tumour adjacent tissues and pre-metastatic & non-metastatic tumour. C2-ceramide, C16-dihydroceramide, C16 1-deoxyceramide, C24:1 1-deoxyceramide, ceramide (d18:1/22:0), nicotinamide, N8-acetylspermidine, spermidine, spermine, taurochenodeoxycholic aicd. Asterisks indicate statistical significance: *p < 0.05; **p < 0.01; ***p < 0.001. Error bars in violin-dot plots represent the mean ± SEM.
